# Supplementary material
Source: HighWire-hosted journal article supplement (https://erj.ersjournals.com/content/56/1/2000535)
Supplement: inline-supplementary-material-1 [file inline-supplementary-material-1.pdf]

# **Treatment of Nontuberculous Mycobacterial Pulmonary Disease:**

## **An Official ATS/ERS/ESCMID/IDSA Clinical Practice Guideline**

### **Online Supplement**

Charles L. Daley<sup>1, a</sup>, Jonathan M. Iaccarino<sup>2</sup>, Christoph Lange<sup>3, a</sup>, Emmanuelle Cambau<sup>4, a</sup>,  
Richard J. Wallace Jr<sup>5, a</sup>, Claire Andrejak<sup>6</sup>, Erik C. Böttger<sup>7</sup>, Jan Brozek<sup>8</sup>, David E. Griffith<sup>9</sup>,  
Lorenzo Guglielmetti<sup>4,10</sup>, Gwen A. Huitt<sup>12</sup>, Shandra L. Knight<sup>13</sup>, Philip Leitman<sup>14</sup>, Theodore K.  
Marras<sup>15</sup>, Kenneth N. Olivier<sup>16</sup>, Miguel Santin<sup>17</sup>, Jason E. Stout<sup>18</sup>, Enrico Tortoli<sup>19</sup>, Jakko van  
Ingen<sup>20</sup>, Dirk Wagner<sup>21</sup>, Kevin L. Winthrop<sup>22</sup>

<sup>1</sup> National Jewish Health and University of Colorado Health Sciences, Denver, Colorado, USA

<sup>2</sup> Pulmonary Center, Boston University School of Medicine, Boston, MA, USA

<sup>3</sup> Division of Clinical Infectious Diseases, Research Center Borstel, Borstel, Germany, German Center for Infection Research (DZIF), Respiratory Medicine & International Health, University of Lübeck, Lübeck, Germany, and Dept of Medicine, Karolinska Institute, Stockholm, Sweden

<sup>4</sup> National Reference Center for Mycobacteria and Antimycobacterial Resistance, APHP -Hôpital Lariboisière, Bacteriology; Inserm, University Paris Diderot, IAME UMR1137, Paris, France.

<sup>5</sup> Mycobacteria/Nocardia Laboratory, Dept of Microbiology, The University of Texas Health Science Center, Tyler, TX, USA

<sup>6</sup> Respiratory and Intensive Care Unit, University Hospital Amiens, Amiens, France and EA 4294, AGIR, Jules Verne Picardy University, Amiens, France

<sup>7</sup> Institute of Medical Microbiology, National Reference Center for Mycobacteria, University of Zurich, Zurich, Switzerland

<sup>8</sup> Department of Clinical Epidemiology & Biostatistics, McMaster University Health Sciences Centre, 1200 Main Street West, Hamilton, ON L8N 3Z5 Canada.

<sup>9</sup> Pulmonary Infectious Disease Section, University of Texas Health Science Center, Tyler, TX, USA

<sup>10</sup> Team E13 (Bactériologie), Centre d'Immunologie et des Maladies Infectieuses, Sorbonne Université, Université Pierre et Marie Curie, Université Paris 06, Centre de Recherche 7, INSERM, IAME UMR1137, Paris, France

<sup>11</sup> National Jewish Health and University of Colorado Health Sciences, Denver, Colorado, USA

<sup>12</sup> Library and Knowledge Services, National Jewish Health, Denver, Colorado, USA

<sup>13</sup> NTM Info & Research, Miami, FL, USA

<sup>14</sup> Dept of Medicine, University of Toronto and University Health Network, Toronto, ON, Canada

<sup>15</sup> Pulmonary Branch, National Heart, Lung and Blood Institute, Bethesda, MD, USA.

<sup>16</sup> Service of Infectious Diseases, Bellvitge University Hospital-IDIBELL, University of Barcelona, L'Hospitalet de Llobregat, Barcelona, Spain

<sup>17</sup> Division of Infectious Diseases and International Health, Duke University Medical Center, Durham, NC, USA

<sup>18</sup> Emerging Bacterial Pathogens Unit, IRCCS San Raffaele Scientific Institute, Milan, Italy

<sup>19</sup> Radboud Center for Infectious Diseases, Dept of Medical Microbiology, Radboud University Medical Center, Nijmegen, The Netherlands

<sup>20</sup> Division of Infectious Diseases, Dept of Medicine II, Medical Center - University of Freiburg, Faculty of Medicine, University of Freiburg, Freiburg, Germany

<sup>21</sup> Divisions of Infectious Diseases, Schools of Public Health and Medicine, Oregon Health and Science University, Portland, OR, USA

<sup>a</sup> Authors are co-chairs of this guideline committee

## TABLE OF CONTENTS

Table E1. Expert Panel Members

Table E2. Search Strategy

Figure E1. PRISMA Flow Chart

Figure E2. Inclusion and Exclusion Criteria

Tables E3. Evidence Tables E3.1-22

Tables E4. Evidence to Decision Tables E4.1-22

Table E1. EXPERT PANEL MEMBERS

| <b>Name</b>                      | <b>Role</b>       | <b>Society</b> | <b>Expertise</b>                       | <b>Location</b>     |
|----------------------------------|-------------------|----------------|----------------------------------------|---------------------|
| Charles L. Daley, MD             | Lead chair        | ATS            | Pulmonologist                          | Denver, CO, USA     |
| Emmanuelle Cambau, PhD           | Co-chair          | ESCMID         | Microbiologist                         | Paris, France       |
| Christoph Lange, MD, PhD         | Co-chair          | ERS            | Pulmonologist                          | Borstel, Germany    |
| Richard J. Wallace Jr, MD        | Co-chair          | IDSA           | Infectious diseases,<br>microbiologist | Tyler, TX, USA      |
| Jonathan M. Iaccario, MD         | Methodologist     | ATS            | Methodology                            | Boston, MA, USA     |
| Jan Brozek, MD, PhD              | Methodologist     | ATS            | Methodology                            | Hamilton, Canada    |
| Claire Andrejak, MD              | Member            | ERS            | Pulmonologist                          | Amiens, France      |
| Erik C. Böttger                  | Member            | ESCMID         | Microbiologist                         | Zurich, Switzerland |
| David E. Griffith, MD            | Member            | ATS            | Pulmonologist                          | Tyler, TX, USA      |
| Lorenzo Guglielmetti, MD,<br>PhD | Member            | ESCMID         | Infectious Diseases                    | Paris, France       |
| Gwen A. Huitt, MD                | Member            | Ad hoc         | Infectious Diseases                    | Denver, CO, USA     |
| Shandra L. Knight                | Medical Librarian | Ad hoc         | Systematic reviews                     | Denver, CO, USA     |
| Philip Leitman                   | Patient advocate  | Ad hoc         | Patient advocacy                       | Miami, FL, USA      |

|                          |        |        |                     |                           |
|--------------------------|--------|--------|---------------------|---------------------------|
| Theodore K. Marras, MD   | Member | ATS    | Pulmonologist       | Toronto, Canada           |
| Kenneth N. Olivier, MD   | Member | ATS    | Pulmonologist       | Bethesda, MD, USA         |
| Miguel Santin, MD        | Member | ESCMID | Infectious Diseases | Barcelona, Spain          |
| Jason E. Stout, MD       | Member | IDSA   | Infectious Diseases | Durham, NC, USA           |
| Enrico Tortoli, MD       | Member | Ad hoc | Microbiologist      | Milan, Italy              |
| Jakko van Ingen, MD, PhD | Member | ERS    | Microbiologist      | Nijmegen, the Netherlands |
| Dirk Wagner, MD          | Member | ERS    | Infectious Diseases | Freiburg, Germany         |
| Kevin L. Winthrop, MD    | Member | IDSA   | Infectious Diseases | Portland, OR, USA         |

ATS – American Thoracic Society, ERS – European Respiratory Society, ESCMID - European Society of Clinical Microbiology and Infectious Diseases, IDSA - Infectious Diseases Society of America

Table E2. Search Strategy

The Medline search was adapted for execution on the Ovid Platform for Embase, Cochrane Central Register of Controlled Trials (CCTR), Database of Abstracts of Reviews of Effects (DARE), Health Technology Assessment (HTA), and NHS Economic Evaluation Database (NHSEED). Searches for all years were limited to human studies or studies indexed with neither human nor animal; and those published in English or containing an English abstract. A final update was run through July 2018. To supplement the electronic search, reviewers contacted experts and hand searched journals, conference proceedings, reference lists, and regulatory agency Web sites for relevant articles.

MEDLINE 1946 to Present with Daily Update

| #  | Searches                                                                                                                                                  |
|----|-----------------------------------------------------------------------------------------------------------------------------------------------------------|
| 1  | mycobacterium infections, nontuberculous/ or mycobacterium infections, atypical/ or mycobacterium avium-intracellulare infection/                         |
| 2  | nontuberculous mycobacteria/ or mycobacterium avium complex/ or mycobacterium kansasii/ or mycobacterium xenopi/                                          |
| 3  | (mycobacter\$ adj3 (atypical or kansasii\$ or malmoense or xenopi\$ or ab?cessus or massiliense or bolleti\$ or avium or intracellulare or chim?era)).tw. |
| 4  | 2 or 3 [mycobacterium terms]                                                                                                                              |
| 5  | (exp Mycobacterium/ or Mycobacterium Infections/) and (MOTT or NTM or MAC or MAIC).tw.                                                                    |
| 6  | (nontubercul\$ or non-tubercul\$).tw.                                                                                                                     |
| 7  | (Lady adj Windermere\$ Syndrome).tw.                                                                                                                      |
| 8  | 5 or 6 or 7 [additional concepts]                                                                                                                         |
| 9  | 1 or 4 or 8 [Total]                                                                                                                                       |
| 10 | ..l/ 9 lg=en or ab=y [English or English abstract]                                                                                                        |
| 11 | animals/ not humans/                                                                                                                                      |
| 12 | 10 not 11                                                                                                                                                 |
| 13 | (th or tu).xs.                                                                                                                                            |
| 14 | 12 and 13                                                                                                                                                 |

# MEDLINE In-Process & Other Non-Indexed Citations

| # | Searches                                                                                                                                                 |
|---|----------------------------------------------------------------------------------------------------------------------------------------------------------|
| 1 | (mycobacter\$ adj3 (atypical or kansasii\$ or malmoense or xenop\$ or ab?cessus or massiliense or bolleti\$ or avium or intracellulare or chim?era)).tw. |
| 2 | (Mycobacter\$ and (MOTT or NTM or MAC or MAIC)).tw.                                                                                                      |
| 3 | (nontubercul\$ or non-tubercul\$).tw.                                                                                                                    |
| 4 | 1 or 2 or 3                                                                                                                                              |

## Embase 1974 to Present

| #  | Searches                                                                                                                                                                              |
|----|---------------------------------------------------------------------------------------------------------------------------------------------------------------------------------------|
| 1  | atypical mycobacteriosis/ or Mycobacterium avium complex lung disease/                                                                                                                |
| 2  | atypical Mycobacterium/ or mycobacterium avium complex/ or mycobacterium kansasii/ or mycobacterium xenopi/ or mycobacterium abscessus/ or "mycobacterium abscessus subsp. bolletii"/ |
| 3  | (mycobacter\$ adj3 (atypical or kansasii\$ or malmoense xenopi\$ or ab?cessus or massiliense or bolleti\$ or avium or intracellulare or chim?era)).tw.                                |
| 4  | 2 or 3 [mycobacterium terms]                                                                                                                                                          |
| 5  | (exp Mycobacterium/ or mycobacteriosis/) and (MOTT or NTM or MAC or MAIC).tw.                                                                                                         |
| 6  | (nontubercul\$ or non-tubercul\$).tw.                                                                                                                                                 |
| 7  | (Lady adj Windermere\$ Syndrome).tw.                                                                                                                                                  |
| 8  | 5 or 6 or 7 [additional concepts]                                                                                                                                                     |
| 9  | 1 or 4 or 8 [Total]                                                                                                                                                                   |
| 10 | ..1/ 9 lg=en or ab=y [English or English abstract]                                                                                                                                    |
| 11 | animal/ not human/                                                                                                                                                                    |
| 12 | 10 not 11                                                                                                                                                                             |
| 13 | exp respiratory system/                                                                                                                                                               |
| 14 | exp thorax/                                                                                                                                                                           |



|    |                                                                                                                                                                |
|----|----------------------------------------------------------------------------------------------------------------------------------------------------------------|
| 15 | exp respiratory tract disease/                                                                                                                                 |
| 16 | exp lung surgery/                                                                                                                                              |
| 17 | exp respiratory tract agent/                                                                                                                                   |
| 18 | exp respiratory function/                                                                                                                                      |
| 19 | or/13-18                                                                                                                                                       |
| 20 | (lung\$ or pulmon\$ or respirat\$).tw.                                                                                                                         |
| 21 | 19 or 20                                                                                                                                                       |
| 22 | 12 and 21                                                                                                                                                      |
| 23 | random.tw. or clinical trial.mp. or exp health care quality/                                                                                                   |
| 24 | double-blind.mp. or placebo.tw. or blind.tw.                                                                                                                   |
| 25 | (treat\$ or therap\$).ti.                                                                                                                                      |
| 26 | (ad or ae or br or ca or cb or cm or co or ct or dm or dr or dt or ih or im or it or iv or pa or pc or pd or pe or pl or po or sc or si or su or th or to).fs. |
| 27 | or/23-26                                                                                                                                                       |
| 28 | 22 and 27                                                                                                                                                      |

#### CCTR, DARE, CLHTA, CLEED

| # | Searches                                                                                                                                               |
|---|--------------------------------------------------------------------------------------------------------------------------------------------------------|
| 1 | (mycobacter\$ adj3 (atypical or kansas\$ or malmoense or xenop\$ or ab?cessus or massiliense or bolleti\$ or avium or intracellulare or chim?era)).tw. |
| 2 | (Mycobacter\$ and (MOTT or NTM or MAC or MAIC)).tw.                                                                                                    |
| 3 | (nontubercul\$ or non-tubercul\$).tw.                                                                                                                  |
| 4 | 1 or 2 or 3                                                                                                                                            |
| 5 | remove duplicates from 4                                                                                                                               |

MEDLINE – Medical Literature Analysis and Retrieval System Online

EMBASE – Excerpta Medica Database

CCTR – Cochrane Central Register of Controlled Trials

DARE – Database of Abstracts of Reviews of Effects

CLHTA – Health Technology Assessment

CLEED – National Health Services Economic Evaluation Database

Figure E1. PRISMA diagram of studies included and excluded for pulmonary NTM treatment guideline.

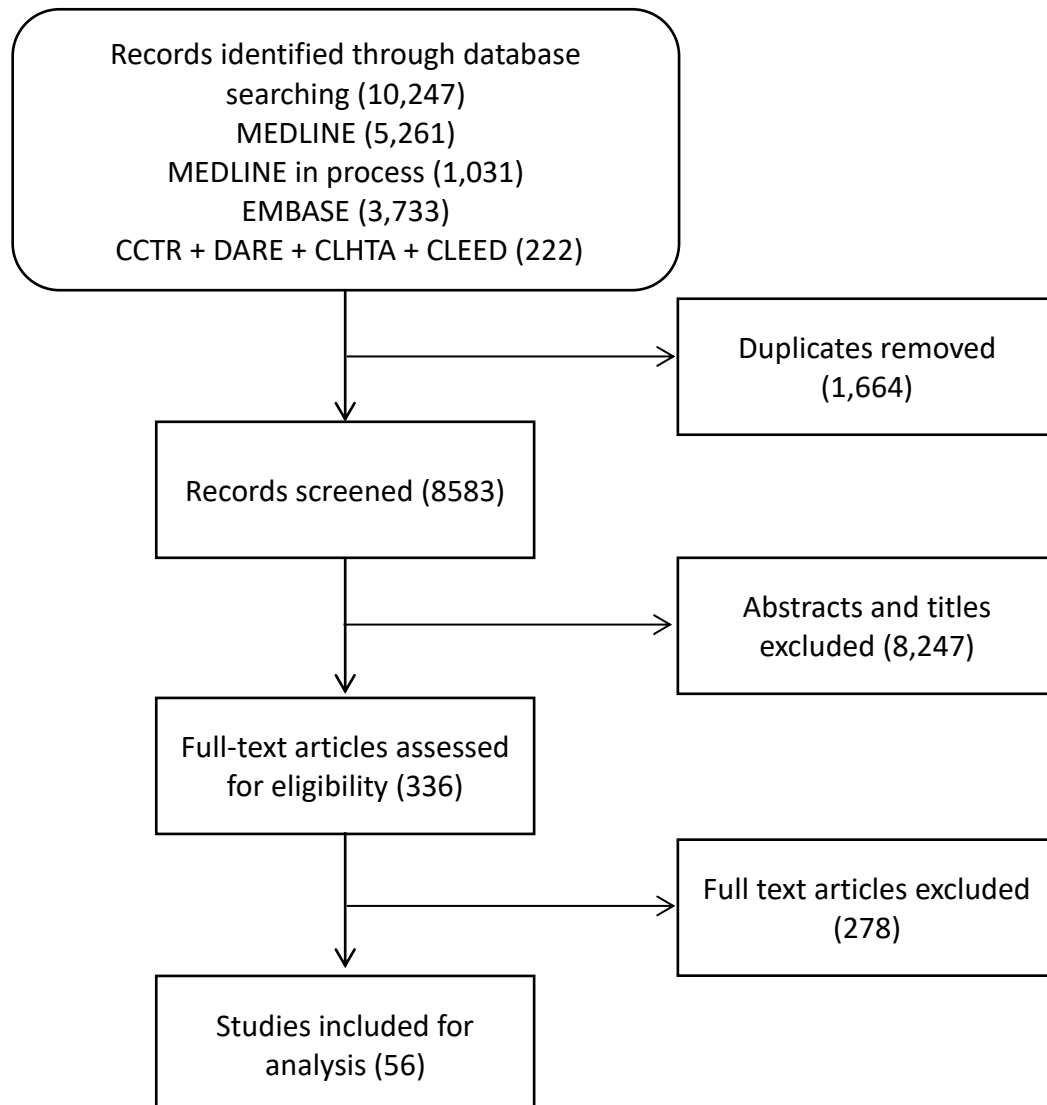

Figure E2: Inclusion and exclusion criteria for full text articles reviewed for pulmonary NTM treatment guideline.

| Criteria for exclusion                                                         |                                                                                                                                                                                                                                                                                                                                                                                                                                                                                                                                                  |
|--------------------------------------------------------------------------------|--------------------------------------------------------------------------------------------------------------------------------------------------------------------------------------------------------------------------------------------------------------------------------------------------------------------------------------------------------------------------------------------------------------------------------------------------------------------------------------------------------------------------------------------------|
| Type of publication                                                            | ANY of the following <ul style="list-style-type: none"> <li><input type="checkbox"/> <b>Review</b> (if systematic review – exclude but keep record of any that you find)</li> <li><input type="checkbox"/> <b>Editorial</b></li> <li><input type="checkbox"/> <b>Letter to editor</b> with <u>no original data</u></li> <li><input type="checkbox"/> <b>Case series</b></li> <li><input type="checkbox"/> <b>Case report</b></li> <li><input type="checkbox"/> <b>Other</b> type of publication (i.e. not a clinical study in humans)</li> </ul> |
| Population                                                                     | ANY of the following <ul style="list-style-type: none"> <li><input type="checkbox"/> Patients <u>without</u> NTM</li> <li><input type="checkbox"/> Patients <u>with</u> tuberculosis</li> <li><input type="checkbox"/> Patients <u>with</u> HIV</li> <li><input type="checkbox"/> Patients <u>with</u> cystic fibrosis</li> <li><input type="checkbox"/> Pediatric patients</li> </ul>                                                                                                                                                           |
|                                                                                | ANY of the following <ul style="list-style-type: none"> <li><input type="checkbox"/> <b>No pharmacological treatment</b> (i.e. no drug used)</li> <li><input type="checkbox"/> <b>NTM prevention or prophylaxis</b></li> </ul>                                                                                                                                                                                                                                                                                                                   |
| Criteria for inclusion (at least one criterion in each category has to be met) |                                                                                                                                                                                                                                                                                                                                                                                                                                                                                                                                                  |
| Study design                                                                   | <ul style="list-style-type: none"> <li><input type="checkbox"/> <b>Randomized trial</b></li> <li><input type="checkbox"/> <b>Observational study</b> with a control group (e.g. cohort, before-after, etc.)</li> <li><input type="checkbox"/> <b>Retrospective review</b></li> </ul>                                                                                                                                                                                                                                                             |
| Population                                                                     | <input type="checkbox"/> Adult patients <b>with NTM</b>                                                                                                                                                                                                                                                                                                                                                                                                                                                                                          |

|              |                                                                                                                            |
|--------------|----------------------------------------------------------------------------------------------------------------------------|
| Intervention | ANY of the following                                                                                                       |
|              | <input type="checkbox"/> <b>pharmacological treatment</b> (drug regimen) being the <u>only</u> treatment in $\geq 1$ group |
|              | <input type="checkbox"/> <b>surgical treatment</b> in $\geq 1$ group                                                       |

**DECISION**

☐ **TO BE INCLUDED**

NOTE: ALL INCLUDED STUDIES WILL NEED TO BE FURTHER SCREENED IF THE REGIMENS USED WERE THE SAME AS THOSE SPECIFIED AS OF INTEREST FOR THESE GUIDELINES.

☐ FURTHER ACTION REQUIRED

What action:

☐ **TO BE EXCLUDED**

Additional comments:

## EVIDENCE TABLES (Tables E3.1-22)

**Table E3.1.** Question 1: Should patients with NTM pulmonary disease be treated with antimicrobial therapy or followed for evidence of progression (“watchful waiting”)?

| Quality assessment |                       |                      |                      |              |                      |                      | № of patients  |                  | Effect                 |                                                   | Quality               | Importance |
|--------------------|-----------------------|----------------------|----------------------|--------------|----------------------|----------------------|----------------|------------------|------------------------|---------------------------------------------------|-----------------------|------------|
| № of studies       | Study design          | Risk of bias         | Inconsistency        | Indirectness | Imprecision          | Other considerations | any treatment  | watchful waiting | Relative (95% CI)      | Absolute (95% CI)                                 |                       |            |
| Cure of NTM        |                       |                      |                      |              |                      |                      |                |                  |                        |                                                   |                       |            |
| 2                  | observational studies | serious <sup>1</sup> | not serious          | not serious  | serious <sup>2</sup> | none                 | 43/71 (60.6%)  | 8/23 (34.8%)     | RR 2.03 (0.44 to 9.30) | 358 more per 1,000 (from 195 fewer to 1,000 more) | ⊕○○○<br>○<br>VERY LOW | CRITICAL   |
| Death              |                       |                      |                      |              |                      |                      |                |                  |                        |                                                   |                       |            |
| 5                  | observational studies | serious <sup>1</sup> | not serious          | not serious  | not serious          | none                 | 90/252 (35.7%) | 85/186 (45.7%)   | RR 0.77 (0.64 to 0.92) | 105 fewer per 1,000 (from 37 fewer to 165 fewer)  | ⊕○○○<br>○<br>VERY LOW | CRITICAL   |
| Culture Conversion |                       |                      |                      |              |                      |                      |                |                  |                        |                                                   |                       |            |
| 2                  | observational studies | serious <sup>1</sup> | serious <sup>3</sup> | not serious  | serious <sup>2</sup> | none                 | 43/75 (57.3%)  | 47/93 (50.5%)    | RR 1.41 (0.50 to 4.02) | 207 more per 1,000 (from 253 fewer to 1,000 more) | ⊕○○○<br>○<br>VERY LOW | CRITICAL   |
| Any adverse effect |                       |                      |                      |              |                      |                      |                |                  |                        |                                                   |                       |            |

| Quality assessment                                  |                       |                      |               |              |             |                      | № of patients                                                                                                                                                                                                                     |                  | Effect            |                   | Quality              | Importance |
|-----------------------------------------------------|-----------------------|----------------------|---------------|--------------|-------------|----------------------|-----------------------------------------------------------------------------------------------------------------------------------------------------------------------------------------------------------------------------------|------------------|-------------------|-------------------|----------------------|------------|
| № of studies                                        | Study design          | Risk of bias         | Inconsistency | Indirectness | Imprecision | Other considerations | any treatment                                                                                                                                                                                                                     | watchful waiting | Relative (95% CI) | Absolute (95% CI) |                      |            |
| 2                                                   | observational studies | serious <sup>1</sup> | not serious   | not serious  | not serious | none                 | A total of 43 out of 100 patients in the treatment group had adverse effects. In neither study was it specified if there were any adverse effects in the watchful waiting group (of 67 patients), but presumedly there were none. |                  |                   |                   | ⊕○○<br>○<br>VERY LOW | IMPORTANT  |
| Quality of Life - not measured                      |                       |                      |               |              |             |                      |                                                                                                                                                                                                                                   |                  |                   |                   |                      |            |
| -                                                   | -                     | -                    | -             | -            | -           | -                    | -                                                                                                                                                                                                                                 | -                | -                 | -                 | -                    | CRITICAL   |
| Recurrence - not measured                           |                       |                      |               |              |             |                      |                                                                                                                                                                                                                                   |                  |                   |                   |                      |            |
| -                                                   | -                     | -                    | -             | -            | -           | -                    | -                                                                                                                                                                                                                                 | -                | -                 | -                 | -                    | CRITICAL   |
| Development of antibiotic resistance - not measured |                       |                      |               |              |             |                      |                                                                                                                                                                                                                                   |                  |                   |                   |                      |            |
| -                                                   | -                     | -                    | -             | -            | -           | -                    | -                                                                                                                                                                                                                                 | -                | -                 | -                 | -                    | CRITICAL   |

**CI:** Confidence interval; **RR:** Risk ratio

1. Observational studies, risk treatment group had more serious disease
2. wide range in confidence interval
3. Non overlapping confidence intervals between studies



**Table E3.2.** Question II: Should patients with NTM pulmonary disease be treated empirically or based on in-vitro drug susceptibility results?

| Quality assessment                                  |                       |                      |               |                      |             |                      | № of patients                                                                                  |                                | Effect            |                   | Quality  | Importance |
|-----------------------------------------------------|-----------------------|----------------------|---------------|----------------------|-------------|----------------------|------------------------------------------------------------------------------------------------|--------------------------------|-------------------|-------------------|----------|------------|
| № of studies                                        | Study design          | Risk of bias         | Inconsistency | Indirectness         | Imprecision | Other considerations | empiric treatment                                                                              | susceptibility-based treatment | Relative (95% CI) | Absolute (95% CI) |          |            |
| Quality of Life - not measured                      |                       |                      |               |                      |             |                      |                                                                                                |                                |                   |                   |          |            |
| -                                                   | -                     | -                    | -             | -                    | -           | -                    | -                                                                                              | -                              | -                 | -                 | -        | CRITICAL   |
| Cure of NTM Disease - not reported                  |                       |                      |               |                      |             |                      |                                                                                                |                                |                   |                   |          |            |
| -                                                   | -                     | -                    | -             | -                    | -           | -                    | -                                                                                              | -                              | -                 | -                 | -        | CRITICAL   |
| Death                                               |                       |                      |               |                      |             |                      |                                                                                                |                                |                   |                   |          |            |
| 1                                                   | observational studies | serious <sup>1</sup> | not serious   | serious <sup>2</sup> | not serious | none                 | Authors report no significant difference between empiric vs culture-based regimens (80 vs 75%) |                                |                   | ⊕○○○<br>VERY LOW  | CRITICAL |            |
| Development of antibiotic resistance - not measured |                       |                      |               |                      |             |                      |                                                                                                |                                |                   |                   |          |            |
| -                                                   | -                     | -                    | -             | -                    | -           | -                    | -                                                                                              | -                              | -                 | -                 | -        | CRITICAL   |
| Recurrence - not measured                           |                       |                      |               |                      |             |                      |                                                                                                |                                |                   |                   |          |            |
| -                                                   | -                     | -                    | -             | -                    | -           | -                    | -                                                                                              | -                              | -                 | -                 | -        | CRITICAL   |
| Culture Conversion - not reported                   |                       |                      |               |                      |             |                      |                                                                                                |                                |                   |                   |          |            |

| Quality assessment |              |              |               |              |             |                      | № of patients     |                                | Effect            |                   | Quality | Importance |
|--------------------|--------------|--------------|---------------|--------------|-------------|----------------------|-------------------|--------------------------------|-------------------|-------------------|---------|------------|
| № of studies       | Study design | Risk of bias | Inconsistency | Indirectness | Imprecision | Other considerations | empiric treatment | susceptibility-based treatment | Relative (95% CI) | Absolute (95% CI) |         |            |
| -                  | -            | -            | -             | -            | -           | -                    | -                 | -                              | -                 | -                 | -       | CRITICAL   |

**CI:** Confidence interval

1. No randomization, no concealment
2. Study used old 1997 ATS criteria

**Table E3.3. Question III:** Should macrolide-susceptible MAC pulmonary disease be treated with a three-drug regimen with a macrolide or without a macrolide?

| Quality assessment   |                       |              |               |              |                      |                      | № of patients                |                                 | Effect                    |                                                    | Quality          | Importance |
|----------------------|-----------------------|--------------|---------------|--------------|----------------------|----------------------|------------------------------|---------------------------------|---------------------------|----------------------------------------------------|------------------|------------|
| № of studies         | Study design          | Risk of bias | Inconsistency | Indirectness | Imprecision          | Other considerations | three drugs with a macrolide | three drugs without a macrolide | Relative (95% CI)         | Absolute (95% CI)                                  |                  |            |
| Cure of NTM          |                       |              |               |              |                      |                      |                              |                                 |                           |                                                    |                  |            |
| 2                    | observational studies | not serious  | not serious   | not serious  | serious <sup>a</sup> | none                 | 31/94 (33.0%)                | 34/96 (35.4%)                   | RR 0.93<br>(0.62 to 1.37) | 25 fewer per 1,000<br>(from 131 more to 135 fewer) | ⊕○○○<br>VERY LOW | CRITICAL   |
| Death                |                       |              |               |              |                      |                      |                              |                                 |                           |                                                    |                  |            |
| 1                    | observational studies | not serious  | not serious   | not serious  | serious <sup>a</sup> | none                 | 40/83 (48.2%)                | 26/87 (29.9%)                   | RR 1.61<br>(1.09 to 2.39) | 182 more per 1,000<br>(from 27 more to 415 more)   | ⊕○○○<br>VERY LOW | CRITICAL   |
| Recurrence (relapse) |                       |              |               |              |                      |                      |                              |                                 |                           |                                                    |                  |            |
| 2                    | observational studies | not serious  | not serious   | not serious  | serious <sup>a</sup> | none                 | 9/94 (9.6%)                  | 10/96 (10.4%)                   | RR 0.87<br>(0.37 to 2.01) | 14 fewer per 1,000<br>(from 66 fewer to 105 more)  | ⊕○○○<br>VERY LOW | CRITICAL   |
| Culture conversion   |                       |              |               |              |                      |                      |                              |                                 |                           |                                                    |                  |            |

| Quality assessment                 |                       |              |                      |              |                      |                      | № of patients                |                                 | Effect                 |                                                  | Quality          | Importance |
|------------------------------------|-----------------------|--------------|----------------------|--------------|----------------------|----------------------|------------------------------|---------------------------------|------------------------|--------------------------------------------------|------------------|------------|
| № of studies                       | Study design          | Risk of bias | Inconsistency        | Indirectness | Imprecision          | Other considerations | three drugs with a macrolide | three drugs without a macrolide | Relative (95% CI)      | Absolute (95% CI)                                |                  |            |
| 2                                  | observational studies | not serious  | serious <sup>b</sup> | not serious  | serious <sup>a</sup> | none                 | 88/97 (90.7%)                | 85/100 (85.0%)                  | RR 0.98 (0.67 to 1.43) | 17 fewer per 1,000 (from 281 fewer to 365 more)  | ⊕○○○<br>VERY LOW | CRITICAL   |
| Any adverse effect                 |                       |              |                      |              |                      |                      |                              |                                 |                        |                                                  |                  |            |
| 1                                  | randomised trials     | not serious  | not serious          | not serious  | serious <sup>a</sup> | none                 | 1/14 (7.1%)                  | 4/13 (30.8%)                    | RR 0.23 (0.03 to 1.82) | 237 fewer per 1,000 (from 252 more to 298 fewer) | ⊕⊕○○<br>LOW      | CRITICAL   |
| Serious adverse effect             |                       |              |                      |              |                      |                      |                              |                                 |                        |                                                  |                  |            |
| 1                                  | randomised trials     | not serious  | not serious          | not serious  | serious <sup>a</sup> | none                 | 0/14 (0.0%)                  | 0/13 (0.0%)                     | not estimable          |                                                  | ⊕⊕○○<br>LOW      | CRITICAL   |
| Withdrawal owing to adverse effect |                       |              |                      |              |                      |                      |                              |                                 |                        |                                                  |                  |            |
| 1                                  | randomised trials     | not serious  | not serious          | not serious  | not serious          | none                 | 1/14 (7.1%)                  | 2/13 (15.4%)                    | RR 0.46 (0.05 to 4.53) | 83 fewer per 1,000 (from 146 fewer to 543 more)  | ⊕⊕○○<br>LOW      | CRITICAL   |
| Quality of Life - not measured     |                       |              |                      |              |                      |                      |                              |                                 |                        |                                                  |                  |            |

| Quality assessment |              |              |               |              |             |                      | № of patients                |                                 | Effect            |                   | Quality | Importance |
|--------------------|--------------|--------------|---------------|--------------|-------------|----------------------|------------------------------|---------------------------------|-------------------|-------------------|---------|------------|
| № of studies       | Study design | Risk of bias | Inconsistency | Indirectness | Imprecision | Other considerations | three drugs with a macrolide | three drugs without a macrolide | Relative (95% CI) | Absolute (95% CI) |         |            |
| -                  | -            | -            | -             | -            | -           | -                    | -                            | -                               | -                 | -                 | -       | CRITICAL   |

**CI:** Confidence interval; **RR:** Risk ratio

a. Wide confidence interval

b. One study favors w/ macrolide and one favors w/o

**Table E3.4. Question IV:** In patients with newly diagnosed macrolide susceptible MAC pulmonary disease, should an azithromycin-based regimen or a clarithromycin-based regimen be used?

| Quality assessment                                                     |                       |                      |               |              |                      |                      | № of patients              |                              | Effect                 |                                            | Quality          | Importance |
|------------------------------------------------------------------------|-----------------------|----------------------|---------------|--------------|----------------------|----------------------|----------------------------|------------------------------|------------------------|--------------------------------------------|------------------|------------|
| № of studies                                                           | Study design          | Risk of bias         | Inconsistency | Indirectness | Imprecision          | Other considerations | azithromycin-based regimen | clarithromycin-based regimen | Relative (95% CI)      | Absolute (95% CI)                          |                  |            |
| Death - not reported                                                   |                       |                      |               |              |                      |                      |                            |                              |                        |                                            |                  |            |
| -                                                                      | -                     | -                    | -             | -            | -                    | -                    | -                          | -                            | -                      | -                                          | -                | CRITICAL   |
| Quality of life - not measured                                         |                       |                      |               |              |                      |                      |                            |                              |                        |                                            |                  |            |
| -                                                                      | -                     | -                    | -             | -            | -                    | -                    | -                          | -                            | -                      | -                                          | -                | CRITICAL   |
| Culture Conversion (follow up: range 4 to 12 months)                   |                       |                      |               |              |                      |                      |                            |                              |                        |                                            |                  |            |
| 4                                                                      | observational studies | serious <sup>1</sup> | not serious   | not serious  | serious <sup>2</sup> | none                 | 131/178 (73.6%)            | 156/190 (82.1%)              | RR 0.88 (0.73 to 1.05) | 10 fewer per 100 (from 4 more to 22 fewer) | ⊕○○○<br>VERY LOW | CRITICAL   |
| Recurrence (relapse) - not measured                                    |                       |                      |               |              |                      |                      |                            |                              |                        |                                            |                  |            |
| -                                                                      | -                     | -                    | -             | -            | -                    | -                    | -                          | -                            | -                      | -                                          | -                | CRITICAL   |
| Development of antibiotic resistance (follow up: range 4 to 12 months) |                       |                      |               |              |                      |                      |                            |                              |                        |                                            |                  |            |

| Quality assessment                                                |                       |                      |               |              |                      |                      | № of patients              |                              | Effect                              |                                            | Quality          | Importance |
|-------------------------------------------------------------------|-----------------------|----------------------|---------------|--------------|----------------------|----------------------|----------------------------|------------------------------|-------------------------------------|--------------------------------------------|------------------|------------|
| № of studies                                                      | Study design          | Risk of bias         | Inconsistency | Indirectness | Imprecision          | Other considerations | azithromycin-based regimen | clarithromycin-based regimen | Relative (95% CI)                   | Absolute (95% CI)                          |                  |            |
| 3                                                                 | observational studies | serious <sup>1</sup> | not serious   | not serious  | serious <sup>3</sup> | none                 | 4/92 (4.3%)                | 9/97 (9.3%)                  | RR 0.51 (0.07 to 2.79) <sup>4</sup> | 5 fewer per 100 (from 9 fewer to 17 more)  | ⊕○○○<br>VERY LOW | CRITICAL   |
| Serious adverse effects (follow up: 4 months)                     |                       |                      |               |              |                      |                      |                            |                              |                                     |                                            |                  |            |
| 1                                                                 | observational studies | serious <sup>1</sup> | not serious   | not serious  | serious <sup>5</sup> | none                 | 0/29 (0.0%)                | 0/30 (0.0%)                  | not estimable                       | 0 fewer per 100 (from 60 fewer to 60 more) | ⊕○○○<br>VERY LOW | CRITICAL   |
| Withdrawal from study due to AEs (follow up: range 4 to 6 months) |                       |                      |               |              |                      |                      |                            |                              |                                     |                                            |                  |            |
| 3                                                                 | observational studies | serious <sup>1</sup> | not serious   | not serious  | serious <sup>6</sup> | none                 | 12/87 (13.8%)              | 15/104 (14.4%)               | RR 1.02 (0.45 to 2.07)              | 0 fewer per 100 (from 8 fewer to 15 more)  | ⊕○○○<br>VERY LOW | CRITICAL   |
| Any Adverse Effect (follow up: range 4 to 12 months)              |                       |                      |               |              |                      |                      |                            |                              |                                     |                                            |                  |            |

| Quality assessment |                       |                      |                          |              |                      |                      | No of patients             |                              | Effect                 |                                             | Quality          | Importance |
|--------------------|-----------------------|----------------------|--------------------------|--------------|----------------------|----------------------|----------------------------|------------------------------|------------------------|---------------------------------------------|------------------|------------|
| No of studies      | Study design          | Risk of bias         | Inconsistency            | Indirectness | Imprecision          | Other considerations | azithromycin-based regimen | clarithromycin-based regimen | Relative (95% CI)      | Absolute (95% CI)                           |                  |            |
| 6                  | observational studies | serious <sup>1</sup> | not serious <sup>7</sup> | not serious  | serious <sup>8</sup> | none                 | 64/215 (29.8%)             | 109/268 (40.7%)              | RR 0.75 (0.44 to 1.28) | 10 fewer per 100 (from 11 more to 23 fewer) | ⊕○○○<br>VERY LOW | CRITICAL   |

**CI:** Confidence interval; **RR:** Risk ratio; **OR:** Odds ratio

1. Studies did not adjust for confounders in the analysis
2. Confidence interval does not exclude an appreciable benefit with azithromycin or no difference
3. Only 14 events
4. Based on unadjusted OR of 0.44 (0.06 to 3.41)
5. Only 59 patients
6. Only 27 events; Confidence interval does not exclude an appreciable benefit with either intervention
7. There was statistical heterogeneity and CIs of some studies did not overlap; however, if one study that was an outlier was excluded from analysis it did not change the results (RR 0.94; 95% CI: 0.68 to 1.29)
8. Confidence interval does not exclude an appreciable benefit with either intervention



**Table E3.5. Question V:** Should patients with macrolide susceptible MAC pulmonary disease be treated with a parenteral amikacin or streptomycin-containing regimen or without a parenteral amikacin or streptomycin-containing regimen?

| Quality assessment         |                   |              |               |              |                      |                      | № of patients                               |                                                | Effect                 |                                                 | Quality       | Importance |
|----------------------------|-------------------|--------------|---------------|--------------|----------------------|----------------------|---------------------------------------------|------------------------------------------------|------------------------|-------------------------------------------------|---------------|------------|
| № of studies               | Study design      | Risk of bias | Inconsistency | Indirectness | Imprecision          | Other considerations | a treatment regimen with a parenteral agent | a treatment regimen without a parenteral agent | Relative (95% CI)      | Absolute (95% CI)                               |               |            |
| Cure of NTM - not measured |                   |              |               |              |                      |                      |                                             |                                                |                        |                                                 |               |            |
| -                          | -                 | -            | -             | -            | -                    | -                    | -                                           | -                                              | -                      | -                                               | -             | CRITICAL   |
| Death                      |                   |              |               |              |                      |                      |                                             |                                                |                        |                                                 |               |            |
| 1                          | randomised trials | not serious  | not serious   | not serious  | serious <sup>3</sup> | none                 | 2/73 (2.7%)                                 | 2/73 (2.7%)                                    | RR 1.00 (0.14 to 6.91) | 0 fewer per 1,000 (from 24 fewer to 162 more)   | ⊕⊕⊕○ MODERATE | CRITICAL   |
| Recurrence (relapse)       |                   |              |               |              |                      |                      |                                             |                                                |                        |                                                 |               |            |
| 1                          | randomised trials | not serious  | not serious   | not serious  | serious              | none                 | 16/52 (30.8%)                               | 13/37 (35.1%)                                  | RR 0.88 (0.48 to 1.59) | 42 fewer per 1,000 (from 183 fewer to 207 more) | ⊕⊕⊕○ MODERATE | CRITICAL   |
| Culture Conversion         |                   |              |               |              |                      |                      |                                             |                                                |                        |                                                 |               |            |



| Quality assessment                                  |              |              |               |              |             |                      | № of patients                               |                                                | Effect            |                   | Quality | Importance |
|-----------------------------------------------------|--------------|--------------|---------------|--------------|-------------|----------------------|---------------------------------------------|------------------------------------------------|-------------------|-------------------|---------|------------|
| № of studies                                        | Study design | Risk of bias | Inconsistency | Indirectness | Imprecision | Other considerations | a treatment regimen with a parenteral agent | a treatment regimen without a parenteral agent | Relative (95% CI) | Absolute (95% CI) |         |            |
| Development of antibiotic resistance - not measured |              |              |               |              |             |                      |                                             |                                                |                   |                   |         |            |
| -                                                   | -            | -            | -             | -            | -           | -                    | -                                           | -                                              | -                 | -                 | -       | CRITICAL   |

**CI:** Confidence interval; **RR:** Risk ratio

1. No control for confounders
2. Drug regimens among patients varied widely, both with/without macrolide
3. Wide confidence interval

**Table E3.6. Question VI:** In patients with macrolide-susceptible MAC pulmonary disease, should a regimen with inhaled amikacin or a regimen without inhaled amikacin be used for treatment?

| Quality assessment   |                       |                      |                      |              |             |                      | № of patients                      |                                       | Effect            |                   | Quality          | Importance |
|----------------------|-----------------------|----------------------|----------------------|--------------|-------------|----------------------|------------------------------------|---------------------------------------|-------------------|-------------------|------------------|------------|
| № of studies         | Study design          | Risk of bias         | Inconsistency        | Indirectness | Imprecision | Other considerations | a regimen with inhaled antibiotics | a regimen without inhaled antibiotics | Relative (95% CI) | Absolute (95% CI) |                  |            |
| Cure of NTM          |                       |                      |                      |              |             |                      |                                    |                                       |                   |                   |                  |            |
| 1                    | observational studies | serious <sup>a</sup> | not serious          | not serious  | not serious | none                 | 3/3 (100.0%)                       | -                                     | -                 | -                 | ⊕○○○<br>VERY LOW | CRITICAL   |
| Death                |                       |                      |                      |              |             |                      |                                    |                                       |                   |                   |                  |            |
| 2                    | observational studies | serious <sup>a</sup> | not serious          | not serious  | not serious | none                 | 2/9 (22.2%)                        | not pooled                            | not pooled        | see comment       | ⊕○○○<br>VERY LOW | CRITICAL   |
| Recurrence (relapse) |                       |                      |                      |              |             |                      |                                    |                                       |                   |                   |                  |            |
| 3                    | randomised trials     | serious              | not serious          | not serious  | not serious | none                 | 9/21 (42.9%)                       | 0/0                                   | not pooled        | see comment       | ⊕⊕⊕○<br>MODERATE | CRITICAL   |
| Culture Conversion   |                       |                      |                      |              |             |                      |                                    |                                       |                   |                   |                  |            |
| 3                    | randomised trials     | serious <sup>b</sup> | serious <sup>c</sup> | not serious  | not serious | none                 | 16/40 (40.0%)                      | 1/28 (3.6%)                           | not pooled        | see comment       | ⊕⊕○○<br>LOW      | CRITICAL   |
| Any Adverse Effect   |                       |                      |                      |              |             |                      |                                    |                                       |                   |                   |                  |            |

| Quality assessment                   |                   |                      |                      |                      |             |                      | № of patients                                                                                                                                                                                                                    |                                       | Effect            |                   | Quality          | Importance |
|--------------------------------------|-------------------|----------------------|----------------------|----------------------|-------------|----------------------|----------------------------------------------------------------------------------------------------------------------------------------------------------------------------------------------------------------------------------|---------------------------------------|-------------------|-------------------|------------------|------------|
| № of studies                         | Study design      | Risk of bias         | Inconsistency        | Indirectness         | Imprecision | Other considerations | a regimen with inhaled antibiotics                                                                                                                                                                                               | a regimen without inhaled antibiotics | Relative (95% CI) | Absolute (95% CI) |                  |            |
| 3                                    | randomised trials | serious <sup>b</sup> | serious <sup>d</sup> | not serious          | not serious | none                 | 46/59 (78.0%)                                                                                                                                                                                                                    | 40/45 (88.9%)                         | not pooled        | see comment       | ⊕⊕○○<br>LOW      | CRITICAL   |
| Serious Adverse Effect               |                   |                      |                      |                      |             |                      |                                                                                                                                                                                                                                  |                                       |                   |                   |                  |            |
| 3                                    | randomised trials | serious <sup>b</sup> | serious <sup>e</sup> | not serious          | not serious | none                 | 8/59 (13.6%)                                                                                                                                                                                                                     | 4/45 (8.9%)                           | not pooled        | see comment       | ⊕⊕○○<br>LOW      | CRITICAL   |
| Withdrawal owing to adverse effects  |                   |                      |                      |                      |             |                      |                                                                                                                                                                                                                                  |                                       |                   |                   |                  |            |
| 4                                    | randomised trials | serious <sup>b</sup> | serious <sup>f</sup> | not serious          | not serious | none                 | 15/79 (19.0%)                                                                                                                                                                                                                    | 0/45 (0.0%)                           | not pooled        | see comment       | ⊕⊕○○<br>LOW      | CRITICAL   |
| Quality of Life                      |                   |                      |                      |                      |             |                      |                                                                                                                                                                                                                                  |                                       |                   |                   |                  |            |
| 1                                    | randomised trials | not serious          | not serious          | serious <sup>g</sup> | not serious | none                 | Study used Quality of Life - Bronchiectasis - Nontuberculous Mycobacteria Module scores with no significant difference (p=0.204) between the inhaled antibiotic group (-7.9 [14.2], n=36) and placebo group (-2.8 [13.7], n=36). |                                       |                   |                   | ⊕⊕⊕○<br>MODERATE | CRITICAL   |
| Development of Antibiotic Resistance |                   |                      |                      |                      |             |                      |                                                                                                                                                                                                                                  |                                       |                   |                   |                  |            |

| Quality assessment |                   |              |               |                      |             |                      | No of patients                     |                                       | Effect            |                   | Quality          | Importance |
|--------------------|-------------------|--------------|---------------|----------------------|-------------|----------------------|------------------------------------|---------------------------------------|-------------------|-------------------|------------------|------------|
| No of studies      | Study design      | Risk of bias | Inconsistency | Indirectness         | Imprecision | Other considerations | a regimen with inhaled antibiotics | a regimen without inhaled antibiotics | Relative (95% CI) | Absolute (95% CI) |                  |            |
| 1                  | randomised trials | not serious  | not serious   | serious <sup>g</sup> | not serious | none                 | 3/44 (6.8%)                        | 2/45 (4.4%)                           | not estimable     |                   | ⊕⊕⊕○<br>MODERATE | CRITICAL   |

**CI:** Confidence interval; **RR:** Risk ratio; **OR:** Odds ratio

- a. Studies were case series without a control group
- b. Included 2 case series without a control group
- c. Conversion with inhaled antibiotics ranged from 30% to 80%
- d. Adverse effects ranged from 30% in case series to over 90% in RCT
- e. Ranged from 0% in case series to nearly 20% in RCT
- f. Ranged from 0% to 35% in inhaled group.
- g. Included both MAC and M abscessus

**Table E3.7. Question VII:** In patients with macrolide-susceptible MAC pulmonary disease, should a three drug regimen or a two drug regimen be used for treatment?

| Quality assessment                 |                   |                      |               |              |                      |                      | № of patients        |                    | Effect                 |                                                 | Quality       | Importance |
|------------------------------------|-------------------|----------------------|---------------|--------------|----------------------|----------------------|----------------------|--------------------|------------------------|-------------------------------------------------|---------------|------------|
| № of studies                       | Study design      | Risk of bias         | Inconsistency | Indirectness | Imprecision          | Other considerations | a three drug regimen | a two trug regimen | Relative (95% CI)      | Absolute (95% CI)                               |               |            |
| Culture Conversion                 |                   |                      |               |              |                      |                      |                      |                    |                        |                                                 |               |            |
| 1                                  | randomised trials | serious <sup>1</sup> | not serious   | not serious  | serious <sup>2</sup> | none                 | 24/59 (40.7%)        | 33/60 (55.0%)      | RR 0.74 (0.50 to 1.09) | 143 fewer per 1,000 (from 50 more to 275 fewer) | ⊕⊕○○ LOW      | CRITICAL   |
| Serious Adverse Effects            |                   |                      |               |              |                      |                      |                      |                    |                        |                                                 |               |            |
| 1                                  | randomised trials | serious <sup>1</sup> | not serious   | not serious  | not serious          | none                 | 0/59 (0.0%)          | 0/60 (0.0%)        | not estimable          |                                                 | ⊕⊕⊕○ MODERATE | CRITICAL   |
| Withdrawal owing to adverse effect |                   |                      |               |              |                      |                      |                      |                    |                        |                                                 |               |            |
| 1                                  | randomised trials | serious <sup>1</sup> | not serious   | not serious  | serious <sup>2</sup> |                      | 22/59 (37.3%)        | 16/60 (26.7%)      | RR 1.40 (0.80 to 2.12) | 107 more per 1,000 (from 53 fewer to 299 more)  | -             | CRITICAL   |
| Quality of Life - not measured     |                   |                      |               |              |                      |                      |                      |                    |                        |                                                 |               |            |
| -                                  | -                 | -                    | -             | -            | -                    | -                    | -                    | -                  | -                      | -                                               | -             | CRITICAL   |
| Cure of NTM Disease - not measured |                   |                      |               |              |                      |                      |                      |                    |                        |                                                 |               |            |

| Quality assessment                                  |              |              |               |              |             |                      | № of patients        |                    | Effect            |                   | Quality | Importance |
|-----------------------------------------------------|--------------|--------------|---------------|--------------|-------------|----------------------|----------------------|--------------------|-------------------|-------------------|---------|------------|
| № of studies                                        | Study design | Risk of bias | Inconsistency | Indirectness | Imprecision | Other considerations | a three drug regimen | a two trug regimen | Relative (95% CI) | Absolute (95% CI) |         |            |
| -                                                   | -            | -            | -             | -            | -           | -                    | -                    | -                  | -                 | -                 | -       | CRITICAL   |
| Death - not reported                                |              |              |               |              |             |                      |                      |                    |                   |                   |         |            |
| -                                                   | -            | -            | -             | -            | -           | -                    | -                    | -                  | -                 | -                 | -       | CRITICAL   |
| Development of antibiotic resistance - not reported |              |              |               |              |             |                      |                      |                    |                   |                   |         |            |
| -                                                   | -            | -            | -             | -            | -           | -                    | -                    | -                  | -                 | -                 | -       | CRITICAL   |
| Recurrence (relapse) - not measured                 |              |              |               |              |             |                      |                      |                    |                   |                   |         |            |
| -                                                   | -            | -            | -             | -            | -           | -                    | -                    | -                  | -                 | -                 | -       | CRITICAL   |

**CI:** Confidence interval; **RR:** Risk ratio

1. not blinded, no concealment
2. wide confidence interval



**Table E3.8. Question VIII:** In patients with macrolide susceptible MAC pulmonary disease, should a daily or an intermittent macrolide-based regimen be used for treatment?

| Quality assessment                                   |                       |                      |               |                          |             |                      | No of patients                                 |                               | Effect                                        |                                                      | Quality          | Importance |
|------------------------------------------------------|-----------------------|----------------------|---------------|--------------------------|-------------|----------------------|------------------------------------------------|-------------------------------|-----------------------------------------------|------------------------------------------------------|------------------|------------|
| No of studies                                        | Study design          | Risk of bias         | Inconsistency | Indirectness             | Imprecision | Other considerations | a three times per week macrolide-based regimen | daily macrolide-based regimen | Relative (95% CI)                             | Absolute (95% CI)                                    |                  |            |
| Death - not reported                                 |                       |                      |               |                          |             |                      |                                                |                               |                                               |                                                      |                  |            |
| -                                                    | -                     | -                    | -             | -                        | -           | -                    | -                                              | -                             | -                                             | -                                                    | -                | CRITICAL   |
| Quality of life - not measured                       |                       |                      |               |                          |             |                      |                                                |                               |                                               |                                                      |                  |            |
| -                                                    | -                     | -                    | -             | -                        | -           | -                    | -                                              | -                             | -                                             | -                                                    | -                | CRITICAL   |
| Cure of NTM Disease (follow up: 12 months)           |                       |                      |               |                          |             |                      |                                                |                               |                                               |                                                      |                  |            |
| 1                                                    | observational studies | serious <sup>1</sup> | not serious   | not serious <sup>2</sup> | not serious | none                 | 79/118 (66.9%)                                 | 75/99 (75.8%)                 | <b>RR 0.97</b><br>(0.72 to 1.14) <sup>3</sup> | <b>2 fewer per 100</b><br>(from 11 more to 21 fewer) | ⊕○○○<br>VERY LOW | CRITICAL   |
| Culture Conversion (follow up: range 6 to 12 months) |                       |                      |               |                          |             |                      |                                                |                               |                                               |                                                      |                  |            |



| Quality assessment                                                                                |                       |                          |                          |              |                      |                      | № of patients                                  |                               | Effect                 |                                             | Quality          | Importance |
|---------------------------------------------------------------------------------------------------|-----------------------|--------------------------|--------------------------|--------------|----------------------|----------------------|------------------------------------------------|-------------------------------|------------------------|---------------------------------------------|------------------|------------|
| № of studies                                                                                      | Study design          | Risk of bias             | Inconsistency            | Indirectness | Imprecision          | Other considerations | a three times per week macrolide-based regimen | daily macrolide-based regimen | Relative (95% CI)      | Absolute (95% CI)                           |                  |            |
| Discontinuation of the initial treatment due to adverse effects (follow up: range 6 to 12 months) |                       |                          |                          |              |                      |                      |                                                |                               |                        |                                             |                  |            |
| 4                                                                                                 | observational studies | not serious <sup>1</sup> | not serious <sup>7</sup> | not serious  | serious <sup>8</sup> | none                 | 28/362 (7.7%)                                  | 45/202 (22.3%)                | RR 0.44 (0.09 to 2.16) | 12 fewer per 100 (from 20 fewer to 26 more) | ⊕○○○<br>VERY LOW | IMPORTANT  |
| Adverse Effects (follow up: range 6 to 12 months)                                                 |                       |                          |                          |              |                      |                      |                                                |                               |                        |                                             |                  |            |
| 4                                                                                                 | observational studies | not serious <sup>1</sup> | not serious              | not serious  | serious <sup>8</sup> | none                 | 66/259 (25.5%)                                 | 72/186 (38.7%)                | RR 0.63 (0.25 to 1.55) | 14 fewer per 100 (from 21 more to 29 fewer) | ⊕○○○<br>VERY LOW | IMPORTANT  |

**CI:** Confidence interval; **RR:** Risk ratio

1. Studies did not adjust for confounders in analysis
2. None of the patients had cavitory disease which would make the information indirect for that population.
3. Based on adjusted OR of 0.891 (0.387 to 2.050)
4. Some studies included only patients without cavitory disease and some included both cavitory and non-cavitory but did not report the results separately
5. Only 4 events; confidence interval does not exclude an appreciable benefit from either regimen
6. Only 13 events
7. In one study a large proportion of patients did not tolerate daily regimen; if this study was excluded from analysis the result would be 0.85 (0.48 to 1.49)
8. confidence interval does not exclude an appreciable harm from either regimen

**Table E3.9. Question IX:** In patients with macrolide susceptible MAC pulmonary disease, should patients be treated with less than 12 months of treatment after culture negativity or 12 or more months of treatment after culture negativity?

[illegible]

| Quality assessment                                  |              |              |               |              |             |                      | № of patients                                    |                                                    | Effect            |                   | Quality | Importance |
|-----------------------------------------------------|--------------|--------------|---------------|--------------|-------------|----------------------|--------------------------------------------------|----------------------------------------------------|-------------------|-------------------|---------|------------|
| № of studies                                        | Study design | Risk of bias | Inconsistency | Indirectness | Imprecision | Other considerations | <12 months of treatment after culture negativity | >= 12 months of treatment after culture negativity | Relative (95% CI) | Absolute (95% CI) |         |            |
| Development of antibiotic resistance - not measured |              |              |               |              |             |                      |                                                  |                                                    |                   |                   |         |            |
| -                                                   | -            | -            | -             | -            | -           | -                    | -                                                | -                                                  | -                 | -                 | -       | CRITICAL   |
| Death - not reported                                |              |              |               |              |             |                      |                                                  |                                                    |                   |                   |         |            |
| -                                                   | -            | -            | -             | -            | -           | -                    | -                                                | -                                                  | -                 | -                 | -       | CRITICAL   |
| Adverse drug effects - not reported                 |              |              |               |              |             |                      |                                                  |                                                    |                   |                   |         |            |
| -                                                   | -            | -            | -             | -            | -           | -                    | -                                                | -                                                  | -                 | -                 | -       | CRITICAL   |

**CI:** Confidence interval; **RR:** Risk ratio

1. No control for confounding
2. Study compares TID vs daily regimens and this is a secondary analysis of patients unable to tolerate 12 months of therapy for various reasons

**Table E3.10. Question X:** In patients with *M. kansasii* pulmonary disease, should an isoniazid-containing regimen or a macrolide-containing regimen be used for treatment?

| Quality assessment                                  |              |              |               |              |             |                      | № of patients            |                                | Effect            |                   | Quality | Importance |  |
|-----------------------------------------------------|--------------|--------------|---------------|--------------|-------------|----------------------|--------------------------|--------------------------------|-------------------|-------------------|---------|------------|--|
| № of studies                                        | Study design | Risk of bias | Inconsistency | Indirectness | Imprecision | Other considerations | a INH-containing regimen | a macrolide-containing regimen | Relative (95% CI) | Absolute (95% CI) |         |            |  |
| Cure of NTM - not measured                          |              |              |               |              |             |                      |                          |                                |                   |                   |         |            |  |
| -                                                   | -            | -            | -             | -            | -           | -                    | -                        | -                              | -                 | -                 | -       | CRITICAL   |  |
| Death - not measured                                |              |              |               |              |             |                      |                          |                                |                   |                   |         |            |  |
| -                                                   | -            | -            | -             | -            | -           | -                    | -                        | -                              | -                 | -                 | -       | CRITICAL   |  |
| Development of antibiotic resistance – not measured |              |              |               |              |             |                      |                          |                                |                   |                   |         |            |  |
| -                                                   | -            | -            | -             | -            | -           | -                    | -                        | -                              | -                 | -                 | -       | CRITICAL   |  |
| Quality of life - not measured                      |              |              |               |              |             |                      |                          |                                |                   |                   |         |            |  |
| -                                                   | -            | -            | -             | -            | -           | -                    | -                        | -                              | -                 | -                 | -       | CRITICAL   |  |
| Culture conversion - not measured                   |              |              |               |              |             |                      |                          |                                |                   |                   |         |            |  |
| -                                                   | -            | -            | -             | -            | -           | -                    | -                        | -                              | -                 | -                 | -       | CRITICAL   |  |
| Adverse drug effects - not measured                 |              |              |               |              |             |                      |                          |                                |                   |                   |         |            |  |

| Quality assessment                  |              |              |               |              |             |                      | № of patients            |                                | Effect            |                   | Quality | Importance |
|-------------------------------------|--------------|--------------|---------------|--------------|-------------|----------------------|--------------------------|--------------------------------|-------------------|-------------------|---------|------------|
| № of studies                        | Study design | Risk of bias | Inconsistency | Indirectness | Imprecision | Other considerations | a INH-containing regimen | a macrolide-containing regimen | Relative (95% CI) | Absolute (95% CI) |         |            |
| -                                   | -            | -            | -             | -            | -           | -                    | -                        | -                              | -                 | -                 | -       | CRITICAL   |
| Recurrence (relapse) - not reported |              |              |               |              |             |                      |                          |                                |                   |                   |         |            |
| -                                   | -            | -            | -             | -            | -           | -                    | -                        | -                              | -                 | -                 | -       | CRITICAL   |

**CI:** Confidence interval; **RR:** Risk ratio

**Table E3.11. Question XI:** In patients with rifampicin-susceptible *M. kansasii* pulmonary disease, should amikacin or streptomycin be included in the treatment regimen?

| Quality assessment   |                       |                      |               |              |                          |                                                  | Nº of patients                              |                                                | Effect            |                   | Quality          | Importance |
|----------------------|-----------------------|----------------------|---------------|--------------|--------------------------|--------------------------------------------------|---------------------------------------------|------------------------------------------------|-------------------|-------------------|------------------|------------|
| Nº of studies        | Study design          | Risk of bias         | Inconsistency | Indirectness | Imprecision              | Other considerations                             | a treatment regimen with a parenteral agent | a treatment regimen without a parenteral agent | Relative (95% CI) | Absolute (95% CI) |                  |            |
| Cure of NTM          |                       |                      |               |              |                          |                                                  |                                             |                                                |                   |                   |                  |            |
| 1                    | observational studies | serious <sup>1</sup> | not serious   | not serious  | not serious              | publication bias strongly suspected <sup>2</sup> | 8/10 (80.0%)                                | -                                              | -                 | -                 | ⊕○○○<br>VERY LOW | CRITICAL   |
| Death                |                       |                      |               |              |                          |                                                  |                                             |                                                |                   |                   |                  |            |
| 2                    | observational studies | serious <sup>1</sup> | not serious   | not serious  | not serious <sup>2</sup> | publication bias strongly suspected <sup>2</sup> | 30/121 (24.8%)                              | not pooled                                     | not pooled        | see comment       | ⊕○○○<br>VERY LOW | CRITICAL   |
| Recurrence (relapse) |                       |                      |               |              |                          |                                                  |                                             |                                                |                   |                   |                  |            |
| 2                    | observational studies | serious <sup>1</sup> | not serious   | not serious  | < not serious            | publication bias strongly suspected <sup>2</sup> | 6/115 (5.2%)                                | not pooled                                     | not pooled        | see comment       | ⊕○○○<br>VERY LOW | CRITICAL   |
| Culture Conversion   |                       |                      |               |              |                          |                                                  |                                             |                                                |                   |                   |                  |            |



| Quality assessment                  |                       |                      |               |              |             |                                                  | № of patients                               |                                                | Effect            |                   | Quality          | Importance |
|-------------------------------------|-----------------------|----------------------|---------------|--------------|-------------|--------------------------------------------------|---------------------------------------------|------------------------------------------------|-------------------|-------------------|------------------|------------|
| № of studies                        | Study design          | Risk of bias         | Inconsistency | Indirectness | Imprecision | Other considerations                             | a treatment regimen with a parenteral agent | a treatment regimen without a parenteral agent | Relative (95% CI) | Absolute (95% CI) |                  |            |
| 2                                   | observational studies | serious <sup>1</sup> | not serious   | not serious  | not serious | publication bias strongly suspected <sup>2</sup> | 42/44 (95.5%)                               | not pooled                                     | not pooled        | see comment       | ⊕○○○<br>VERY LOW | CRITICAL   |
| Any adverse effect                  |                       |                      |               |              |             |                                                  |                                             |                                                |                   |                   |                  |            |
| 1                                   | observational studies | serious <sup>1</sup> | not serious   | not serious  | not serious | publication bias strongly suspected <sup>2</sup> | 11/75 (14.7%)                               | -                                              | -                 | -                 | ⊕○○○<br>VERY LOW | CRITICAL   |
| Serious Adverse Effect              |                       |                      |               |              |             |                                                  |                                             |                                                |                   |                   |                  |            |
| 1                                   | observational studies | serious <sup>1</sup> | not serious   | not serious  | not serious | publication bias strongly suspected <sup>2</sup> | 0/75 (0.0%)                                 | -                                              | -                 | -                 | ⊕○○○<br>VERY LOW | CRITICAL   |
| Withdrawal owing to adverse effects |                       |                      |               |              |             |                                                  |                                             |                                                |                   |                   |                  |            |
| 1                                   | observational studies | serious <sup>1</sup> | not serious   | not serious  | not serious | publication bias strongly suspected <sup>2</sup> | 7/75 (9.3%)                                 | -                                              | -                 | -                 | ⊕○○○<br>VERY LOW | CRITICAL   |
| Quality of Life - not measured      |                       |                      |               |              |             |                                                  |                                             |                                                |                   |                   |                  |            |

| Quality assessment                                  |              |              |               |              |             |                      | № of patients                               |                                                | Effect            |                   | Quality | Importance |
|-----------------------------------------------------|--------------|--------------|---------------|--------------|-------------|----------------------|---------------------------------------------|------------------------------------------------|-------------------|-------------------|---------|------------|
| № of studies                                        | Study design | Risk of bias | Inconsistency | Indirectness | Imprecision | Other considerations | a treatment regimen with a parenteral agent | a treatment regimen without a parenteral agent | Relative (95% CI) | Absolute (95% CI) |         |            |
| -                                                   | -            | -            | -             | -            | -           | -                    | -                                           | -                                              | -                 | -                 | -       | CRITICAL   |
| Development of Antibiotic Resistance - not measured |              |              |               |              |             |                      |                                             |                                                |                   |                   |         |            |
| -                                                   | -            | -            | -             | -            | -           | -                    | -                                           | -                                              | -                 | -                 | -       | CRITICAL   |

**CI:** Confidence interval; **RR:** Risk ratio; **OR:** Odds ratio

1. Case series, no control group
2. Based on case series data. There are likely unpublished case series not included in the analysis.

**Table E3.12. Question XII:** In patients with rifampicin susceptible *M. kansasii* pulmonary disease, should a treatment regimen that includes a fluoroquinolone or a regimen without a fluoroquinolone be used?

| Quality assessment                                  |              |              |               |              |             |                      | № of patients                    |                                     | Effect            |                   | Quality | Importance |
|-----------------------------------------------------|--------------|--------------|---------------|--------------|-------------|----------------------|----------------------------------|-------------------------------------|-------------------|-------------------|---------|------------|
| № of studies                                        | Study design | Risk of bias | Inconsistency | Indirectness | Imprecision | Other considerations | a regimen with a fluoroquinolone | a regimen without a fluoroquinolone | Relative (95% CI) | Absolute (95% CI) |         |            |
| Cure of NTM Disease - not measured                  |              |              |               |              |             |                      |                                  |                                     |                   |                   |         |            |
| -                                                   | -            | -            | -             | -            | -           | -                    | -                                | -                                   | -                 | -                 | -       | CRITICAL   |
| Development of antibiotic resistance - not measured |              |              |               |              |             |                      |                                  |                                     |                   |                   |         |            |
| -                                                   | -            | -            | -             | -            | -           | -                    | -                                | -                                   | -                 | -                 | -       | CRITICAL   |
| Recurrence (relapse) - not measured                 |              |              |               |              |             |                      |                                  |                                     |                   |                   |         |            |
| -                                                   | -            | -            | -             | -            | -           | -                    | -                                | -                                   | -                 | -                 | -       | CRITICAL   |
| Quality of Life - not measured                      |              |              |               |              |             |                      |                                  |                                     |                   |                   |         |            |
| -                                                   | -            | -            | -             | -            | -           | -                    | -                                | -                                   | -                 | -                 | -       | CRITICAL   |
| Culture Conversion - not measured                   |              |              |               |              |             |                      |                                  |                                     |                   |                   |         |            |
| -                                                   | -            | -            | -             | -            | -           | -                    | -                                | -                                   | -                 | -                 | -       | CRITICAL   |
| Death - not measured                                |              |              |               |              |             |                      |                                  |                                     |                   |                   |         |            |

| Quality assessment                  |              |              |               |              |             |                      | № of patients                    |                                     | Effect            |                   | Quality | Importance |
|-------------------------------------|--------------|--------------|---------------|--------------|-------------|----------------------|----------------------------------|-------------------------------------|-------------------|-------------------|---------|------------|
| № of studies                        | Study design | Risk of bias | Inconsistency | Indirectness | Imprecision | Other considerations | a regimen with a fluoroquinolone | a regimen without a fluoroquinolone | Relative (95% CI) | Absolute (95% CI) |         |            |
| -                                   | -            | -            | -             | -            | -           | -                    | -                                | -                                   | -                 | -                 | -       | CRITICAL   |
| Adverse drug effects - not measured |              |              |               |              |             |                      |                                  |                                     |                   |                   |         |            |
| -                                   | -            | -            | -             | -            | -           | -                    | -                                | -                                   | -                 | -                 | -       | CRITICAL   |

**CI:** Confidence interval; **OR:** Odds ratio

**Table E3.13. Question XIII:** In patients with rifampicin susceptible *M. kansasii* pulmonary disease, should a three times per week or daily treatment regimen be used?

| Quality assessment   |                       |                      |                      |              |             |                                                  | No of patients                           |                           | Effect            |                   | Quality          | Importance |
|----------------------|-----------------------|----------------------|----------------------|--------------|-------------|--------------------------------------------------|------------------------------------------|---------------------------|-------------------|-------------------|------------------|------------|
| No of studies        | Study design          | Risk of bias         | Inconsistency        | Indirectness | Imprecision | Other considerations                             | a three times per week treatment regimen | a daily treatment regimen | Relative (95% CI) | Absolute (95% CI) |                  |            |
| Cure of NTM          |                       |                      |                      |              |             |                                                  |                                          |                           |                   |                   |                  |            |
| 2                    | observational studies | serious <sup>1</sup> | serious <sup>2</sup> | not serious  | not serious | publication bias strongly suspected <sup>3</sup> | 0/0                                      | 115/182 (63.2%)           | not pooled        | see comment       | ⊕○○○<br>VERY LOW | CRITICAL   |
| Death                |                       |                      |                      |              |             |                                                  |                                          |                           |                   |                   |                  |            |
| 3                    | observational studies | serious <sup>3</sup> | serious <sup>2</sup> | not serious  | not serious | publication bias strongly suspected <sup>3</sup> | 0/18 (0.0%)                              | 39/229 (17.0%)            | not pooled        | see comment       | ⊕○○○<br>VERY LOW | CRITICAL   |
| Recurrence (relapse) |                       |                      |                      |              |             |                                                  |                                          |                           |                   |                   |                  |            |
| 3                    | observational studies | serious <sup>1</sup> | not serious          | not serious  | not serious | publication bias strongly suspected <sup>3</sup> | 0/14 (0.0%)                              | 16/178 (9.0%)             | not pooled        | see comment       | ⊕○○○<br>VERY LOW | CRITICAL   |
| Culture Conversion   |                       |                      |                      |              |             |                                                  |                                          |                           |                   |                   |                  |            |
| 4                    | observational studies | serious <sup>1</sup> | not serious          | not serious  | not serious | publication bias strongly suspected <sup>3</sup> | 17/18 (94.4%)                            | 238/257 (92.6%)           | not pooled        | see comment       | ⊕○○○<br>VERY LOW | CRITICAL   |



| Quality assessment                                  |              |              |               |              |             |                      | № of patients                            |                           | Effect            |                   | Quality | Importance |
|-----------------------------------------------------|--------------|--------------|---------------|--------------|-------------|----------------------|------------------------------------------|---------------------------|-------------------|-------------------|---------|------------|
| № of studies                                        | Study design | Risk of bias | Inconsistency | Indirectness | Imprecision | Other considerations | a three times per week treatment regimen | a daily treatment regimen | Relative (95% CI) | Absolute (95% CI) |         |            |
| Development of antibiotic resistance - not measured |              |              |               |              |             |                      |                                          |                           |                   |                   |         |            |
| -                                                   | -            | -            | -             | -            | -           | -                    | -                                        | -                         | -                 | -                 | -       | CRITICAL   |

**CI:** Confidence interval; **RR:** Risk ratio

1. Case series, no control groups
2. Wide variation between studies
3. Data based on case series. There are likely unpublished case series that were not included.

**Table E3.14. Question XIV:** In patients with rifampicin-susceptible *M. kansasii* pulmonary disease, should treatment be continued for less than 12 months or 12 or more months?

| Quality assessment |                   |                      |               |              |                      |                      | № of patients                                    |                                                    | Effect                  |                                                | Quality     | Importance |
|--------------------|-------------------|----------------------|---------------|--------------|----------------------|----------------------|--------------------------------------------------|----------------------------------------------------|-------------------------|------------------------------------------------|-------------|------------|
| № of studies       | Study design      | Risk of bias         | Inconsistency | Indirectness | Imprecision          | Other considerations | <12 months of treatment after culture negativity | >= 12 months of treatment after culture negativity | Relative (95% CI)       | Absolute (95% CI)                              |             |            |
| Cure of NTM        |                   |                      |               |              |                      |                      |                                                  |                                                    |                         |                                                |             |            |
| 1                  | randomised trials | serious <sup>1</sup> | not serious   | not serious  | serious <sup>2</sup> | none                 | 14/14 (100.0%)                                   | 14/14 (100.0%)                                     | RR 1.00 (0.88 to 1.14)  | 0 fewer per 1,000 (from 120 fewer to 140 more) | ⊕⊕○○<br>LOW | CRITICAL   |
| Recurrence         |                   |                      |               |              |                      |                      |                                                  |                                                    |                         |                                                |             |            |
| 1                  | randomised trials | serious <sup>1</sup> | not serious   | not serious  | serious <sup>2</sup> | none                 | 1/14 (7.1%)                                      | 0/14 (0.0%)                                        | RR 3.00 (0.13 to 67.91) | 0 fewer per 1,000 (from 0 fewer to 0 fewer)    | ⊕⊕○○<br>LOW | CRITICAL   |
| Culture Conversion |                   |                      |               |              |                      |                      |                                                  |                                                    |                         |                                                |             |            |



[illegible]

**CI:** Confidence interval; **RR:** Risk ratio

1. No blinding, unclear concealment
2. Few events

**Table E3.15. Question XV:** In patients with *M. xenopi* pulmonary disease, should a treatment regimen that includes a fluoroquinolone or a regimen without a fluoroquinolone be used?

| Quality assessment                        |                   |                      |               |              |                      |                      | № of patients                  |                                   | Effect                 |                                            | Quality     | Importance |
|-------------------------------------------|-------------------|----------------------|---------------|--------------|----------------------|----------------------|--------------------------------|-----------------------------------|------------------------|--------------------------------------------|-------------|------------|
| № of studies                              | Study design      | Risk of bias         | Inconsistency | Indirectness | Imprecision          | Other considerations | a quinolone containing regimen | regimen without a fluoroquinolone | Relative (95% CI)      | Absolute (95% CI)                          |             |            |
| Death (follow up: 5 years)                |                   |                      |               |              |                      |                      |                                |                                   |                        |                                            |             |            |
| 1                                         | randomised trials | serious <sup>1</sup> | not serious   | not serious  | serious <sup>2</sup> | none                 | 8/17 (47.1%)                   | 5/17 (29.4%)                      | RR 1.60 (0.66 to 3.91) | 18 more per 100 (from 10 fewer to 86 more) | ⊕⊕○○<br>LOW | CRITICAL   |
| Quality of life - not measured            |                   |                      |               |              |                      |                      |                                |                                   |                        |                                            |             |            |
| -                                         | -                 | -                    | -             | -            | -                    | -                    | -                              | -                                 | -                      | -                                          | -           | CRITICAL   |
| Cure of NTM disease (follow up: 5 years)  |                   |                      |               |              |                      |                      |                                |                                   |                        |                                            |             |            |
| 1                                         | randomised trials | serious <sup>1</sup> | not serious   | not serious  | serious <sup>2</sup> | none                 | 6/17 (35.3%)                   | 6/17 (35.3%)                      | RR 1.00 (0.40 to 2.48) | 0 fewer per 100 (from 21 fewer to 52 more) | ⊕⊕○○<br>LOW | CRITICAL   |
| Recurrence (relapse) (follow up: 5 years) |                   |                      |               |              |                      |                      |                                |                                   |                        |                                            |             |            |

| Quality assessment                                  |                   |                      |               |              |                      |                      | No of patients                 |                                   | Effect                 |                                            | Quality     | Importance |
|-----------------------------------------------------|-------------------|----------------------|---------------|--------------|----------------------|----------------------|--------------------------------|-----------------------------------|------------------------|--------------------------------------------|-------------|------------|
| No of studies                                       | Study design      | Risk of bias         | Inconsistency | Indirectness | Imprecision          | Other considerations | a quinolone containing regimen | regimen without a fluoroquinolone | Relative (95% CI)      | Absolute (95% CI)                          |             |            |
| 1                                                   | randomised trials | serious <sup>1</sup> | not serious   | not serious  | serious <sup>3</sup> | none                 | 0/17 (0.0%)                    | 2/17 (11.8%)                      | RR 0.20 (0.01 to 3.88) | 9 fewer per 100 (from 12 fewer to 34 more) | ⊕⊕○○<br>LOW | CRITICAL   |
| Culture conversion - not reported                   |                   |                      |               |              |                      |                      |                                |                                   |                        |                                            |             |            |
| -                                                   | -                 | -                    | -             | -            | -                    | -                    | -                              | -                                 | -                      | -                                          | -           | CRITICAL   |
| Development of antibiotic resistance - not measured |                   |                      |               |              |                      |                      |                                |                                   |                        |                                            |             |            |
| -                                                   | -                 | -                    | -             | -            | -                    | -                    | -                              | -                                 | -                      | -                                          | -           | CRITICAL   |
| Severe adverse effects - not reported               |                   |                      |               |              |                      |                      |                                |                                   |                        |                                            |             |            |
| -                                                   | -                 | -                    | -             | -            | -                    | -                    | -                              | -                                 | -                      | -                                          | -           | CRITICAL   |
| Any adverse effects (follow up: 2 years)            |                   |                      |               |              |                      |                      |                                |                                   |                        |                                            |             |            |

| Quality assessment |                   |                      |               |                      |                      |                      | № of patients                  |                                   | Effect                           |                                                    | Quality          | Importance |
|--------------------|-------------------|----------------------|---------------|----------------------|----------------------|----------------------|--------------------------------|-----------------------------------|----------------------------------|----------------------------------------------------|------------------|------------|
| № of studies       | Study design      | Risk of bias         | Inconsistency | Indirectness         | Imprecision          | Other considerations | a quinolone containing regimen | regimen without a fluoroquinolone | Relative (95% CI)                | Absolute (95% CI)                                  |                  |            |
| 1                  | randomised trials | serious <sup>1</sup> | not serious   | serious <sup>4</sup> | serious <sup>5</sup> | none                 | 38/185 (20.5%)                 | 37/186 (19.9%)                    | <b>RR 1.03</b><br>(0.69 to 1.55) | <b>1 more per 100</b><br>(from 6 fewer to 11 more) | ⊕○○○<br>VERY LOW | CRITICAL   |

**CI:** Confidence interval; **RR:** Risk ratio

1. Participants and investigators were not blinded
2. Only 13 events; CI does not exclude an appreciable benefit with either intervention
3. Only 2 events and 34 patients in total
4. AEs were not reported separately for M. xenopi
5. Only 75 events and CI does not exclude appreciable benefit with either intervention

**Table E3.16. Question XVI:** In patients with *M. xenopi* pulmonary disease, should a two, three or four-drug regimen be used for treatment?

[illegible]

| Quality assessment                                  |              |              |               |              |             |                      | № of patients      |                      | Effect            |                   | Quality | Importance |
|-----------------------------------------------------|--------------|--------------|---------------|--------------|-------------|----------------------|--------------------|----------------------|-------------------|-------------------|---------|------------|
| № of studies                                        | Study design | Risk of bias | Inconsistency | Indirectness | Imprecision | Other considerations | a two drug regimen | a three drug regimen | Relative (95% CI) | Absolute (95% CI) |         |            |
| Development of antibiotic resistance - not measured |              |              |               |              |             |                      |                    |                      |                   |                   |         |            |
| -                                                   | -            | -            | -             | -            | -           | -                    | -                  | -                    | -                 | -                 | -       | CRITICAL   |
| Culture Conversion - not reported                   |              |              |               |              |             |                      |                    |                      |                   |                   |         |            |
| -                                                   | -            | -            | -             | -            | -           | -                    | -                  | -                    | -                 | -                 | -       | CRITICAL   |

**CI:** Confidence interval; **RR:** Risk ratio

1. No blinding, unclear if properly randomized/concealed
2. Wide confidence interval, small number of events

**Table E3.17. Question XVII:** In patients with *M. xenopi* pulmonary disease, should amikacin or streptomycin be included in the treatment regimen?

| Quality assessment                  |              |              |               |              |             |                      | № of patients |                     | Effect            |                   | Quality | Importance |  |
|-------------------------------------|--------------|--------------|---------------|--------------|-------------|----------------------|---------------|---------------------|-------------------|-------------------|---------|------------|--|
| № of studies                        | Study design | Risk of bias | Inconsistency | Indirectness | Imprecision | Other considerations | Parenteral    | no parenteral agent | Relative (95% CI) | Absolute (95% CI) |         |            |  |
| Cure of NTM disease - not measured  |              |              |               |              |             |                      |               |                     |                   |                   |         |            |  |
| -                                   | -            | -            | -             | -            | -           | -                    | -             | -                   | -                 | see comment       | -       | CRITICAL   |  |
| Death - not measured                |              |              |               |              |             |                      |               |                     |                   |                   |         |            |  |
| -                                   | -            | -            | -             | -            | -           | -                    | -             | -                   | -                 | see comment       | -       | CRITICAL   |  |
| Recurrence (relapse) - not measured |              |              |               |              |             |                      |               |                     |                   |                   |         |            |  |
| -                                   | -            | -            | -             | -            | -           | -                    | -             | -                   | -                 | see comment       | -       | CRITICAL   |  |
| Quality of life - not measured      |              |              |               |              |             |                      |               |                     |                   |                   |         |            |  |
| -                                   | -            | -            | -             | -            | -           | -                    | -             | -                   | -                 | see comment       | -       | CRITICAL   |  |
| Culture conversion - not measured   |              |              |               |              |             |                      |               |                     |                   |                   |         |            |  |
| -                                   | -            | -            | -             | -            | -           | -                    | -             | -                   | -                 | see comment       | -       | CRITICAL   |  |
| Adverse drug effects - not measured |              |              |               |              |             |                      |               |                     |                   |                   |         |            |  |
| -                                   | -            | -            | -             | -            | -           | -                    | -             | -                   | -                 | see comment       | -       | CRITICAL   |  |



| Quality assessment                                  |              |              |               |              |             |                      | № of patients |                     | Effect            |                   | Quality | Importance |
|-----------------------------------------------------|--------------|--------------|---------------|--------------|-------------|----------------------|---------------|---------------------|-------------------|-------------------|---------|------------|
| № of studies                                        | Study design | Risk of bias | Inconsistency | Indirectness | Imprecision | Other considerations | Parenteral    | no parenteral agent | Relative (95% CI) | Absolute (95% CI) |         |            |
| Development of antibiotic resistance - not measured |              |              |               |              |             |                      |               |                     |                   |                   |         |            |
| -                                                   | -            | -            | -             | -            | -           | -                    | -             | -                   | -                 | see comment       | -       | CRITICAL   |

CI: Confidence interval

**Table E3.18. Question XVIII:** In patients with *M. xenopi* pulmonary disease, should treatment be continued for less than 12 months or 12 or more months after culture conversion?

| Quality assessment |                       |                      |               |                      |                      |                      | № of patients                                    |                                                    | Effect                              |                                                            | Quality          | Importance |
|--------------------|-----------------------|----------------------|---------------|----------------------|----------------------|----------------------|--------------------------------------------------|----------------------------------------------------|-------------------------------------|------------------------------------------------------------|------------------|------------|
| № of studies       | Study design          | Risk of bias         | Inconsistency | Indirectness         | Imprecision          | Other considerations | <12 months of treatment after culture negativity | >= 12 months of treatment after culture negativity | Relative (95% CI)                   | Absolute (95% CI)                                          |                  |            |
| Cure of NTM        |                       |                      |               |                      |                      |                      |                                                  |                                                    |                                     |                                                            |                  |            |
| 2                  | observational studies | serious <sup>1</sup> | not serious   | serious <sup>2</sup> | serious <sup>3</sup> | none                 | 6/27<br>(22.2%)                                  | 13/27<br>(48.1%)                                   | RR<br><b>0.54</b><br>(0.26 to 1.13) | <b>221 fewer per 1,000</b><br>(from 63 more to 356 fewer)  | ⊕○○○<br>VERY LOW | CRITICAL   |
| Recurrence         |                       |                      |               |                      |                      |                      |                                                  |                                                    |                                     |                                                            |                  |            |
| 2                  | observational studies | serious <sup>1</sup> | not serious   | serious <sup>2</sup> | serious <sup>3</sup> | none                 | 6/27<br>(22.2%)                                  | 10/27<br>(37.0%)                                   | RR<br><b>0.58</b><br>(0.26 to 1.30) | <b>156 fewer per 1,000</b><br>(from 111 more to 274 fewer) | ⊕○○○<br>VERY LOW | CRITICAL   |
| Culture conversion |                       |                      |               |                      |                      |                      |                                                  |                                                    |                                     |                                                            |                  |            |

[illegible]

**CI:** Confidence interval; **RR:** Risk ratio

1. No control for confounding
2. Not a direct comparison
3. Wide confidence interval



| Quality assessment                                  |                       |                      |               |              |             |                                                  | № of patients                  |                                    | Effect            |                   | Quality              | Importance |
|-----------------------------------------------------|-----------------------|----------------------|---------------|--------------|-------------|--------------------------------------------------|--------------------------------|------------------------------------|-------------------|-------------------|----------------------|------------|
| № of studies                                        | Study design          | Risk of bias         | Inconsistency | Indirectness | Imprecision | Other considerations                             | a macrolide-containing regimen | a non-macrolide-containing regimen | Relative (95% CI) | Absolute (95% CI) |                      |            |
| 1                                                   | observational studies | serious <sup>3</sup> | not serious   | not serious  | not serious | publication bias strongly suspected <sup>2</sup> | 47/65 (72.3%)                  | -                                  | -                 | -                 | ⊕○○<br>○<br>VERY LOW | CRITICAL   |
| Any adverse effect                                  |                       |                      |               |              |             |                                                  |                                |                                    |                   |                   |                      |            |
| 1                                                   | observational studies | serious <sup>3</sup> | not serious   | not serious  | not serious | publication bias strongly suspected <sup>2</sup> | 14/65 (21.5%)                  | -                                  | -                 | -                 | ⊕○○<br>○<br>VERY LOW | CRITICAL   |
| Withdrawal owing to adverse effect                  |                       |                      |               |              |             |                                                  |                                |                                    |                   |                   |                      |            |
| 1                                                   | observational studies | serious <sup>3</sup> | not serious   | not serious  | not serious | publication bias strongly suspected <sup>2</sup> | 6/65 (9.2%)                    | -                                  | -                 | -                 | ⊕○○<br>○<br>VERY LOW | CRITICAL   |
| Development of antibiotic resistance - not measured |                       |                      |               |              |             |                                                  |                                |                                    |                   |                   |                      |            |
| -                                                   | -                     | -                    | -             | -            | -           | -                                                | -                              | -                                  | -                 | -                 | -                    | CRITICAL   |
| Quality of life - not measured                      |                       |                      |               |              |             |                                                  |                                |                                    |                   |                   |                      |            |

| Quality assessment |              |              |               |              |             |                      | № of patients                  |                                    | Effect            |                   | Quality | Importance |
|--------------------|--------------|--------------|---------------|--------------|-------------|----------------------|--------------------------------|------------------------------------|-------------------|-------------------|---------|------------|
| № of studies       | Study design | Risk of bias | Inconsistency | Indirectness | Imprecision | Other considerations | a macrolide-containing regimen | a non-macrolide containing regimen | Relative (95% CI) | Absolute (95% CI) |         |            |
| -                  | -            | -            | -             | -            | -           | -                    | -                              | -                                  | -                 | -                 | -       | CRITICAL   |

**CI:** Confidence interval; **RR:** Risk ratio

1. No control for confounding
2. Data limited to case series and likely that there have been unpublished case series not captured
3. No control group

**Table E3.20. Question XX:** How many antibiotics should be included within multidrug regimens for treatment of *Mycobacterium abscessus* pulmonary infection.

| Quality assessment                                |                       |                      |               |                      |                      |                      | № of patients |                      | Effect                  |                                                             | Quality          | Importance |
|---------------------------------------------------|-----------------------|----------------------|---------------|----------------------|----------------------|----------------------|---------------|----------------------|-------------------------|-------------------------------------------------------------|------------------|------------|
| № of studies                                      | Study design          | Risk of bias         | Inconsistency | Indirectness         | Imprecision          | Other considerations | two drugs     | three vs. four drugs | Relative (95% CI)       | Absolute (95% CI)                                           |                  |            |
| Cure of NTM disease (follow up: median 445 days)  |                       |                      |               |                      |                      |                      |               |                      |                         |                                                             |                  |            |
| 1                                                 | observational studies | serious <sup>1</sup> | not serious   | serious <sup>2</sup> | serious              | none                 | 13/17 (76.5%) | 20/24 (83.3%)        | RR 0.92 (0.67 to 1.26)  | 67 fewer per 1000 (from 217 more to 275 fewer)              | ⊕○○○<br>VERY LOW | CRITICAL   |
| Recurrence (relapse) (follow up: median 445 days) |                       |                      |               |                      |                      |                      |               |                      |                         |                                                             |                  |            |
| 1                                                 | observational studies | serious <sup>1</sup> | not serious   | serious <sup>2</sup> | serious <sup>3</sup> | none                 | 3/13 (23.1%)  | 1/20 (5.0%)          | RR 4.62 (0.54 to 39.73) | 181 more per 1000 (from 23 fewer to 1000 more) <sup>2</sup> | ⊕○○○<br>VERY LOW | CRITICAL   |
| Any adverse effect (follow up: median 445 days)   |                       |                      |               |                      |                      |                      |               |                      |                         |                                                             |                  |            |
| 1                                                 | observational studies | serious <sup>1</sup> | not serious   | serious <sup>2</sup> | serious <sup>3</sup> | none                 | 3/17 (17.6%)  | 15/24 (62.5%)        | RR 0.28 (0.10 to 0.83)  | 450 fewer per 1000 (from 106 fewer to 563 fewer)            | ⊕○○○<br>VERY LOW | CRITICAL   |
| Culture conversion                                |                       |                      |               |                      |                      |                      |               |                      |                         |                                                             |                  |            |



| Quality assessment                                  |                       |                      |               |                      |                      |                      | № of patients                                                                                                                               |                      | Effect            |                   | Quality          | Importance |
|-----------------------------------------------------|-----------------------|----------------------|---------------|----------------------|----------------------|----------------------|---------------------------------------------------------------------------------------------------------------------------------------------|----------------------|-------------------|-------------------|------------------|------------|
| № of studies                                        | Study design          | Risk of bias         | Inconsistency | Indirectness         | Imprecision          | Other considerations | two drugs                                                                                                                                   | three vs. four drugs | Relative (95% CI) | Absolute (95% CI) |                  |            |
| 1                                                   | observational studies | serious <sup>1</sup> | not serious   | serious <sup>2</sup> | serious <sup>3</sup> | none                 | The study reported no significant difference between the two groups, but only reported a p-value of 0.698 without specifying exact numbers. |                      |                   |                   | ⊕○○○<br>VERY LOW | CRITICAL   |
| Quality of Life - not measured                      |                       |                      |               |                      |                      |                      |                                                                                                                                             |                      |                   |                   |                  |            |
| -                                                   | -                     | -                    | -             | -                    | -                    | -                    | -                                                                                                                                           | -                    | -                 | -                 | -                | CRITICAL   |
| Development of antibiotic resistance - not measured |                       |                      |               |                      |                      |                      |                                                                                                                                             |                      |                   |                   |                  |            |
| -                                                   | -                     | -                    | -             | -                    | -                    | -                    | -                                                                                                                                           | -                    | -                 | -                 | -                | CRITICAL   |
| Death - not reported                                |                       |                      |               |                      |                      |                      |                                                                                                                                             |                      |                   |                   |                  |            |
| -                                                   | -                     | -                    | -             | -                    | -                    | -                    | -                                                                                                                                           | -                    | -                 | -                 | -                | CRITICAL   |

**CI:** Confidence interval; **RR:** Risk ratio

1. Observational study without blinding, randomization
2. Unclear subspecies of *M. abscessus*
3. large range in confidence interval, few events



| Quality assessment                  |              |              |               |              |             |                      | № of patients            |                         | Effect            |                   | Quality | Importance |
|-------------------------------------|--------------|--------------|---------------|--------------|-------------|----------------------|--------------------------|-------------------------|-------------------|-------------------|---------|------------|
| № of studies                        | Study design | Risk of bias | Inconsistency | Indirectness | Imprecision | Other considerations | shorter therapy duration | longer therapy duration | Relative (95% CI) | Absolute (95% CI) |         |            |
| Death - not reported                |              |              |               |              |             |                      |                          |                         |                   |                   |         |            |
| -                                   | -            | -            | -             | -            | -           | -                    | -                        | -                       | -                 | -                 | -       | CRITICAL   |
| Adverse drug effects - not reported |              |              |               |              |             |                      |                          |                         |                   |                   |         |            |
| -                                   | -            | -            | -             | -            | -           | -                    | -                        | -                       | -                 | -                 | -       | CRITICAL   |

**CI:** Confidence interval; **RR:** Risk ratio

1. No control for confounding
2. Not a direct comparison, various regimens and course length
3. Wide confidence interval

**Table E3.22. Question XXII: Should surgery plus medical therapy or medical therapy alone be used to treat NTM pulmonary disease?**

| Quality assessment    |                       |                          |               |              |                      |                                                  | № of patients   |                 | Effect            |                   | Quality          | Importance |
|-----------------------|-----------------------|--------------------------|---------------|--------------|----------------------|--------------------------------------------------|-----------------|-----------------|-------------------|-------------------|------------------|------------|
| № of studies          | Study design          | Risk of bias             | Inconsistency | Indirectness | Imprecision          | Other considerations                             | surgery         | medical therapy | Relative (95% CI) | Absolute (95% CI) |                  |            |
| Cure of NTM           |                       |                          |               |              |                      |                                                  |                 |                 |                   |                   |                  |            |
| 1                     | observational studies | serious <sup>1</sup>     | not serious   | not serious  | serious <sup>2</sup> | none                                             | 13/23 (56.5%)   | 13/46 (28.3%)   | not estimable     |                   | ⊕○○○<br>VERY LOW | CRITICAL   |
| Death                 |                       |                          |               |              |                      |                                                  |                 |                 |                   |                   |                  |            |
| 10                    | observational studies | serious <sup>3</sup>     | not serious   | not serious  | serious <sup>2</sup> | publication bias strongly suspected <sup>4</sup> | 20/486 (4.1%)   | 13/83 (15.7%)   | not estimable     |                   | ⊕○○○<br>VERY LOW | CRITICAL   |
| Recurrence            |                       |                          |               |              |                      |                                                  |                 |                 |                   |                   |                  |            |
| 9                     | observational studies | serious <sup>1,3</sup>   | not serious   | not serious  | serious <sup>2</sup> | publication bias strongly suspected <sup>4</sup> | 22/391 (5.6%)   | 12/102 (11.8%)  | not estimable     |                   | ⊕○○○<br>VERY LOW | CRITICAL   |
| Culture conversion    |                       |                          |               |              |                      |                                                  |                 |                 |                   |                   |                  |            |
| 10                    | observational studies | serious <sup>1,3,5</sup> | not serious   | not serious  | serious <sup>2</sup> | publication bias strongly suspected <sup>4</sup> | 283/331 (85.5%) | 18/46 (39.1%)   | not estimable     |                   | ⊕○○○<br>VERY LOW | CRITICAL   |
| Surgical Complication |                       |                          |               |              |                      |                                                  |                 |                 |                   |                   |                  |            |

| Quality assessment             |                       |                        |               |              |             |                                                  | № of patients   |                 | Effect            |                   | Quality          | Importance |
|--------------------------------|-----------------------|------------------------|---------------|--------------|-------------|--------------------------------------------------|-----------------|-----------------|-------------------|-------------------|------------------|------------|
| № of studies                   | Study design          | Risk of bias           | Inconsistency | Indirectness | Imprecision | Other considerations                             | surgery         | medical therapy | Relative (95% CI) | Absolute (95% CI) |                  |            |
| 9                              | observational studies | serious <sup>1,3</sup> | not serious   | not serious  | not serious | publication bias strongly suspected <sup>4</sup> | 111/563 (19.7%) | 0/0             | not pooled        | see comment       | ⊕○○○<br>VERY LOW | CRITICAL   |
| Quality of Life - not measured |                       |                        |               |              |             |                                                  |                 |                 |                   |                   |                  |            |
| -                              | -                     | -                      | -             | -            | -           | -                                                | -               | -               | -                 | -                 | -                | CRITICAL   |

**CI:** Confidence interval; **RR:** Risk ratio

1. No control for confounding
2. wide confidence interval
3. case series, no control group

Evidence to Decision Tables (E4.1-22)

Table E4.1. Question I

| Should patients with NTM pulmonary disease be treated with antimicrobial therapy or followed for evidence of progression (“watchful waiting”)? |                                                                                                                                |
|------------------------------------------------------------------------------------------------------------------------------------------------|--------------------------------------------------------------------------------------------------------------------------------|
| POPULATION:                                                                                                                                    | treatment of NTM pulmonary infection                                                                                           |
| INTERVENTION:                                                                                                                                  | any treatment                                                                                                                  |
| COMPARISON:                                                                                                                                    | watchful waiting                                                                                                               |
| MAIN OUTCOMES:                                                                                                                                 | Cure of NTM; Death; Culture Conversion; Any adverse effect; Quality of Life; Recurrence; Development of antibiotic resistance; |

Assessment

|                   | JUDGEMENT                                                                                                                                          | RESEARCH EVIDENCE                                                             |                                              |                 |                              |                         | ADDITIONAL CONSIDERATIONS |
|-------------------|----------------------------------------------------------------------------------------------------------------------------------------------------|-------------------------------------------------------------------------------|----------------------------------------------|-----------------|------------------------------|-------------------------|---------------------------|
| DESIRABLE EFFECTS | <b>How substantial are the desirable anticipated effects?</b><br><br>○ Trivial<br>○ Small<br>● Moderate<br>○ Large<br><br>○ Varies<br>○ Don't know | <hr/>                                                                         |                                              |                 |                              |                         |                           |
|                   |                                                                                                                                                    | <b>Any treatment compared to watchful waiting for NTM pulmonary infection</b> |                                              |                 |                              |                         |                           |
|                   |                                                                                                                                                    | Outcomes                                                                      | <b>Anticipated absolute effects (95% CI)</b> | Relative effect | Nº of participants (studies) | Quality of the evidence |                           |

|                       |                                                                                                                                                                                                                           |                                                                                   |  |  |  |  |  |
|-----------------------|---------------------------------------------------------------------------------------------------------------------------------------------------------------------------------------------------------------------------|-----------------------------------------------------------------------------------|--|--|--|--|--|
| UNDESIRABLE EFFECTS   | <p><b>How substantial are the undesirable anticipated effects?</b></p> <ul style="list-style-type: none"><li>○ Large</li><li>○ Moderate</li><li>● Small</li><li>○ Trivial</li><li>○ Varies</li><li>○ Don't know</li></ul> |                                                                                   |  |  |  |  |  |
|                       |                                                                                                                                                                                                                           |                                                                                   |  |  |  |  |  |
|                       |                                                                                                                                                                                                                           |                                                                                   |  |  |  |  |  |
|                       |                                                                                                                                                                                                                           |                                                                                   |  |  |  |  |  |
|                       |                                                                                                                                                                                                                           |                                                                                   |  |  |  |  |  |
|                       |                                                                                                                                                                                                                           |                                                                                   |  |  |  |  |  |
|                       |                                                                                                                                                                                                                           |                                                                                   |  |  |  |  |  |
|                       |                                                                                                                                                                                                                           |                                                                                   |  |  |  |  |  |
| CERTAINTY OF EVIDENCE | <p><b>What is the overall certainty of the evidence of effects?</b></p> <ul style="list-style-type: none"><li>● Very low</li><li>○ Low</li><li>○ Moderate</li><li>○ High</li><li>○ No included studies</li></ul>          | <p><b>The relative importance or values of the main outcomes of interest:</b></p> |  |  |  |  |  |
|                       |                                                                                                                                                                                                                           |                                                                                   |  |  |  |  |  |
|                       |                                                                                                                                                                                                                           |                                                                                   |  |  |  |  |  |
|                       |                                                                                                                                                                                                                           |                                                                                   |  |  |  |  |  |
|                       |                                                                                                                                                                                                                           |                                                                                   |  |  |  |  |  |
|                       |                                                                                                                                                                                                                           |                                                                                   |  |  |  |  |  |
|                       |                                                                                                                                                                                                                           |                                                                                   |  |  |  |  |  |
|                       |                                                                                                                                                                                                                           |                                                                                   |  |  |  |  |  |



|                                                                        |                                                                                                                                                                                                                                                                                                                                                                                                      | <table><tr><td>Culture Conversion</td><td>CRITICAL</td><td>⊕○○○<br/>VERY LOW</td></tr><tr><td>Quality of Life</td><td>CRITICAL</td><td>-</td></tr><tr><td>Recurrence</td><td>CRITICAL</td><td>-</td></tr><tr><td>Development of antibiotic resistance</td><td>CRITICAL</td><td>-</td></tr></table>                                                                                                                                                                                                                                                                                                                                                                                                                                                        | Culture Conversion                                                                                                                                                                                                                                                                                           | CRITICAL                     | ⊕○○○<br>VERY LOW                | Quality of Life | CRITICAL | -        | Recurrence                             | CRITICAL | -                        | Development of antibiotic resistance | CRITICAL                        | -                          |                         |             |              |                                      |                                  |                         |                  |  |
|------------------------------------------------------------------------|------------------------------------------------------------------------------------------------------------------------------------------------------------------------------------------------------------------------------------------------------------------------------------------------------------------------------------------------------------------------------------------------------|-----------------------------------------------------------------------------------------------------------------------------------------------------------------------------------------------------------------------------------------------------------------------------------------------------------------------------------------------------------------------------------------------------------------------------------------------------------------------------------------------------------------------------------------------------------------------------------------------------------------------------------------------------------------------------------------------------------------------------------------------------------|--------------------------------------------------------------------------------------------------------------------------------------------------------------------------------------------------------------------------------------------------------------------------------------------------------------|------------------------------|---------------------------------|-----------------|----------|----------|----------------------------------------|----------|--------------------------|--------------------------------------|---------------------------------|----------------------------|-------------------------|-------------|--------------|--------------------------------------|----------------------------------|-------------------------|------------------|--|
| Culture Conversion                                                     | CRITICAL                                                                                                                                                                                                                                                                                                                                                                                             | ⊕○○○<br>VERY LOW                                                                                                                                                                                                                                                                                                                                                                                                                                                                                                                                                                                                                                                                                                                                          |                                                                                                                                                                                                                                                                                                              |                              |                                 |                 |          |          |                                        |          |                          |                                      |                                 |                            |                         |             |              |                                      |                                  |                         |                  |  |
| Quality of Life                                                        | CRITICAL                                                                                                                                                                                                                                                                                                                                                                                             | -                                                                                                                                                                                                                                                                                                                                                                                                                                                                                                                                                                                                                                                                                                                                                         |                                                                                                                                                                                                                                                                                                              |                              |                                 |                 |          |          |                                        |          |                          |                                      |                                 |                            |                         |             |              |                                      |                                  |                         |                  |  |
| Recurrence                                                             | CRITICAL                                                                                                                                                                                                                                                                                                                                                                                             | -                                                                                                                                                                                                                                                                                                                                                                                                                                                                                                                                                                                                                                                                                                                                                         |                                                                                                                                                                                                                                                                                                              |                              |                                 |                 |          |          |                                        |          |                          |                                      |                                 |                            |                         |             |              |                                      |                                  |                         |                  |  |
| Development of antibiotic resistance                                   | CRITICAL                                                                                                                                                                                                                                                                                                                                                                                             | -                                                                                                                                                                                                                                                                                                                                                                                                                                                                                                                                                                                                                                                                                                                                                         |                                                                                                                                                                                                                                                                                                              |                              |                                 |                 |          |          |                                        |          |                          |                                      |                                 |                            |                         |             |              |                                      |                                  |                         |                  |  |
| VALUES                                                                 | <p><b>Is there important uncertainty about or variability in how much people value the main outcomes?</b></p> <ul style="list-style-type: none"><li>○ Important uncertainty or variability</li><li>● Possibly important uncertainty or variability</li><li>○ Probably no important uncertainty or variability</li><li>○ No important uncertainty or variability</li></ul>                            | <p>Mehta and Marras, 2011 evaluated the impact of pulmonary NTM on health-related quality of life. In this study, patients with pulmonary NTM had significantly impaired health-related quality of life with two QOL measures significantly lower than historical normal controls. Multivariable analysis showed an association between QOL scores and lung function.</p> <p>Hong, et al, 2014 also evaluated the impact of pulmonary NTM on health-related quality of life. This was a direct comparison between patients with NTM disease and healthy subjects and found patients with NTM reported more health status issues and anxiety/depression issues than healthy controls. Lung function was also independently associated with QOL scores.</p> | <p>The is no definitive evidence. The cited studies are only on quality of life and do not compare the outcome with or without treatment. The decision for treatment is often dependent on clinical symptoms and the more severe patients in term of symptoms will probably benefit most from treatment.</p> |                              |                                 |                 |          |          |                                        |          |                          |                                      |                                 |                            |                         |             |              |                                      |                                  |                         |                  |  |
| BALANCE OF EFFECTS                                                     | <p><b>Does the balance between desirable and undesirable effects favor the intervention or the comparison?</b></p> <ul style="list-style-type: none"><li>○ Favors the comparison</li><li>○ Probably favors the comparison</li><li>○ Does not favor either the intervention or the comparison</li><li>● Probably favors the intervention</li><li>○ Favors the intervention</li><li>○ Varies</li></ul> | <table><tr><th colspan="5">Any treatment compared to watchful waiting for NTM pulmonary infection</th></tr><tr><th rowspan="2">Outcomes</th><th colspan="2">Anticipated absolute effects* (95% CI)</th><th rowspan="2">Relative effect (95% CI)</th><th rowspan="2">Nº of participants (studies)</th><th rowspan="2">Quality of the evidence (GRADE)</th></tr><tr><th>Risk with watchful waiting</th><th>Risk with any treatment</th></tr><tr><td>Cure of NTM</td><td>348 per 1000</td><td><b>706 per 1000</b><br/>(153 to 1000)</td><td><b>RR 2.03</b><br/>(0.44 to 9.30)</td><td>94<br/>(2 observational)</td><td>⊕○○○<br/>VERY LOW</td></tr></table>                                                                                                   | Any treatment compared to watchful waiting for NTM pulmonary infection                                                                                                                                                                                                                                       |                              |                                 |                 |          | Outcomes | Anticipated absolute effects* (95% CI) |          | Relative effect (95% CI) | Nº of participants (studies)         | Quality of the evidence (GRADE) | Risk with watchful waiting | Risk with any treatment | Cure of NTM | 348 per 1000 | <b>706 per 1000</b><br>(153 to 1000) | <b>RR 2.03</b><br>(0.44 to 9.30) | 94<br>(2 observational) | ⊕○○○<br>VERY LOW |  |
| Any treatment compared to watchful waiting for NTM pulmonary infection |                                                                                                                                                                                                                                                                                                                                                                                                      |                                                                                                                                                                                                                                                                                                                                                                                                                                                                                                                                                                                                                                                                                                                                                           |                                                                                                                                                                                                                                                                                                              |                              |                                 |                 |          |          |                                        |          |                          |                                      |                                 |                            |                         |             |              |                                      |                                  |                         |                  |  |
| Outcomes                                                               | Anticipated absolute effects* (95% CI)                                                                                                                                                                                                                                                                                                                                                               |                                                                                                                                                                                                                                                                                                                                                                                                                                                                                                                                                                                                                                                                                                                                                           | Relative effect (95% CI)                                                                                                                                                                                                                                                                                     | Nº of participants (studies) | Quality of the evidence (GRADE) |                 |          |          |                                        |          |                          |                                      |                                 |                            |                         |             |              |                                      |                                  |                         |                  |  |
|                                                                        | Risk with watchful waiting                                                                                                                                                                                                                                                                                                                                                                           | Risk with any treatment                                                                                                                                                                                                                                                                                                                                                                                                                                                                                                                                                                                                                                                                                                                                   |                                                                                                                                                                                                                                                                                                              |                              |                                 |                 |          |          |                                        |          |                          |                                      |                                 |                            |                         |             |              |                                      |                                  |                         |                  |  |
| Cure of NTM                                                            | 348 per 1000                                                                                                                                                                                                                                                                                                                                                                                         | <b>706 per 1000</b><br>(153 to 1000)                                                                                                                                                                                                                                                                                                                                                                                                                                                                                                                                                                                                                                                                                                                      | <b>RR 2.03</b><br>(0.44 to 9.30)                                                                                                                                                                                                                                                                             | 94<br>(2 observational)      | ⊕○○○<br>VERY LOW                |                 |          |          |                                        |          |                          |                                      |                                 |                            |                         |             |              |                                      |                                  |                         |                  |  |

|                    |                                                                                                                                                                                                                                |                                                     |                                                                                                                                                                                                                                   |                                      |                                  |                                                               |
|--------------------|--------------------------------------------------------------------------------------------------------------------------------------------------------------------------------------------------------------------------------|-----------------------------------------------------|-----------------------------------------------------------------------------------------------------------------------------------------------------------------------------------------------------------------------------------|--------------------------------------|----------------------------------|---------------------------------------------------------------|
|                    | o Don't know                                                                                                                                                                                                                   |                                                     |                                                                                                                                                                                                                                   | studies)                             | 1,2                              |                                                               |
|                    |                                                                                                                                                                                                                                | Death                                               | 457 per 1000                                                                                                                                                                                                                      | <b>352 per 1000</b><br>(292 to 420)  | <b>RR 0.77</b><br>(0.64 to 0.92) | 438<br>(5 observational studies)<br>⊕○○○<br>VERY LOW<br>1,3   |
|                    |                                                                                                                                                                                                                                | Culture Conversion                                  | 505 per 1000                                                                                                                                                                                                                      | <b>713 per 1000</b><br>(253 to 1000) | <b>RR 1.41</b><br>(0.50 to 4.02) | 168<br>(2 observational studies)<br>⊕○○○<br>VERY LOW<br>1,2,4 |
|                    |                                                                                                                                                                                                                                | Any adverse effect                                  | A total of 43 out of 100 patients in the treatment group had adverse effects. In neither study was it specified if there were any adverse effects in the watchful waiting group (of 67 patients), but presumably there were none. |                                      |                                  | 167<br>(2 observational studies)<br>⊕○○○<br>VERY LOW<br>1     |
|                    |                                                                                                                                                                                                                                | Quality of Life - not measured                      | -                                                                                                                                                                                                                                 | -                                    | -                                | -                                                             |
|                    |                                                                                                                                                                                                                                | Recurrence - not measured                           | -                                                                                                                                                                                                                                 | -                                    | -                                | -                                                             |
|                    |                                                                                                                                                                                                                                | Development of antibiotic resistance - not measured | -                                                                                                                                                                                                                                 | -                                    | -                                | -                                                             |
| RESOURCES REQUIRED | <b>How large are the resource requirements (costs)?</b>                                                                                                                                                                        | No research evidence was identified.                |                                                                                                                                                                                                                                   |                                      |                                  |                                                               |
|                    | <ul style="list-style-type: none"> <li>o Large costs</li> <li>● Moderate costs</li> <li>o Negligible costs and savings</li> <li>o Moderate savings</li> <li>o Large savings</li> <li>o Varies</li> <li>o Don't know</li> </ul> |                                                     |                                                                                                                                                                                                                                   |                                      |                                  |                                                               |

|                    |                                                                                                                                                                                                                                                                                                                                                                                                                                                                          |                                      |  |
|--------------------|--------------------------------------------------------------------------------------------------------------------------------------------------------------------------------------------------------------------------------------------------------------------------------------------------------------------------------------------------------------------------------------------------------------------------------------------------------------------------|--------------------------------------|--|
| COST EFFECTIVENESS | <p><b>Does the cost-effectiveness of the intervention favor the intervention or the comparison?</b></p> <ul style="list-style-type: none"> <li>○ Favors the comparison</li> <li>○ Probably favors the comparison</li> <li>○ Does not favor either the intervention or the comparison</li> <li>○ Probably favors the intervention</li> <li>○ Favors the intervention</li> </ul> <ul style="list-style-type: none"> <li>● Varies</li> <li>○ No included studies</li> </ul> | No research evidence was identified. |  |
| EQUITY             | <p><b>What would be the impact on health equity?</b></p> <ul style="list-style-type: none"> <li>○ Reduced</li> <li>○ Probably reduced</li> <li>○ Probably no impact</li> <li>○ Probably increased</li> <li>○ Increased</li> </ul> <ul style="list-style-type: none"> <li>● Varies</li> <li>○ Don't know</li> </ul>                                                                                                                                                       | No research evidence was identified. |  |
| ACCEPTABILITY      | <p><b>Is the intervention acceptable to key stakeholders?</b></p> <ul style="list-style-type: none"> <li>○ No</li> <li>○ Probably no</li> <li>● Probably yes</li> <li>○ Yes</li> </ul> <ul style="list-style-type: none"> <li>○ Varies</li> <li>○ Don't know</li> </ul>                                                                                                                                                                                                  | No research evidence was identified. |  |
| FEASIBILITY        | <p><b>Is the intervention feasible to implement?</b></p> <ul style="list-style-type: none"> <li>○ No</li> <li>○ Probably no</li> <li>○ Probably yes</li> <li>● Yes</li> </ul> <ul style="list-style-type: none"> <li>○ Varies</li> <li>○ Don't know</li> </ul>                                                                                                                                                                                                           | No research evidence was identified. |  |

## Summary of judgments

|                              | JUDGEMENT                            |                                                      |                                                          |                                         |                         |               |                     | IMPLICATIONS |
|------------------------------|--------------------------------------|------------------------------------------------------|----------------------------------------------------------|-----------------------------------------|-------------------------|---------------|---------------------|--------------|
| <b>DESIRABLE EFFECTS</b>     | Trivial                              | Small                                                | <b>Moderate</b>                                          | Large                                   |                         | Varies        | Don't know          |              |
| <b>UNDESIRABLE EFFECTS</b>   | Large                                | Moderate                                             | <b>Small</b>                                             | Trivial                                 |                         | Varies        | Don't know          |              |
| <b>CERTAINTY OF EVIDENCE</b> | <b>Very low</b>                      | Low                                                  | Moderate                                                 | High                                    |                         |               | No included studies |              |
| <b>VALUES</b>                | Important uncertainty or variability | <b>Possibly important uncertainty or variability</b> | Probably no important uncertainty or variability         | No important uncertainty or variability |                         |               |                     |              |
| <b>BALANCE OF EFFECTS</b>    | Favors the comparison                | Probably favors the comparison                       | Does not favor either the intervention or the comparison | <b>Probably favors the intervention</b> | Favors the intervention | Varies        | Don't know          |              |
| <b>RESOURCES REQUIRED</b>    | Large costs                          | <b>Moderate costs</b>                                | Negligible costs and savings                             | Moderate savings                        | Large savings           | Varies        | Don't know          |              |
| <b>COST EFFECTIVENESS</b>    | Favors the comparison                | Probably favors the comparison                       | Does not favor either the intervention or the comparison | Probably favors the intervention        | Favors the intervention | <b>Varies</b> | No included studies |              |
| <b>EQUITY</b>                | Reduced                              | Probably reduced                                     | Probably no impact                                       | Probably increased                      | Increased               | <b>Varies</b> | Don't know          |              |
| <b>ACCEPTABILITY</b>         | No                                   | Probably no                                          | <b>Probably yes</b>                                      | Yes                                     |                         | Varies        | Don't know          |              |

|             | JUDGEMENT |             |              |     |  |        |            | IMPLICATIONS |
|-------------|-----------|-------------|--------------|-----|--|--------|------------|--------------|
| FEASIBILITY | No        | Probably no | Probably yes | Yes |  | Varies | Don't know |              |

## Conclusions

**Should patients with NTM pulmonary disease be treated with antimicrobial therapy or followed for evidence of progression (“watchful waiting”)?**

| TYPE OF RECOMMENDATION | Strong recommendation against the intervention                                                                                                                                                                                                                                                                        | Conditional recommendation against the intervention | Conditional recommendation for either the intervention or the comparison | Conditional recommendation for the intervention | Strong recommendation for the intervention |
|------------------------|-----------------------------------------------------------------------------------------------------------------------------------------------------------------------------------------------------------------------------------------------------------------------------------------------------------------------|-----------------------------------------------------|--------------------------------------------------------------------------|-------------------------------------------------|--------------------------------------------|
|                        | ○                                                                                                                                                                                                                                                                                                                     | ○                                                   | ○                                                                        | ●                                               | ○                                          |
| RECOMMENDATION         | In patients who meet the diagnostic criteria for NTM pulmonary disease, we suggest initiation of treatment rather than watchful waiting, especially in the context of positive acid-fast bacilli sputum smears and/or cavitary lung disease (conditional recommendation, very low confidence in estimates of effect). |                                                     |                                                                          |                                                 |                                            |

|                                      |                                                                                                                                                                                                                                                                                                                           |
|--------------------------------------|---------------------------------------------------------------------------------------------------------------------------------------------------------------------------------------------------------------------------------------------------------------------------------------------------------------------------|
|                                      | The expert panel voted unanimously for a conditional recommendation for the intervention.                                                                                                                                                                                                                                 |
| <b>JUSTIFICATION</b>                 | For those who have a positive acid-fast smear and/or cavitary disease, there may be increased rate of progression and poor treatment outcomes if treatment is delayed.                                                                                                                                                    |
| <b>SUBGROUP CONSIDERATIONS</b>       | Some subgroups (minimal nodular/bronchiectatic disease) may be safely followed without therapy but those with cavitary disease should not be followed expectantly.<br><br>In very frail patients with very mild nodular-bronchiectatic disease, the balance between efficacy and tolerability may favor watchful waiting. |
| <b>IMPLEMENTATION CONSIDERATIONS</b> |                                                                                                                                                                                                                                                                                                                           |
| <b>MONITORING AND EVALUATION</b>     |                                                                                                                                                                                                                                                                                                                           |
| <b>RESEARCH PRIORITIES</b>           | Research is needed to better determine the criteria for treatment according to risk factors (age, sex, comorbidities, respiratory function score, etc) in less pathogenic organisms.                                                                                                                                      |

## Table E4.2. Question II

Should patients with NTM pulmonary disease be treated empirically or based on *in vitro* drug susceptibility test results?

|                       |                                                                                                                    |
|-----------------------|--------------------------------------------------------------------------------------------------------------------|
| <b>POPULATION:</b>    | NTM pulmonary infection                                                                                            |
| <b>INTERVENTION:</b>  | empiric treatment                                                                                                  |
| <b>COMPARISON:</b>    | susceptibility-based treatment                                                                                     |
| <b>MAIN OUTCOMES:</b> | Quality of Life; Cure of NTM Disease; Death; Development of antibiotic resistance; Recurrence; Culture Conversion; |

## Assessment

|        | JUDGEMENT                         | RESEARCH EVIDENCE | ADDITIONAL CONSIDERATIONS         |
|--------|-----------------------------------|-------------------|-----------------------------------|
| REVIEW | How substantial are the desirable |                   | The one identified study for this |

|                                                     | <div>anticipated effects?</div> <div><div><div>○ Trivial</div><div>○ Small</div><div>○ Moderate</div><div>○ Large</div></div><div><div>○ Varies</div><div>● Don't know</div></div></div>                                     | <div>Empiric treatment compared to susceptibility-based treatment for NTM pulmonary infection</div> <table><tr><th rowspan="2">Outcomes</th><th colspan="2">Anticipated absolute effects* (95% CI)</th><th rowspan="2">Relative effect (95% CI)</th><th rowspan="2">Nº of participants (studies)</th><th rowspan="2">Quality of the evidence (GRADE)</th></tr><tr><th>Risk with susceptibility-based treatment</th><th>Risk with empiric treatment</th></tr><tr><td>Quality of Life - not measured</td><td>-</td><td>-</td><td>-</td><td>-</td><td>-</td></tr><tr><td>Cure of NTM Disease - not reported</td><td>-</td><td>-</td><td>-</td><td>-</td><td>-</td></tr><tr><td>Death</td><td colspan="3">Authors report no significant difference between empiric vs culture-based regimens (80 vs 75%)</td><td>(1 observational study)</td><td>⊕○○○<br/>VERY LOW<sup>1,2,3</sup></td></tr><tr><td>Development of antibiotic resistance - not measured</td><td>-</td><td>-</td><td>-</td><td>-</td><td>-</td></tr><tr><td>Recurrence - not measured</td><td>-</td><td>-</td><td>-</td><td>-</td><td>-</td></tr><tr><td>Culture Conversion - not reported</td><td>-</td><td>-</td><td>-</td><td>-</td><td>-</td></tr></table> | Outcomes                       | Anticipated absolute effects* (95% CI) |                                   | Relative effect (95% CI) | Nº of participants (studies) | Quality of the evidence (GRADE) | Risk with susceptibility-based treatment | Risk with empiric treatment | Quality of Life - not measured | - | - | - | -     | -                                                                                              | Cure of NTM Disease - not reported | - | -                       | -                                 | -                                                   | - | Death | Authors report no significant difference between empiric vs culture-based regimens (80 vs 75%) |   |   | (1 observational study)   | ⊕○○○<br>VERY LOW <sup>1,2,3</sup> | Development of antibiotic resistance - not measured | - | - | - | -                                 | - | Recurrence - not measured | - | - | - | -                                                                                                                                                                                                                                                                | - | Culture Conversion - not reported | - | - | - | - | - | <div>question was felt to be only indirectly related and not useful evidence upon which to base a recommendation. Additionally, it was felt that the methods of performing susceptibility testing were outdated and not relevant to current practice.</div> <div>The utility of <i>in vitro</i> drug susceptibility testing is entirely dependent on the NTM species being treated and the drugs being tested.</div> |
|-----------------------------------------------------|------------------------------------------------------------------------------------------------------------------------------------------------------------------------------------------------------------------------------|---------------------------------------------------------------------------------------------------------------------------------------------------------------------------------------------------------------------------------------------------------------------------------------------------------------------------------------------------------------------------------------------------------------------------------------------------------------------------------------------------------------------------------------------------------------------------------------------------------------------------------------------------------------------------------------------------------------------------------------------------------------------------------------------------------------------------------------------------------------------------------------------------------------------------------------------------------------------------------------------------------------------------------------------------------------------------------------------------------------------------------------------------------------------------------------------------------------------------|--------------------------------|----------------------------------------|-----------------------------------|--------------------------|------------------------------|---------------------------------|------------------------------------------|-----------------------------|--------------------------------|---|---|---|-------|------------------------------------------------------------------------------------------------|------------------------------------|---|-------------------------|-----------------------------------|-----------------------------------------------------|---|-------|------------------------------------------------------------------------------------------------|---|---|---------------------------|-----------------------------------|-----------------------------------------------------|---|---|---|-----------------------------------|---|---------------------------|---|---|---|------------------------------------------------------------------------------------------------------------------------------------------------------------------------------------------------------------------------------------------------------------------|---|-----------------------------------|---|---|---|---|---|----------------------------------------------------------------------------------------------------------------------------------------------------------------------------------------------------------------------------------------------------------------------------------------------------------------------------------------------------------------------------------------------------------------------|
| Outcomes                                            | Anticipated absolute effects* (95% CI)                                                                                                                                                                                       |                                                                                                                                                                                                                                                                                                                                                                                                                                                                                                                                                                                                                                                                                                                                                                                                                                                                                                                                                                                                                                                                                                                                                                                                                           |                                | Relative effect (95% CI)               | Nº of participants (studies)      |                          |                              |                                 | Quality of the evidence (GRADE)          |                             |                                |   |   |   |       |                                                                                                |                                    |   |                         |                                   |                                                     |   |       |                                                                                                |   |   |                           |                                   |                                                     |   |   |   |                                   |   |                           |   |   |   |                                                                                                                                                                                                                                                                  |   |                                   |   |   |   |   |   |                                                                                                                                                                                                                                                                                                                                                                                                                      |
|                                                     | Risk with susceptibility-based treatment                                                                                                                                                                                     | Risk with empiric treatment                                                                                                                                                                                                                                                                                                                                                                                                                                                                                                                                                                                                                                                                                                                                                                                                                                                                                                                                                                                                                                                                                                                                                                                               |                                |                                        |                                   |                          |                              |                                 |                                          |                             |                                |   |   |   |       |                                                                                                |                                    |   |                         |                                   |                                                     |   |       |                                                                                                |   |   |                           |                                   |                                                     |   |   |   |                                   |   |                           |   |   |   |                                                                                                                                                                                                                                                                  |   |                                   |   |   |   |   |   |                                                                                                                                                                                                                                                                                                                                                                                                                      |
| Quality of Life - not measured                      | -                                                                                                                                                                                                                            | -                                                                                                                                                                                                                                                                                                                                                                                                                                                                                                                                                                                                                                                                                                                                                                                                                                                                                                                                                                                                                                                                                                                                                                                                                         | -                              | -                                      | -                                 |                          |                              |                                 |                                          |                             |                                |   |   |   |       |                                                                                                |                                    |   |                         |                                   |                                                     |   |       |                                                                                                |   |   |                           |                                   |                                                     |   |   |   |                                   |   |                           |   |   |   |                                                                                                                                                                                                                                                                  |   |                                   |   |   |   |   |   |                                                                                                                                                                                                                                                                                                                                                                                                                      |
| Cure of NTM Disease - not reported                  | -                                                                                                                                                                                                                            | -                                                                                                                                                                                                                                                                                                                                                                                                                                                                                                                                                                                                                                                                                                                                                                                                                                                                                                                                                                                                                                                                                                                                                                                                                         | -                              | -                                      | -                                 |                          |                              |                                 |                                          |                             |                                |   |   |   |       |                                                                                                |                                    |   |                         |                                   |                                                     |   |       |                                                                                                |   |   |                           |                                   |                                                     |   |   |   |                                   |   |                           |   |   |   |                                                                                                                                                                                                                                                                  |   |                                   |   |   |   |   |   |                                                                                                                                                                                                                                                                                                                                                                                                                      |
| Death                                               | Authors report no significant difference between empiric vs culture-based regimens (80 vs 75%)                                                                                                                               |                                                                                                                                                                                                                                                                                                                                                                                                                                                                                                                                                                                                                                                                                                                                                                                                                                                                                                                                                                                                                                                                                                                                                                                                                           |                                | (1 observational study)                | ⊕○○○<br>VERY LOW <sup>1,2,3</sup> |                          |                              |                                 |                                          |                             |                                |   |   |   |       |                                                                                                |                                    |   |                         |                                   |                                                     |   |       |                                                                                                |   |   |                           |                                   |                                                     |   |   |   |                                   |   |                           |   |   |   |                                                                                                                                                                                                                                                                  |   |                                   |   |   |   |   |   |                                                                                                                                                                                                                                                                                                                                                                                                                      |
| Development of antibiotic resistance - not measured | -                                                                                                                                                                                                                            | -                                                                                                                                                                                                                                                                                                                                                                                                                                                                                                                                                                                                                                                                                                                                                                                                                                                                                                                                                                                                                                                                                                                                                                                                                         | -                              | -                                      | -                                 |                          |                              |                                 |                                          |                             |                                |   |   |   |       |                                                                                                |                                    |   |                         |                                   |                                                     |   |       |                                                                                                |   |   |                           |                                   |                                                     |   |   |   |                                   |   |                           |   |   |   |                                                                                                                                                                                                                                                                  |   |                                   |   |   |   |   |   |                                                                                                                                                                                                                                                                                                                                                                                                                      |
| Recurrence - not measured                           | -                                                                                                                                                                                                                            | -                                                                                                                                                                                                                                                                                                                                                                                                                                                                                                                                                                                                                                                                                                                                                                                                                                                                                                                                                                                                                                                                                                                                                                                                                         | -                              | -                                      | -                                 |                          |                              |                                 |                                          |                             |                                |   |   |   |       |                                                                                                |                                    |   |                         |                                   |                                                     |   |       |                                                                                                |   |   |                           |                                   |                                                     |   |   |   |                                   |   |                           |   |   |   |                                                                                                                                                                                                                                                                  |   |                                   |   |   |   |   |   |                                                                                                                                                                                                                                                                                                                                                                                                                      |
| Culture Conversion - not reported                   | -                                                                                                                                                                                                                            | -                                                                                                                                                                                                                                                                                                                                                                                                                                                                                                                                                                                                                                                                                                                                                                                                                                                                                                                                                                                                                                                                                                                                                                                                                         | -                              | -                                      | -                                 |                          |                              |                                 |                                          |                             |                                |   |   |   |       |                                                                                                |                                    |   |                         |                                   |                                                     |   |       |                                                                                                |   |   |                           |                                   |                                                     |   |   |   |                                   |   |                           |   |   |   |                                                                                                                                                                                                                                                                  |   |                                   |   |   |   |   |   |                                                                                                                                                                                                                                                                                                                                                                                                                      |
| UNDESIRABLE EFFECTS                                 | <div>How substantial are the undesirable anticipated effects?</div> <div><div><div>○ Large</div><div>○ Moderate</div><div>○ Small</div><div>○ Trivial</div></div><div><div>○ Varies</div><div>● Don't know</div></div></div> | <table><tr><td>Quality of Life - not measured</td><td>-</td><td>-</td><td>-</td><td>-</td><td>-</td></tr><tr><td>Cure of NTM Disease - not reported</td><td>-</td><td>-</td><td>-</td><td>-</td><td>-</td></tr><tr><td>Death</td><td colspan="3">Authors report no significant difference between empiric vs culture-based regimens (80 vs 75%)</td><td>(1 observational study)</td><td>⊕○○○<br/>VERY LOW<sup>1,2,3</sup></td></tr><tr><td>Development of antibiotic resistance - not measured</td><td>-</td><td>-</td><td>-</td><td>-</td><td>-</td></tr><tr><td>Recurrence - not measured</td><td>-</td><td>-</td><td>-</td><td>-</td><td>-</td></tr><tr><td>Culture Conversion - not reported</td><td>-</td><td>-</td><td>-</td><td>-</td><td>-</td></tr></table>                                                                                                                                                                                                                                                                                                                                                                                                                                                      | Quality of Life - not measured | -                                      | -                                 | -                        | -                            | -                               | Cure of NTM Disease - not reported       | -                           | -                              | - | - | - | Death | Authors report no significant difference between empiric vs culture-based regimens (80 vs 75%) |                                    |   | (1 observational study) | ⊕○○○<br>VERY LOW <sup>1,2,3</sup> | Development of antibiotic resistance - not measured | - | -     | -                                                                                              | - | - | Recurrence - not measured | -                                 | -                                                   | - | - | - | Culture Conversion - not reported | - | -                         | - | - | - | <div>The results of standardized and validated drug susceptibility testing are useful for guiding treatment, in particular for drugs where there has been a correlation between <i>in vitro</i> activity and treatment outcome, e.g. macrolides, amikacin.</div> |   |                                   |   |   |   |   |   |                                                                                                                                                                                                                                                                                                                                                                                                                      |
| Quality of Life - not measured                      | -                                                                                                                                                                                                                            | -                                                                                                                                                                                                                                                                                                                                                                                                                                                                                                                                                                                                                                                                                                                                                                                                                                                                                                                                                                                                                                                                                                                                                                                                                         | -                              | -                                      | -                                 |                          |                              |                                 |                                          |                             |                                |   |   |   |       |                                                                                                |                                    |   |                         |                                   |                                                     |   |       |                                                                                                |   |   |                           |                                   |                                                     |   |   |   |                                   |   |                           |   |   |   |                                                                                                                                                                                                                                                                  |   |                                   |   |   |   |   |   |                                                                                                                                                                                                                                                                                                                                                                                                                      |
| Cure of NTM Disease - not reported                  | -                                                                                                                                                                                                                            | -                                                                                                                                                                                                                                                                                                                                                                                                                                                                                                                                                                                                                                                                                                                                                                                                                                                                                                                                                                                                                                                                                                                                                                                                                         | -                              | -                                      | -                                 |                          |                              |                                 |                                          |                             |                                |   |   |   |       |                                                                                                |                                    |   |                         |                                   |                                                     |   |       |                                                                                                |   |   |                           |                                   |                                                     |   |   |   |                                   |   |                           |   |   |   |                                                                                                                                                                                                                                                                  |   |                                   |   |   |   |   |   |                                                                                                                                                                                                                                                                                                                                                                                                                      |
| Death                                               | Authors report no significant difference between empiric vs culture-based regimens (80 vs 75%)                                                                                                                               |                                                                                                                                                                                                                                                                                                                                                                                                                                                                                                                                                                                                                                                                                                                                                                                                                                                                                                                                                                                                                                                                                                                                                                                                                           |                                | (1 observational study)                | ⊕○○○<br>VERY LOW <sup>1,2,3</sup> |                          |                              |                                 |                                          |                             |                                |   |   |   |       |                                                                                                |                                    |   |                         |                                   |                                                     |   |       |                                                                                                |   |   |                           |                                   |                                                     |   |   |   |                                   |   |                           |   |   |   |                                                                                                                                                                                                                                                                  |   |                                   |   |   |   |   |   |                                                                                                                                                                                                                                                                                                                                                                                                                      |
| Development of antibiotic resistance - not measured | -                                                                                                                                                                                                                            | -                                                                                                                                                                                                                                                                                                                                                                                                                                                                                                                                                                                                                                                                                                                                                                                                                                                                                                                                                                                                                                                                                                                                                                                                                         | -                              | -                                      | -                                 |                          |                              |                                 |                                          |                             |                                |   |   |   |       |                                                                                                |                                    |   |                         |                                   |                                                     |   |       |                                                                                                |   |   |                           |                                   |                                                     |   |   |   |                                   |   |                           |   |   |   |                                                                                                                                                                                                                                                                  |   |                                   |   |   |   |   |   |                                                                                                                                                                                                                                                                                                                                                                                                                      |
| Recurrence - not measured                           | -                                                                                                                                                                                                                            | -                                                                                                                                                                                                                                                                                                                                                                                                                                                                                                                                                                                                                                                                                                                                                                                                                                                                                                                                                                                                                                                                                                                                                                                                                         | -                              | -                                      | -                                 |                          |                              |                                 |                                          |                             |                                |   |   |   |       |                                                                                                |                                    |   |                         |                                   |                                                     |   |       |                                                                                                |   |   |                           |                                   |                                                     |   |   |   |                                   |   |                           |   |   |   |                                                                                                                                                                                                                                                                  |   |                                   |   |   |   |   |   |                                                                                                                                                                                                                                                                                                                                                                                                                      |
| Culture Conversion - not reported                   | -                                                                                                                                                                                                                            | -                                                                                                                                                                                                                                                                                                                                                                                                                                                                                                                                                                                                                                                                                                                                                                                                                                                                                                                                                                                                                                                                                                                                                                                                                         | -                              | -                                      | -                                 |                          |                              |                                 |                                          |                             |                                |   |   |   |       |                                                                                                |                                    |   |                         |                                   |                                                     |   |       |                                                                                                |   |   |                           |                                   |                                                     |   |   |   |                                   |   |                           |   |   |   |                                                                                                                                                                                                                                                                  |   |                                   |   |   |   |   |   |                                                                                                                                                                                                                                                                                                                                                                                                                      |

| CERTAINTY OF EVIDENCE                | <p><b>What is the overall certainty of the evidence of effects?</b></p> <ul style="list-style-type: none"><li>● Very low<ul style="list-style-type: none"><li>○ Low</li><li>○ Moderate</li><li>○ High</li></ul></li><li>○ No included studies</li></ul>                                                                                                                   | <p><b>The relative importance or values of the main outcomes of interest:</b></p> <table><thead><tr><th>Outcome</th><th>Relative importance</th><th>Certainty of the evidence (GRADE)</th></tr></thead><tbody><tr><td>Quality of Life</td><td>CRITICAL</td><td>(not measured)</td></tr><tr><td>Cure of NTM Disease</td><td>CRITICAL</td><td>(not measured)</td></tr><tr><td>Death</td><td>CRITICAL</td><td>⊕○○○<br/>VERY LOW</td></tr><tr><td>Development of antibiotic resistance</td><td>CRITICAL</td><td>(not measured)</td></tr><tr><td>Recurrence</td><td>CRITICAL</td><td>(not measured)</td></tr><tr><td>Culture Conversion</td><td>CRITICAL</td><td>(not measured)</td></tr></tbody></table>                                                                                                                                                                                                                                                                                                                                                                                                                                                                     | Outcome | Relative importance | Certainty of the evidence (GRADE) | Quality of Life | CRITICAL | (not measured) | Cure of NTM Disease | CRITICAL | (not measured) | Death | CRITICAL | ⊕○○○<br>VERY LOW | Development of antibiotic resistance | CRITICAL | (not measured) | Recurrence | CRITICAL | (not measured) | Culture Conversion | CRITICAL | (not measured) |  |
|--------------------------------------|---------------------------------------------------------------------------------------------------------------------------------------------------------------------------------------------------------------------------------------------------------------------------------------------------------------------------------------------------------------------------|--------------------------------------------------------------------------------------------------------------------------------------------------------------------------------------------------------------------------------------------------------------------------------------------------------------------------------------------------------------------------------------------------------------------------------------------------------------------------------------------------------------------------------------------------------------------------------------------------------------------------------------------------------------------------------------------------------------------------------------------------------------------------------------------------------------------------------------------------------------------------------------------------------------------------------------------------------------------------------------------------------------------------------------------------------------------------------------------------------------------------------------------------------------------------|---------|---------------------|-----------------------------------|-----------------|----------|----------------|---------------------|----------|----------------|-------|----------|------------------|--------------------------------------|----------|----------------|------------|----------|----------------|--------------------|----------|----------------|--|
| Outcome                              | Relative importance                                                                                                                                                                                                                                                                                                                                                       | Certainty of the evidence (GRADE)                                                                                                                                                                                                                                                                                                                                                                                                                                                                                                                                                                                                                                                                                                                                                                                                                                                                                                                                                                                                                                                                                                                                        |         |                     |                                   |                 |          |                |                     |          |                |       |          |                  |                                      |          |                |            |          |                |                    |          |                |  |
| Quality of Life                      | CRITICAL                                                                                                                                                                                                                                                                                                                                                                  | (not measured)                                                                                                                                                                                                                                                                                                                                                                                                                                                                                                                                                                                                                                                                                                                                                                                                                                                                                                                                                                                                                                                                                                                                                           |         |                     |                                   |                 |          |                |                     |          |                |       |          |                  |                                      |          |                |            |          |                |                    |          |                |  |
| Cure of NTM Disease                  | CRITICAL                                                                                                                                                                                                                                                                                                                                                                  | (not measured)                                                                                                                                                                                                                                                                                                                                                                                                                                                                                                                                                                                                                                                                                                                                                                                                                                                                                                                                                                                                                                                                                                                                                           |         |                     |                                   |                 |          |                |                     |          |                |       |          |                  |                                      |          |                |            |          |                |                    |          |                |  |
| Death                                | CRITICAL                                                                                                                                                                                                                                                                                                                                                                  | ⊕○○○<br>VERY LOW                                                                                                                                                                                                                                                                                                                                                                                                                                                                                                                                                                                                                                                                                                                                                                                                                                                                                                                                                                                                                                                                                                                                                         |         |                     |                                   |                 |          |                |                     |          |                |       |          |                  |                                      |          |                |            |          |                |                    |          |                |  |
| Development of antibiotic resistance | CRITICAL                                                                                                                                                                                                                                                                                                                                                                  | (not measured)                                                                                                                                                                                                                                                                                                                                                                                                                                                                                                                                                                                                                                                                                                                                                                                                                                                                                                                                                                                                                                                                                                                                                           |         |                     |                                   |                 |          |                |                     |          |                |       |          |                  |                                      |          |                |            |          |                |                    |          |                |  |
| Recurrence                           | CRITICAL                                                                                                                                                                                                                                                                                                                                                                  | (not measured)                                                                                                                                                                                                                                                                                                                                                                                                                                                                                                                                                                                                                                                                                                                                                                                                                                                                                                                                                                                                                                                                                                                                                           |         |                     |                                   |                 |          |                |                     |          |                |       |          |                  |                                      |          |                |            |          |                |                    |          |                |  |
| Culture Conversion                   | CRITICAL                                                                                                                                                                                                                                                                                                                                                                  | (not measured)                                                                                                                                                                                                                                                                                                                                                                                                                                                                                                                                                                                                                                                                                                                                                                                                                                                                                                                                                                                                                                                                                                                                                           |         |                     |                                   |                 |          |                |                     |          |                |       |          |                  |                                      |          |                |            |          |                |                    |          |                |  |
| VALUES                               | <p><b>Is there important uncertainty about or variability in how much people value the main outcomes?</b></p> <ul style="list-style-type: none"><li>○ Important uncertainty or variability</li><li>● Possibly important uncertainty or variability</li><li>○ Probably no important uncertainty or variability</li><li>○ No important uncertainty or variability</li></ul> | <p>Values and preferences:</p> <p>Three relevant studies were identified that provide data on patient values and preferences:</p> <p>Mehta and Marras, 2011 evaluated the impact of pulmonary NTM on health-related quality of life. In this study, patients with pulmonary NTM had significantly impaired health-related quality of life with two QOL measures significantly lower than historical normal controls. Multivariable analysis showed an association between QOL scores and lung function</p> <p>Hong, et al, 2014 also evaluated the impact of pulmonary NTM on health-related quality of life. This was a direct comparison between patients with NTM disease and healthy subjects and found patients with NTM reported more health status issues and anxiety/depression issues than healthy controls. Lung function was also independently associated with QOL scores.</p> <p>Czaja, et al 2015 evaluated change in quality of life in response to various treatment regimens for <i>M. abscessus</i> (many patients had coinfection with MAC or Pseudomonas). Mean QOL score was significantly improved after treatment at 3, 6, 12, and 24 months.</p> |         |                     |                                   |                 |          |                |                     |          |                |       |          |                  |                                      |          |                |            |          |                |                    |          |                |  |



**Does the balance between desirable and undesirable effects favor the intervention or the comparison?**

- Favors the comparison
- Probably favors the comparison
- Does not favor either the intervention or the comparison
- Probably favors the intervention
- Favors the intervention
  
- Varies
- Don't know

**Empiric treatment compared to susceptibility-based treatment for NTM pulmonary infection**

| Outcomes                                            | Anticipated absolute effects* (95% CI)                                                         |                             | Relative effect (95% CI) | N° of participants (studies) | Quality of the evidence (GRADE)   |
|-----------------------------------------------------|------------------------------------------------------------------------------------------------|-----------------------------|--------------------------|------------------------------|-----------------------------------|
|                                                     | Risk with susceptibility-based treatment                                                       | Risk with empiric treatment |                          |                              |                                   |
| Quality of Life - not measured                      | -                                                                                              | -                           | -                        | -                            | -                                 |
| Cure of NTM Disease - not reported                  | -                                                                                              | -                           | -                        | -                            | -                                 |
| Death                                               | Authors report no significant difference between empiric vs culture-based regimens (80 vs 75%) |                             |                          | (1 observational study)      | ⊕○○○<br>VERY LOW <sup>1,2,3</sup> |
| Development of antibiotic resistance - not measured | -                                                                                              | -                           | -                        | -                            | -                                 |
| Recurrence - not measured                           | -                                                                                              | -                           | -                        | -                            | -                                 |
| Culture Conversion - not reported                   | -                                                                                              | -                           | -                        | -                            | -                                 |

There are other studies such as those by Jenkins, et al (Resp Med 2003) referenced in the Andrejak paper that measured outcomes of interest for two different treatment regimens for *M. xenopi* and looked to see whether outcomes were different based on resistance patterns on *in vitro* susceptibility tests (in this study they were not for the 29/40 patients who had the tests performed). In the observational study of *M. abscessus* treatment results by Jeon, et al (Am J Respir Crit Care Med 2009), the authors compared microbiologic response based on results of *in vitro* susceptibility testing and found a significant correlation for clarithromycin but not for the other antibiotics tested. The study by Kobashi, et al (J Infect Chemother 2006) showed similar findings for patients with *M. avium* complex disease with good correlation between clarithromycin susceptibility and clinical outcomes and no correlation for the other tested drugs. While these studies don't look at treatment modified based on *in vitro* susceptibility tests, they do provide some insight into this question.

|                    |                                                                                                                                                                                                                                                                                                                                                                                                                                 |                    |  |
|--------------------|---------------------------------------------------------------------------------------------------------------------------------------------------------------------------------------------------------------------------------------------------------------------------------------------------------------------------------------------------------------------------------------------------------------------------------|--------------------|--|
|                    |                                                                                                                                                                                                                                                                                                                                                                                                                                 |                    |  |
| RESOURCES REQUIRED | <p><b>How large are the resource requirements (costs)?</b></p> <ul style="list-style-type: none"> <li>○ Large costs</li> <li>○ Moderate costs</li> <li>○ Negligible costs and savings</li> <li>○ Moderate savings</li> <li>○ Large savings</li> <li>● Varies</li> <li>○ Don't know</li> </ul>                                                                                                                                   | No data available. |  |
| COST EFFECTIVENESS | <p><b>Does the cost-effectiveness of the intervention favor the intervention or the comparison?</b></p> <ul style="list-style-type: none"> <li>○ Favors the comparison</li> <li>○ Probably favors the comparison</li> <li>○ Does not favor either the intervention or the comparison</li> <li>○ Probably favors the intervention</li> <li>○ Favors the intervention</li> <li>● Varies</li> <li>○ No included studies</li> </ul> | No data available. |  |
| EQUITY             | <p><b>What would be the impact on health equity?</b></p> <ul style="list-style-type: none"> <li>○ Reduced</li> <li>○ Probably reduced</li> <li>● Probably no impact</li> <li>○ Probably increased</li> <li>○ Increased</li> </ul>                                                                                                                                                                                               | No data available. |  |

|               |                                                                                                                                                                                                                                                                         |                                                                                                                                                                                                                                                                                                                                                                                      |  |
|---------------|-------------------------------------------------------------------------------------------------------------------------------------------------------------------------------------------------------------------------------------------------------------------------|--------------------------------------------------------------------------------------------------------------------------------------------------------------------------------------------------------------------------------------------------------------------------------------------------------------------------------------------------------------------------------------|--|
|               | <ul style="list-style-type: none"> <li>○ Varies</li> <li>○ Don't know</li> </ul>                                                                                                                                                                                        |                                                                                                                                                                                                                                                                                                                                                                                      |  |
| ACCEPTABILITY | <p><b>Is the intervention acceptable to key stakeholders?</b></p> <ul style="list-style-type: none"> <li>○ No</li> <li>○ Probably no</li> <li>● Probably yes</li> <li>○ Yes</li> </ul> <ul style="list-style-type: none"> <li>○ Varies</li> <li>○ Don't know</li> </ul> | No data available.                                                                                                                                                                                                                                                                                                                                                                   |  |
| FEASIBILITY   | <p><b>Is the intervention feasible to implement?</b></p> <ul style="list-style-type: none"> <li>○ No</li> <li>○ Probably no</li> <li>● Probably yes</li> <li>○ Yes</li> </ul> <ul style="list-style-type: none"> <li>○ Varies</li> <li>○ Don't know</li> </ul>          | A study by Adjemian, et al in 2014 evaluated treatment of <i>M. abscessus</i> and MAC, looking at compliance with the 2007 ATS/IDSA guidelines. This study found poor adherence with only 13% of antibiotic regimens compliant with guidelines. Of prescribed regimens for MAC, only 44% contained a macrolide, while 36% of regimens for <i>M. abscessus</i> contained a macrolide. |  |

## Summary of judgments

|                              | JUDGEMENT                            |                                                      |                                                          |                                         |                         |               |                     | IMPLICATIONS |
|------------------------------|--------------------------------------|------------------------------------------------------|----------------------------------------------------------|-----------------------------------------|-------------------------|---------------|---------------------|--------------|
| <b>DESIRABLE EFFECTS</b>     | Trivial                              | Small                                                | Moderate                                                 | Large                                   |                         | Varies        | <b>Don't know</b>   |              |
| <b>UNDESIRABLE EFFECTS</b>   | Large                                | Moderate                                             | Small                                                    | Trivial                                 |                         | Varies        | <b>Don't know</b>   |              |
| <b>CERTAINTY OF EVIDENCE</b> | <b>Very low</b>                      | Low                                                  | Moderate                                                 | High                                    |                         |               | No included studies |              |
| <b>VALUES</b>                | Important uncertainty or variability | <b>Possibly important uncertainty or variability</b> | Probably no important uncertainty or variability         | No important uncertainty or variability |                         |               |                     |              |
| <b>BALANCE OF EFFECTS</b>    | Favors the comparison                | Probably favors the comparison                       | Does not favor either the intervention or the comparison | Probably favors the intervention        | Favors the intervention | Varies        | <b>Don't know</b>   |              |
| <b>RESOURCES REQUIRED</b>    | Large costs                          | Moderate costs                                       | Negligible costs and savings                             | Moderate savings                        | Large savings           | <b>Varies</b> | Don't know          |              |
| <b>COST EFFECTIVENESS</b>    | Favors the comparison                | Probably favors the comparison                       | Does not favor either the intervention or the comparison | Probably favors the intervention        | Favors the intervention | <b>Varies</b> | No included studies |              |
| <b>EQUITY</b>                | Reduced                              | Probably reduced                                     | <b>Probably no impact</b>                                | Probably increased                      | Increased               | Varies        | Don't know          |              |
| <b>ACCEPTABILITY</b>         | No                                   | Probably no                                          | <b>Probably yes</b>                                      | Yes                                     |                         | Varies        | Don't know          |              |
| <b>FEASIBILITY</b>           | No                                   | Probably no                                          | <b>Probably yes</b>                                      | Yes                                     |                         | Varies        | Don't know          |              |

## Conclusions

## Should patients with NTM pulmonary disease be treated empirically or based on *in vitro* drug susceptibility test results?

| TYPE OF RECOMMENDATION        | Strong recommendation against the intervention<br><br>○                                                                                                                                                                                                                                                                                                                                                                                                                                                                                                                                                                                                                                                                                                                                                                                                                                                                                                                                                                                                                                                                                                                                                                                                                                                                                                                                        | Conditional recommendation against the intervention<br><br>○ | Conditional recommendation for either the intervention or the comparison<br><br>○ | Conditional recommendation for the intervention<br><br>● | Strong recommendation for the intervention<br><br>○ |
|-------------------------------|------------------------------------------------------------------------------------------------------------------------------------------------------------------------------------------------------------------------------------------------------------------------------------------------------------------------------------------------------------------------------------------------------------------------------------------------------------------------------------------------------------------------------------------------------------------------------------------------------------------------------------------------------------------------------------------------------------------------------------------------------------------------------------------------------------------------------------------------------------------------------------------------------------------------------------------------------------------------------------------------------------------------------------------------------------------------------------------------------------------------------------------------------------------------------------------------------------------------------------------------------------------------------------------------------------------------------------------------------------------------------------------------|--------------------------------------------------------------|-----------------------------------------------------------------------------------|----------------------------------------------------------|-----------------------------------------------------|
| RECOMMENDATION                | <p>In patients with MAC pulmonary disease, we suggest susceptibility-based treatment for macrolides and amikacin (conditional recommendation, very low confidence in estimates of effect).</p> <p>In patients with <i>M. kansasii</i> pulmonary disease, we suggest susceptibility-based treatment for rifampicin (conditional recommendation, very low confidence in estimates of effect).</p> <p>In patients with <i>M. xenopi</i> pulmonary disease, the committee feels there is insufficient evidence to make a recommendation for or against susceptibility-based treatment.</p> <p>In patients with <i>M. abscessus</i> pulmonary disease we suggest susceptibility-based treatment for macrolides and amikacin (conditional recommendation, very low confidence in estimates of effect). For macrolides, a 14-day incubation and/or sequencing of the <i>erm</i>(41) gene should be performed to evaluate for potential inducible macrolide resistance. While we recommend testing of other drugs in order to guide <i>M. abscessus</i> therapy there is insufficient data to make specific recommendations in this regard.</p> <p>The panel members voted unanimously for a conditional recommendation for the intervention with regards to MAC <i>M. kansasii</i>, and <i>M. abscessus</i>. The panel members also voted unanimously for no recommendation for <i>M. xenopi</i>.</p> |                                                              |                                                                                   |                                                          |                                                     |
| JUSTIFICATION                 | <p>There is indirect evidence of poor outcomes in cases of macrolide or amikacin resistance. There is evidence from randomized clinical trials that correlated <i>in vitro</i> activity with amikacin and treatment outcomes.</p> <p>Although <i>in vitro-in vivo</i> correlations have not yet been proven for all major antimycobacterial drugs and some drugs are in regimens for synergy rather than efficacy, baseline susceptibility testing is recommended according to the CLSI guidelines for NTM isolates from patients with definite disease.</p>                                                                                                                                                                                                                                                                                                                                                                                                                                                                                                                                                                                                                                                                                                                                                                                                                                   |                                                              |                                                                                   |                                                          |                                                     |
| SUBGROUP CONSIDERATIONS       |                                                                                                                                                                                                                                                                                                                                                                                                                                                                                                                                                                                                                                                                                                                                                                                                                                                                                                                                                                                                                                                                                                                                                                                                                                                                                                                                                                                                |                                                              |                                                                                   |                                                          |                                                     |
| IMPLEMENTATION CONSIDERATIONS | <p>While the available evidence may be scarce, there is a need for proper drug susceptibility testing in guiding therapy. If acquired resistance can be ruled out, AST may not be required if proper species /subspecies identification is done, as drug susceptibility to a large extent is a species /subspecies specific character. However, for certain species/drug combinations there is also</p>                                                                                                                                                                                                                                                                                                                                                                                                                                                                                                                                                                                                                                                                                                                                                                                                                                                                                                                                                                                        |                                                              |                                                                                   |                                                          |                                                     |

|                                  |                                                                                                                                                                                                         |
|----------------------------------|---------------------------------------------------------------------------------------------------------------------------------------------------------------------------------------------------------|
|                                  | significant drug heterogeneity, e.g. tetracyclines and <i>M. abscessus</i> subsp. <i>abscessus</i> and <i>M. fortuitum</i> . The molecular basis for this intra-species heterogeneity is not known yet. |
| <b>MONITORING AND EVALUATION</b> |                                                                                                                                                                                                         |
| <b>RESEARCH PRIORITIES</b>       | Quality clinical trials of fixed vs susceptibility-guided regimens for different species of NTM.                                                                                                        |

**Table E4.3. Question III**

## Should macrolide-susceptible MAC pulmonary disease be treated with a three-drug regimen with a macrolide or without a macrolide?

|                       |                                                                                                                                                                |
|-----------------------|----------------------------------------------------------------------------------------------------------------------------------------------------------------|
| <b>POPULATION:</b>    | treatment of MAC pulmonary infection                                                                                                                           |
| <b>INTERVENTION:</b>  | three drugs with a macrolide                                                                                                                                   |
| <b>COMPARISON:</b>    | three drugs without a macrolide                                                                                                                                |
| <b>MAIN OUTCOMES:</b> | Cure of NTM; Death; Recurrence (relapse); Culture conversion; Any adverse effect; Serious adverse effect; Withdrawal owing to adverse effect; Quality of Life; |

## Assessment

| JUDGEMENT                                                                                                                                                                                                                                                                                                                                                                                                                                                                                                                                                                                                                                                                                                                                                                                                                                |                                                                                                                                                                                                                         | RESEARCH EVIDENCE |                                           |                                        |                          |                              |                                 | ADDITIONAL CONSIDERATIONS |                        |                               |                                 |  |                            |
|------------------------------------------------------------------------------------------------------------------------------------------------------------------------------------------------------------------------------------------------------------------------------------------------------------------------------------------------------------------------------------------------------------------------------------------------------------------------------------------------------------------------------------------------------------------------------------------------------------------------------------------------------------------------------------------------------------------------------------------------------------------------------------------------------------------------------------------|-------------------------------------------------------------------------------------------------------------------------------------------------------------------------------------------------------------------------|-------------------|-------------------------------------------|----------------------------------------|--------------------------|------------------------------|---------------------------------|---------------------------|------------------------|-------------------------------|---------------------------------|--|----------------------------|
| DESIRABLE EFFECTS                                                                                                                                                                                                                                                                                                                                                                                                                                                                                                                                                                                                                                                                                                                                                                                                                        | <p><b>How substantial are the desirable anticipated effects?</b></p> <ul style="list-style-type: none"><li>○ Trivial</li><li>● Small</li><li>○ Moderate</li><li>○ Large</li><li>○ Varies</li><li>○ Don't know</li></ul> | Outcomes          | Anticipated absolute effects* (95% CI)    |                                        | Relative effect (95% CI) | Nº of participants (studies) | Quality of the evidence (GRADE) | Comments                  |                        |                               |                                 |  |                            |
|                                                                                                                                                                                                                                                                                                                                                                                                                                                                                                                                                                                                                                                                                                                                                                                                                                          |                                                                                                                                                                                                                         |                   | Risk with three drugs without a macrolide | Risk with three drugs with a macrolide |                          |                              |                                 |                           |                        |                               |                                 |  |                            |
|                                                                                                                                                                                                                                                                                                                                                                                                                                                                                                                                                                                                                                                                                                                                                                                                                                          |                                                                                                                                                                                                                         |                   | Cure of NTM                               | Study population                       |                          |                              |                                 |                           | RR 0.93 (0.62 to 1.37) | 190 (2 observational studies) | ⊕○○○<br>VERY LOW <sup>a b</sup> |  |                            |
|                                                                                                                                                                                                                                                                                                                                                                                                                                                                                                                                                                                                                                                                                                                                                                                                                                          |                                                                                                                                                                                                                         |                   |                                           | 354 per 1,000                          |                          |                              |                                 |                           |                        |                               |                                 |  | 329 per 1,000 (220 to 485) |
|                                                                                                                                                                                                                                                                                                                                                                                                                                                                                                                                                                                                                                                                                                                                                                                                                                          |                                                                                                                                                                                                                         |                   | Death                                     | Study population                       |                          |                              |                                 |                           | RR 1.61                | 170                           | ⊕○○○                            |  |                            |
| <p>The committee felt that macrolide regimens are more effective based on their clinical experience and retrospective cohort studies. There were a number of concerns with the two studies included from the literature search. These concerns included the small sample size in the studies, under-dosing of the macrolide used in the studies, and a population not representative of usual clinical practice. Additionally, the overall mortality seen in the one study that had this outcome was noted to be quite large for this disease, raising question to the validity of this result.</p> <p>The committee unanimously felt that macrolides are a critical component to MAC treatment. Although one study appeared to have higher death rates in patients on a macrolide-containing regimen than on a regimen without, the</p> |                                                                                                                                                                                                                         |                   |                                           |                                        |                          |                              |                                 |                           |                        |                               |                                 |  |                            |

The committee felt that macrolide regimens are more effective based on their clinical experience and retrospective cohort studies. There were a number of concerns with the two studies included from the literature search. These concerns included the small sample size in the studies, underdosing of the macrolide used in the studies, and a population not representative of usual clinical practice. Additionally, the overall mortality seen in the one study that had this outcome was noted to be quite large for this disease, raising question to the validity of this result.

The committee unanimously felt that macrolides are a critical component to MAC treatment. Although one study appeared to have higher death rates in patients on a macrolide-containing regimen than on a regimen without, the

|                     |                                                                                                                                                      |                                    |                  |                                        |                                  |                                  |                                   |  |                                                                                 |
|---------------------|------------------------------------------------------------------------------------------------------------------------------------------------------|------------------------------------|------------------|----------------------------------------|----------------------------------|----------------------------------|-----------------------------------|--|---------------------------------------------------------------------------------|
| UNDESIRABLE EFFECTS |                                                                                                                                                      |                                    | 299 per 1,000    | <b>481 per 1,000</b><br>(326 to 714)   | (1.09 to 2.39)                   | (1 observational study)          | VERY LOW <sup>a b</sup>           |  | committee felt this study was not applicable for the reasons previously stated. |
|                     | <b>How substantial are the undesirable anticipated effects?</b><br><br>○ Large<br>○ Moderate<br>● Small<br>○ Trivial<br><br>○ Varies<br>○ Don't know | Recurrence (relapse)               | Study population |                                        | <b>RR 0.87</b><br>(0.37 to 2.01) | 190<br>(2 observational studies) | ⊕○○○<br>VERY LOW <sup>a b</sup>   |  |                                                                                 |
|                     |                                                                                                                                                      |                                    | 104 per 1,000    | <b>91 per 1,000</b><br>(39 to 209)     |                                  |                                  |                                   |  |                                                                                 |
|                     |                                                                                                                                                      | Culture conversion                 | Study population |                                        | <b>RR 0.98</b><br>(0.67 to 1.43) | 197<br>(2 observational studies) | ⊕○○○<br>VERY LOW <sup>a b c</sup> |  |                                                                                 |
|                     |                                                                                                                                                      |                                    | 850 per 1,000    | <b>833 per 1,000</b><br>(570 to 1,000) |                                  |                                  |                                   |  |                                                                                 |
|                     |                                                                                                                                                      | Any adverse effect                 | Study population |                                        | <b>RR 0.23</b><br>(0.03 to 1.82) | 27<br>(1 RCT)                    | ⊕⊕○○<br>LOW <sup>a b</sup>        |  |                                                                                 |
|                     |                                                                                                                                                      |                                    | 308 per 1,000    | <b>71 per 1,000</b><br>(9 to 560)      |                                  |                                  |                                   |  |                                                                                 |
|                     |                                                                                                                                                      | Serious adverse effect             | Study population |                                        | not estimable                    | 27<br>(1 RCT)                    | ⊕⊕○○<br>LOW <sup>b</sup>          |  |                                                                                 |
|                     |                                                                                                                                                      |                                    | 0 per 1,000      | <b>0 per 1,000</b><br>(0 to 0)         |                                  |                                  |                                   |  |                                                                                 |
|                     |                                                                                                                                                      | Withdrawal owing to adverse effect | Study population |                                        | <b>RR 0.46</b><br>(0.05 to 4.53) | 27<br>(1 RCT)                    | ⊕⊕○○<br>LOW <sup>a b</sup>        |  |                                                                                 |
|                     |                                                                                                                                                      |                                    | 154 per 1,000    | <b>71 per 1,000</b><br>(8 to 697)      |                                  |                                  |                                   |  |                                                                                 |



|                                |                                                                                                                                                                                                                  | <table><tr><td>Quality of Life - not measured</td><td>-</td><td>-</td><td>-</td><td>-</td><td>-</td><td></td></tr></table> <p>a. Wide confidence interval<br/>b. Unclear control for confounders<br/>c. One study favors w/ macrolide and one favors w/o</p>                                                                                                                                                                                                                                                                                                                                                                                                                                                                                                                                                            | Quality of Life - not measured   | -                   | -                                | -           | -        | -                |       |          |                  |                      |          |                  |                    |          |                  |                    |          |             |                        |          |             |                                    |          |             |                 |          |   |  |
|--------------------------------|------------------------------------------------------------------------------------------------------------------------------------------------------------------------------------------------------------------|-------------------------------------------------------------------------------------------------------------------------------------------------------------------------------------------------------------------------------------------------------------------------------------------------------------------------------------------------------------------------------------------------------------------------------------------------------------------------------------------------------------------------------------------------------------------------------------------------------------------------------------------------------------------------------------------------------------------------------------------------------------------------------------------------------------------------|----------------------------------|---------------------|----------------------------------|-------------|----------|------------------|-------|----------|------------------|----------------------|----------|------------------|--------------------|----------|------------------|--------------------|----------|-------------|------------------------|----------|-------------|------------------------------------|----------|-------------|-----------------|----------|---|--|
| Quality of Life - not measured | -                                                                                                                                                                                                                | -                                                                                                                                                                                                                                                                                                                                                                                                                                                                                                                                                                                                                                                                                                                                                                                                                       | -                                | -                   | -                                |             |          |                  |       |          |                  |                      |          |                  |                    |          |                  |                    |          |             |                        |          |             |                                    |          |             |                 |          |   |  |
| CERTAINTY OF EVIDENCE          | <p><b>What is the overall certainty of the evidence of effects?</b></p> <ul style="list-style-type: none"><li>● Very low</li><li>○ Low</li><li>○ Moderate</li><li>○ High</li><li>○ No included studies</li></ul> | <p><b>The relative importance or values of the main outcomes of interest:</b></p> <table><tr><th>Outcome</th><th>Relative importance</th><th>Certainty of the evidence(GRADE)</th></tr><tr><td>Cure of NTM</td><td>CRITICAL</td><td>⊕○○○<br/>VERY LOW</td></tr><tr><td>Death</td><td>CRITICAL</td><td>⊕○○○<br/>VERY LOW</td></tr><tr><td>Recurrence (relapse)</td><td>CRITICAL</td><td>⊕○○○<br/>VERY LOW</td></tr><tr><td>Culture conversion</td><td>CRITICAL</td><td>⊕○○○<br/>VERY LOW</td></tr><tr><td>Any adverse effect</td><td>CRITICAL</td><td>⊕⊕○○<br/>LOW</td></tr><tr><td>Serious adverse effect</td><td>CRITICAL</td><td>⊕⊕○○<br/>LOW</td></tr><tr><td>Withdrawal owing to adverse effect</td><td>CRITICAL</td><td>⊕⊕○○<br/>LOW</td></tr><tr><td>Quality of Life</td><td>CRITICAL</td><td>-</td></tr></table> | Outcome                          | Relative importance | Certainty of the evidence(GRADE) | Cure of NTM | CRITICAL | ⊕○○○<br>VERY LOW | Death | CRITICAL | ⊕○○○<br>VERY LOW | Recurrence (relapse) | CRITICAL | ⊕○○○<br>VERY LOW | Culture conversion | CRITICAL | ⊕○○○<br>VERY LOW | Any adverse effect | CRITICAL | ⊕⊕○○<br>LOW | Serious adverse effect | CRITICAL | ⊕⊕○○<br>LOW | Withdrawal owing to adverse effect | CRITICAL | ⊕⊕○○<br>LOW | Quality of Life | CRITICAL | - |  |
|                                | Outcome                                                                                                                                                                                                          | Relative importance                                                                                                                                                                                                                                                                                                                                                                                                                                                                                                                                                                                                                                                                                                                                                                                                     | Certainty of the evidence(GRADE) |                     |                                  |             |          |                  |       |          |                  |                      |          |                  |                    |          |                  |                    |          |             |                        |          |             |                                    |          |             |                 |          |   |  |
|                                | Cure of NTM                                                                                                                                                                                                      | CRITICAL                                                                                                                                                                                                                                                                                                                                                                                                                                                                                                                                                                                                                                                                                                                                                                                                                | ⊕○○○<br>VERY LOW                 |                     |                                  |             |          |                  |       |          |                  |                      |          |                  |                    |          |                  |                    |          |             |                        |          |             |                                    |          |             |                 |          |   |  |
|                                | Death                                                                                                                                                                                                            | CRITICAL                                                                                                                                                                                                                                                                                                                                                                                                                                                                                                                                                                                                                                                                                                                                                                                                                | ⊕○○○<br>VERY LOW                 |                     |                                  |             |          |                  |       |          |                  |                      |          |                  |                    |          |                  |                    |          |             |                        |          |             |                                    |          |             |                 |          |   |  |
|                                | Recurrence (relapse)                                                                                                                                                                                             | CRITICAL                                                                                                                                                                                                                                                                                                                                                                                                                                                                                                                                                                                                                                                                                                                                                                                                                | ⊕○○○<br>VERY LOW                 |                     |                                  |             |          |                  |       |          |                  |                      |          |                  |                    |          |                  |                    |          |             |                        |          |             |                                    |          |             |                 |          |   |  |
|                                | Culture conversion                                                                                                                                                                                               | CRITICAL                                                                                                                                                                                                                                                                                                                                                                                                                                                                                                                                                                                                                                                                                                                                                                                                                | ⊕○○○<br>VERY LOW                 |                     |                                  |             |          |                  |       |          |                  |                      |          |                  |                    |          |                  |                    |          |             |                        |          |             |                                    |          |             |                 |          |   |  |
|                                | Any adverse effect                                                                                                                                                                                               | CRITICAL                                                                                                                                                                                                                                                                                                                                                                                                                                                                                                                                                                                                                                                                                                                                                                                                                | ⊕⊕○○<br>LOW                      |                     |                                  |             |          |                  |       |          |                  |                      |          |                  |                    |          |                  |                    |          |             |                        |          |             |                                    |          |             |                 |          |   |  |
|                                | Serious adverse effect                                                                                                                                                                                           | CRITICAL                                                                                                                                                                                                                                                                                                                                                                                                                                                                                                                                                                                                                                                                                                                                                                                                                | ⊕⊕○○<br>LOW                      |                     |                                  |             |          |                  |       |          |                  |                      |          |                  |                    |          |                  |                    |          |             |                        |          |             |                                    |          |             |                 |          |   |  |
|                                | Withdrawal owing to adverse effect                                                                                                                                                                               | CRITICAL                                                                                                                                                                                                                                                                                                                                                                                                                                                                                                                                                                                                                                                                                                                                                                                                                | ⊕⊕○○<br>LOW                      |                     |                                  |             |          |                  |       |          |                  |                      |          |                  |                    |          |                  |                    |          |             |                        |          |             |                                    |          |             |                 |          |   |  |
| Quality of Life                | CRITICAL                                                                                                                                                                                                         | -                                                                                                                                                                                                                                                                                                                                                                                                                                                                                                                                                                                                                                                                                                                                                                                                                       |                                  |                     |                                  |             |          |                  |       |          |                  |                      |          |                  |                    |          |                  |                    |          |             |                        |          |             |                                    |          |             |                 |          |   |  |
| VALUES                         | <p><b>Is there important uncertainty about or variability in how</b></p>                                                                                                                                         | Values and preferences:                                                                                                                                                                                                                                                                                                                                                                                                                                                                                                                                                                                                                                                                                                                                                                                                 |                                  |                     |                                  |             |          |                  |       |          |                  |                      |          |                  |                    |          |                  |                    |          |             |                        |          |             |                                    |          |             |                 |          |   |  |

|                    | <p><b>much people value the main outcomes?</b></p> <ul style="list-style-type: none"><li>○ Important uncertainty or variability</li><li>● Possibly important uncertainty or variability</li><li>○ Probably no important uncertainty or variability</li><li>○ No important uncertainty or variability</li></ul>                                                                                                            | <p>Three relevant studies were identified that provide data on patient values and preferences:</p> <p>Mehta and Marras, 2011 evaluated the impact of pulmonary NTM on health-related quality of life. In this study, patients with pulmonary NTM had significantly impaired health-related quality of life with two QOL measures significantly lower than historical normal controls. Multivariable analysis showed an association between QOL scores and lung function.</p> <p>Hong, et al, 2014 also evaluated the impact of pulmonary NTM on health-related quality of life. This was a direct comparison between patients with NTM disease and healthy subjects and found patients with NTM reported more health status issues and anxiety/depression issues than healthy controls. Lung function was also independently associated with QOL scores.</p> <p>Czaja, et al 2015 evaluated change in quality of life in response to various treatment regimens for <i>M. abscessus</i> (many patients had coinfection with MAC or Pseudomonas). Mean QOL score was significantly improved after treatment at 3, 6, 12, and 24 months.</p> |                        |                                        |                              |                          |                              |                                 |          |                                           |                                        |             |                  |  |                        |                               |                              |  |               |                            |       |                  |  |                        |                       |                              |  |         |         |  |
|--------------------|---------------------------------------------------------------------------------------------------------------------------------------------------------------------------------------------------------------------------------------------------------------------------------------------------------------------------------------------------------------------------------------------------------------------------|--------------------------------------------------------------------------------------------------------------------------------------------------------------------------------------------------------------------------------------------------------------------------------------------------------------------------------------------------------------------------------------------------------------------------------------------------------------------------------------------------------------------------------------------------------------------------------------------------------------------------------------------------------------------------------------------------------------------------------------------------------------------------------------------------------------------------------------------------------------------------------------------------------------------------------------------------------------------------------------------------------------------------------------------------------------------------------------------------------------------------------------------|------------------------|----------------------------------------|------------------------------|--------------------------|------------------------------|---------------------------------|----------|-------------------------------------------|----------------------------------------|-------------|------------------|--|------------------------|-------------------------------|------------------------------|--|---------------|----------------------------|-------|------------------|--|------------------------|-----------------------|------------------------------|--|---------|---------|--|
| BALANCE OF EFFECTS | <p><b>Does the balance between desirable and undesirable effects favor the intervention or the comparison?</b></p> <ul style="list-style-type: none"><li>○ Favors the comparison</li><li>○ Probably favors the comparison</li><li>● Does not favor either the intervention or the comparison</li><li>○ Probably favors the intervention</li><li>○ Favors the intervention</li><li>○ Varies</li><li>○ Don't know</li></ul> | <table><tr><th rowspan="2">Outcomes</th><th colspan="2">Anticipated absolute effects* (95% CI)</th><th rowspan="2">Relative effect (95% CI)</th><th rowspan="2">Nº of participants (studies)</th><th rowspan="2">Quality of the evidence (GRADE)</th><th rowspan="2">Comments</th></tr><tr><th>Risk with three drugs without a macrolide</th><th>Risk with three drugs with a macrolide</th></tr><tr><td rowspan="2">Cure of NTM</td><td colspan="2">Study population</td><td rowspan="2">RR 0.93 (0.62 to 1.37)</td><td rowspan="2">190 (2 observational studies)</td><td rowspan="2">⊕○○○ VERY LOW<sup>a b</sup></td><td rowspan="2"></td></tr><tr><td>354 per 1,000</td><td>329 per 1,000 (220 to 485)</td></tr><tr><td rowspan="2">Death</td><td colspan="2">Study population</td><td rowspan="2">RR 1.61 (1.09 to 2.39)</td><td rowspan="2">170 (1 observational)</td><td rowspan="2">⊕○○○ VERY LOW<sup>a b</sup></td><td rowspan="2"></td></tr><tr><td>299 per</td><td>481 per</td></tr></table>                                                                                                                                     | Outcomes               | Anticipated absolute effects* (95% CI) |                              | Relative effect (95% CI) | Nº of participants (studies) | Quality of the evidence (GRADE) | Comments | Risk with three drugs without a macrolide | Risk with three drugs with a macrolide | Cure of NTM | Study population |  | RR 0.93 (0.62 to 1.37) | 190 (2 observational studies) | ⊕○○○ VERY LOW <sup>a b</sup> |  | 354 per 1,000 | 329 per 1,000 (220 to 485) | Death | Study population |  | RR 1.61 (1.09 to 2.39) | 170 (1 observational) | ⊕○○○ VERY LOW <sup>a b</sup> |  | 299 per | 481 per |  |
| Outcomes           | Anticipated absolute effects* (95% CI)                                                                                                                                                                                                                                                                                                                                                                                    |                                                                                                                                                                                                                                                                                                                                                                                                                                                                                                                                                                                                                                                                                                                                                                                                                                                                                                                                                                                                                                                                                                                                            |                        | Relative effect (95% CI)               | Nº of participants (studies) |                          |                              |                                 |          | Quality of the evidence (GRADE)           | Comments                               |             |                  |  |                        |                               |                              |  |               |                            |       |                  |  |                        |                       |                              |  |         |         |  |
|                    | Risk with three drugs without a macrolide                                                                                                                                                                                                                                                                                                                                                                                 | Risk with three drugs with a macrolide                                                                                                                                                                                                                                                                                                                                                                                                                                                                                                                                                                                                                                                                                                                                                                                                                                                                                                                                                                                                                                                                                                     |                        |                                        |                              |                          |                              |                                 |          |                                           |                                        |             |                  |  |                        |                               |                              |  |               |                            |       |                  |  |                        |                       |                              |  |         |         |  |
| Cure of NTM        | Study population                                                                                                                                                                                                                                                                                                                                                                                                          |                                                                                                                                                                                                                                                                                                                                                                                                                                                                                                                                                                                                                                                                                                                                                                                                                                                                                                                                                                                                                                                                                                                                            | RR 0.93 (0.62 to 1.37) | 190 (2 observational studies)          | ⊕○○○ VERY LOW <sup>a b</sup> |                          |                              |                                 |          |                                           |                                        |             |                  |  |                        |                               |                              |  |               |                            |       |                  |  |                        |                       |                              |  |         |         |  |
|                    | 354 per 1,000                                                                                                                                                                                                                                                                                                                                                                                                             | 329 per 1,000 (220 to 485)                                                                                                                                                                                                                                                                                                                                                                                                                                                                                                                                                                                                                                                                                                                                                                                                                                                                                                                                                                                                                                                                                                                 |                        |                                        |                              |                          |                              |                                 |          |                                           |                                        |             |                  |  |                        |                               |                              |  |               |                            |       |                  |  |                        |                       |                              |  |         |         |  |
| Death              | Study population                                                                                                                                                                                                                                                                                                                                                                                                          |                                                                                                                                                                                                                                                                                                                                                                                                                                                                                                                                                                                                                                                                                                                                                                                                                                                                                                                                                                                                                                                                                                                                            | RR 1.61 (1.09 to 2.39) | 170 (1 observational)                  | ⊕○○○ VERY LOW <sup>a b</sup> |                          |                              |                                 |          |                                           |                                        |             |                  |  |                        |                               |                              |  |               |                            |       |                  |  |                        |                       |                              |  |         |         |  |
|                    | 299 per                                                                                                                                                                                                                                                                                                                                                                                                                   | 481 per                                                                                                                                                                                                                                                                                                                                                                                                                                                                                                                                                                                                                                                                                                                                                                                                                                                                                                                                                                                                                                                                                                                                    |                        |                                        |                              |                          |                              |                                 |          |                                           |                                        |             |                  |  |                        |                               |                              |  |               |                            |       |                  |  |                        |                       |                              |  |         |         |  |

|                                    |                  |                                        |                                  |                                  |                                   |  |
|------------------------------------|------------------|----------------------------------------|----------------------------------|----------------------------------|-----------------------------------|--|
|                                    | 1,000            | <b>1,000</b><br>(326 to 714)           |                                  | study)                           |                                   |  |
| Recurrence<br>(relapse)            | Study population |                                        | <b>RR 0.87</b><br>(0.37 to 2.01) | 190<br>(2 observational studies) | ⊕○○○<br>VERY LOW <sup>a b</sup>   |  |
|                                    | 104 per 1,000    | <b>91 per 1,000</b><br>(39 to 209)     |                                  |                                  |                                   |  |
| Culture conversion                 | Study population |                                        | <b>RR 0.98</b><br>(0.67 to 1.43) | 197<br>(2 observational studies) | ⊕○○○<br>VERY LOW <sup>a b c</sup> |  |
|                                    | 850 per 1,000    | <b>833 per 1,000</b><br>(570 to 1,000) |                                  |                                  |                                   |  |
| Any adverse effect                 | Study population |                                        | <b>RR 0.23</b><br>(0.03 to 1.82) | 27<br>(1 RCT)                    | ⊕⊕○○<br>LOW <sup>a b</sup>        |  |
|                                    | 308 per 1,000    | <b>71 per 1,000</b><br>(9 to 560)      |                                  |                                  |                                   |  |
| Serious adverse effect             | Study population |                                        | not estimable                    | 27<br>(1 RCT)                    | ⊕⊕○○<br>LOW <sup>b</sup>          |  |
|                                    | 0 per 1,000      | <b>0 per 1,000</b><br>(0 to 0)         |                                  |                                  |                                   |  |
| Withdrawal owing to adverse effect | Study population |                                        | <b>RR 0.46</b><br>(0.05 to 4.53) | 27<br>(1 RCT)                    | ⊕⊕○○<br>LOW <sup>a b</sup>        |  |
|                                    | 154 per 1,000    | <b>71 per 1,000</b><br>(8 to 697)      |                                  |                                  |                                   |  |
| Quality of Life - not              | -                | -                                      | -                                | -                                | -                                 |  |

|                    |                                                                                                                                                                                                                                                                                                     |                                                                                                                                                                                                                                                                                                                         |  |
|--------------------|-----------------------------------------------------------------------------------------------------------------------------------------------------------------------------------------------------------------------------------------------------------------------------------------------------|-------------------------------------------------------------------------------------------------------------------------------------------------------------------------------------------------------------------------------------------------------------------------------------------------------------------------|--|
|                    |                                                                                                                                                                                                                                                                                                     | <div data-bbox="562 142 1541 222"> <div>measured</div> <div></div> <div></div> <div></div> <div></div> <div></div> <div></div> </div> <div data-bbox="604 261 1199 339"> <p>a. Wide confidence interval</p> <p>b. Unclear control for confounders</p> <p>c. One study favors w/ macrolide and one favors w/o</p> </div> |  |
| RESOURCES REQUIRED | <p><b>How large are the resource requirements (costs)?</b></p> <ul style="list-style-type: none"> <li>○ Large costs</li> <li>○ Moderate costs</li> <li>● Negligible costs and savings</li> <li>○ Moderate savings</li> <li>○ Large savings</li> <br/> <li>○ Varies</li> <li>○ Don't know</li> </ul> | No research evidence was identified.                                                                                                                                                                                                                                                                                    |  |

|                    |                                                                                                                                                                                                                                                                                                                                                                                                                                       |                                      |  |
|--------------------|---------------------------------------------------------------------------------------------------------------------------------------------------------------------------------------------------------------------------------------------------------------------------------------------------------------------------------------------------------------------------------------------------------------------------------------|--------------------------------------|--|
| COST EFFECTIVENESS | <p><b>Does the cost-effectiveness of the intervention favor the intervention or the comparison?</b></p> <ul style="list-style-type: none"> <li>○ Favors the comparison</li> <li>○ Probably favors the comparison</li> <li>● Does not favor either the intervention or the comparison</li> <li>○ Probably favors the intervention</li> <li>○ Favors the intervention</li> <br/> <li>○ Varies</li> <li>○ No included studies</li> </ul> | No research evidence was identified. |  |
| EQUITY             | <p><b>What would be the impact on health equity?</b></p> <ul style="list-style-type: none"> <li>○ Reduced</li> <li>○ Probably reduced</li> <li>● Probably no impact</li> <li>○ Probably increased</li> <li>○ Increased</li> <br/> <li>○ Varies</li> <li>○ Don't know</li> </ul>                                                                                                                                                       | No research evidence was identified. |  |

|               |                                                                                                                                                                                                                                                                                                                                                                   |                                                                                                                                                                                                                                                                                                                                                                                      |  |
|---------------|-------------------------------------------------------------------------------------------------------------------------------------------------------------------------------------------------------------------------------------------------------------------------------------------------------------------------------------------------------------------|--------------------------------------------------------------------------------------------------------------------------------------------------------------------------------------------------------------------------------------------------------------------------------------------------------------------------------------------------------------------------------------|--|
| ACCEPTABILITY | <p><b>Is the intervention acceptable to key stakeholders?</b></p> <ul style="list-style-type: none"> <li><input type="radio"/> No</li> <li><input type="radio"/> Probably no</li> <li><input checked="" type="radio"/> Probably yes</li> <li><input type="radio"/> Yes</li> <li><input type="radio"/> Varies</li> <li><input type="radio"/> Don't know</li> </ul> | No research evidence was identified.                                                                                                                                                                                                                                                                                                                                                 |  |
| FEASIBILITY   | <p><b>Is the intervention feasible to implement?</b></p> <ul style="list-style-type: none"> <li><input type="radio"/> No</li> <li><input type="radio"/> Probably no</li> <li><input checked="" type="radio"/> Probably yes</li> <li><input type="radio"/> Yes</li> <li><input type="radio"/> Varies</li> <li><input type="radio"/> Don't know</li> </ul>          | A study by Adjemian, et al in 2014 evaluated treatment of <i>M. abscessus</i> and MAC, looking at compliance with the 2007 ATS/IDSA guidelines. This study found poor adherence with only 13% of antibiotic regimens compliant with guidelines. Of prescribed regimens for MAC, only 44% contained a macrolide, while 36% of regimens for <i>M. abscessus</i> contained a macrolide. |  |

## Summary of judgments

|                              | JUDGEMENT                            |                                                      |                                                                 |                                         |                         |        |                     | IMPLICATIONS |
|------------------------------|--------------------------------------|------------------------------------------------------|-----------------------------------------------------------------|-----------------------------------------|-------------------------|--------|---------------------|--------------|
| <b>DESIRABLE EFFECTS</b>     | Trivial                              | <b>Small</b>                                         | Moderate                                                        | Large                                   |                         | Varies | Don't know          |              |
| <b>UNDESIRABLE EFFECTS</b>   | Large                                | Moderate                                             | <b>Small</b>                                                    | Trivial                                 |                         | Varies | Don't know          |              |
| <b>CERTAINTY OF EVIDENCE</b> | <b>Very low</b>                      | Low                                                  | Moderate                                                        | High                                    |                         |        | No included studies |              |
| <b>VALUES</b>                | Important uncertainty or variability | <b>Possibly important uncertainty or variability</b> | Probably no important uncertainty or variability                | No important uncertainty or variability |                         |        |                     |              |
| <b>BALANCE OF EFFECTS</b>    | Favors the comparison                | Probably favors the comparison                       | <b>Does not favor either the intervention or the comparison</b> | Probably favors the intervention        | Favors the intervention | Varies | Don't know          |              |
| <b>RESOURCES REQUIRED</b>    | Large costs                          | Moderate costs                                       | <b>Negligible costs and savings</b>                             | Moderate savings                        | Large savings           | Varies | Don't know          |              |
| <b>COST EFFECTIVENESS</b>    | Favors the comparison                | Probably favors the comparison                       | <b>Does not favor either the intervention or the comparison</b> | Probably favors the intervention        | Favors the intervention | Varies | No included studies |              |
| <b>EQUITY</b>                | Reduced                              | Probably reduced                                     | <b>Probably no impact</b>                                       | Probably increased                      | Increased               | Varies | Don't know          |              |
| <b>ACCEPTABILITY</b>         | No                                   | Probably no                                          | <b>Probably yes</b>                                             | Yes                                     |                         | Varies | Don't know          |              |
| <b>FEASIBILITY</b>           | No                                   | Probably no                                          | <b>Probably yes</b>                                             | Yes                                     |                         | Varies | Don't know          |              |

## Conclusions

**Should macrolide-susceptible MAC pulmonary disease be treated with a three-drug regimen with a macrolide or without a macrolide?**

| TYPE OF RECOMMENDATION               | Strong recommendation against the intervention                                                                                                                                                                                                                                                                                                                                                                                 | Conditional recommendation against the intervention | Conditional recommendation for either the intervention or the comparison | Conditional recommendation for the intervention | Strong recommendation for the intervention |
|--------------------------------------|--------------------------------------------------------------------------------------------------------------------------------------------------------------------------------------------------------------------------------------------------------------------------------------------------------------------------------------------------------------------------------------------------------------------------------|-----------------------------------------------------|--------------------------------------------------------------------------|-------------------------------------------------|--------------------------------------------|
|                                      | ○                                                                                                                                                                                                                                                                                                                                                                                                                              | ○                                                   | ○                                                                        | ○                                               | ●                                          |
| <b>RECOMMENDATION</b>                | <p>In patients with macrolide susceptible MAC pulmonary disease, we recommend a three-drug regimen that includes a macrolide over a three-drug regimen without a macrolide (strong recommendation, very low confidence in estimates of effect). (16 Agree, 0 Conditional, 2 Abstain)</p> <p>The panel members voted for a strong recommendation despite a very low confidence in estimates of effect.</p>                      |                                                     |                                                                          |                                                 |                                            |
| <b>JUSTIFICATION</b>                 | <p>Historical case series data have demonstrated that macrolide containing regimens are associated with higher culture conversion rates than nonmacrolide containing regimens.</p> <p>Macrolide susceptibility has been a consistent predictor of treatment success for pulmonary MAC, whereas susceptibility to other drugs has not been a predictor. This suggests that the macrolides have a key role in MAC treatment.</p> |                                                     |                                                                          |                                                 |                                            |
| <b>SUBGROUP CONSIDERATIONS</b>       |                                                                                                                                                                                                                                                                                                                                                                                                                                |                                                     |                                                                          |                                                 |                                            |
| <b>IMPLEMENTATION CONSIDERATIONS</b> |                                                                                                                                                                                                                                                                                                                                                                                                                                |                                                     |                                                                          |                                                 |                                            |
| <b>MONITORING AND EVALUATION</b>     | ECG monitoring may be relevant in patients using other drugs that can prolong the QTc interval                                                                                                                                                                                                                                                                                                                                 |                                                     |                                                                          |                                                 |                                            |



## Table E4.4. Question IV

In patients with newly diagnosed macrolide susceptible MAC pulmonary disease, should an azithromycin-based regimen or a clarithromycin-based regimen be used?

|                       |                                                                                                                                                                                        |
|-----------------------|----------------------------------------------------------------------------------------------------------------------------------------------------------------------------------------|
| <b>POPULATION:</b>    | patients with newly diagnosed pulmonary MAC                                                                                                                                            |
| <b>INTERVENTION:</b>  | azithromycin-based regimen                                                                                                                                                             |
| <b>COMPARISON:</b>    | clarithromycin-based regimen                                                                                                                                                           |
| <b>MAIN OUTCOMES:</b> | Death; Quality of life; Culture Conversion; Recurrence (relapse); Development of antibiotic resistance; Serious adverse effects; Withdrawal from study due to AEs; Any Adverse Effect; |

## Assessment

|                   | JUDGEMENT                                                                                                                                                                                                               | RESEARCH EVIDENCE                                                                                                         |                                        |                                      |                          |                              | ADDITIONAL CONSIDERATIONS                                                                                                                                                                                                                                    |
|-------------------|-------------------------------------------------------------------------------------------------------------------------------------------------------------------------------------------------------------------------|---------------------------------------------------------------------------------------------------------------------------|----------------------------------------|--------------------------------------|--------------------------|------------------------------|--------------------------------------------------------------------------------------------------------------------------------------------------------------------------------------------------------------------------------------------------------------|
| DESIRABLE EFFECTS | <b>How substantial are the desirable anticipated effects?</b> <ul style="list-style-type: none"> <li>○ Trivial</li> <li>○ Small</li> <li>● Moderate</li> <li>○ Large</li> <li>○ Varies</li> <li>○ Don't know</li> </ul> | <b>Azithromycin-based regimen compared to clarithromycin-based regimen in patients with newly diagnosed pulmonary MAC</b> |                                        |                                      |                          |                              | Azithromycin has fewer drug interactions compared with clarithromycin.<br><br>Azithromycin may be better tolerated than clarithromycin<br><br>Toxicity of azithromycin may be resolved by lowering dose, while this may not be possible with clarithromycin. |
|                   |                                                                                                                                                                                                                         | Outcomes                                                                                                                  | Anticipated absolute effects* (95% CI) |                                      | Relative effect (95% CI) | Nº of participants (studies) | Quality of the evidence (GRADE)                                                                                                                                                                                                                              |
|                   |                                                                                                                                                                                                                         |                                                                                                                           | Risk with clarithromycin-based regimen | Risk with azithromycin-based regimen |                          |                              |                                                                                                                                                                                                                                                              |
|                   |                                                                                                                                                                                                                         | Death - not reported                                                                                                      | -                                      | -                                    | -                        | -                            | -                                                                                                                                                                                                                                                            |
|                   |                                                                                                                                                                                                                         |                                                                                                                           |                                        |                                      |                          |                              |                                                                                                                                                                                                                                                              |

|                       |                                                                                                                                                      | Quality of life - not measured                                                                                                                                                                                                                                                                 | -                   | -                                 | -                                             | -                                | Clarithromycin may have more QT-interval prolongation. |                                                                                                                                                              |         |                     |                                   |       |          |   |                 |          |   |                    |          |      |
|-----------------------|------------------------------------------------------------------------------------------------------------------------------------------------------|------------------------------------------------------------------------------------------------------------------------------------------------------------------------------------------------------------------------------------------------------------------------------------------------|---------------------|-----------------------------------|-----------------------------------------------|----------------------------------|--------------------------------------------------------|--------------------------------------------------------------------------------------------------------------------------------------------------------------|---------|---------------------|-----------------------------------|-------|----------|---|-----------------|----------|---|--------------------|----------|------|
| UNDESIRABLE EFFECTS   | <b>How substantial are the undesirable anticipated effects?</b><br><br>○ Large<br>○ Moderate<br>○ Small<br>● Trivial<br><br>○ Varies<br>○ Don't know | Culture Conversion                                                                                                                                                                                                                                                                             | 82 per 100          | <b>72 per 100</b><br>(60 to 86)   | <b>RR 0.88</b><br>(0.73 to 1.05)              | 368<br>(4 observational studies) | ⊕○○○<br>VERY LOW <sup>1,2</sup>                        | In panel members observation clarithromycin may have lower ototoxicity than azithromycin. However, there was no consensus and more studies would be helpful. |         |                     |                                   |       |          |   |                 |          |   |                    |          |      |
|                       |                                                                                                                                                      | Recurrence (relapse) - not measured                                                                                                                                                                                                                                                            | -                   | -                                 | -                                             | -                                | -                                                      |                                                                                                                                                              |         |                     |                                   |       |          |   |                 |          |   |                    |          |      |
|                       |                                                                                                                                                      | Development of antibiotic resistance                                                                                                                                                                                                                                                           | 9 per 100           | <b>5 per 100</b><br>(1 to 26)     | <b>RR 0.51</b><br>(0.07 to 2.79) <sup>4</sup> | 189<br>(3 observational studies) | ⊕○○○<br>VERY LOW <sup>1,3</sup>                        |                                                                                                                                                              |         |                     |                                   |       |          |   |                 |          |   |                    |          |      |
|                       |                                                                                                                                                      | Serious adverse effects                                                                                                                                                                                                                                                                        | 0 per 100           | <b>0 per 100</b><br>(0 to 0)      | not estimable                                 | 59<br>(1 observational study)    | ⊕○○○<br>VERY LOW <sup>1,5</sup>                        |                                                                                                                                                              |         |                     |                                   |       |          |   |                 |          |   |                    |          |      |
|                       |                                                                                                                                                      | Withdrawal from study due to AEs                                                                                                                                                                                                                                                               | 14 per 100          | <b>15 per 100</b><br>(6 to 30)    | <b>RR 1.02</b><br>(0.45 to 2.07)              | 191<br>(3 observational studies) | ⊕○○○<br>VERY LOW <sup>1,6</sup>                        |                                                                                                                                                              |         |                     |                                   |       |          |   |                 |          |   |                    |          |      |
|                       |                                                                                                                                                      | Any Adverse Effect                                                                                                                                                                                                                                                                             | 41 per 100          | <b>31 per 100</b><br>(18 to 52)   | <b>RR 0.75</b><br>(0.44 to 1.28)              | 483<br>(6 observational studies) | ⊕○○○<br>VERY LOW <sup>1,7,8</sup>                      |                                                                                                                                                              |         |                     |                                   |       |          |   |                 |          |   |                    |          |      |
|                       |                                                                                                                                                      |                                                                                                                                                                                                                                                                                                |                     |                                   |                                               |                                  |                                                        |                                                                                                                                                              |         |                     |                                   |       |          |   |                 |          |   |                    |          |      |
| CERTAINTY OF EVIDENCE | <b>What is the overall certainty of the evidence of effects?</b><br><br>● Very low<br>○ Low<br>○ Moderate<br>○ High<br><br>○ No included studies     | <b>The relative importance or values of the main outcomes of interest:</b>                                                                                                                                                                                                                     |                     |                                   |                                               |                                  |                                                        |                                                                                                                                                              |         |                     |                                   |       |          |   |                 |          |   |                    |          |      |
|                       |                                                                                                                                                      | <table><tr><th>Outcome</th><th>Relative importance</th><th>Certainty of the evidence (GRADE)</th></tr><tr><td>Death</td><td>CRITICAL</td><td>-</td></tr><tr><td>Quality of life</td><td>CRITICAL</td><td>-</td></tr><tr><td>Culture Conversion</td><td>CRITICAL</td><td>⊕○○○</td></tr></table> |                     |                                   |                                               |                                  |                                                        |                                                                                                                                                              | Outcome | Relative importance | Certainty of the evidence (GRADE) | Death | CRITICAL | - | Quality of life | CRITICAL | - | Culture Conversion | CRITICAL | ⊕○○○ |
|                       |                                                                                                                                                      | Outcome                                                                                                                                                                                                                                                                                        | Relative importance | Certainty of the evidence (GRADE) |                                               |                                  |                                                        |                                                                                                                                                              |         |                     |                                   |       |          |   |                 |          |   |                    |          |      |
|                       |                                                                                                                                                      | Death                                                                                                                                                                                                                                                                                          | CRITICAL            | -                                 |                                               |                                  |                                                        |                                                                                                                                                              |         |                     |                                   |       |          |   |                 |          |   |                    |          |      |
|                       |                                                                                                                                                      | Quality of life                                                                                                                                                                                                                                                                                | CRITICAL            | -                                 |                                               |                                  |                                                        |                                                                                                                                                              |         |                     |                                   |       |          |   |                 |          |   |                    |          |      |
| Culture Conversion    | CRITICAL                                                                                                                                             | ⊕○○○                                                                                                                                                                                                                                                                                           |                     |                                   |                                               |                                  |                                                        |                                                                                                                                                              |         |                     |                                   |       |          |   |                 |          |   |                    |          |      |
|                       |                                                                                                                                                      |                                                                                                                                                                                                                                                                                                |                     |                                   |                                               |                                  |                                                        |                                                                                                                                                              |         |                     |                                   |       |          |   |                 |          |   |                    |          |      |
|                       |                                                                                                                                                      |                                                                                                                                                                                                                                                                                                |                     |                                   |                                               |                                  |                                                        |                                                                                                                                                              |         |                     |                                   |       |          |   |                 |          |   |                    |          |      |
|                       |                                                                                                                                                      |                                                                                                                                                                                                                                                                                                |                     |                                   |                                               |                                  |                                                        |                                                                                                                                                              |         |                     |                                   |       |          |   |                 |          |   |                    |          |      |

|        |                                                                                                                                                                                                                                                                                                                                                                                |                                                                                                                                                                                                                                                                                                                                                                                                                                                                                                                                                                                                                                                                                                           |          |                  |                                                                                                                                                                                                                                                                                                    |
|--------|--------------------------------------------------------------------------------------------------------------------------------------------------------------------------------------------------------------------------------------------------------------------------------------------------------------------------------------------------------------------------------|-----------------------------------------------------------------------------------------------------------------------------------------------------------------------------------------------------------------------------------------------------------------------------------------------------------------------------------------------------------------------------------------------------------------------------------------------------------------------------------------------------------------------------------------------------------------------------------------------------------------------------------------------------------------------------------------------------------|----------|------------------|----------------------------------------------------------------------------------------------------------------------------------------------------------------------------------------------------------------------------------------------------------------------------------------------------|
|        |                                                                                                                                                                                                                                                                                                                                                                                |                                                                                                                                                                                                                                                                                                                                                                                                                                                                                                                                                                                                                                                                                                           |          | VERY LOW         |                                                                                                                                                                                                                                                                                                    |
|        |                                                                                                                                                                                                                                                                                                                                                                                | Recurrence (relapse)                                                                                                                                                                                                                                                                                                                                                                                                                                                                                                                                                                                                                                                                                      | CRITICAL | -                |                                                                                                                                                                                                                                                                                                    |
|        |                                                                                                                                                                                                                                                                                                                                                                                | Development of antibiotic resistance                                                                                                                                                                                                                                                                                                                                                                                                                                                                                                                                                                                                                                                                      | CRITICAL | ⊕○○○<br>VERY LOW |                                                                                                                                                                                                                                                                                                    |
|        |                                                                                                                                                                                                                                                                                                                                                                                | Serious adverse effects                                                                                                                                                                                                                                                                                                                                                                                                                                                                                                                                                                                                                                                                                   | CRITICAL | ⊕○○○<br>VERY LOW |                                                                                                                                                                                                                                                                                                    |
|        |                                                                                                                                                                                                                                                                                                                                                                                | Withdrawal from study due to AEs                                                                                                                                                                                                                                                                                                                                                                                                                                                                                                                                                                                                                                                                          | CRITICAL | ⊕○○○<br>VERY LOW |                                                                                                                                                                                                                                                                                                    |
|        |                                                                                                                                                                                                                                                                                                                                                                                | Any Adverse Effect                                                                                                                                                                                                                                                                                                                                                                                                                                                                                                                                                                                                                                                                                        | CRITICAL | ⊕○○○<br>VERY LOW |                                                                                                                                                                                                                                                                                                    |
|        |                                                                                                                                                                                                                                                                                                                                                                                |                                                                                                                                                                                                                                                                                                                                                                                                                                                                                                                                                                                                                                                                                                           |          |                  |                                                                                                                                                                                                                                                                                                    |
| VALUES | <p><b>Is there important uncertainty about or variability in how much people value the main outcomes?</b></p> <ul style="list-style-type: none"> <li>○ Important uncertainty or variability</li> <li>○ Possibly important uncertainty or variability</li> <li>● Probably no important uncertainty or variability</li> <li>○ No important uncertainty or variability</li> </ul> | <p>We identified 1 study including 51 mainly middle-aged to older women in Canada (mean age 67y, MAC and M. abscessus) that measured QoL (Mehta and Marras. Respiratory Medicine 2011,105:1718-1725).</p> <p>Mean SF-36 scores (scale 0-100, higher scores indicate better QoL; MID~5-10 points) were consistently much lower compared to population normal:</p> <p>Physical Functioning (58 vs. 86; Δ28)</p> <p>Role Physical (54 vs. 82; Δ28)</p> <p>Bodily Pain (63 vs. 76; Δ13)</p> <p>General Health Perceptions (41 vs. 77; Δ36)</p> <p>Energy/Vitality (49 vs. 66; Δ17)</p> <p>Social Functioning (63 vs. 86; Δ23)</p> <p>Role Emotional (75 vs. 84; Δ10)</p> <p>Mental Health (69 vs. 76; Δ9)</p> |          |                  | <p>Number of pills per day is smaller with azithromycin which may increase adherence and be better accepted by patients. Based on patient observations and panel member experience clarithromycin has a metallic taste and more frequently causes nausea, which make it less preferred option.</p> |

|                                                                                                                                                                                                                                                                                                                                                                                                                                                                   | <p>Mean SGRQ scores (scale 0-100, lower scores indicate better QoL; MID ~4-5 points based on COPD population) were lower compared to population normal consistently across all domains. Mean difference in total SGRQ in NTM patients compared to normal population was 31 points lower (39 vs. 8 points lower).</p> <p>We found no other study in the population of interest that would evaluate patient attitudes towards other outcomes or treatments of interest.</p>                                                                                                                                                                                                                                                                                                                                                                                                                                                                                                                                                                                                                                                                                                                                                                                                                                                                                        |                                                                                                                    |                                               |                                  |                                 |  |  |          |                                        |  |                          |                              |                                 |                                        |                                      |                      |   |   |   |   |   |                                |   |   |   |   |   |                                                    |            |                                 |                                  |                                  |                         |                                     |   |   |   |   |   |                                                                      |           |                               |                                               |                                  |                         |  |
|-------------------------------------------------------------------------------------------------------------------------------------------------------------------------------------------------------------------------------------------------------------------------------------------------------------------------------------------------------------------------------------------------------------------------------------------------------------------|------------------------------------------------------------------------------------------------------------------------------------------------------------------------------------------------------------------------------------------------------------------------------------------------------------------------------------------------------------------------------------------------------------------------------------------------------------------------------------------------------------------------------------------------------------------------------------------------------------------------------------------------------------------------------------------------------------------------------------------------------------------------------------------------------------------------------------------------------------------------------------------------------------------------------------------------------------------------------------------------------------------------------------------------------------------------------------------------------------------------------------------------------------------------------------------------------------------------------------------------------------------------------------------------------------------------------------------------------------------|--------------------------------------------------------------------------------------------------------------------|-----------------------------------------------|----------------------------------|---------------------------------|--|--|----------|----------------------------------------|--|--------------------------|------------------------------|---------------------------------|----------------------------------------|--------------------------------------|----------------------|---|---|---|---|---|--------------------------------|---|---|---|---|---|----------------------------------------------------|------------|---------------------------------|----------------------------------|----------------------------------|-------------------------|-------------------------------------|---|---|---|---|---|----------------------------------------------------------------------|-----------|-------------------------------|-----------------------------------------------|----------------------------------|-------------------------|--|
| <div>BALANCE OF EFFECTS</div> <div><p><b>Does the balance between desirable and undesirable effects favor the intervention or the comparison?</b></p><ul style="list-style-type: none"><li>○ Favors the comparison</li><li>○ Probably favors the comparison</li><li>○ Does not favor either the intervention or the comparison</li><li>● Probably favors the intervention</li><li>○ Favors the intervention</li><li>○ Varies</li><li>○ Don't know</li></ul></div> | <table><tr><th colspan="6">Azithromycin-based regimen compared to clarithromycin-based regimen in patients with newly diagnosed pulmonary MAC</th></tr><tr><th rowspan="2">Outcomes</th><th colspan="2">Anticipated absolute effects* (95% CI)</th><th rowspan="2">Relative effect (95% CI)</th><th rowspan="2">Nº of participants (studies)</th><th rowspan="2">Quality of the evidence (GRADE)</th></tr><tr><th>Risk with clarithromycin-based regimen</th><th>Risk with azithromycin-based regimen</th></tr><tr><td>Death - not reported</td><td>-</td><td>-</td><td>-</td><td>-</td><td>-</td></tr><tr><td>Quality of life - not measured</td><td>-</td><td>-</td><td>-</td><td>-</td><td>-</td></tr><tr><td>Culture Conversion follow up: range 4 to 12 months</td><td>82 per 100</td><td><b>72 per 100</b><br/>(60 to 86)</td><td><b>RR 0.88</b><br/>(0.73 to 1.05)</td><td>368<br/>(4 observational studies)</td><td>⊕○○○<br/>VERY LOW<br/>1,2</td></tr><tr><td>Recurrence (relapse) - not measured</td><td>-</td><td>-</td><td>-</td><td>-</td><td>-</td></tr><tr><td>Development of antibiotic resistance follow up: range 4 to 12 months</td><td>9 per 100</td><td><b>5 per 100</b><br/>(1 to 26)</td><td><b>RR 0.51</b><br/>(0.07 to 2.79) <sup>4</sup></td><td>189<br/>(3 observational studies)</td><td>⊕○○○<br/>VERY LOW<br/>1,3</td></tr></table> | Azithromycin-based regimen compared to clarithromycin-based regimen in patients with newly diagnosed pulmonary MAC |                                               |                                  |                                 |  |  | Outcomes | Anticipated absolute effects* (95% CI) |  | Relative effect (95% CI) | Nº of participants (studies) | Quality of the evidence (GRADE) | Risk with clarithromycin-based regimen | Risk with azithromycin-based regimen | Death - not reported | - | - | - | - | - | Quality of life - not measured | - | - | - | - | - | Culture Conversion follow up: range 4 to 12 months | 82 per 100 | <b>72 per 100</b><br>(60 to 86) | <b>RR 0.88</b><br>(0.73 to 1.05) | 368<br>(4 observational studies) | ⊕○○○<br>VERY LOW<br>1,2 | Recurrence (relapse) - not measured | - | - | - | - | - | Development of antibiotic resistance follow up: range 4 to 12 months | 9 per 100 | <b>5 per 100</b><br>(1 to 26) | <b>RR 0.51</b><br>(0.07 to 2.79) <sup>4</sup> | 189<br>(3 observational studies) | ⊕○○○<br>VERY LOW<br>1,3 |  |
| Azithromycin-based regimen compared to clarithromycin-based regimen in patients with newly diagnosed pulmonary MAC                                                                                                                                                                                                                                                                                                                                                |                                                                                                                                                                                                                                                                                                                                                                                                                                                                                                                                                                                                                                                                                                                                                                                                                                                                                                                                                                                                                                                                                                                                                                                                                                                                                                                                                                  |                                                                                                                    |                                               |                                  |                                 |  |  |          |                                        |  |                          |                              |                                 |                                        |                                      |                      |   |   |   |   |   |                                |   |   |   |   |   |                                                    |            |                                 |                                  |                                  |                         |                                     |   |   |   |   |   |                                                                      |           |                               |                                               |                                  |                         |  |
| Outcomes                                                                                                                                                                                                                                                                                                                                                                                                                                                          | Anticipated absolute effects* (95% CI)                                                                                                                                                                                                                                                                                                                                                                                                                                                                                                                                                                                                                                                                                                                                                                                                                                                                                                                                                                                                                                                                                                                                                                                                                                                                                                                           |                                                                                                                    | Relative effect (95% CI)                      | Nº of participants (studies)     | Quality of the evidence (GRADE) |  |  |          |                                        |  |                          |                              |                                 |                                        |                                      |                      |   |   |   |   |   |                                |   |   |   |   |   |                                                    |            |                                 |                                  |                                  |                         |                                     |   |   |   |   |   |                                                                      |           |                               |                                               |                                  |                         |  |
|                                                                                                                                                                                                                                                                                                                                                                                                                                                                   | Risk with clarithromycin-based regimen                                                                                                                                                                                                                                                                                                                                                                                                                                                                                                                                                                                                                                                                                                                                                                                                                                                                                                                                                                                                                                                                                                                                                                                                                                                                                                                           | Risk with azithromycin-based regimen                                                                               |                                               |                                  |                                 |  |  |          |                                        |  |                          |                              |                                 |                                        |                                      |                      |   |   |   |   |   |                                |   |   |   |   |   |                                                    |            |                                 |                                  |                                  |                         |                                     |   |   |   |   |   |                                                                      |           |                               |                                               |                                  |                         |  |
| Death - not reported                                                                                                                                                                                                                                                                                                                                                                                                                                              | -                                                                                                                                                                                                                                                                                                                                                                                                                                                                                                                                                                                                                                                                                                                                                                                                                                                                                                                                                                                                                                                                                                                                                                                                                                                                                                                                                                | -                                                                                                                  | -                                             | -                                | -                               |  |  |          |                                        |  |                          |                              |                                 |                                        |                                      |                      |   |   |   |   |   |                                |   |   |   |   |   |                                                    |            |                                 |                                  |                                  |                         |                                     |   |   |   |   |   |                                                                      |           |                               |                                               |                                  |                         |  |
| Quality of life - not measured                                                                                                                                                                                                                                                                                                                                                                                                                                    | -                                                                                                                                                                                                                                                                                                                                                                                                                                                                                                                                                                                                                                                                                                                                                                                                                                                                                                                                                                                                                                                                                                                                                                                                                                                                                                                                                                | -                                                                                                                  | -                                             | -                                | -                               |  |  |          |                                        |  |                          |                              |                                 |                                        |                                      |                      |   |   |   |   |   |                                |   |   |   |   |   |                                                    |            |                                 |                                  |                                  |                         |                                     |   |   |   |   |   |                                                                      |           |                               |                                               |                                  |                         |  |
| Culture Conversion follow up: range 4 to 12 months                                                                                                                                                                                                                                                                                                                                                                                                                | 82 per 100                                                                                                                                                                                                                                                                                                                                                                                                                                                                                                                                                                                                                                                                                                                                                                                                                                                                                                                                                                                                                                                                                                                                                                                                                                                                                                                                                       | <b>72 per 100</b><br>(60 to 86)                                                                                    | <b>RR 0.88</b><br>(0.73 to 1.05)              | 368<br>(4 observational studies) | ⊕○○○<br>VERY LOW<br>1,2         |  |  |          |                                        |  |                          |                              |                                 |                                        |                                      |                      |   |   |   |   |   |                                |   |   |   |   |   |                                                    |            |                                 |                                  |                                  |                         |                                     |   |   |   |   |   |                                                                      |           |                               |                                               |                                  |                         |  |
| Recurrence (relapse) - not measured                                                                                                                                                                                                                                                                                                                                                                                                                               | -                                                                                                                                                                                                                                                                                                                                                                                                                                                                                                                                                                                                                                                                                                                                                                                                                                                                                                                                                                                                                                                                                                                                                                                                                                                                                                                                                                | -                                                                                                                  | -                                             | -                                | -                               |  |  |          |                                        |  |                          |                              |                                 |                                        |                                      |                      |   |   |   |   |   |                                |   |   |   |   |   |                                                    |            |                                 |                                  |                                  |                         |                                     |   |   |   |   |   |                                                                      |           |                               |                                               |                                  |                         |  |
| Development of antibiotic resistance follow up: range 4 to 12 months                                                                                                                                                                                                                                                                                                                                                                                              | 9 per 100                                                                                                                                                                                                                                                                                                                                                                                                                                                                                                                                                                                                                                                                                                                                                                                                                                                                                                                                                                                                                                                                                                                                                                                                                                                                                                                                                        | <b>5 per 100</b><br>(1 to 26)                                                                                      | <b>RR 0.51</b><br>(0.07 to 2.79) <sup>4</sup> | 189<br>(3 observational studies) | ⊕○○○<br>VERY LOW<br>1,3         |  |  |          |                                        |  |                          |                              |                                 |                                        |                                      |                      |   |   |   |   |   |                                |   |   |   |   |   |                                                    |            |                                 |                                  |                                  |                         |                                     |   |   |   |   |   |                                                                      |           |                               |                                               |                                  |                         |  |

|                                                                 |                                                                                                                                                                                                                                                                                                                                                                                                                         |                                                                                                                                                                                                                                                                                                                                                                                                                                                                                                                                                                                                                                                                                                                                                               |                                                                                                                                                                                                                                                                                                                |                                  |                              |               |                               |                         |                                                                 |            |                                |                                  |                                  |                         |                                                    |            |                                 |                                  |                                  |                           |  |
|-----------------------------------------------------------------|-------------------------------------------------------------------------------------------------------------------------------------------------------------------------------------------------------------------------------------------------------------------------------------------------------------------------------------------------------------------------------------------------------------------------|---------------------------------------------------------------------------------------------------------------------------------------------------------------------------------------------------------------------------------------------------------------------------------------------------------------------------------------------------------------------------------------------------------------------------------------------------------------------------------------------------------------------------------------------------------------------------------------------------------------------------------------------------------------------------------------------------------------------------------------------------------------|----------------------------------------------------------------------------------------------------------------------------------------------------------------------------------------------------------------------------------------------------------------------------------------------------------------|----------------------------------|------------------------------|---------------|-------------------------------|-------------------------|-----------------------------------------------------------------|------------|--------------------------------|----------------------------------|----------------------------------|-------------------------|----------------------------------------------------|------------|---------------------------------|----------------------------------|----------------------------------|---------------------------|--|
|                                                                 |                                                                                                                                                                                                                                                                                                                                                                                                                         | <table><tr><td>Serious adverse effects follow up: 4 months</td><td>0 per 100</td><td><b>0 per 100</b><br/>(0 to 0)</td><td>not estimable</td><td>59<br/>(1 observational study)</td><td>⊕○○○<br/>VERY LOW<br/>1,5</td></tr><tr><td>Withdrawal from study due to AEs follow up: range 4 to 6 months</td><td>14 per 100</td><td><b>15 per 100</b><br/>(6 to 30)</td><td><b>RR 1.02</b><br/>(0.45 to 2.07)</td><td>191<br/>(3 observational studies)</td><td>⊕○○○<br/>VERY LOW<br/>1,6</td></tr><tr><td>Any Adverse Effect follow up: range 4 to 12 months</td><td>41 per 100</td><td><b>31 per 100</b><br/>(18 to 52)</td><td><b>RR 0.75</b><br/>(0.44 to 1.28)</td><td>483<br/>(6 observational studies)</td><td>⊕○○○<br/>VERY LOW<br/>1,7,8</td></tr></table> | Serious adverse effects follow up: 4 months                                                                                                                                                                                                                                                                    | 0 per 100                        | <b>0 per 100</b><br>(0 to 0) | not estimable | 59<br>(1 observational study) | ⊕○○○<br>VERY LOW<br>1,5 | Withdrawal from study due to AEs follow up: range 4 to 6 months | 14 per 100 | <b>15 per 100</b><br>(6 to 30) | <b>RR 1.02</b><br>(0.45 to 2.07) | 191<br>(3 observational studies) | ⊕○○○<br>VERY LOW<br>1,6 | Any Adverse Effect follow up: range 4 to 12 months | 41 per 100 | <b>31 per 100</b><br>(18 to 52) | <b>RR 0.75</b><br>(0.44 to 1.28) | 483<br>(6 observational studies) | ⊕○○○<br>VERY LOW<br>1,7,8 |  |
| Serious adverse effects follow up: 4 months                     | 0 per 100                                                                                                                                                                                                                                                                                                                                                                                                               | <b>0 per 100</b><br>(0 to 0)                                                                                                                                                                                                                                                                                                                                                                                                                                                                                                                                                                                                                                                                                                                                  | not estimable                                                                                                                                                                                                                                                                                                  | 59<br>(1 observational study)    | ⊕○○○<br>VERY LOW<br>1,5      |               |                               |                         |                                                                 |            |                                |                                  |                                  |                         |                                                    |            |                                 |                                  |                                  |                           |  |
| Withdrawal from study due to AEs follow up: range 4 to 6 months | 14 per 100                                                                                                                                                                                                                                                                                                                                                                                                              | <b>15 per 100</b><br>(6 to 30)                                                                                                                                                                                                                                                                                                                                                                                                                                                                                                                                                                                                                                                                                                                                | <b>RR 1.02</b><br>(0.45 to 2.07)                                                                                                                                                                                                                                                                               | 191<br>(3 observational studies) | ⊕○○○<br>VERY LOW<br>1,6      |               |                               |                         |                                                                 |            |                                |                                  |                                  |                         |                                                    |            |                                 |                                  |                                  |                           |  |
| Any Adverse Effect follow up: range 4 to 12 months              | 41 per 100                                                                                                                                                                                                                                                                                                                                                                                                              | <b>31 per 100</b><br>(18 to 52)                                                                                                                                                                                                                                                                                                                                                                                                                                                                                                                                                                                                                                                                                                                               | <b>RR 0.75</b><br>(0.44 to 1.28)                                                                                                                                                                                                                                                                               | 483<br>(6 observational studies) | ⊕○○○<br>VERY LOW<br>1,7,8    |               |                               |                         |                                                                 |            |                                |                                  |                                  |                         |                                                    |            |                                 |                                  |                                  |                           |  |
| RESOURCES REQUIRED                                              | <p><b>How large are the resource requirements (costs)?</b></p> <ul style="list-style-type: none"><li>○ Large costs</li><li>○ Moderate costs</li><li>○ Negligible costs and savings</li><li>○ Moderate savings</li><li>○ Large savings</li><li>● Varies</li><li>○ Don't know</li></ul>                                                                                                                                   | No research evidence was identified.                                                                                                                                                                                                                                                                                                                                                                                                                                                                                                                                                                                                                                                                                                                          | In the experience of panel members there is large variability in the cost of azithromycin and clarithromycin. Cost should be considered on an individual patient level. However, panel members thought it would be unlikely that cost difference would influence general recommendation favoring azithromycin. |                                  |                              |               |                               |                         |                                                                 |            |                                |                                  |                                  |                         |                                                    |            |                                 |                                  |                                  |                           |  |
| COST EFFECTIVENESS                                              | <p><b>Does the cost-effectiveness of the intervention favor the intervention or the comparison?</b></p> <ul style="list-style-type: none"><li>○ Favors the comparison</li><li>○ Probably favors the comparison</li><li>○ Does not favor either the intervention or the comparison</li><li>○ Probably favors the intervention</li><li>○ Favors the intervention</li><li>○ Varies</li><li>○ No included studies</li></ul> | No research evidence was identified.                                                                                                                                                                                                                                                                                                                                                                                                                                                                                                                                                                                                                                                                                                                          |                                                                                                                                                                                                                                                                                                                |                                  |                              |               |                               |                         |                                                                 |            |                                |                                  |                                  |                         |                                                    |            |                                 |                                  |                                  |                           |  |
| EQUITY                                                          | <p><b>What would be the impact on</b></p>                                                                                                                                                                                                                                                                                                                                                                               | No research evidence was identified.                                                                                                                                                                                                                                                                                                                                                                                                                                                                                                                                                                                                                                                                                                                          |                                                                                                                                                                                                                                                                                                                |                                  |                              |               |                               |                         |                                                                 |            |                                |                                  |                                  |                         |                                                    |            |                                 |                                  |                                  |                           |  |

|               |                                                                                                                                                                                                                                        |                                      |                                                                                                                                                     |
|---------------|----------------------------------------------------------------------------------------------------------------------------------------------------------------------------------------------------------------------------------------|--------------------------------------|-----------------------------------------------------------------------------------------------------------------------------------------------------|
|               | <b>health equity?</b> <ul style="list-style-type: none"> <li>○ Reduced</li> <li>○ Probably reduced</li> <li>● Probably no impact</li> <li>○ Probably increased</li> <li>○ Increased</li> <li>○ Varies</li> <li>○ Don't know</li> </ul> |                                      |                                                                                                                                                     |
| ACCEPTABILITY | <b>Is the intervention acceptable to key stakeholders?</b> <ul style="list-style-type: none"> <li>○ No</li> <li>○ Probably no</li> <li>○ Probably yes</li> <li>● Yes</li> <li>○ Varies</li> <li>○ Don't know</li> </ul>                | No research evidence was identified. |                                                                                                                                                     |
| FEASIBILITY   | <b>Is the intervention feasible to implement?</b> <ul style="list-style-type: none"> <li>● No</li> <li>○ Probably no</li> <li>○ Probably yes</li> <li>○ Yes</li> <li>○ Varies</li> <li>○ Don't know</li> </ul>                         | No research evidence was identified. | Panel members could not think of any barriers to implementation, other than cost of the drug in jurisdictions where azithromycin is more expensive. |

## Summary of judgments

|                              | JUDGEMENT                            |                                               |                                                          |                                         |                         |               |                     | IMPLICATIONS |
|------------------------------|--------------------------------------|-----------------------------------------------|----------------------------------------------------------|-----------------------------------------|-------------------------|---------------|---------------------|--------------|
| <b>DESIRABLE EFFECTS</b>     | Trivial                              | Small                                         | <b>Moderate</b>                                          | Large                                   |                         | Varies        | Don't know          |              |
| <b>UNDESIRABLE EFFECTS</b>   | Large                                | Moderate                                      | Small                                                    | <b>Trivial</b>                          |                         | Varies        | Don't know          |              |
| <b>CERTAINTY OF EVIDENCE</b> | <b>Very low</b>                      | Low                                           | Moderate                                                 | High                                    |                         |               | No included studies |              |
| <b>VALUES</b>                | Important uncertainty or variability | Possibly important uncertainty or variability | <b>Probably no important uncertainty or variability</b>  | No important uncertainty or variability |                         |               |                     |              |
| <b>BALANCE OF EFFECTS</b>    | Favors the comparison                | Probably favors the comparison                | Does not favor either the intervention or the comparison | <b>Probably favors the intervention</b> | Favors the intervention | Varies        | Don't know          |              |
| <b>RESOURCES REQUIRED</b>    | Large costs                          | Moderate costs                                | Negligible costs and savings                             | Moderate savings                        | Large savings           | <b>Varies</b> | Don't know          |              |
| <b>COST EFFECTIVENESS</b>    | Favors the comparison                | Probably favors the comparison                | Does not favor either the intervention or the comparison | Probably favors the intervention        | Favors the intervention | Varies        | No included studies |              |

|                      | JUDGEMENT |                  |                           |                    |           |        |            | IMPLICATIONS |
|----------------------|-----------|------------------|---------------------------|--------------------|-----------|--------|------------|--------------|
| <b>EQUITY</b>        | Reduced   | Probably reduced | <b>Probably no impact</b> | Probably increased | Increased | Varies | Don't know |              |
| <b>ACCEPTABILITY</b> | No        | Probably no      | Probably yes              | <b>Yes</b>         |           | Varies | Don't know |              |
| <b>FEASIBILITY</b>   | <b>No</b> | Probably no      | Probably yes              | Yes                |           | Varies | Don't know |              |

## Conclusions

**In patients with newly diagnosed macrolide susceptible MAC pulmonary disease, should an azithromycin-based regimen or a clarithromycin-based regimen be used?**

|                                      |                                                                                                                                                                                                                                                                                                                                             |                                                              |                                                                                   |                                                          |                                                     |
|--------------------------------------|---------------------------------------------------------------------------------------------------------------------------------------------------------------------------------------------------------------------------------------------------------------------------------------------------------------------------------------------|--------------------------------------------------------------|-----------------------------------------------------------------------------------|----------------------------------------------------------|-----------------------------------------------------|
| <b>TYPE OF RECOMMENDATION</b>        | Strong recommendation against the intervention<br><br>○                                                                                                                                                                                                                                                                                     | Conditional recommendation against the intervention<br><br>○ | Conditional recommendation for either the intervention or the comparison<br><br>○ | Conditional recommendation for the intervention<br><br>● | Strong recommendation for the intervention<br><br>○ |
| <b>RECOMMENDATION</b>                | <p>In patients with macrolide-susceptible MAC pulmonary disease we suggest azithromycin-based treatment regimens rather than clarithromycin-based regimens. (conditional recommendation, very low confidence in estimates of effect).</p> <p>The panel members voted unanimously for a conditional recommendation for the intervention.</p> |                                                              |                                                                                   |                                                          |                                                     |
| <b>JUSTIFICATION</b>                 |                                                                                                                                                                                                                                                                                                                                             |                                                              |                                                                                   |                                                          |                                                     |
| <b>SUBGROUP CONSIDERATIONS</b>       |                                                                                                                                                                                                                                                                                                                                             |                                                              |                                                                                   |                                                          |                                                     |
| <b>IMPLEMENTATION CONSIDERATIONS</b> |                                                                                                                                                                                                                                                                                                                                             |                                                              |                                                                                   |                                                          |                                                     |



|                                  |                                                                                                                                                                                                                                                                                                                                                                                                                                              |
|----------------------------------|----------------------------------------------------------------------------------------------------------------------------------------------------------------------------------------------------------------------------------------------------------------------------------------------------------------------------------------------------------------------------------------------------------------------------------------------|
| <b>MONITORING AND EVALUATION</b> | <p>Because of potential for ototoxicity patients should be regularly asked about hearing loss or tinnitus. Some panel members perform baseline audiogram and then repeat based on symptoms or yearly.</p> <p>Because of potential for QTc prolongation some experts perform baseline EKG in patients starting macrolides, especially those receiving drug regimens that include other QTc prolonging drugs and then repeat periodically.</p> |
| <b>RESEARCH PRIORITIES</b>       | <p>Estimate the risk of QTc prolongation, hearing loss in patients receiving azithromycin vs clarithromycin.</p> <p>Randomized trials with therapy adjusted based on monitoring drug levels to see if this prevents toxicity.</p>                                                                                                                                                                                                            |

## Table E4.5. Question V

**Should patients with macrolide susceptible MAC pulmonary disease be treated with a parenteral amikacin or streptomycin-containing regimen or without a parenteral amikacin or streptomycin-containing regimen?**

|                       |                                                                                                                                                                    |
|-----------------------|--------------------------------------------------------------------------------------------------------------------------------------------------------------------|
| <b>POPULATION:</b>    | MAC pulmonary infection                                                                                                                                            |
| <b>INTERVENTION:</b>  | a treatment regimen with a parenteral agent                                                                                                                        |
| <b>COMPARISON:</b>    | a treatment regimen without a parenteral agent                                                                                                                     |
| <b>MAIN OUTCOMES:</b> | Cure of NTM; Death; Recurrence (relapse); Culture Conversion; Any adverse reaction; Serious adverse events; Quality of life; Development of antibiotic resistance; |

## Assessment

|                   | JUDGEMENT                                                                                                                                                                              | RESEARCH EVIDENCE                                                            | ADDITIONAL CONSIDERATIONS |
|-------------------|----------------------------------------------------------------------------------------------------------------------------------------------------------------------------------------|------------------------------------------------------------------------------|---------------------------|
| DESIRABLE EFFECTS | <p><b>How substantial are the desirable anticipated effects?</b></p> <ul style="list-style-type: none"> <li>○ Trivial</li> <li>● Small</li> <li>○ Moderate</li> <li>○ Large</li> </ul> | <hr/> <p><b>Parenteral compared to no parenteral agent for MAC</b></p> <hr/> |                           |

|                                                     | <ul style="list-style-type: none"><li>○ Varies</li><li>○ Don't know</li></ul>                                                                                                                                             | <table><tr><th rowspan="2">Outcomes</th><th colspan="2">Anticipated absolute effects*<br/>(95% CI)</th><th rowspan="2">Relative effect<br/>(95% CI)</th><th rowspan="2">Nº of participants<br/>(studies)</th><th rowspan="2">Quality of the evidence<br/>(GRADE)</th></tr><tr><th>Risk with no parenteral agent</th><th>Risk with Parenteral</th></tr><tr><td>Cure of NTM - not measured</td><td>-</td><td>-</td><td>-</td><td>-</td><td>-</td></tr><tr><td>Death</td><td>27 per 1000</td><td>27 per 1000<br/>(4 to 189)</td><td>RR 1.00<br/>(0.14 to 6.91)</td><td>146<br/>(1 RCT)</td><td>⊕⊕⊕○<br/>MODERATE <sup>3</sup></td></tr><tr><td>Recurrence (relapse)</td><td>351 per 1000</td><td>309 per 1000<br/>(169 to 559)</td><td>RR 0.88<br/>(0.48 to 1.59)</td><td>89<br/>(1 RCT)</td><td>⊕⊕⊕○<br/>MODERATE</td></tr><tr><td>Culture Conversion</td><td>507 per 1000</td><td>715 per 1000<br/>(542 to 933)</td><td>RR 1.41<br/>(1.07 to 1.84)</td><td>146<br/>(1 RCT)</td><td>⊕⊕⊕○<br/>MODERATE <sup>3</sup></td></tr><tr><td>Any adverse reaction</td><td>205 per 1000</td><td>247 per 1000<br/>(136 to 450)</td><td>RR 1.20<br/>(0.66 to 2.19)</td><td>146<br/>(1 RCT)</td><td>⊕⊕⊕○<br/>MODERATE <sup>3</sup></td></tr><tr><td>Serious adverse events</td><td>0 per 1000</td><td>0 per 1000<br/>(0 to 0)</td><td>not estimable</td><td>146<br/>(1 RCT)</td><td>⊕⊕⊕⊕<br/>HIGH</td></tr><tr><td>Quality of life - not measured</td><td>-</td><td>-</td><td>-</td><td>-</td><td>-</td></tr><tr><td>Development of antibiotic resistance - not measured</td><td>-</td><td>-</td><td>-</td><td>-</td><td>-</td></tr></table> | Outcomes                  | Anticipated absolute effects*<br>(95% CI) |                                 | Relative effect<br>(95% CI) | Nº of participants<br>(studies) | Quality of the evidence<br>(GRADE) | Risk with no parenteral agent      | Risk with Parenteral | Cure of NTM - not measured | - | - | - | - | - | Death | 27 per 1000 | 27 per 1000<br>(4 to 189) | RR 1.00<br>(0.14 to 6.91) | 146<br>(1 RCT) | ⊕⊕⊕○<br>MODERATE <sup>3</sup> | Recurrence (relapse) | 351 per 1000 | 309 per 1000<br>(169 to 559) | RR 0.88<br>(0.48 to 1.59) | 89<br>(1 RCT) | ⊕⊕⊕○<br>MODERATE | Culture Conversion | 507 per 1000 | 715 per 1000<br>(542 to 933) | RR 1.41<br>(1.07 to 1.84) | 146<br>(1 RCT) | ⊕⊕⊕○<br>MODERATE <sup>3</sup> | Any adverse reaction | 205 per 1000 | 247 per 1000<br>(136 to 450) | RR 1.20<br>(0.66 to 2.19) | 146<br>(1 RCT) | ⊕⊕⊕○<br>MODERATE <sup>3</sup> | Serious adverse events | 0 per 1000 | 0 per 1000<br>(0 to 0) | not estimable | 146<br>(1 RCT) | ⊕⊕⊕⊕<br>HIGH | Quality of life - not measured | - | - | - | - | - | Development of antibiotic resistance - not measured | - | - | - | - | - | The undesirable anticipated effects of amikacin are larger when given for 3 months. |
|-----------------------------------------------------|---------------------------------------------------------------------------------------------------------------------------------------------------------------------------------------------------------------------------|-------------------------------------------------------------------------------------------------------------------------------------------------------------------------------------------------------------------------------------------------------------------------------------------------------------------------------------------------------------------------------------------------------------------------------------------------------------------------------------------------------------------------------------------------------------------------------------------------------------------------------------------------------------------------------------------------------------------------------------------------------------------------------------------------------------------------------------------------------------------------------------------------------------------------------------------------------------------------------------------------------------------------------------------------------------------------------------------------------------------------------------------------------------------------------------------------------------------------------------------------------------------------------------------------------------------------------------------------------------------------------------------------------------------------------------------------------------------------------------------------------------------------------------------------------------------------------------------------------------------------------|---------------------------|-------------------------------------------|---------------------------------|-----------------------------|---------------------------------|------------------------------------|------------------------------------|----------------------|----------------------------|---|---|---|---|---|-------|-------------|---------------------------|---------------------------|----------------|-------------------------------|----------------------|--------------|------------------------------|---------------------------|---------------|------------------|--------------------|--------------|------------------------------|---------------------------|----------------|-------------------------------|----------------------|--------------|------------------------------|---------------------------|----------------|-------------------------------|------------------------|------------|------------------------|---------------|----------------|--------------|--------------------------------|---|---|---|---|---|-----------------------------------------------------|---|---|---|---|---|-------------------------------------------------------------------------------------|
| Outcomes                                            | Anticipated absolute effects*<br>(95% CI)                                                                                                                                                                                 |                                                                                                                                                                                                                                                                                                                                                                                                                                                                                                                                                                                                                                                                                                                                                                                                                                                                                                                                                                                                                                                                                                                                                                                                                                                                                                                                                                                                                                                                                                                                                                                                                               |                           | Relative effect<br>(95% CI)               | Nº of participants<br>(studies) |                             |                                 |                                    | Quality of the evidence<br>(GRADE) |                      |                            |   |   |   |   |   |       |             |                           |                           |                |                               |                      |              |                              |                           |               |                  |                    |              |                              |                           |                |                               |                      |              |                              |                           |                |                               |                        |            |                        |               |                |              |                                |   |   |   |   |   |                                                     |   |   |   |   |   |                                                                                     |
|                                                     | Risk with no parenteral agent                                                                                                                                                                                             | Risk with Parenteral                                                                                                                                                                                                                                                                                                                                                                                                                                                                                                                                                                                                                                                                                                                                                                                                                                                                                                                                                                                                                                                                                                                                                                                                                                                                                                                                                                                                                                                                                                                                                                                                          |                           |                                           |                                 |                             |                                 |                                    |                                    |                      |                            |   |   |   |   |   |       |             |                           |                           |                |                               |                      |              |                              |                           |               |                  |                    |              |                              |                           |                |                               |                      |              |                              |                           |                |                               |                        |            |                        |               |                |              |                                |   |   |   |   |   |                                                     |   |   |   |   |   |                                                                                     |
| Cure of NTM - not measured                          | -                                                                                                                                                                                                                         | -                                                                                                                                                                                                                                                                                                                                                                                                                                                                                                                                                                                                                                                                                                                                                                                                                                                                                                                                                                                                                                                                                                                                                                                                                                                                                                                                                                                                                                                                                                                                                                                                                             | -                         | -                                         | -                               |                             |                                 |                                    |                                    |                      |                            |   |   |   |   |   |       |             |                           |                           |                |                               |                      |              |                              |                           |               |                  |                    |              |                              |                           |                |                               |                      |              |                              |                           |                |                               |                        |            |                        |               |                |              |                                |   |   |   |   |   |                                                     |   |   |   |   |   |                                                                                     |
| Death                                               | 27 per 1000                                                                                                                                                                                                               | 27 per 1000<br>(4 to 189)                                                                                                                                                                                                                                                                                                                                                                                                                                                                                                                                                                                                                                                                                                                                                                                                                                                                                                                                                                                                                                                                                                                                                                                                                                                                                                                                                                                                                                                                                                                                                                                                     | RR 1.00<br>(0.14 to 6.91) | 146<br>(1 RCT)                            | ⊕⊕⊕○<br>MODERATE <sup>3</sup>   |                             |                                 |                                    |                                    |                      |                            |   |   |   |   |   |       |             |                           |                           |                |                               |                      |              |                              |                           |               |                  |                    |              |                              |                           |                |                               |                      |              |                              |                           |                |                               |                        |            |                        |               |                |              |                                |   |   |   |   |   |                                                     |   |   |   |   |   |                                                                                     |
| Recurrence (relapse)                                | 351 per 1000                                                                                                                                                                                                              | 309 per 1000<br>(169 to 559)                                                                                                                                                                                                                                                                                                                                                                                                                                                                                                                                                                                                                                                                                                                                                                                                                                                                                                                                                                                                                                                                                                                                                                                                                                                                                                                                                                                                                                                                                                                                                                                                  | RR 0.88<br>(0.48 to 1.59) | 89<br>(1 RCT)                             | ⊕⊕⊕○<br>MODERATE                |                             |                                 |                                    |                                    |                      |                            |   |   |   |   |   |       |             |                           |                           |                |                               |                      |              |                              |                           |               |                  |                    |              |                              |                           |                |                               |                      |              |                              |                           |                |                               |                        |            |                        |               |                |              |                                |   |   |   |   |   |                                                     |   |   |   |   |   |                                                                                     |
| Culture Conversion                                  | 507 per 1000                                                                                                                                                                                                              | 715 per 1000<br>(542 to 933)                                                                                                                                                                                                                                                                                                                                                                                                                                                                                                                                                                                                                                                                                                                                                                                                                                                                                                                                                                                                                                                                                                                                                                                                                                                                                                                                                                                                                                                                                                                                                                                                  | RR 1.41<br>(1.07 to 1.84) | 146<br>(1 RCT)                            | ⊕⊕⊕○<br>MODERATE <sup>3</sup>   |                             |                                 |                                    |                                    |                      |                            |   |   |   |   |   |       |             |                           |                           |                |                               |                      |              |                              |                           |               |                  |                    |              |                              |                           |                |                               |                      |              |                              |                           |                |                               |                        |            |                        |               |                |              |                                |   |   |   |   |   |                                                     |   |   |   |   |   |                                                                                     |
| Any adverse reaction                                | 205 per 1000                                                                                                                                                                                                              | 247 per 1000<br>(136 to 450)                                                                                                                                                                                                                                                                                                                                                                                                                                                                                                                                                                                                                                                                                                                                                                                                                                                                                                                                                                                                                                                                                                                                                                                                                                                                                                                                                                                                                                                                                                                                                                                                  | RR 1.20<br>(0.66 to 2.19) | 146<br>(1 RCT)                            | ⊕⊕⊕○<br>MODERATE <sup>3</sup>   |                             |                                 |                                    |                                    |                      |                            |   |   |   |   |   |       |             |                           |                           |                |                               |                      |              |                              |                           |               |                  |                    |              |                              |                           |                |                               |                      |              |                              |                           |                |                               |                        |            |                        |               |                |              |                                |   |   |   |   |   |                                                     |   |   |   |   |   |                                                                                     |
| Serious adverse events                              | 0 per 1000                                                                                                                                                                                                                | 0 per 1000<br>(0 to 0)                                                                                                                                                                                                                                                                                                                                                                                                                                                                                                                                                                                                                                                                                                                                                                                                                                                                                                                                                                                                                                                                                                                                                                                                                                                                                                                                                                                                                                                                                                                                                                                                        | not estimable             | 146<br>(1 RCT)                            | ⊕⊕⊕⊕<br>HIGH                    |                             |                                 |                                    |                                    |                      |                            |   |   |   |   |   |       |             |                           |                           |                |                               |                      |              |                              |                           |               |                  |                    |              |                              |                           |                |                               |                      |              |                              |                           |                |                               |                        |            |                        |               |                |              |                                |   |   |   |   |   |                                                     |   |   |   |   |   |                                                                                     |
| Quality of life - not measured                      | -                                                                                                                                                                                                                         | -                                                                                                                                                                                                                                                                                                                                                                                                                                                                                                                                                                                                                                                                                                                                                                                                                                                                                                                                                                                                                                                                                                                                                                                                                                                                                                                                                                                                                                                                                                                                                                                                                             | -                         | -                                         | -                               |                             |                                 |                                    |                                    |                      |                            |   |   |   |   |   |       |             |                           |                           |                |                               |                      |              |                              |                           |               |                  |                    |              |                              |                           |                |                               |                      |              |                              |                           |                |                               |                        |            |                        |               |                |              |                                |   |   |   |   |   |                                                     |   |   |   |   |   |                                                                                     |
| Development of antibiotic resistance - not measured | -                                                                                                                                                                                                                         | -                                                                                                                                                                                                                                                                                                                                                                                                                                                                                                                                                                                                                                                                                                                                                                                                                                                                                                                                                                                                                                                                                                                                                                                                                                                                                                                                                                                                                                                                                                                                                                                                                             | -                         | -                                         | -                               |                             |                                 |                                    |                                    |                      |                            |   |   |   |   |   |       |             |                           |                           |                |                               |                      |              |                              |                           |               |                  |                    |              |                              |                           |                |                               |                      |              |                              |                           |                |                               |                        |            |                        |               |                |              |                                |   |   |   |   |   |                                                     |   |   |   |   |   |                                                                                     |
| UNDESIRABLE EFFECTS                                 | <p><b>How substantial are the undesirable anticipated effects?</b></p> <ul style="list-style-type: none"><li>○ Large</li><li>● Moderate</li><li>○ Small</li><li>○ Trivial</li><li>○ Varies</li><li>○ Don't know</li></ul> |                                                                                                                                                                                                                                                                                                                                                                                                                                                                                                                                                                                                                                                                                                                                                                                                                                                                                                                                                                                                                                                                                                                                                                                                                                                                                                                                                                                                                                                                                                                                                                                                                               |                           |                                           |                                 |                             |                                 |                                    |                                    |                      |                            |   |   |   |   |   |       |             |                           |                           |                |                               |                      |              |                              |                           |               |                  |                    |              |                              |                           |                |                               |                      |              |                              |                           |                |                               |                        |            |                        |               |                |              |                                |   |   |   |   |   |                                                     |   |   |   |   |   |                                                                                     |

| CERTAINTY OF EVIDENCE                | <p><b>What is the overall certainty of the evidence of effects?</b></p> <ul style="list-style-type: none"><li>○ Very low</li><li>○ Low</li><li>● Moderate</li><li>○ High</li></ul> <p>○ No included studies</p>                                                                                                                                                           | <p><b>The relative importance or values of the main outcomes of interest:</b></p> <table><tr><th>Outcome</th><th>Relative importance</th><th>Certainty of the evidence (GRADE)</th></tr><tr><td>Cure of NTM</td><td>CRITICAL</td><td>⊕○○○<br/>VERY LOW</td></tr><tr><td>Death</td><td>CRITICAL</td><td>⊕⊕⊕○<br/>MODERATE</td></tr><tr><td>Recurrence (relapse)</td><td>CRITICAL</td><td>⊕⊕⊕○<br/>MODERATE</td></tr><tr><td>Culture Conversion</td><td>CRITICAL</td><td>⊕⊕⊕○<br/>MODERATE</td></tr><tr><td>Any adverse reaction</td><td>CRITICAL</td><td>⊕⊕⊕○<br/>MODERATE</td></tr><tr><td>Serious adverse events</td><td>CRITICAL</td><td>⊕⊕⊕⊕<br/>HIGH</td></tr><tr><td>Quality of life</td><td>CRITICAL</td><td>-</td></tr><tr><td>Development of antibiotic resistance</td><td>CRITICAL</td><td>-</td></tr></table>                                                                                                                                                                           |                                   |  | Outcome | Relative importance | Certainty of the evidence (GRADE) | Cure of NTM | CRITICAL | ⊕○○○<br>VERY LOW | Death | CRITICAL | ⊕⊕⊕○<br>MODERATE | Recurrence (relapse) | CRITICAL | ⊕⊕⊕○<br>MODERATE | Culture Conversion | CRITICAL | ⊕⊕⊕○<br>MODERATE | Any adverse reaction | CRITICAL | ⊕⊕⊕○<br>MODERATE | Serious adverse events | CRITICAL | ⊕⊕⊕⊕<br>HIGH | Quality of life | CRITICAL | - | Development of antibiotic resistance | CRITICAL | - |  |
|--------------------------------------|---------------------------------------------------------------------------------------------------------------------------------------------------------------------------------------------------------------------------------------------------------------------------------------------------------------------------------------------------------------------------|---------------------------------------------------------------------------------------------------------------------------------------------------------------------------------------------------------------------------------------------------------------------------------------------------------------------------------------------------------------------------------------------------------------------------------------------------------------------------------------------------------------------------------------------------------------------------------------------------------------------------------------------------------------------------------------------------------------------------------------------------------------------------------------------------------------------------------------------------------------------------------------------------------------------------------------------------------------------------------------------------|-----------------------------------|--|---------|---------------------|-----------------------------------|-------------|----------|------------------|-------|----------|------------------|----------------------|----------|------------------|--------------------|----------|------------------|----------------------|----------|------------------|------------------------|----------|--------------|-----------------|----------|---|--------------------------------------|----------|---|--|
|                                      | Outcome                                                                                                                                                                                                                                                                                                                                                                   | Relative importance                                                                                                                                                                                                                                                                                                                                                                                                                                                                                                                                                                                                                                                                                                                                                                                                                                                                                                                                                                               | Certainty of the evidence (GRADE) |  |         |                     |                                   |             |          |                  |       |          |                  |                      |          |                  |                    |          |                  |                      |          |                  |                        |          |              |                 |          |   |                                      |          |   |  |
|                                      | Cure of NTM                                                                                                                                                                                                                                                                                                                                                               | CRITICAL                                                                                                                                                                                                                                                                                                                                                                                                                                                                                                                                                                                                                                                                                                                                                                                                                                                                                                                                                                                          | ⊕○○○<br>VERY LOW                  |  |         |                     |                                   |             |          |                  |       |          |                  |                      |          |                  |                    |          |                  |                      |          |                  |                        |          |              |                 |          |   |                                      |          |   |  |
|                                      | Death                                                                                                                                                                                                                                                                                                                                                                     | CRITICAL                                                                                                                                                                                                                                                                                                                                                                                                                                                                                                                                                                                                                                                                                                                                                                                                                                                                                                                                                                                          | ⊕⊕⊕○<br>MODERATE                  |  |         |                     |                                   |             |          |                  |       |          |                  |                      |          |                  |                    |          |                  |                      |          |                  |                        |          |              |                 |          |   |                                      |          |   |  |
|                                      | Recurrence (relapse)                                                                                                                                                                                                                                                                                                                                                      | CRITICAL                                                                                                                                                                                                                                                                                                                                                                                                                                                                                                                                                                                                                                                                                                                                                                                                                                                                                                                                                                                          | ⊕⊕⊕○<br>MODERATE                  |  |         |                     |                                   |             |          |                  |       |          |                  |                      |          |                  |                    |          |                  |                      |          |                  |                        |          |              |                 |          |   |                                      |          |   |  |
|                                      | Culture Conversion                                                                                                                                                                                                                                                                                                                                                        | CRITICAL                                                                                                                                                                                                                                                                                                                                                                                                                                                                                                                                                                                                                                                                                                                                                                                                                                                                                                                                                                                          | ⊕⊕⊕○<br>MODERATE                  |  |         |                     |                                   |             |          |                  |       |          |                  |                      |          |                  |                    |          |                  |                      |          |                  |                        |          |              |                 |          |   |                                      |          |   |  |
|                                      | Any adverse reaction                                                                                                                                                                                                                                                                                                                                                      | CRITICAL                                                                                                                                                                                                                                                                                                                                                                                                                                                                                                                                                                                                                                                                                                                                                                                                                                                                                                                                                                                          | ⊕⊕⊕○<br>MODERATE                  |  |         |                     |                                   |             |          |                  |       |          |                  |                      |          |                  |                    |          |                  |                      |          |                  |                        |          |              |                 |          |   |                                      |          |   |  |
|                                      | Serious adverse events                                                                                                                                                                                                                                                                                                                                                    | CRITICAL                                                                                                                                                                                                                                                                                                                                                                                                                                                                                                                                                                                                                                                                                                                                                                                                                                                                                                                                                                                          | ⊕⊕⊕⊕<br>HIGH                      |  |         |                     |                                   |             |          |                  |       |          |                  |                      |          |                  |                    |          |                  |                      |          |                  |                        |          |              |                 |          |   |                                      |          |   |  |
|                                      | Quality of life                                                                                                                                                                                                                                                                                                                                                           | CRITICAL                                                                                                                                                                                                                                                                                                                                                                                                                                                                                                                                                                                                                                                                                                                                                                                                                                                                                                                                                                                          | -                                 |  |         |                     |                                   |             |          |                  |       |          |                  |                      |          |                  |                    |          |                  |                      |          |                  |                        |          |              |                 |          |   |                                      |          |   |  |
| Development of antibiotic resistance | CRITICAL                                                                                                                                                                                                                                                                                                                                                                  | -                                                                                                                                                                                                                                                                                                                                                                                                                                                                                                                                                                                                                                                                                                                                                                                                                                                                                                                                                                                                 |                                   |  |         |                     |                                   |             |          |                  |       |          |                  |                      |          |                  |                    |          |                  |                      |          |                  |                        |          |              |                 |          |   |                                      |          |   |  |
| VALUES                               | <p><b>Is there important uncertainty about or variability in how much people value the main outcomes?</b></p> <ul style="list-style-type: none"><li>○ Important uncertainty or variability</li><li>● Possibly important uncertainty or variability</li><li>○ Probably no important uncertainty or variability</li><li>○ No important uncertainty or variability</li></ul> | <p>Values and preferences:</p> <p>Three relevant studies were identified that provide data on patient values and preferences:</p> <p>Mehta and Marras, 2011 evaluated the impact of pulmonary NTM on health-related quality of life. In this study, patients with pulmonary NTM had significantly impaired health-related quality of life with two QOL measures significantly lower than historical normal controls. Multivariable analysis showed an association between QOL scores and lung function</p> <p>Hong, et al, 2014 also evaluated the impact of pulmonary NTM on health-related quality of life. This was a direct comparison between patients with NTM disease and healthy subjects and found patients with NTM reported more health status issues and anxiety/depression issues than healthy controls. Lung function was also independently associated with QOL scores.</p> <p>Czaja, et al 2015 evaluated change in quality of life in response to various treatment regimens</p> |                                   |  |         |                     |                                   |             |          |                  |       |          |                  |                      |          |                  |                    |          |                  |                      |          |                  |                        |          |              |                 |          |   |                                      |          |   |  |

|                                            |                                                                                                                                                                                                                                                                                                                                                                                                                                                                      | for <i>M. abscessus</i> (many patients had coinfection with MAC or Pseudomonas). Mean QOL score was significantly improved after treatment at 3, 6, 12, and 24 months.                                                                                                                                                                                                                                                                                                                                                                                                                                                                                                                                                                                                                                                                                                                                                                                                                                                                                                                                                                                                                                                                                                                                                                                                                                                                                                                                                                                                                                                                                   |                               |                                        |                               |                          |                              |                                 |                               |                              |                                 |   |   |   |   |   |       |             |                               |                               |             |                            |                      |              |                                  |                               |            |               |                    |              |                                  |                               |             |                            |                      |              |                                  |                               |             |                            |                        |            |                            |               |             |           |                                |   |   |   |   |   |                                            |   |   |   |   |   |                                          |
|--------------------------------------------|----------------------------------------------------------------------------------------------------------------------------------------------------------------------------------------------------------------------------------------------------------------------------------------------------------------------------------------------------------------------------------------------------------------------------------------------------------------------|----------------------------------------------------------------------------------------------------------------------------------------------------------------------------------------------------------------------------------------------------------------------------------------------------------------------------------------------------------------------------------------------------------------------------------------------------------------------------------------------------------------------------------------------------------------------------------------------------------------------------------------------------------------------------------------------------------------------------------------------------------------------------------------------------------------------------------------------------------------------------------------------------------------------------------------------------------------------------------------------------------------------------------------------------------------------------------------------------------------------------------------------------------------------------------------------------------------------------------------------------------------------------------------------------------------------------------------------------------------------------------------------------------------------------------------------------------------------------------------------------------------------------------------------------------------------------------------------------------------------------------------------------------|-------------------------------|----------------------------------------|-------------------------------|--------------------------|------------------------------|---------------------------------|-------------------------------|------------------------------|---------------------------------|---|---|---|---|---|-------|-------------|-------------------------------|-------------------------------|-------------|----------------------------|----------------------|--------------|----------------------------------|-------------------------------|------------|---------------|--------------------|--------------|----------------------------------|-------------------------------|-------------|----------------------------|----------------------|--------------|----------------------------------|-------------------------------|-------------|----------------------------|------------------------|------------|----------------------------|---------------|-------------|-----------|--------------------------------|---|---|---|---|---|--------------------------------------------|---|---|---|---|---|------------------------------------------|
| BALANCE OF EFFECTS                         | <p><b>Does the balance between desirable and undesirable effects favor the intervention or the comparison?</b></p> <ul style="list-style-type: none"><li>○ Favors the comparison</li><li>○ Probably favors the comparison</li><li>○ Does not favor either the intervention or the comparison</li><li>● Probably favors the intervention</li><li>○ Favors the intervention</li></ul><br><ul style="list-style-type: none"><li>○ Varies</li><li>○ Don't know</li></ul> | <p><b>Parenteral compared to no parenteral agent for MAC</b></p> <table><tr><th rowspan="2">Outcomes</th><th colspan="2">Anticipated absolute effects* (95% CI)</th><th rowspan="2">Relative effect (95% CI)</th><th rowspan="2">Nº of participants (studies)</th><th rowspan="2">Quality of the evidence (GRADE)</th></tr><tr><th>Risk with no parenteral agent</th><th>Risk with Parenteral</th></tr><tr><td>Cure of NTM - not measured</td><td>-</td><td>-</td><td>-</td><td>-</td><td>-</td></tr><tr><td>Death</td><td>27 per 1000</td><td><b>27 per 1000</b> (4 to 189)</td><td><b>RR 1.00</b> (0.14 to 6.91)</td><td>146 (1 RCT)</td><td>⊕⊕⊕○ MODERATE <sup>3</sup></td></tr><tr><td>Recurrence (relapse)</td><td>351 per 1000</td><td><b>309 per 1000</b> (169 to 559)</td><td><b>RR 0.88</b> (0.48 to 1.59)</td><td>89 (1 RCT)</td><td>⊕⊕⊕○ MODERATE</td></tr><tr><td>Culture Conversion</td><td>507 per 1000</td><td><b>715 per 1000</b> (542 to 933)</td><td><b>RR 1.41</b> (1.07 to 1.84)</td><td>146 (1 RCT)</td><td>⊕⊕⊕○ MODERATE <sup>3</sup></td></tr><tr><td>Any adverse reaction</td><td>205 per 1000</td><td><b>247 per 1000</b> (136 to 450)</td><td><b>RR 1.20</b> (0.66 to 2.19)</td><td>146 (1 RCT)</td><td>⊕⊕⊕○ MODERATE <sup>3</sup></td></tr><tr><td>Serious adverse events</td><td>0 per 1000</td><td><b>0 per 1000</b> (0 to 0)</td><td>not estimable</td><td>146 (1 RCT)</td><td>⊕⊕⊕⊕ HIGH</td></tr><tr><td>Quality of life - not measured</td><td>-</td><td>-</td><td>-</td><td>-</td><td>-</td></tr><tr><td>Development of antibiotic resistance - not</td><td>-</td><td>-</td><td>-</td><td>-</td><td>-</td></tr></table> | Outcomes                      | Anticipated absolute effects* (95% CI) |                               | Relative effect (95% CI) | Nº of participants (studies) | Quality of the evidence (GRADE) | Risk with no parenteral agent | Risk with Parenteral         | Cure of NTM - not measured      | - | - | - | - | - | Death | 27 per 1000 | <b>27 per 1000</b> (4 to 189) | <b>RR 1.00</b> (0.14 to 6.91) | 146 (1 RCT) | ⊕⊕⊕○ MODERATE <sup>3</sup> | Recurrence (relapse) | 351 per 1000 | <b>309 per 1000</b> (169 to 559) | <b>RR 0.88</b> (0.48 to 1.59) | 89 (1 RCT) | ⊕⊕⊕○ MODERATE | Culture Conversion | 507 per 1000 | <b>715 per 1000</b> (542 to 933) | <b>RR 1.41</b> (1.07 to 1.84) | 146 (1 RCT) | ⊕⊕⊕○ MODERATE <sup>3</sup> | Any adverse reaction | 205 per 1000 | <b>247 per 1000</b> (136 to 450) | <b>RR 1.20</b> (0.66 to 2.19) | 146 (1 RCT) | ⊕⊕⊕○ MODERATE <sup>3</sup> | Serious adverse events | 0 per 1000 | <b>0 per 1000</b> (0 to 0) | not estimable | 146 (1 RCT) | ⊕⊕⊕⊕ HIGH | Quality of life - not measured | - | - | - | - | - | Development of antibiotic resistance - not | - | - | - | - | - | Intervention is with a parenteral agent. |
|                                            |                                                                                                                                                                                                                                                                                                                                                                                                                                                                      | Outcomes                                                                                                                                                                                                                                                                                                                                                                                                                                                                                                                                                                                                                                                                                                                                                                                                                                                                                                                                                                                                                                                                                                                                                                                                                                                                                                                                                                                                                                                                                                                                                                                                                                                 |                               | Anticipated absolute effects* (95% CI) |                               |                          |                              |                                 | Relative effect (95% CI)      | Nº of participants (studies) | Quality of the evidence (GRADE) |   |   |   |   |   |       |             |                               |                               |             |                            |                      |              |                                  |                               |            |               |                    |              |                                  |                               |             |                            |                      |              |                                  |                               |             |                            |                        |            |                            |               |             |           |                                |   |   |   |   |   |                                            |   |   |   |   |   |                                          |
|                                            |                                                                                                                                                                                                                                                                                                                                                                                                                                                                      |                                                                                                                                                                                                                                                                                                                                                                                                                                                                                                                                                                                                                                                                                                                                                                                                                                                                                                                                                                                                                                                                                                                                                                                                                                                                                                                                                                                                                                                                                                                                                                                                                                                          | Risk with no parenteral agent | Risk with Parenteral                   |                               |                          |                              |                                 |                               |                              |                                 |   |   |   |   |   |       |             |                               |                               |             |                            |                      |              |                                  |                               |            |               |                    |              |                                  |                               |             |                            |                      |              |                                  |                               |             |                            |                        |            |                            |               |             |           |                                |   |   |   |   |   |                                            |   |   |   |   |   |                                          |
|                                            |                                                                                                                                                                                                                                                                                                                                                                                                                                                                      | Cure of NTM - not measured                                                                                                                                                                                                                                                                                                                                                                                                                                                                                                                                                                                                                                                                                                                                                                                                                                                                                                                                                                                                                                                                                                                                                                                                                                                                                                                                                                                                                                                                                                                                                                                                                               | -                             | -                                      | -                             | -                        | -                            |                                 |                               |                              |                                 |   |   |   |   |   |       |             |                               |                               |             |                            |                      |              |                                  |                               |            |               |                    |              |                                  |                               |             |                            |                      |              |                                  |                               |             |                            |                        |            |                            |               |             |           |                                |   |   |   |   |   |                                            |   |   |   |   |   |                                          |
|                                            |                                                                                                                                                                                                                                                                                                                                                                                                                                                                      | Death                                                                                                                                                                                                                                                                                                                                                                                                                                                                                                                                                                                                                                                                                                                                                                                                                                                                                                                                                                                                                                                                                                                                                                                                                                                                                                                                                                                                                                                                                                                                                                                                                                                    | 27 per 1000                   | <b>27 per 1000</b> (4 to 189)          | <b>RR 1.00</b> (0.14 to 6.91) | 146 (1 RCT)              | ⊕⊕⊕○ MODERATE <sup>3</sup>   |                                 |                               |                              |                                 |   |   |   |   |   |       |             |                               |                               |             |                            |                      |              |                                  |                               |            |               |                    |              |                                  |                               |             |                            |                      |              |                                  |                               |             |                            |                        |            |                            |               |             |           |                                |   |   |   |   |   |                                            |   |   |   |   |   |                                          |
|                                            |                                                                                                                                                                                                                                                                                                                                                                                                                                                                      | Recurrence (relapse)                                                                                                                                                                                                                                                                                                                                                                                                                                                                                                                                                                                                                                                                                                                                                                                                                                                                                                                                                                                                                                                                                                                                                                                                                                                                                                                                                                                                                                                                                                                                                                                                                                     | 351 per 1000                  | <b>309 per 1000</b> (169 to 559)       | <b>RR 0.88</b> (0.48 to 1.59) | 89 (1 RCT)               | ⊕⊕⊕○ MODERATE                |                                 |                               |                              |                                 |   |   |   |   |   |       |             |                               |                               |             |                            |                      |              |                                  |                               |            |               |                    |              |                                  |                               |             |                            |                      |              |                                  |                               |             |                            |                        |            |                            |               |             |           |                                |   |   |   |   |   |                                            |   |   |   |   |   |                                          |
|                                            |                                                                                                                                                                                                                                                                                                                                                                                                                                                                      | Culture Conversion                                                                                                                                                                                                                                                                                                                                                                                                                                                                                                                                                                                                                                                                                                                                                                                                                                                                                                                                                                                                                                                                                                                                                                                                                                                                                                                                                                                                                                                                                                                                                                                                                                       | 507 per 1000                  | <b>715 per 1000</b> (542 to 933)       | <b>RR 1.41</b> (1.07 to 1.84) | 146 (1 RCT)              | ⊕⊕⊕○ MODERATE <sup>3</sup>   |                                 |                               |                              |                                 |   |   |   |   |   |       |             |                               |                               |             |                            |                      |              |                                  |                               |            |               |                    |              |                                  |                               |             |                            |                      |              |                                  |                               |             |                            |                        |            |                            |               |             |           |                                |   |   |   |   |   |                                            |   |   |   |   |   |                                          |
|                                            |                                                                                                                                                                                                                                                                                                                                                                                                                                                                      | Any adverse reaction                                                                                                                                                                                                                                                                                                                                                                                                                                                                                                                                                                                                                                                                                                                                                                                                                                                                                                                                                                                                                                                                                                                                                                                                                                                                                                                                                                                                                                                                                                                                                                                                                                     | 205 per 1000                  | <b>247 per 1000</b> (136 to 450)       | <b>RR 1.20</b> (0.66 to 2.19) | 146 (1 RCT)              | ⊕⊕⊕○ MODERATE <sup>3</sup>   |                                 |                               |                              |                                 |   |   |   |   |   |       |             |                               |                               |             |                            |                      |              |                                  |                               |            |               |                    |              |                                  |                               |             |                            |                      |              |                                  |                               |             |                            |                        |            |                            |               |             |           |                                |   |   |   |   |   |                                            |   |   |   |   |   |                                          |
|                                            |                                                                                                                                                                                                                                                                                                                                                                                                                                                                      | Serious adverse events                                                                                                                                                                                                                                                                                                                                                                                                                                                                                                                                                                                                                                                                                                                                                                                                                                                                                                                                                                                                                                                                                                                                                                                                                                                                                                                                                                                                                                                                                                                                                                                                                                   | 0 per 1000                    | <b>0 per 1000</b> (0 to 0)             | not estimable                 | 146 (1 RCT)              | ⊕⊕⊕⊕ HIGH                    |                                 |                               |                              |                                 |   |   |   |   |   |       |             |                               |                               |             |                            |                      |              |                                  |                               |            |               |                    |              |                                  |                               |             |                            |                      |              |                                  |                               |             |                            |                        |            |                            |               |             |           |                                |   |   |   |   |   |                                            |   |   |   |   |   |                                          |
|                                            |                                                                                                                                                                                                                                                                                                                                                                                                                                                                      | Quality of life - not measured                                                                                                                                                                                                                                                                                                                                                                                                                                                                                                                                                                                                                                                                                                                                                                                                                                                                                                                                                                                                                                                                                                                                                                                                                                                                                                                                                                                                                                                                                                                                                                                                                           | -                             | -                                      | -                             | -                        | -                            |                                 |                               |                              |                                 |   |   |   |   |   |       |             |                               |                               |             |                            |                      |              |                                  |                               |            |               |                    |              |                                  |                               |             |                            |                      |              |                                  |                               |             |                            |                        |            |                            |               |             |           |                                |   |   |   |   |   |                                            |   |   |   |   |   |                                          |
| Development of antibiotic resistance - not | -                                                                                                                                                                                                                                                                                                                                                                                                                                                                    | -                                                                                                                                                                                                                                                                                                                                                                                                                                                                                                                                                                                                                                                                                                                                                                                                                                                                                                                                                                                                                                                                                                                                                                                                                                                                                                                                                                                                                                                                                                                                                                                                                                                        | -                             | -                                      | -                             |                          |                              |                                 |                               |                              |                                 |   |   |   |   |   |       |             |                               |                               |             |                            |                      |              |                                  |                               |            |               |                    |              |                                  |                               |             |                            |                      |              |                                  |                               |             |                            |                        |            |                            |               |             |           |                                |   |   |   |   |   |                                            |   |   |   |   |   |                                          |

|                    |                                                                                                                                                                                                                                                                                                                                                                                                                          |                                      |                                                                                                                                                                                                           |
|--------------------|--------------------------------------------------------------------------------------------------------------------------------------------------------------------------------------------------------------------------------------------------------------------------------------------------------------------------------------------------------------------------------------------------------------------------|--------------------------------------|-----------------------------------------------------------------------------------------------------------------------------------------------------------------------------------------------------------|
|                    |                                                                                                                                                                                                                                                                                                                                                                                                                          | <div>measured</div> <div></div>      |                                                                                                                                                                                                           |
| RESOURCES REQUIRED | <b>How large are the resource requirements (costs)?</b> <ul style="list-style-type: none"> <li>○ Large costs</li> <li>● Moderate costs</li> <li>○ Negligible costs and savings</li> <li>○ Moderate savings</li> <li>○ Large savings</li> <li>○ Varies</li> <li>○ Don't know</li> </ul>                                                                                                                                   | No research evidence was identified. | Varies with the health system, but regardless it is likely associated with a significant cost due to need for indwelling catheter, infusion center, nursing care, cost of medication.                     |
| COST EFFECTIVENESS | <b>Does the cost-effectiveness of the intervention favor the intervention or the comparison?</b> <ul style="list-style-type: none"> <li>○ Favors the comparison</li> <li>○ Probably favors the comparison</li> <li>○ Does not favor either the intervention or the comparison</li> <li>○ Probably favors the intervention</li> <li>○ Favors the intervention</li> <li>○ Varies</li> <li>● No included studies</li> </ul> | No research evidence was identified. |                                                                                                                                                                                                           |
| EQUITY             | <b>What would be the impact on health equity?</b> <ul style="list-style-type: none"> <li>○ Reduced</li> <li>○ Probably reduced</li> <li>○ Probably no impact</li> <li>○ Probably increased</li> <li>○ Increased</li> </ul>                                                                                                                                                                                               | No research evidence was identified. | It depends on the health system coverage. If patients are not covered, there will be a reduction in equity as they should pay for the treatment to be administered (cost of the drug and administration). |

|               |                                                                                                                                                                                                                         |                                                                                                                                                                                                                                                                                                                                                                                      |                                                                                                                                                                                                                        |
|---------------|-------------------------------------------------------------------------------------------------------------------------------------------------------------------------------------------------------------------------|--------------------------------------------------------------------------------------------------------------------------------------------------------------------------------------------------------------------------------------------------------------------------------------------------------------------------------------------------------------------------------------|------------------------------------------------------------------------------------------------------------------------------------------------------------------------------------------------------------------------|
|               | <ul style="list-style-type: none"> <li>• Varies</li> <li>○ Don't know</li> </ul>                                                                                                                                        |                                                                                                                                                                                                                                                                                                                                                                                      |                                                                                                                                                                                                                        |
| ACCEPTABILITY | <b>Is the intervention acceptable to key stakeholders?</b> <ul style="list-style-type: none"> <li>○ No</li> <li>○ Probably no</li> <li>• Probably yes</li> <li>○ Yes</li> <li>○ Varies</li> <li>○ Don't know</li> </ul> | No research evidence was identified. The expert panel felt that patients would prefer to avoid parenteral therapy when no clear benefit could be identified. However, in the setting of extensive or drug resistant disease, most patients would accept the intervention.                                                                                                            |                                                                                                                                                                                                                        |
| FEASIBILITY   | <b>Is the intervention feasible to implement?</b> <ul style="list-style-type: none"> <li>○ No</li> <li>○ Probably no</li> <li>• Probably yes</li> <li>○ Yes</li> <li>○ Varies</li> <li>○ Don't know</li> </ul>          | A study by Adjemian, et al in 2014 evaluated treatment of <i>M. abscessus</i> and MAC, looking at compliance with the 2007 ATS/IDSA guidelines. This study found poor adherence with only 13% of antibiotic regimens compliant with guidelines. Of prescribed regimens for MAC, only 44% contained a macrolide, while 36% of regimens for <i>M. abscessus</i> contained a macrolide. | <p>In settings in which patients cannot access an infusion center, may not be able to self infuse at home.</p> <p>Availability of certain medications (streptomycin, amikacin, etc) in different regions/countries</p> |

## Summary of judgments

|                       | JUDGEMENT                            |                                   |                                      |                                         |  |        |                     | IMPLICATIONS |
|-----------------------|--------------------------------------|-----------------------------------|--------------------------------------|-----------------------------------------|--|--------|---------------------|--------------|
| DESIRABLE EFFECTS     | Trivial                              | Small                             | Moderate                             | Large                                   |  | Varies | Don't know          |              |
| UNDESIRABLE EFFECTS   | Large                                | Moderate                          | Small                                | Trivial                                 |  | Varies | Don't know          |              |
| CERTAINTY OF EVIDENCE | Very low                             | Low                               | Moderate                             | High                                    |  |        | No included studies |              |
| VALUES                | Important uncertainty or variability | Possibly important uncertainty or | Probably no important uncertainty or | No important uncertainty or variability |  |        |                     |              |

|                           | JUDGEMENT             |                                |                                                          |                                         |                         |               |                     | IMPLICATIONS |
|---------------------------|-----------------------|--------------------------------|----------------------------------------------------------|-----------------------------------------|-------------------------|---------------|---------------------|--------------|
|                           |                       | <b>variability</b>             | variability                                              |                                         |                         |               |                     |              |
| <b>BALANCE OF EFFECTS</b> | Favors the comparison | Probably favors the comparison | Does not favor either the intervention or the comparison | <b>Probably favors the intervention</b> | Favors the intervention | Varies        | Don't know          |              |
| <b>RESOURCES REQUIRED</b> | Large costs           | <b>Moderate costs</b>          | Negligible costs and savings                             | Moderate savings                        | Large savings           | Varies        | Don't know          |              |
| <b>COST EFFECTIVENESS</b> | Favors the comparison | Probably favors the comparison | Does not favor either the intervention or the comparison | Probably favors the intervention        | Favors the intervention | <b>Varies</b> | No included studies |              |
| <b>EQUITY</b>             | Reduced               | Probably reduced               | Probably no impact                                       | Probably increased                      | Increased               | <b>Varies</b> | Don't know          |              |
| <b>ACCEPTABILITY</b>      | No                    | Probably no                    | <b>Probably yes</b>                                      | Yes                                     |                         | Varies        | Don't know          |              |
| <b>FEASIBILITY</b>        | No                    | Probably no                    | <b>Probably yes</b>                                      | Yes                                     |                         | Varies        | Don't know          |              |

## Conclusions

**Should patients with macrolide susceptible MAC pulmonary disease be treated with a parenteral amikacin or streptomycin-containing regimen or without a parenteral amikacin or streptomycin-containing regimen?**

| TYPE OF RECOMMENDATION | Strong recommendation against the | Conditional recommendation against the | Conditional recommendation for either the intervention or | Conditional recommendation for the | Strong recommendation for the |
|------------------------|-----------------------------------|----------------------------------------|-----------------------------------------------------------|------------------------------------|-------------------------------|
|------------------------|-----------------------------------|----------------------------------------|-----------------------------------------------------------|------------------------------------|-------------------------------|

|                                      |                                                                                                                                                                                                                                                                                                                                                                                                      |                                      |                                        |                                      |                                      |
|--------------------------------------|------------------------------------------------------------------------------------------------------------------------------------------------------------------------------------------------------------------------------------------------------------------------------------------------------------------------------------------------------------------------------------------------------|--------------------------------------|----------------------------------------|--------------------------------------|--------------------------------------|
|                                      | <div>intervention</div> <div>○</div>                                                                                                                                                                                                                                                                                                                                                                 | <div>intervention</div> <div>○</div> | <div>the comparison</div> <div>○</div> | <div>intervention</div> <div>●</div> | <div>intervention</div> <div>○</div> |
| <b>RECOMMENDATION</b>                | <p>For patients with fibro-cavitary or advanced/severe bronchiectatic or macrolide resistant MAC pulmonary disease, we suggest that parenteral streptomycin or amikacin be included in the initial treatment regimen (conditional recommendation, moderate confidence in estimates of effect).</p> <p>The panel members voted unanimously for a conditional recommendation for the intervention.</p> |                                      |                                        |                                      |                                      |
| <b>JUSTIFICATION</b>                 |                                                                                                                                                                                                                                                                                                                                                                                                      |                                      |                                        |                                      |                                      |
| <b>SUBGROUP CONSIDERATIONS</b>       | <p>The addition of parenteral agents (i.e; aminoglycosides) should be discussed according to the severity of the disease and according to the radiological features (cavitary or nodular bronchiectatic disease).</p>                                                                                                                                                                                |                                      |                                        |                                      |                                      |
| <b>IMPLEMENTATION CONSIDERATIONS</b> |                                                                                                                                                                                                                                                                                                                                                                                                      |                                      |                                        |                                      |                                      |
| <b>MONITORING AND EVALUATION</b>     | <p>renal function, hearing/ototoxicity, vestibular toxicity, electrolyte disturbances</p>                                                                                                                                                                                                                                                                                                            |                                      |                                        |                                      |                                      |
| <b>RESEARCH PRIORITIES</b>           |                                                                                                                                                                                                                                                                                                                                                                                                      |                                      |                                        |                                      |                                      |

**Table E4.6. Question VI**

**In patients with macrolide-susceptible MAC pulmonary disease, should a regimen with inhaled amikacin or a regimen without inhaled amikacin be used for treatment?**

**POPULATION:** MAC pulmonary infection

**INTERVENTION:** a regimen with inhaled antibiotics



**COMPARISON:** a regimen without inhaled antibiotics

**MAIN OUTCOMES:** Cure of NTM; Death; Recurrence (relapse); Culture Conversion; Any Adverse Effect; Serious Adverse Effect; Withdrawal owing to adverse effects; Quality of Life; Development of Antibiotic Resistance;

## Assessment

|                     | JUDGEMENT                                                                                                                                                                                                                 | RESEARCH EVIDENCE    |                                                     |                                                        |                                 |                                        |                                        | ADDITIONAL CONSIDERATIONS |
|---------------------|---------------------------------------------------------------------------------------------------------------------------------------------------------------------------------------------------------------------------|----------------------|-----------------------------------------------------|--------------------------------------------------------|---------------------------------|----------------------------------------|----------------------------------------|---------------------------|
| DESIRABLE EFFECTS   | <b>How substantial are the desirable anticipated effects?</b> <ul style="list-style-type: none"> <li>○ Trivial</li> <li>○ Small</li> <li>○ Moderate</li> <li>○ Large</li> <li>○ Varies</li> <li>● Don't know</li> </ul>   |                      |                                                     |                                                        |                                 |                                        |                                        |                           |
|                     | <b>How substantial are the undesirable anticipated effects?</b> <ul style="list-style-type: none"> <li>○ Large</li> <li>○ Moderate</li> <li>○ Small</li> <li>○ Trivial</li> <li>○ Varies</li> <li>● Don't know</li> </ul> |                      |                                                     |                                                        |                                 |                                        |                                        |                           |
| UNDESIRABLE EFFECTS |                                                                                                                                                                                                                           | <b>Outcomes</b>      | <b>Anticipated absolute effects* (95% CI)</b>       |                                                        | <b>Relative effect (95% CI)</b> | <b>Nº of participants (studies)</b>    | <b>Quality of the evidence (GRADE)</b> | <b>Comments</b>           |
|                     |                                                                                                                                                                                                                           |                      | <b>Risk with a regimen with inhaled antibiotics</b> | <b>Risk with a regimen without inhaled antibiotics</b> |                                 |                                        |                                        |                           |
|                     |                                                                                                                                                                                                                           | Cure of NTM          | Study population                                    |                                                        | not estimable                   | 3 (1 observational study)              | ⊕○○○<br>VERY LOW <sup>a</sup>          |                           |
|                     |                                                                                                                                                                                                                           |                      | 3/3 (100%)                                          | --                                                     |                                 |                                        |                                        |                           |
|                     |                                                                                                                                                                                                                           | Death                | Study population                                    |                                                        | -                               | 9 (2 observational studies)            | ⊕○○○<br>VERY LOW <sup>a</sup>          |                           |
|                     |                                                                                                                                                                                                                           |                      | 2/9 (22.2%)                                         | --                                                     |                                 |                                        |                                        |                           |
|                     |                                                                                                                                                                                                                           | Recurrence (relapse) | Study population                                    |                                                        | -                               | 21 (1 RCT and 2 observational studies) | ⊕⊕⊕○<br>MODERATE                       |                           |
|                     |                                                                                                                                                                                                                           |                      | 9/21 (42.9%)                                        | --                                                     |                                 |                                        |                                        |                           |

|                                      |                                                                                                                                                                                                                                  |               |               |                                            |                               |  |
|--------------------------------------|----------------------------------------------------------------------------------------------------------------------------------------------------------------------------------------------------------------------------------|---------------|---------------|--------------------------------------------|-------------------------------|--|
| Culture Conversion                   | Study population                                                                                                                                                                                                                 |               | -             | 68<br>(1 RCT and 2 observational studies)  | ⊕⊕○○<br>LOW <sup>b c</sup>    |  |
|                                      | 16/40 (40.0%)                                                                                                                                                                                                                    | 1/28 (3.6%)   |               |                                            |                               |  |
| Any Adverse Effect                   | Study population                                                                                                                                                                                                                 |               | -             | 104<br>(1 RCT and 2 observational studies) | ⊕⊕○○<br>LOW <sup>b d</sup>    |  |
|                                      | 46/59 (78.0%)                                                                                                                                                                                                                    | 40/45 (88.9%) |               |                                            |                               |  |
| Serious Adverse Effect               | Study population                                                                                                                                                                                                                 |               | -             | 104<br>(1 RCT and 2 observational studies) | ⊕⊕○○<br>LOW <sup>b e</sup>    |  |
|                                      | 8/59 (13.6%)                                                                                                                                                                                                                     | 4/45 (8.9%)   |               |                                            |                               |  |
| Withdrawal owing to adverse effects  | Study population                                                                                                                                                                                                                 |               | -             | 124<br>(1 RCT and 3 observational studies) | ⊕⊕○○<br>LOW <sup>b f</sup>    |  |
|                                      | 15/79 (19.0%)                                                                                                                                                                                                                    | 0/45 (0.0%)   |               |                                            |                               |  |
| Quality of Life                      | Study used Quality of Life - Bronchiectasis - Nontuberculous Mycobacteria Module scores with no significant difference (p=0.204) between the inhaled antibiotic group (-7.9 [14.2], n=36) and placebo group (-2.8 [13.7], n=36). |               | -             | (1 RCT)                                    | ⊕⊕⊕○<br>MODERATE <sup>g</sup> |  |
| Development of Antibiotic Resistance | Study population                                                                                                                                                                                                                 |               | not estimable | 89<br>(1 RCT)                              | ⊕⊕⊕○<br>MODERATE <sup>g</sup> |  |
|                                      | 3/44 (6.8%)                                                                                                                                                                                                                      | 2/45 (4.4%)   |               |                                            |                               |  |

- a. Studies were case series without a control group
- b. Included 2 case series without a control group
- c. Conversion with inhaled antibiotics ranged from 30% to 80%
- d. Adverse effects ranged from 30% in case series to over 90% in RCT
- e. Ranged from 0% in case series to nearly 20% in RCT
- f. Ranged from 0% to 35% in inhaled group.
- g. Included both MAC and M abscessus

|                       |                                                                                                                                                                                                                                                                                                                                                                                |                                                                                                                                                                                                                                                                                                                                                                                                                                                                                                                                                                                                                               |  |
|-----------------------|--------------------------------------------------------------------------------------------------------------------------------------------------------------------------------------------------------------------------------------------------------------------------------------------------------------------------------------------------------------------------------|-------------------------------------------------------------------------------------------------------------------------------------------------------------------------------------------------------------------------------------------------------------------------------------------------------------------------------------------------------------------------------------------------------------------------------------------------------------------------------------------------------------------------------------------------------------------------------------------------------------------------------|--|
|                       |                                                                                                                                                                                                                                                                                                                                                                                |                                                                                                                                                                                                                                                                                                                                                                                                                                                                                                                                                                                                                               |  |
| CERTAINTY OF EVIDENCE | <p><b>What is the overall certainty of the evidence of effects?</b></p> <ul style="list-style-type: none"> <li>● Very low</li> <li>○ Low</li> <li>○ Moderate</li> <li>○ High</li> <li>○ No included studies</li> </ul>                                                                                                                                                         |                                                                                                                                                                                                                                                                                                                                                                                                                                                                                                                                                                                                                               |  |
| VALUES                | <p><b>Is there important uncertainty about or variability in how much people value the main outcomes?</b></p> <ul style="list-style-type: none"> <li>○ Important uncertainty or variability</li> <li>● Possibly important uncertainty or variability</li> <li>○ Probably no important uncertainty or variability</li> <li>○ No important uncertainty or variability</li> </ul> | <p>Values and preferences:</p> <p>Three relevant studies were identified that provide data on patient values and preferences:</p> <p>Mehta and Marras, 2011 evaluated the impact of pulmonary NTM on health-related quality of life. In this study, patients with pulmonary NTM had significantly impaired health-related quality of life with two QOL measures significantly lower than historical normal controls. Multivariable analysis showed an association between QOL scores and lung function.</p> <p>Hong, et al, 2014 also evaluated the impact of pulmonary NTM on health-related quality of life. This was a</p> |  |

|                    |                                                                                                                                                                                                                                                                                                                                                                                                                         |                                                                                                                                                                                                                                                                                                                                                                                                                                                                                                                                                    |  |  |  |  |  |  |
|--------------------|-------------------------------------------------------------------------------------------------------------------------------------------------------------------------------------------------------------------------------------------------------------------------------------------------------------------------------------------------------------------------------------------------------------------------|----------------------------------------------------------------------------------------------------------------------------------------------------------------------------------------------------------------------------------------------------------------------------------------------------------------------------------------------------------------------------------------------------------------------------------------------------------------------------------------------------------------------------------------------------|--|--|--|--|--|--|
|                    |                                                                                                                                                                                                                                                                                                                                                                                                                         | <p>direct comparison between patients with NTM disease and healthy subjects and found patients with NTM reported more health status issues and anxiety/depression issues than healthy controls. Lung function was also independently associated with QOL scores.</p> <p>Czaja, et al 2015 evaluated change in quality of life in response to various treatment regimens for <i>M. abscessus</i> (many patients had coinfection with MAC or Pseudomonas). Mean QOL score was significantly improved after treatment at 3, 6, 12, and 24 months.</p> |  |  |  |  |  |  |
| BALANCE OF EFFECTS | <p><b>Does the balance between desirable and undesirable effects favor the intervention or the comparison?</b></p> <ul style="list-style-type: none"><li>○ Favors the comparison</li><li>○ Probably favors the comparison</li><li>● Does not favor either the intervention or the comparison</li><li>○ Probably favors the intervention</li><li>○ Favors the intervention</li></ul> <p>○ Varies</p> <p>○ Don't know</p> |                                                                                                                                                                                                                                                                                                                                                                                                                                                                                                                                                    |  |  |  |  |  |  |
|                    |                                                                                                                                                                                                                                                                                                                                                                                                                         |                                                                                                                                                                                                                                                                                                                                                                                                                                                                                                                                                    |  |  |  |  |  |  |
|                    |                                                                                                                                                                                                                                                                                                                                                                                                                         |                                                                                                                                                                                                                                                                                                                                                                                                                                                                                                                                                    |  |  |  |  |  |  |
|                    |                                                                                                                                                                                                                                                                                                                                                                                                                         |                                                                                                                                                                                                                                                                                                                                                                                                                                                                                                                                                    |  |  |  |  |  |  |
|                    |                                                                                                                                                                                                                                                                                                                                                                                                                         |                                                                                                                                                                                                                                                                                                                                                                                                                                                                                                                                                    |  |  |  |  |  |  |
|                    |                                                                                                                                                                                                                                                                                                                                                                                                                         |                                                                                                                                                                                                                                                                                                                                                                                                                                                                                                                                                    |  |  |  |  |  |  |
|                    |                                                                                                                                                                                                                                                                                                                                                                                                                         |                                                                                                                                                                                                                                                                                                                                                                                                                                                                                                                                                    |  |  |  |  |  |  |
|                    |                                                                                                                                                                                                                                                                                                                                                                                                                         |                                                                                                                                                                                                                                                                                                                                                                                                                                                                                                                                                    |  |  |  |  |  |  |
|                    |                                                                                                                                                                                                                                                                                                                                                                                                                         |                                                                                                                                                                                                                                                                                                                                                                                                                                                                                                                                                    |  |  |  |  |  |  |
|                    |                                                                                                                                                                                                                                                                                                                                                                                                                         |                                                                                                                                                                                                                                                                                                                                                                                                                                                                                                                                                    |  |  |  |  |  |  |
|                    |                                                                                                                                                                                                                                                                                                                                                                                                                         |                                                                                                                                                                                                                                                                                                                                                                                                                                                                                                                                                    |  |  |  |  |  |  |
|                    |                                                                                                                                                                                                                                                                                                                                                                                                                         |                                                                                                                                                                                                                                                                                                                                                                                                                                                                                                                                                    |  |  |  |  |  |  |
|                    |                                                                                                                                                                                                                                                                                                                                                                                                                         |                                                                                                                                                                                                                                                                                                                                                                                                                                                                                                                                                    |  |  |  |  |  |  |
|                    |                                                                                                                                                                                                                                                                                                                                                                                                                         |                                                                                                                                                                                                                                                                                                                                                                                                                                                                                                                                                    |  |  |  |  |  |  |
|                    |                                                                                                                                                                                                                                                                                                                                                                                                                         |                                                                                                                                                                                                                                                                                                                                                                                                                                                                                                                                                    |  |  |  |  |  |  |
|                    |                                                                                                                                                                                                                                                                                                                                                                                                                         |                                                                                                                                                                                                                                                                                                                                                                                                                                                                                                                                                    |  |  |  |  |  |  |
|                    |                                                                                                                                                                                                                                                                                                                                                                                                                         |                                                                                                                                                                                                                                                                                                                                                                                                                                                                                                                                                    |  |  |  |  |  |  |
|                    |                                                                                                                                                                                                                                                                                                                                                                                                                         |                                                                                                                                                                                                                                                                                                                                                                                                                                                                                                                                                    |  |  |  |  |  |  |
|                    |                                                                                                                                                                                                                                                                                                                                                                                                                         |                                                                                                                                                                                                                                                                                                                                                                                                                                                                                                                                                    |  |  |  |  |  |  |
|                    |                                                                                                                                                                                                                                                                                                                                                                                                                         |                                                                                                                                                                                                                                                                                                                                                                                                                                                                                                                                                    |  |  |  |  |  |  |
|                    |                                                                                                                                                                                                                                                                                                                                                                                                                         |                                                                                                                                                                                                                                                                                                                                                                                                                                                                                                                                                    |  |  |  |  |  |  |
|                    |                                                                                                                                                                                                                                                                                                                                                                                                                         |                                                                                                                                                                                                                                                                                                                                                                                                                                                                                                                                                    |  |  |  |  |  |  |
|                    |                                                                                                                                                                                                                                                                                                                                                                                                                         |                                                                                                                                                                                                                                                                                                                                                                                                                                                                                                                                                    |  |  |  |  |  |  |
|                    |                                                                                                                                                                                                                                                                                                                                                                                                                         |                                                                                                                                                                                                                                                                                                                                                                                                                                                                                                                                                    |  |  |  |  |  |  |
|                    |                                                                                                                                                                                                                                                                                                                                                                                                                         |                                                                                                                                                                                                                                                                                                                                                                                                                                                                                                                                                    |  |  |  |  |  |  |
|                    |                                                                                                                                                                                                                                                                                                                                                                                                                         |                                                                                                                                                                                                                                                                                                                                                                                                                                                                                                                                                    |  |  |  |  |  |  |
|                    |                                                                                                                                                                                                                                                                                                                                                                                                                         |                                                                                                                                                                                                                                                                                                                                                                                                                                                                                                                                                    |  |  |  |  |  |  |
|                    |                                                                                                                                                                                                                                                                                                                                                                                                                         |                                                                                                                                                                                                                                                                                                                                                                                                                                                                                                                                                    |  |  |  |  |  |  |
|                    |                                                                                                                                                                                                                                                                                                                                                                                                                         |                                                                                                                                                                                                                                                                                                                                                                                                                                                                                                                                                    |  |  |  |  |  |  |
|                    |                                                                                                                                                                                                                                                                                                                                                                                                                         |                                                                                                                                                                                                                                                                                                                                                                                                                                                                                                                                                    |  |  |  |  |  |  |
|                    |                                                                                                                                                                                                                                                                                                                                                                                                                         |                                                                                                                                                                                                                                                                                                                                                                                                                                                                                                                                                    |  |  |  |  |  |  |
|                    |                                                                                                                                                                                                                                                                                                                                                                                                                         |                                                                                                                                                                                                                                                                                                                                                                                                                                                                                                                                                    |  |  |  |  |  |  |
|                    |                                                                                                                                                                                                                                                                                                                                                                                                                         |                                                                                                                                                                                                                                                                                                                                                                                                                                                                                                                                                    |  |  |  |  |  |  |
|                    |                                                                                                                                                                                                                                                                                                                                                                                                                         |                                                                                                                                                                                                                                                                                                                                                                                                                                                                                                                                                    |  |  |  |  |  |  |
|                    |                                                                                                                                                                                                                                                                                                                                                                                                                         |                                                                                                                                                                                                                                                                                                                                                                                                                                                                                                                                                    |  |  |  |  |  |  |
|                    |                                                                                                                                                                                                                                                                                                                                                                                                                         |                                                                                                                                                                                                                                                                                                                                                                                                                                                                                                                                                    |  |  |  |  |  |  |
|                    |                                                                                                                                                                                                                                                                                                                                                                                                                         |                                                                                                                                                                                                                                                                                                                                                                                                                                                                                                                                                    |  |  |  |  |  |  |
|                    |                                                                                                                                                                                                                                                                                                                                                                                                                         |                                                                                                                                                                                                                                                                                                                                                                                                                                                                                                                                                    |  |  |  |  |  |  |
|                    |                                                                                                                                                                                                                                                                                                                                                                                                                         |                                                                                                                                                                                                                                                                                                                                                                                                                                                                                                                                                    |  |  |  |  |  |  |
|                    |                                                                                                                                                                                                                                                                                                                                                                                                                         |                                                                                                                                                                                                                                                                                                                                                                                                                                                                                                                                                    |  |  |  |  |  |  |
|                    |                                                                                                                                                                                                                                                                                                                                                                                                                         |                                                                                                                                                                                                                                                                                                                                                                                                                                                                                                                                                    |  |  |  |  |  |  |
|                    |                                                                                                                                                                                                                                                                                                                                                                                                                         |                                                                                                                                                                                                                                                                                                                                                                                                                                                                                                                                                    |  |  |  |  |  |  |
|                    |                                                                                                                                                                                                                                                                                                                                                                                                                         |                                                                                                                                                                                                                                                                                                                                                                                                                                                                                                                                                    |  |  |  |  |  |  |
|                    |                                                                                                                                                                                                                                                                                                                                                                                                                         |                                                                                                                                                                                                                                                                                                                                                                                                                                                                                                                                                    |  |  |  |  |  |  |
|                    |                                                                                                                                                                                                                                                                                                                                                                                                                         |                                                                                                                                                                                                                                                                                                                                                                                                                                                                                                                                                    |  |  |  |  |  |  |
|                    |                                                                                                                                                                                                                                                                                                                                                                                                                         |                                                                                                                                                                                                                                                                                                                                                                                                                                                                                                                                                    |  |  |  |  |  |  |
|                    |                                                                                                                                                                                                                                                                                                                                                                                                                         |                                                                                                                                                                                                                                                                                                                                                                                                                                                                                                                                                    |  |  |  |  |  |  |
|                    |                                                                                                                                                                                                                                                                                                                                                                                                                         |                                                                                                                                                                                                                                                                                                                                                                                                                                                                                                                                                    |  |  |  |  |  |  |
|                    |                                                                                                                                                                                                                                                                                                                                                                                                                         |                                                                                                                                                                                                                                                                                                                                                                                                                                                                                                                                                    |  |  |  |  |  |  |
|                    |                                                                                                                                                                                                                                                                                                                                                                                                                         |                                                                                                                                                                                                                                                                                                                                                                                                                                                                                                                                                    |  |  |  |  |  |  |
|                    |                                                                                                                                                                                                                                                                                                                                                                                                                         |                                                                                                                                                                                                                                                                                                                                                                                                                                                                                                                                                    |  |  |  |  |  |  |
|                    |                                                                                                                                                                                                                                                                                                                                                                                                                         |                                                                                                                                                                                                                                                                                                                                                                                                                                                                                                                                                    |  |  |  |  |  |  |
|                    |                                                                                                                                                                                                                                                                                                                                                                                                                         |                                                                                                                                                                                                                                                                                                                                                                                                                                                                                                                                                    |  |  |  |  |  |  |
|                    |                                                                                                                                                                                                                                                                                                                                                                                                                         |                                                                                                                                                                                                                                                                                                                                                                                                                                                                                                                                                    |  |  |  |  |  |  |
|                    |                                                                                                                                                                                                                                                                                                                                                                                                                         |                                                                                                                                                                                                                                                                                                                                                                                                                                                                                                                                                    |  |  |  |  |  |  |
|                    |                                                                                                                                                                                                                                                                                                                                                                                                                         |                                                                                                                                                                                                                                                                                                                                                                                                                                                                                                                                                    |  |  |  |  |  |  |
|                    |                                                                                                                                                                                                                                                                                                                                                                                                                         |                                                                                                                                                                                                                                                                                                                                                                                                                                                                                                                                                    |  |  |  |  |  |  |
|                    |                                                                                                                                                                                                                                                                                                                                                                                                                         |                                                                                                                                                                                                                                                                                                                                                                                                                                                                                                                                                    |  |  |  |  |  |  |
|                    |                                                                                                                                                                                                                                                                                                                                                                                                                         |                                                                                                                                                                                                                                                                                                                                                                                                                                                                                                                                                    |  |  |  |  |  |  |
|                    |                                                                                                                                                                                                                                                                                                                                                                                                                         |                                                                                                                                                                                                                                                                                                                                                                                                                                                                                                                                                    |  |  |  |  |  |  |
|                    |                                                                                                                                                                                                                                                                                                                                                                                                                         |                                                                                                                                                                                                                                                                                                                                                                                                                                                                                                                                                    |  |  |  |  |  |  |
|                    |                                                                                                                                                                                                                                                                                                                                                                                                                         |                                                                                                                                                                                                                                                                                                                                                                                                                                                                                                                                                    |  |  |  |  |  |  |
|                    |                                                                                                                                                                                                                                                                                                                                                                                                                         |                                                                                                                                                                                                                                                                                                                                                                                                                                                                                                                                                    |  |  |  |  |  |  |
|                    |                                                                                                                                                                                                                                                                                                                                                                                                                         |                                                                                                                                                                                                                                                                                                                                                                                                                                                                                                                                                    |  |  |  |  |  |  |
|                    |                                                                                                                                                                                                                                                                                                                                                                                                                         |                                                                                                                                                                                                                                                                                                                                                                                                                                                                                                                                                    |  |  |  |  |  |  |
|                    |                                                                                                                                                                                                                                                                                                                                                                                                                         |                                                                                                                                                                                                                                                                                                                                                                                                                                                                                                                                                    |  |  |  |  |  |  |
|                    |                                                                                                                                                                                                                                                                                                                                                                                                                         |                                                                                                                                                                                                                                                                                                                                                                                                                                                                                                                                                    |  |  |  |  |  |  |
|                    |                                                                                                                                                                                                                                                                                                                                                                                                                         |                                                                                                                                                                                                                                                                                                                                                                                                                                                                                                                                                    |  |  |  |  |  |  |
|                    |                                                                                                                                                                                                                                                                                                                                                                                                                         |                                                                                                                                                                                                                                                                                                                                                                                                                                                                                                                                                    |  |  |  |  |  |  |
|                    |                                                                                                                                                                                                                                                                                                                                                                                                                         |                                                                                                                                                                                                                                                                                                                                                                                                                                                                                                                                                    |  |  |  |  |  |  |
|                    |                                                                                                                                                                                                                                                                                                                                                                                                                         |                                                                                                                                                                                                                                                                                                                                                                                                                                                                                                                                                    |  |  |  |  |  |  |
|                    |                                                                                                                                                                                                                                                                                                                                                                                                                         |                                                                                                                                                                                                                                                                                                                                                                                                                                                                                                                                                    |  |  |  |  |  |  |
|                    |                                                                                                                                                                                                                                                                                                                                                                                                                         |                                                                                                                                                                                                                                                                                                                                                                                                                                                                                                                                                    |  |  |  |  |  |  |
|                    |                                                                                                                                                                                                                                                                                                                                                                                                                         |                                                                                                                                                                                                                                                                                                                                                                                                                                                                                                                                                    |  |  |  |  |  |  |
|                    |                                                                                                                                                                                                                                                                                                                                                                                                                         |                                                                                                                                                                                                                                                                                                                                                                                                                                                                                                                                                    |  |  |  |  |  |  |
|                    |                                                                                                                                                                                                                                                                                                                                                                                                                         |                                                                                                                                                                                                                                                                                                                                                                                                                                                                                                                                                    |  |  |  |  |  |  |
|                    |                                                                                                                                                                                                                                                                                                                                                                                                                         |                                                                                                                                                                                                                                                                                                                                                                                                                                                                                                                                                    |  |  |  |  |  |  |
|                    |                                                                                                                                                                                                                                                                                                                                                                                                                         |                                                                                                                                                                                                                                                                                                                                                                                                                                                                                                                                                    |  |  |  |  |  |  |
|                    |                                                                                                                                                                                                                                                                                                                                                                                                                         |                                                                                                                                                                                                                                                                                                                                                                                                                                                                                                                                                    |  |  |  |  |  |  |
|                    |                                                                                                                                                                                                                                                                                                                                                                                                                         |                                                                                                                                                                                                                                                                                                                                                                                                                                                                                                                                                    |  |  |  |  |  |  |
|                    |                                                                                                                                                                                                                                                                                                                                                                                                                         |                                                                                                                                                                                                                                                                                                                                                                                                                                                                                                                                                    |  |  |  |  |  |  |
|                    |                                                                                                                                                                                                                                                                                                                                                                                                                         |                                                                                                                                                                                                                                                                                                                                                                                                                                                                                                                                                    |  |  |  |  |  |  |
|                    |                                                                                                                                                                                                                                                                                                                                                                                                                         |                                                                                                                                                                                                                                                                                                                                                                                                                                                                                                                                                    |  |  |  |  |  |  |
|                    |                                                                                                                                                                                                                                                                                                                                                                                                                         |                                                                                                                                                                                                                                                                                                                                                                                                                                                                                                                                                    |  |  |  |  |  |  |
|                    |                                                                                                                                                                                                                                                                                                                                                                                                                         |                                                                                                                                                                                                                                                                                                                                                                                                                                                                                                                                                    |  |  |  |  |  |  |
|                    |                                                                                                                                                                                                                                                                                                                                                                                                                         |                                                                                                                                                                                                                                                                                                                                                                                                                                                                                                                                                    |  |  |  |  |  |  |
|                    |                                                                                                                                                                                                                                                                                                                                                                                                                         |                                                                                                                                                                                                                                                                                                                                                                                                                                                                                                                                                    |  |  |  |  |  |  |
|                    |                                                                                                                                                                                                                                                                                                                                                                                                                         |                                                                                                                                                                                                                                                                                                                                                                                                                                                                                                                                                    |  |  |  |  |  |  |
|                    |                                                                                                                                                                                                                                                                                                                                                                                                                         |                                                                                                                                                                                                                                                                                                                                                                                                                                                                                                                                                    |  |  |  |  |  |  |
|                    |                                                                                                                                                                                                                                                                                                                                                                                                                         |                                                                                                                                                                                                                                                                                                                                                                                                                                                                                                                                                    |  |  |  |  |  |  |
|                    |                                                                                                                                                                                                                                                                                                                                                                                                                         |                                                                                                                                                                                                                                                                                                                                                                                                                                                                                                                                                    |  |  |  |  |  |  |
|                    |                                                                                                                                                                                                                                                                                                                                                                                                                         |                                                                                                                                                                                                                                                                                                                                                                                                                                                                                                                                                    |  |  |  |  |  |  |
|                    |                                                                                                                                                                                                                                                                                                                                                                                                                         |                                                                                                                                                                                                                                                                                                                                                                                                                                                                                                                                                    |  |  |  |  |  |  |
|                    |                                                                                                                                                                                                                                                                                                                                                                                                                         |                                                                                                                                                                                                                                                                                                                                                                                                                                                                                                                                                    |  |  |  |  |  |  |
|                    |                                                                                                                                                                                                                                                                                                                                                                                                                         |                                                                                                                                                                                                                                                                                                                                                                                                                                                                                                                                                    |  |  |  |  |  |  |
|                    |                                                                                                                                                                                                                                                                                                                                                                                                                         |                                                                                                                                                                                                                                                                                                                                                                                                                                                                                                                                                    |  |  |  |  |  |  |
|                    |                                                                                                                                                                                                                                                                                                                                                                                                                         |                                                                                                                                                                                                                                                                                                                                                                                                                                                                                                                                                    |  |  |  |  |  |  |
|                    |                                                                                                                                                                                                                                                                                                                                                                                                                         |                                                                                                                                                                                                                                                                                                                                                                                                                                                                                                                                                    |  |  |  |  |  |  |
|                    |                                                                                                                                                                                                                                                                                                                                                                                                                         |                                                                                                                                                                                                                                                                                                                                                                                                                                                                                                                                                    |  |  |  |  |  |  |
|                    |                                                                                                                                                                                                                                                                                                                                                                                                                         |                                                                                                                                                                                                                                                                                                                                                                                                                                                                                                                                                    |  |  |  |  |  |  |
|                    |                                                                                                                                                                                                                                                                                                                                                                                                                         |                                                                                                                                                                                                                                                                                                                                                                                                                                                                                                                                                    |  |  |  |  |  |  |
|                    |                                                                                                                                                                                                                                                                                                                                                                                                                         |                                                                                                                                                                                                                                                                                                                                                                                                                                                                                                                                                    |  |  |  |  |  |  |
|                    |                                                                                                                                                                                                                                                                                                                                                                                                                         |                                                                                                                                                                                                                                                                                                                                                                                                                                                                                                                                                    |  |  |  |  |  |  |
|                    |                                                                                                                                                                                                                                                                                                                                                                                                                         |                                                                                                                                                                                                                                                                                                                                                                                                                                                                                                                                                    |  |  |  |  |  |  |
|                    |                                                                                                                                                                                                                                                                                                                                                                                                                         |                                                                                                                                                                                                                                                                                                                                                                                                                                                                                                                                                    |  |  |  |  |  |  |
|                    |                                                                                                                                                                                                                                                                                                                                                                                                                         |                                                                                                                                                                                                                                                                                                                                                                                                                                                                                                                                                    |  |  |  |  |  |  |
|                    |                                                                                                                                                                                                                                                                                                                                                                                                                         |                                                                                                                                                                                                                                                                                                                                                                                                                                                                                                                                                    |  |  |  |  |  |  |
|                    |                                                                                                                                                                                                                                                                                                                                                                                                                         |                                                                                                                                                                                                                                                                                                                                                                                                                                                                                                                                                    |  |  |  |  |  |  |
|                    |                                                                                                                                                                                                                                                                                                                                                                                                                         |                                                                                                                                                                                                                                                                                                                                                                                                                                                                                                                                                    |  |  |  |  |  |  |
|                    |                                                                                                                                                                                                                                                                                                                                                                                                                         |                                                                                                                                                                                                                                                                                                                                                                                                                                                                                                                                                    |  |  |  |  |  |  |
|                    |                                                                                                                                                                                                                                                                                                                                                                                                                         |                                                                                                                                                                                                                                                                                                                                                                                                                                                                                                                                                    |  |  |  |  |  |  |
|                    |                                                                                                                                                                                                                                                                                                                                                                                                                         |                                                                                                                                                                                                                                                                                                                                                                                                                                                                                                                                                    |  |  |  |  |  |  |
|                    |                                                                                                                                                                                                                                                                                                                                                                                                                         |                                                                                                                                                                                                                                                                                                                                                                                                                                                                                                                                                    |  |  |  |  |  |  |
|                    |                                                                                                                                                                                                                                                                                                                                                                                                                         |                                                                                                                                                                                                                                                                                                                                                                                                                                                                                                                                                    |  |  |  |  |  |  |
|                    |                                                                                                                                                                                                                                                                                                                                                                                                                         |                                                                                                                                                                                                                                                                                                                                                                                                                                                                                                                                                    |  |  |  |  |  |  |
|                    |                                                                                                                                                                                                                                                                                                                                                                                                                         |                                                                                                                                                                                                                                                                                                                                                                                                                                                                                                                                                    |  |  |  |  |  |  |
|                    |                                                                                                                                                                                                                                                                                                                                                                                                                         |                                                                                                                                                                                                                                                                                                                                                                                                                                                                                                                                                    |  |  |  |  |  |  |
|                    |                                                                                                                                                                                                                                                                                                                                                                                                                         |                                                                                                                                                                                                                                                                                                                                                                                                                                                                                                                                                    |  |  |  |  |  |  |
|                    |                                                                                                                                                                                                                                                                                                                                                                                                                         |                                                                                                                                                                                                                                                                                                                                                                                                                                                                                                                                                    |  |  |  |  |  |  |
|                    |                                                                                                                                                                                                                                                                                                                                                                                                                         |                                                                                                                                                                                                                                                                                                                                                                                                                                                                                                                                                    |  |  |  |  |  |  |
|                    |                                                                                                                                                                                                                                                                                                                                                                                                                         |                                                                                                                                                                                                                                                                                                                                                                                                                                                                                                                                                    |  |  |  |  |  |  |
|                    |                                                                                                                                                                                                                                                                                                                                                                                                                         |                                                                                                                                                                                                                                                                                                                                                                                                                                                                                                                                                    |  |  |  |  |  |  |
|                    |                                                                                                                                                                                                                                                                                                                                                                                                                         |                                                                                                                                                                                                                                                                                                                                                                                                                                                                                                                                                    |  |  |  |  |  |  |
|                    |                                                                                                                                                                                                                                                                                                                                                                                                                         |                                                                                                                                                                                                                                                                                                                                                                                                                                                                                                                                                    |  |  |  |  |  |  |
|                    |                                                                                                                                                                                                                                                                                                                                                                                                                         |                                                                                                                                                                                                                                                                                                                                                                                                                                                                                                                                                    |  |  |  |  |  |  |
|                    |                                                                                                                                                                                                                                                                                                                                                                                                                         |                                                                                                                                                                                                                                                                                                                                                                                                                                                                                                                                                    |  |  |  |  |  |  |
|                    |                                                                                                                                                                                                                                                                                                                                                                                                                         |                                                                                                                                                                                                                                                                                                                                                                                                                                                                                                                                                    |  |  |  |  |  |  |
|                    |                                                                                                                                                                                                                                                                                                                                                                                                                         |                                                                                                                                                                                                                                                                                                                                                                                                                                                                                                                                                    |  |  |  |  |  |  |
|                    |                                                                                                                                                                                                                                                                                                                                                                                                                         |                                                                                                                                                                                                                                                                                                                                                                                                                                                                                                                                                    |  |  |  |  |  |  |
|                    |                                                                                                                                                                                                                                                                                                                                                                                                                         |                                                                                                                                                                                                                                                                                                                                                                                                                                                                                                                                                    |  |  |  |  |  |  |
|                    |                                                                                                                                                                                                                                                                                                                                                                                                                         |                                                                                                                                                                                                                                                                                                                                                                                                                                                                                                                                                    |  |  |  |  |  |  |
|                    |                                                                                                                                                                                                                                                                                                                                                                                                                         |                                                                                                                                                                                                                                                                                                                                                                                                                                                                                                                                                    |  |  |  |  |  |  |
|                    |                                                                                                                                                                                                                                                                                                                                                                                                                         |                                                                                                                                                                                                                                                                                                                                                                                                                                                                                                                                                    |  |  |  |  |  |  |
|                    |                                                                                                                                                                                                                                                                                                                                                                                                                         |                                                                                                                                                                                                                                                                                                                                                                                                                                                                                                                                                    |  |  |  |  |  |  |
|                    |                                                                                                                                                                                                                                                                                                                                                                                                                         |                                                                                                                                                                                                                                                                                                                                                                                                                                                                                                                                                    |  |  |  |  |  |  |
|                    |                                                                                                                                                                                                                                                                                                                                                                                                                         |                                                                                                                                                                                                                                                                                                                                                                                                                                                                                                                                                    |  |  |  |  |  |  |
|                    |                                                                                                                                                                                                                                                                                                                                                                                                                         |                                                                                                                                                                                                                                                                                                                                                                                                                                                                                                                                                    |  |  |  |  |  |  |
|                    |                                                                                                                                                                                                                                                                                                                                                                                                                         |                                                                                                                                                                                                                                                                                                                                                                                                                                                                                                                                                    |  |  |  |  |  |  |
|                    |                                                                                                                                                                                                                                                                                                                                                                                                                         |                                                                                                                                                                                                                                                                                                                                                                                                                                                                                                                                                    |  |  |  |  |  |  |
|                    |                                                                                                                                                                                                                                                                                                                                                                                                                         |                                                                                                                                                                                                                                                                                                                                                                                                                                                                                                                                                    |  |  |  |  |  |  |
|                    |                                                                                                                                                                                                                                                                                                                                                                                                                         |                                                                                                                                                                                                                                                                                                                                                                                                                                                                                                                                                    |  |  |  |  |  |  |
|                    |                                                                                                                                                                                                                                                                                                                                                                                                                         |                                                                                                                                                                                                                                                                                                                                                                                                                                                                                                                                                    |  |  |  |  |  |  |
|                    |                                                                                                                                                                                                                                                                                                                                                                                                                         |                                                                                                                                                                                                                                                                                                                                                                                                                                                                                                                                                    |  |  |  |  |  |  |
|                    |                                                                                                                                                                                                                                                                                                                                                                                                                         |                                                                                                                                                                                                                                                                                                                                                                                                                                                                                                                                                    |  |  |  |  |  |  |
|                    |                                                                                                                                                                                                                                                                                                                                                                                                                         |                                                                                                                                                                                                                                                                                                                                                                                                                                                                                                                                                    |  |  |  |  |  |  |
|                    |                                                                                                                                                                                                                                                                                                                                                                                                                         |                                                                                                                                                                                                                                                                                                                                                                                                                                                                                                                                                    |  |  |  |  |  |  |
|                    |                                                                                                                                                                                                                                                                                                                                                                                                                         |                                                                                                                                                                                                                                                                                                                                                                                                                                                                                                                                                    |  |  |  |  |  |  |
|                    |                                                                                                                                                                                                                                                                                                                                                                                                                         |                                                                                                                                                                                                                                                                                                                                                                                                                                                                                                                                                    |  |  |  |  |  |  |
|                    |                                                                                                                                                                                                                                                                                                                                                                                                                         |                                                                                                                                                                                                                                                                                                                                                                                                                                                                                                                                                    |  |  |  |  |  |  |
|                    |                                                                                                                                                                                                                                                                                                                                                                                                                         |                                                                                                                                                                                                                                                                                                                                                                                                                                                                                                                                                    |  |  |  |  |  |  |
|                    |                                                                                                                                                                                                                                                                                                                                                                                                                         |                                                                                                                                                                                                                                                                                                                                                                                                                                                                                                                                                    |  |  |  |  |  |  |
|                    |                                                                                                                                                                                                                                                                                                                                                                                                                         |                                                                                                                                                                                                                                                                                                                                                                                                                                                                                                                                                    |  |  |  |  |  |  |
|                    |                                                                                                                                                                                                                                                                                                                                                                                                                         |                                                                                                                                                                                                                                                                                                                                                                                                                                                                                                                                                    |  |  |  |  |  |  |
|                    |                                                                                                                                                                                                                                                                                                                                                                                                                         |                                                                                                                                                                                                                                                                                                                                                                                                                                                                                                                                                    |  |  |  |  |  |  |
|                    |                                                                                                                                                                                                                                                                                                                                                                                                                         |                                                                                                                                                                                                                                                                                                                                                                                                                                                                                                                                                    |  |  |  |  |  |  |
|                    |                                                                                                                                                                                                                                                                                                                                                                                                                         |                                                                                                                                                                                                                                                                                                                                                                                                                                                                                                                                                    |  |  |  |  |  |  |
|                    |                                                                                                                                                                                                                                                                                                                                                                                                                         |                                                                                                                                                                                                                                                                                                                                                                                                                                                                                                                                                    |  |  |  |  |  |  |
|                    |                                                                                                                                                                                                                                                                                                                                                                                                                         |                                                                                                                                                                                                                                                                                                                                                                                                                                                                                                                                                    |  |  |  |  |  |  |
|                    |                                                                                                                                                                                                                                                                                                                                                                                                                         |                                                                                                                                                                                                                                                                                                                                                                                                                                                                                                                                                    |  |  |  |  |  |  |
|                    |                                                                                                                                                                                                                                                                                                                                                                                                                         |                                                                                                                                                                                                                                                                                                                                                                                                                                                                                                                                                    |  |  |  |  |  |  |
|                    |                                                                                                                                                                                                                                                                                                                                                                                                                         |                                                                                                                                                                                                                                                                                                                                                                                                                                                                                                                                                    |  |  |  |  |  |  |
|                    |                                                                                                                                                                                                                                                                                                                                                                                                                         |                                                                                                                                                                                                                                                                                                                                                                                                                                                                                                                                                    |  |  |  |  |  |  |
|                    |                                                                                                                                                                                                                                                                                                                                                                                                                         |                                                                                                                                                                                                                                                                                                                                                                                                                                                                                                                                                    |  |  |  |  |  |  |
|                    |                                                                                                                                                                                                                                                                                                                                                                                                                         |                                                                                                                                                                                                                                                                                                                                                                                                                                                                                                                                                    |  |  |  |  |  |  |
|                    |                                                                                                                                                                                                                                                                                                                                                                                                                         |                                                                                                                                                                                                                                                                                                                                                                                                                                                                                                                                                    |  |  |  |  |  |  |
|                    |                                                                                                                                                                                                                                                                                                                                                                                                                         |                                                                                                                                                                                                                                                                                                                                                                                                                                                                                                                                                    |  |  |  |  |  |  |
|                    |                                                                                                                                                                                                                                                                                                                                                                                                                         |                                                                                                                                                                                                                                                                                                                                                                                                                                                                                                                                                    |  |  |  |  |  |  |
|                    |                                                                                                                                                                                                                                                                                                                                                                                                                         |                                                                                                                                                                                                                                                                                                                                                                                                                                                                                                                                                    |  |  |  |  |  |  |
|                    |                                                                                                                                                                                                                                                                                                                                                                                                                         |                                                                                                                                                                                                                                                                                                                                                                                                                                                                                                                                                    |  |  |  |  |  |  |
|                    |                                                                                                                                                                                                                                                                                                                                                                                                                         |                                                                                                                                                                                                                                                                                                                                                                                                                                                                                                                                                    |  |  |  |  |  |  |
|                    |                                                                                                                                                                                                                                                                                                                                                                                                                         |                                                                                                                                                                                                                                                                                                                                                                                                                                                                                                                                                    |  |  |  |  |  |  |
|                    |                                                                                                                                                                                                                                                                                                                                                                                                                         |                                                                                                                                                                                                                                                                                                                                                                                                                                                                                                                                                    |  |  |  |  |  |  |
|                    |                                                                                                                                                                                                                                                                                                                                                                                                                         |                                                                                                                                                                                                                                                                                                                                                                                                                                                                                                                                                    |  |  |  |  |  |  |
|                    |                                                                                                                                                                                                                                                                                                                                                                                                                         |                                                                                                                                                                                                                                                                                                                                                                                                                                                                                                                                                    |  |  |  |  |  |  |
|                    |                                                                                                                                                                                                                                                                                                                                                                                                                         |                                                                                                                                                                                                                                                                                                                                                                                                                                                                                                                                                    |  |  |  |  |  |  |
|                    |                                                                                                                                                                                                                                                                                                                                                                                                                         |                                                                                                                                                                                                                                                                                                                                                                                                                                                                                                                                                    |  |  |  |  |  |  |
|                    |                                                                                                                                                                                                                                                                                                                                                                                                                         |                                                                                                                                                                                                                                                                                                                                                                                                                                                                                                                                                    |  |  |  |  |  |  |
|                    |                                                                                                                                                                                                                                                                                                                                                                                                                         |                                                                                                                                                                                                                                                                                                                                                                                                                                                                                                                                                    |  |  |  |  |  |  |
|                    |                                                                                                                                                                                                                                                                                                                                                                                                                         |                                                                                                                                                                                                                                                                                                                                                                                                                                                                                                                                                    |  |  |  |  |  |  |
|                    |                                                                                                                                                                                                                                                                                                                                                                                                                         |                                                                                                                                                                                                                                                                                                                                                                                                                                                                                                                                                    |  |  |  |  |  |  |
|                    |                                                                                                                                                                                                                                                                                                                                                                                                                         |                                                                                                                                                                                                                                                                                                                                                                                                                                                                                                                                                    |  |  |  |  |  |  |
|                    |                                                                                                                                                                                                                                                                                                                                                                                                                         |                                                                                                                                                                                                                                                                                                                                                                                                                                                                                                                                                    |  |  |  |  |  |  |
|                    |                                                                                                                                                                                                                                                                                                                                                                                                                         |                                                                                                                                                                                                                                                                                                                                                                                                                                                                                                                                                    |  |  |  |  |  |  |
|                    |                                                                                                                                                                                                                                                                                                                                                                                                                         |                                                                                                                                                                                                                                                                                                                                                                                                                                                                                                                                                    |  |  |  |  |  |  |
|                    |                                                                                                                                                                                                                                                                                                                                                                                                                         |                                                                                                                                                                                                                                                                                                                                                                                                                                                                                                                                                    |  |  |  |  |  |  |
|                    |                                                                                                                                                                                                                                                                                                                                                                                                                         |                                                                                                                                                                                                                                                                                                                                                                                                                                                                                                                                                    |  |  |  |  |  |  |
|                    |                                                                                                                                                                                                                                                                                                                                                                                                                         |                                                                                                                                                                                                                                                                                                                                                                                                                                                                                                                                                    |  |  |  |  |  |  |
|                    |                                                                                                                                                                                                                                                                                                                                                                                                                         |                                                                                                                                                                                                                                                                                                                                                                                                                                                                                                                                                    |  |  |  |  |  |  |
|                    |                                                                                                                                                                                                                                                                                                                                                                                                                         |                                                                                                                                                                                                                                                                                                                                                                                                                                                                                                                                                    |  |  |  |  |  |  |
|                    |                                                                                                                                                                                                                                                                                                                                                                                                                         |                                                                                                                                                                                                                                                                                                                                                                                                                                                                                                                                                    |  |  |  |  |  |  |
|                    |                                                                                                                                                                                                                                                                                                                                                                                                                         |                                                                                                                                                                                                                                                                                                                                                                                                                                                                                                                                                    |  |  |  |  |  |  |
|                    |                                                                                                                                                                                                                                                                                                                                                                                                                         |                                                                                                                                                                                                                                                                                                                                                                                                                                                                                                                                                    |  |  |  |  |  |  |
|                    |                                                                                                                                                                                                                                                                                                                                                                                                                         |                                                                                                                                                                                                                                                                                                                                                                                                                                                                                                                                                    |  |  |  |  |  |  |
|                    |                                                                                                                                                                                                                                                                                                                                                                                                                         |                                                                                                                                                                                                                                                                                                                                                                                                                                                                                                                                                    |  |  |  |  |  |  |
|                    |                                                                                                                                                                                                                                                                                                                                                                                                                         |                                                                                                                                                                                                                                                                                                                                                                                                                                                                                                                                                    |  |  |  |  |  |  |
|                    |                                                                                                                                                                                                                                                                                                                                                                                                                         |                                                                                                                                                                                                                                                                                                                                                                                                                                                                                                                                                    |  |  |  |  |  |  |
|                    |                                                                                                                                                                                                                                                                                                                                                                                                                         |                                                                                                                                                                                                                                                                                                                                                                                                                                                                                                                                                    |  |  |  |  |  |  |
|                    |                                                                                                                                                                                                                                                                                                                                                                                                                         |                                                                                                                                                                                                                                                                                                                                                                                                                                                                                                                                                    |  |  |  |  |  |  |
|                    |                                                                                                                                                                                                                                                                                                                                                                                                                         |                                                                                                                                                                                                                                                                                                                                                                                                                                                                                                                                                    |  |  |  |  |  |  |
|                    |                                                                                                                                                                                                                                                                                                                                                                                                                         |                                                                                                                                                                                                                                                                                                                                                                                                                                                                                                                                                    |  |  |  |  |  |  |
|                    |                                                                                                                                                                                                                                                                                                                                                                                                                         |                                                                                                                                                                                                                                                                                                                                                                                                                                                                                                                                                    |  |  |  |  |  |  |
|                    |                                                                                                                                                                                                                                                                                                                                                                                                                         |                                                                                                                                                                                                                                                                                                                                                                                                                                                                                                                                                    |  |  |  |  |  |  |
|                    |                                                                                                                                                                                                                                                                                                                                                                                                                         |                                                                                                                                                                                                                                                                                                                                                                                                                                                                                                                                                    |  |  |  |  |  |  |
|                    |                                                                                                                                                                                                                                                                                                                                                                                                                         |                                                                                                                                                                                                                                                                                                                                                                                                                                                                                                                                                    |  |  |  |  |  |  |
|                    |                                                                                                                                                                                                                                                                                                                                                                                                                         |                                                                                                                                                                                                                                                                                                                                                                                                                                                                                                                                                    |  |  |  |  |  |  |
|                    |                                                                                                                                                                                                                                                                                                                                                                                                                         |                                                                                                                                                                                                                                                                                                                                                                                                                                                                                                                                                    |  |  |  |  |  |  |
|                    |                                                                                                                                                                                                                                                                                                                                                                                                                         |                                                                                                                                                                                                                                                                                                                                                                                                                                                                                                                                                    |  |  |  |  |  |  |
|                    |                                                                                                                                                                                                                                                                                                                                                                                                                         |                                                                                                                                                                                                                                                                                                                                                                                                                                                                                                                                                    |  |  |  |  |  |  |
|                    |                                                                                                                                                                                                                                                                                                                                                                                                                         |                                                                                                                                                                                                                                                                                                                                                                                                                                                                                                                                                    |  |  |  |  |  |  |
|                    |                                                                                                                                                                                                                                                                                                                                                                                                                         |                                                                                                                                                                                                                                                                                                                                                                                                                                                                                                                                                    |  |  |  |  |  |  |
|                    |                                                                                                                                                                                                                                                                                                                                                                                                                         |                                                                                                                                                                                                                                                                                                                                                                                                                                                                                                                                                    |  |  |  |  |  |  |
|                    |                                                                                                                                                                                                                                                                                                                                                                                                                         |                                                                                                                                                                                                                                                                                                                                                                                                                                                                                                                                                    |  |  |  |  |  |  |
|                    |                                                                                                                                                                                                                                                                                                                                                                                                                         |                                                                                                                                                                                                                                                                                                                                                                                                                                                                                                                                                    |  |  |  |  |  |  |
|                    |                                                                                                                                                                                                                                                                                                                                                                                                                         |                                                                                                                                                                                                                                                                                                                                                                                                                                                                                                                                                    |  |  |  |  |  |  |
|                    |                                                                                                                                                                                                                                                                                                                                                                                                                         |                                                                                                                                                                                                                                                                                                                                                                                                                                                                                                                                                    |  |  |  |  |  |  |
|                    |                                                                                                                                                                                                                                                                                                                                                                                                                         |                                                                                                                                                                                                                                                                                                                                                                                                                                                                                                                                                    |  |  |  |  |  |  |
|                    |                                                                                                                                                                                                                                                                                                                                                                                                                         |                                                                                                                                                                                                                                                                                                                                                                                                                                                                                                                                                    |  |  |  |  |  |  |
|                    |                                                                                                                                                                                                                                                                                                                                                                                                                         |                                                                                                                                                                                                                                                                                                                                                                                                                                                                                                                                                    |  |  |  |  |  |  |
|                    |                                                                                                                                                                                                                                                                                                                                                                                                                         |                                                                                                                                                                                                                                                                                                                                                                                                                                                                                                                                                    |  |  |  |  |  |  |
|                    |                                                                                                                                                                                                                                                                                                                                                                                                                         |                                                                                                                                                                                                                                                                                                                                                                                                                                                                                                                                                    |  |  |  |  |  |  |
|                    |                                                                                                                                                                                                                                                                                                                                                                                                                         |                                                                                                                                                                                                                                                                                                                                                                                                                                                                                                                                                    |  |  |  |  |  |  |
|                    |                                                                                                                                                                                                                                                                                                                                                                                                                         |                                                                                                                                                                                                                                                                                                                                                                                                                                                                                                                                                    |  |  |  |  |  |  |
|                    |                                                                                                                                                                                                                                                                                                                                                                                                                         |                                                                                                                                                                                                                                                                                                                                                                                                                                                                                                                                                    |  |  |  |  |  |  |
|                    |                                                                                                                                                                                                                                                                                                                                                                                                                         |                                                                                                                                                                                                                                                                                                                                                                                                                                                                                                                                                    |  |  |  |  |  |  |
|                    |                                                                                                                                                                                                                                                                                                                                                                                                                         |                                                                                                                                                                                                                                                                                                                                                                                                                                                                                                                                                    |  |  |  |  |  |  |
|                    |                                                                                                                                                                                                                                                                                                                                                                                                                         |                                                                                                                                                                                                                                                                                                                                                                                                                                                                                                                                                    |  |  |  |  |  |  |
|                    |                                                                                                                                                                                                                                                                                                                                                                                                                         |                                                                                                                                                                                                                                                                                                                                                                                                                                                                                                                                                    |  |  |  |  |  |  |
|                    |                                                                                                                                                                                                                                                                                                                                                                                                                         |                                                                                                                                                                                                                                                                                                                                                                                                                                                                                                                                                    |  |  |  |  |  |  |
|                    |                                                                                                                                                                                                                                                                                                                                                                                                                         |                                                                                                                                                                                                                                                                                                                                                                                                                                                                                                                                                    |  |  |  |  |  |  |
|                    |                                                                                                                                                                                                                                                                                                                                                                                                                         |                                                                                                                                                                                                                                                                                                                                                                                                                                                                                                                                                    |  |  |  |  |  |  |
|                    |                                                                                                                                                                                                                                                                                                                                                                                                                         |                                                                                                                                                                                                                                                                                                                                                                                                                                                                                                                                                    |  |  |  |  |  |  |
|                    |                                                                                                                                                                                                                                                                                                                                                                                                                         |                                                                                                                                                                                                                                                                                                                                                                                                                                                                                                                                                    |  |  |  |  |  |  |
|                    |                                                                                                                                                                                                                                                                                                                                                                                                                         |                                                                                                                                                                                                                                                                                                                                                                                                                                                                                                                                                    |  |  |  |  |  |  |
|                    |                                                                                                                                                                                                                                                                                                                                                                                                                         |                                                                                                                                                                                                                                                                                                                                                                                                                                                                                                                                                    |  |  |  |  |  |  |
|                    |                                                                                                                                                                                                                                                                                                                                                                                                                         |                                                                                                                                                                                                                                                                                                                                                                                                                                                                                                                                                    |  |  |  |  |  |  |
|                    |                                                                                                                                                                                                                                                                                                                                                                                                                         |                                                                                                                                                                                                                                                                                                                                                                                                                                                                                                                                                    |  |  |  |  |  |  |
|                    |                                                                                                                                                                                                                                                                                                                                                                                                                         |                                                                                                                                                                                                                                                                                                                                                                                                                                                                                                                                                    |  |  |  |  |  |  |
|                    |                                                                                                                                                                                                                                                                                                                                                                                                                         |                                                                                                                                                                                                                                                                                                                                                                                                                                                                                                                                                    |  |  |  |  |  |  |
|                    |                                                                                                                                                                                                                                                                                                                                                                                                                         |                                                                                                                                                                                                                                                                                                                                                                                                                                                                                                                                                    |  |  |  |  |  |  |
|                    |                                                                                                                                                                                                                                                                                                                                                                                                                         |                                                                                                                                                                                                                                                                                                                                                                                                                                                                                                                                                    |  |  |  |  |  |  |
|                    |                                                                                                                                                                                                                                                                                                                                                                                                                         |                                                                                                                                                                                                                                                                                                                                                                                                                                                                                                                                                    |  |  |  |  |  |  |
|                    |                                                                                                                                                                                                                                                                                                                                                                                                                         |                                                                                                                                                                                                                                                                                                                                                                                                                                                                                                                                                    |  |  |  |  |  |  |
|                    |                                                                                                                                                                                                                                                                                                                                                                                                                         |                                                                                                                                                                                                                                                                                                                                                                                                                                                                                                                                                    |  |  |  |  |  |  |
|                    |                                                                                                                                                                                                                                                                                                                                                                                                                         |                                                                                                                                                                                                                                                                                                                                                                                                                                                                                                                                                    |  |  |  |  |  |  |
|                    |                                                                                                                                                                                                                                                                                                                                                                                                                         |                                                                                                                                                                                                                                                                                                                                                                                                                                                                                                                                                    |  |  |  |  |  |  |
|                    |                                                                                                                                                                                                                                                                                                                                                                                                                         |                                                                                                                                                                                                                                                                                                                                                                                                                                                                                                                                                    |  |  |  |  |  |  |
|                    |                                                                                                                                                                                                                                                                                                                                                                                                                         |                                                                                                                                                                                                                                                                                                                                                                                                                                                                                                                                                    |  |  |  |  |  |  |
|                    |                                                                                                                                                                                                                                                                                                                                                                                                                         |                                                                                                                                                                                                                                                                                                                                                                                                                                                                                                                                                    |  |  |  |  |  |  |
|                    |                                                                                                                                                                                                                                                                                                                                                                                                                         |                                                                                                                                                                                                                                                                                                                                                                                                                                                                                                                                                    |  |  |  |  |  |  |
|                    |                                                                                                                                                                                                                                                                                                                                                                                                                         |                                                                                                                                                                                                                                                                                                                                                                                                                                                                                                                                                    |  |  |  |  |  |  |
|                    |                                                                                                                                                                                                                                                                                                                                                                                                                         |                                                                                                                                                                                                                                                                                                                                                                                                                                                                                                                                                    |  |  |  |  |  |  |
|                    |                                                                                                                                                                                                                                                                                                                                                                                                                         |                                                                                                                                                                                                                                                                                                                                                                                                                                                                                                                                                    |  |  |  |  |  |  |
|                    |                                                                                                                                                                                                                                                                                                                                                                                                                         |                                                                                                                                                                                                                                                                                                                                                                                                                                                                                                                                                    |  |  |  |  |  |  |
|                    |                                                                                                                                                                                                                                                                                                                                                                                                                         |                                                                                                                                                                                                                                                                                                                                                                                                                                                                                                                                                    |  |  |  |  |  |  |
|                    |                                                                                                                                                                                                                                                                                                                                                                                                                         |                                                                                                                                                                                                                                                                                                                                                                                                                                                                                                                                                    |  |  |  |  |  |  |
|                    |                                                                                                                                                                                                                                                                                                                                                                                                                         |                                                                                                                                                                                                                                                                                                                                                                                                                                                                                                                                                    |  |  |  |  |  |  |
|                    |                                                                                                                                                                                                                                                                                                                                                                                                                         |                                                                                                                                                                                                                                                                                                                                                                                                                                                                                                                                                    |  |  |  |  |  |  |
|                    |                                                                                                                                                                                                                                                                                                                                                                                                                         |                                                                                                                                                                                                                                                                                                                                                                                                                                                                                                                                                    |  |  |  |  |  |  |
|                    |                                                                                                                                                                                                                                                                                                                                                                                                                         |                                                                                                                                                                                                                                                                                                                                                                                                                                                                                                                                                    |  |  |  |  |  |  |
|                    |                                                                                                                                                                                                                                                                                                                                                                                                                         |                                                                                                                                                                                                                                                                                                                                                                                                                                                                                                                                                    |  |  |  |  |  |  |
|                    |                                                                                                                                                                                                                                                                                                                                                                                                                         |                                                                                                                                                                                                                                                                                                                                                                                                                                                                                                                                                    |  |  |  |  |  |  |
|                    |                                                                                                                                                                                                                                                                                                                                                                                                                         |                                                                                                                                                                                                                                                                                                                                                                                                                                                                                                                                                    |  |  |  |  |  |  |
|                    |                                                                                                                                                                                                                                                                                                                                                                                                                         |                                                                                                                                                                                                                                                                                                                                                                                                                                                                                                                                                    |  |  |  |  |  |  |
|                    |                                                                                                                                                                                                                                                                                                                                                                                                                         |                                                                                                                                                                                                                                                                                                                                                                                                                                                                                                                                                    |  |  |  |  |  |  |
|                    |                                                                                                                                                                                                                                                                                                                                                                                                                         |                                                                                                                                                                                                                                                                                                                                                                                                                                                                                                                                                    |  |  |  |  |  |  |
|                    |                                                                                                                                                                                                                                                                                                                                                                                                                         |                                                                                                                                                                                                                                                                                                                                                                                                                                                                                                                                                    |  |  |  |  |  |  |
|                    |                                                                                                                                                                                                                                                                                                                                                                                                                         |                                                                                                                                                                                                                                                                                                                                                                                                                                                                                                                                                    |  |  |  |  |  |  |
|                    |                                                                                                                                                                                                                                                                                                                                                                                                                         |                                                                                                                                                                                                                                                                                                                                                                                                                                                                                                                                                    |  |  |  |  |  |  |
|                    |                                                                                                                                                                                                                                                                                                                                                                                                                         |                                                                                                                                                                                                                                                                                                                                                                                                                                                                                                                                                    |  |  |  |  |  |  |
|                    |                                                                                                                                                                                                                                                                                                                                                                                                                         |                                                                                                                                                                                                                                                                                                                                                                                                                                                                                                                                                    |  |  |  |  |  |  |
|                    |                                                                                                                                                                                                                                                                                                                                                                                                                         |                                                                                                                                                                                                                                                                                                                                                                                                                                                                                                                                                    |  |  |  |  |  |  |
|                    |                                                                                                                                                                                                                                                                                                                                                                                                                         |                                                                                                                                                                                                                                                                                                                                                                                                                                                                                                                                                    |  |  |  |  |  |  |
|                    |                                                                                                                                                                                                                                                                                                                                                                                                                         |                                                                                                                                                                                                                                                                                                                                                                                                                                                                                                                                                    |  |  |  |  |  |  |
|                    |                                                                                                                                                                                                                                                                                                                                                                                                                         |                                                                                                                                                                                                                                                                                                                                                                                                                                                                                                                                                    |  |  |  |  |  |  |
|                    |                                                                                                                                                                                                                                                                                                                                                                                                                         |                                                                                                                                                                                                                                                                                                                                                                                                                                                                                                                                                    |  |  |  |  |  |  |
|                    |                                                                                                                                                                                                                                                                                                                                                                                                                         |                                                                                                                                                                                                                                                                                                                                                                                                                                                                                                                                                    |  |  |  |  |  |  |
|                    |                                                                                                                                                                                                                                                                                                                                                                                                                         |                                                                                                                                                                                                                                                                                                                                                                                                                                                                                                                                                    |  |  |  |  |  |  |
|                    |                                                                                                                                                                                                                                                                                                                                                                                                                         |                                                                                                                                                                                                                                                                                                                                                                                                                                                                                                                                                    |  |  |  |  |  |  |
|                    |                                                                                                                                                                                                                                                                                                                                                                                                                         |                                                                                                                                                                                                                                                                                                                                                                                                                                                                                                                                                    |  |  |  |  |  |  |
|                    |                                                                                                                                                                                                                                                                                                                                                                                                                         |                                                                                                                                                                                                                                                                                                                                                                                                                                                                                                                                                    |  |  |  |  |  |  |
|                    |                                                                                                                                                                                                                                                                                                                                                                                                                         |                                                                                                                                                                                                                                                                                                                                                                                                                                                                                                                                                    |  |  |  |  |  |  |
|                    |                                                                                                                                                                                                                                                                                                                                                                                                                         |                                                                                                                                                                                                                                                                                                                                                                                                                                                                                                                                                    |  |  |  |  |  |  |
|                    |                                                                                                                                                                                                                                                                                                                                                                                                                         |                                                                                                                                                                                                                                                                                                                                                                                                                                                                                                                                                    |  |  |  |  |  |  |
|                    |                                                                                                                                                                                                                                                                                                                                                                                                                         |                                                                                                                                                                                                                                                                                                                                                                                                                                                                                                                                                    |  |  |  |  |  |  |
|                    |                                                                                                                                                                                                                                                                                                                                                                                                                         |                                                                                                                                                                                                                                                                                                                                                                                                                                                                                                                                                    |  |  |  |  |  |  |
|                    |                                                                                                                                                                                                                                                                                                                                                                                                                         |                                                                                                                                                                                                                                                                                                                                                                                                                                                                                                                                                    |  |  |  |  |  |  |
|                    |                                                                                                                                                                                                                                                                                                                                                                                                                         |                                                                                                                                                                                                                                                                                                                                                                                                                                                                                                                                                    |  |  |  |  |  |  |
|                    |                                                                                                                                                                                                                                                                                                                                                                                                                         |                                                                                                                                                                                                                                                                                                                                                                                                                                                                                                                                                    |  |  |  |  |  |  |
|                    |                                                                                                                                                                                                                                                                                                                                                                                                                         |                                                                                                                                                                                                                                                                                                                                                                                                                                                                                                                                                    |  |  |  |  |  |  |
|                    |                                                                                                                                                                                                                                                                                                                                                                                                                         |                                                                                                                                                                                                                                                                                                                                                                                                                                                                                                                                                    |  |  |  |  |  |  |
|                    |                                                                                                                                                                                                                                                                                                                                                                                                                         |                                                                                                                                                                                                                                                                                                                                                                                                                                                                                                                                                    |  |  |  |  |  |  |
|                    |                                                                                                                                                                                                                                                                                                                                                                                                                         |                                                                                                                                                                                                                                                                                                                                                                                                                                                                                                                                                    |  |  |  |  |  |  |
|                    |                                                                                                                                                                                                                                                                                                                                                                                                                         |                                                                                                                                                                                                                                                                                                                                                                                                                                                                                                                                                    |  |  |  |  |  |  |
|                    |                                                                                                                                                                                                                                                                                                                                                                                                                         |                                                                                                                                                                                                                                                                                                                                                                                                                                                                                                                                                    |  |  |  |  |  |  |
|                    |                                                                                                                                                                                                                                                                                                                                                                                                                         |                                                                                                                                                                                                                                                                                                                                                                                                                                                                                                                                                    |  |  |  |  |  |  |
|                    |                                                                                                                                                                                                                                                                                                                                                                                                                         |                                                                                                                                                                                                                                                                                                                                                                                                                                                                                                                                                    |  |  |  |  |  |  |
|                    |                                                                                                                                                                                                                                                                                                                                                                                                                         |                                                                                                                                                                                                                                                                                                                                                                                                                                                                                                                                                    |  |  |  |  |  |  |
|                    |                                                                                                                                                                                                                                                                                                                                                                                                                         |                                                                                                                                                                                                                                                                                                                                                                                                                                                                                                                                                    |  |  |  |  |  |  |
|                    |                                                                                                                                                                                                                                                                                                                                                                                                                         |                                                                                                                                                                                                                                                                                                                                                                                                                                                                                                                                                    |  |  |  |  |  |  |
|                    |                                                                                                                                                                                                                                                                                                                                                                                                                         |                                                                                                                                                                                                                                                                                                                                                                                                                                                                                                                                                    |  |  |  |  |  |  |
|                    |                                                                                                                                                                                                                                                                                                                                                                                                                         |                                                                                                                                                                                                                                                                                                                                                                                                                                                                                                                                                    |  |  |  |  |  |  |
|                    |                                                                                                                                                                                                                                                                                                                                                                                                                         |                                                                                                                                                                                                                                                                                                                                                                                                                                                                                                                                                    |  |  |  |  |  |  |
|                    |                                                                                                                                                                                                                                                                                                                                                                                                                         |                                                                                                                                                                                                                                                                                                                                                                                                                                                                                                                                                    |  |  |  |  |  |  |
|                    |                                                                                                                                                                                                                                                                                                                                                                                                                         |                                                                                                                                                                                                                                                                                                                                                                                                                                                                                                                                                    |  |  |  |  |  |  |
|                    |                                                                                                                                                                                                                                                                                                                                                                                                                         |                                                                                                                                                                                                                                                                                                                                                                                                                                                                                                                                                    |  |  |  |  |  |  |
|                    |                                                                                                                                                                                                                                                                                                                                                                                                                         |                                                                                                                                                                                                                                                                                                                                                                                                                                                                                                                                                    |  |  |  |  |  |  |
|                    |                                                                                                                                                                                                                                                                                                                                                                                                                         |                                                                                                                                                                                                                                                                                                                                                                                                                                                                                                                                                    |  |  |  |  |  |  |
|                    |                                                                                                                                                                                                                                                                                                                                                                                                                         |                                                                                                                                                                                                                                                                                                                                                                                                                                                                                                                                                    |  |  |  |  |  |  |
|                    |                                                                                                                                                                                                                                                                                                                                                                                                                         |                                                                                                                                                                                                                                                                                                                                                                                                                                                                                                                                                    |  |  |  |  |  |  |
|                    |                                                                                                                                                                                                                                                                                                                                                                                                                         |                                                                                                                                                                                                                                                                                                                                                                                                                                                                                                                                                    |  |  |  |  |  |  |
|                    |                                                                                                                                                                                                                                                                                                                                                                                                                         |                                                                                                                                                                                                                                                                                                                                                                                                                                                                                                                                                    |  |  |  |  |  |  |
|                    |                                                                                                                                                                                                                                                                                                                                                                                                                         |                                                                                                                                                                                                                                                                                                                                                                                                                                                                                                                                                    |  |  |  |  |  |  |
|                    |                                                                                                                                                                                                                                                                                                                                                                                                                         |                                                                                                                                                                                                                                                                                                                                                                                                                                                                                                                                                    |  |  |  |  |  |  |
|                    |                                                                                                                                                                                                                                                                                                                                                                                                                         |                                                                                                                                                                                                                                                                                                                                                                                                                                                                                                                                                    |  |  |  |  |  |  |
|                    |                                                                                                                                                                                                                                                                                                                                                                                                                         |                                                                                                                                                                                                                                                                                                                                                                                                                                                                                                                                                    |  |  |  |  |  |  |
|                    |                                                                                                                                                                                                                                                                                                                                                                                                                         |                                                                                                                                                                                                                                                                                                                                                                                                                                                                                                                                                    |  |  |  |  |  |  |
|                    |                                                                                                                                                                                                                                                                                                                                                                                                                         |                                                                                                                                                                                                                                                                                                                                                                                                                                                                                                                                                    |  |  |  |  |  |  |
|                    |                                                                                                                                                                                                                                                                                                                                                                                                                         |                                                                                                                                                                                                                                                                                                                                                                                                                                                                                                                                                    |  |  |  |  |  |  |
|                    |                                                                                                                                                                                                                                                                                                                                                                                                                         |                                                                                                                                                                                                                                                                                                                                                                                                                                                                                                                                                    |  |  |  |  |  |  |
|                    |                                                                                                                                                                                                                                                                                                                                                                                                                         |                                                                                                                                                                                                                                                                                                                                                                                                                                                                                                                                                    |  |  |  |  |  |  |
|                    |                                                                                                                                                                                                                                                                                                                                                                                                                         |                                                                                                                                                                                                                                                                                                                                                                                                                                                                                                                                                    |  |  |  |  |  |  |
|                    |                                                                                                                                                                                                                                                                                                                                                                                                                         |                                                                                                                                                                                                                                                                                                                                                                                                                                                                                                                                                    |  |  |  |  |  |  |
|                    |                                                                                                                                                                                                                                                                                                                                                                                                                         |                                                                                                                                                                                                                                                                                                                                                                                                                                                                                                                                                    |  |  |  |  |  |  |
|                    |                                                                                                                                                                                                                                                                                                                                                                                                                         |                                                                                                                                                                                                                                                                                                                                                                                                                                                                                                                                                    |  |  |  |  |  |  |
|                    |                                                                                                                                                                                                                                                                                                                                                                                                                         |                                                                                                                                                                                                                                                                                                                                                                                                                                                                                                                                                    |  |  |  |  |  |  |
|                    |                                                                                                                                                                                                                                                                                                                                                                                                                         |                                                                                                                                                                                                                                                                                                                                                                                                                                                                                                                                                    |  |  |  |  |  |  |
|                    |                                                                                                                                                                                                                                                                                                                                                                                                                         |                                                                                                                                                                                                                                                                                                                                                                                                                                                                                                                                                    |  |  |  |  |  |  |
|                    |                                                                                                                                                                                                                                                                                                                                                                                                                         |                                                                                                                                                                                                                                                                                                                                                                                                                                                                                                                                                    |  |  |  |  |  |  |
|                    |                                                                                                                                                                                                                                                                                                                                                                                                                         |                                                                                                                                                                                                                                                                                                                                                                                                                                                                                                                                                    |  |  |  |  |  |  |
|                    |                                                                                                                                                                                                                                                                                                                                                                                                                         |                                                                                                                                                                                                                                                                                                                                                                                                                                                                                                                                                    |  |  |  |  |  |  |
|                    |                                                                                                                                                                                                                                                                                                                                                                                                                         |                                                                                                                                                                                                                                                                                                                                                                                                                                                                                                                                                    |  |  |  |  |  |  |
|                    |                                                                                                                                                                                                                                                                                                                                                                                                                         |                                                                                                                                                                                                                                                                                                                                                                                                                                                                                                                                                    |  |  |  |  |  |  |
|                    |                                                                                                                                                                                                                                                                                                                                                                                                                         |                                                                                                                                                                                                                                                                                                                                                                                                                                                                                                                                                    |  |  |  |  |  |  |
|                    |                                                                                                                                                                                                                                                                                                                                                                                                                         |                                                                                                                                                                                                                                                                                                                                                                                                                                                                                                                                                    |  |  |  |  |  |  |
|                    |                                                                                                                                                                                                                                                                                                                                                                                                                         |                                                                                                                                                                                                                                                                                                                                                                                                                                                                                                                                                    |  |  |  |  |  |  |
|                    |                                                                                                                                                                                                                                                                                                                                                                                                                         |                                                                                                                                                                                                                                                                                                                                                                                                                                                                                                                                                    |  |  |  |  |  |  |
|                    |                                                                                                                                                                                                                                                                                                                                                                                                                         |                                                                                                                                                                                                                                                                                                                                                                                                                                                                                                                                                    |  |  |  |  |  |  |
|                    |                                                                                                                                                                                                                                                                                                                                                                                                                         |                                                                                                                                                                                                                                                                                                                                                                                                                                                                                                                                                    |  |  |  |  |  |  |
|                    |                                                                                                                                                                                                                                                                                                                                                                                                                         |                                                                                                                                                                                                                                                                                                                                                                                                                                                                                                                                                    |  |  |  |  |  |  |
|                    |                                                                                                                                                                                                                                                                                                                                                                                                                         |                                                                                                                                                                                                                                                                                                                                                                                                                                                                                                                                                    |  |  |  |  |  |  |
|                    |                                                                                                                                                                                                                                                                                                                                                                                                                         |                                                                                                                                                                                                                                                                                                                                                                                                                                                                                                                                                    |  |  |  |  |  |  |
|                    |                                                                                                                                                                                                                                                                                                                                                                                                                         |                                                                                                                                                                                                                                                                                                                                                                                                                                                                                                                                                    |  |  |  |  |  |  |
|                    |                                                                                                                                                                                                                                                                                                                                                                                                                         |                                                                                                                                                                                                                                                                                                                                                                                                                                                                                                                                                    |  |  |  |  |  |  |
|                    |                                                                                                                                                                                                                                                                                                                                                                                                                         |                                                                                                                                                                                                                                                                                                                                                                                                                                                                                                                                                    |  |  |  |  |  |  |
|                    |                                                                                                                                                                                                                                                                                                                                                                                                                         |                                                                                                                                                                                                                                                                                                                                                                                                                                                                                                                                                    |  |  |  |  |  |  |
|                    |                                                                                                                                                                                                                                                                                                                                                                                                                         |                                                                                                                                                                                                                                                                                                                                                                                                                                                                                                                                                    |  |  |  |  |  |  |
|                    |                                                                                                                                                                                                                                                                                                                                                                                                                         |                                                                                                                                                                                                                                                                                                                                                                                                                                                                                                                                                    |  |  |  |  |  |  |
|                    |                                                                                                                                                                                                                                                                                                                                                                                                                         |                                                                                                                                                                                                                                                                                                                                                                                                                                                                                                                                                    |  |  |  |  |  |  |
|                    |                                                                                                                                                                                                                                                                                                                                                                                                                         |                                                                                                                                                                                                                                                                                                                                                                                                                                                                                                                                                    |  |  |  |  |  |  |
|                    |                                                                                                                                                                                                                                                                                                                                                                                                                         |                                                                                                                                                                                                                                                                                                                                                                                                                                                                                                                                                    |  |  |  |  |  |  |
|                    |                                                                                                                                                                                                                                                                                                                                                                                                                         |                                                                                                                                                                                                                                                                                                                                                                                                                                                                                                                                                    |  |  |  |  |  |  |
|                    |                                                                                                                                                                                                                                                                                                                                                                                                                         |                                                                                                                                                                                                                                                                                                                                                                                                                                                                                                                                                    |  |  |  |  |  |  |
|                    |                                                                                                                                                                                                                                                                                                                                                                                                                         |                                                                                                                                                                                                                                                                                                                                                                                                                                                                                                                                                    |  |  |  |  |  |  |
|                    |                                                                                                                                                                                                                                                                                                                                                                                                                         |                                                                                                                                                                                                                                                                                                                                                                                                                                                                                                                                                    |  |  |  |  |  |  |
|                    |                                                                                                                                                                                                                                                                                                                                                                                                                         |                                                                                                                                                                                                                                                                                                                                                                                                                                                                                                                                                    |  |  |  |  |  |  |
|                    |                                                                                                                                                                                                                                                                                                                                                                                                                         |                                                                                                                                                                                                                                                                                                                                                                                                                                                                                                                                                    |  |  |  |  |  |  |
|                    |                                                                                                                                                                                                                                                                                                                                                                                                                         |                                                                                                                                                                                                                                                                                                                                                                                                                                                                                                                                                    |  |  |  |  |  |  |
|                    |                                                                                                                                                                                                                                                                                                                                                                                                                         |                                                                                                                                                                                                                                                                                                                                                                                                                                                                                                                                                    |  |  |  |  |  |  |
|                    |                                                                                                                                                                                                                                                                                                                                                                                                                         |                                                                                                                                                                                                                                                                                                                                                                                                                                                                                                                                                    |  |  |  |  |  |  |
|                    |                                                                                                                                                                                                                                                                                                                                                                                                                         |                                                                                                                                                                                                                                                                                                                                                                                                                                                                                                                                                    |  |  |  |  |  |  |
|                    |                                                                                                                                                                                                                                                                                                                                                                                                                         |                                                                                                                                                                                                                                                                                                                                                                                                                                                                                                                                                    |  |  |  |  |  |  |
|                    |                                                                                                                                                                                                                                                                                                                                                                                                                         |                                                                                                                                                                                                                                                                                                                                                                                                                                                                                                                                                    |  |  |  |  |  |  |
|                    |                                                                                                                                                                                                                                                                                                                                                                                                                         |                                                                                                                                                                                                                                                                                                                                                                                                                                                                                                                                                    |  |  |  |  |  |  |
|                    |                                                                                                                                                                                                                                                                                                                                                                                                                         |                                                                                                                                                                                                                                                                                                                                                                                                                                                                                                                                                    |  |  |  |  |  |  |
|                    |                                                                                                                                                                                                                                                                                                                                                                                                                         |                                                                                                                                                                                                                                                                                                                                                                                                                                                                                                                                                    |  |  |  |  |  |  |
|                    |                                                                                                                                                                                                                                                                                                                                                                                                                         |                                                                                                                                                                                                                                                                                                                                                                                                                                                                                                                                                    |  |  |  |  |  |  |
|                    |                                                                                                                                                                                                                                                                                                                                                                                                                         |                                                                                                                                                                                                                                                                                                                                                                                                                                                                                                                                                    |  |  |  |  |  |  |
|                    |                                                                                                                                                                                                                                                                                                                                                                                                                         |                                                                                                                                                                                                                                                                                                                                                                                                                                                                                                                                                    |  |  |  |  |  |  |
|                    |                                                                                                                                                                                                                                                                                                                                                                                                                         |                                                                                                                                                                                                                                                                                                                                                                                                                                                                                                                                                    |  |  |  |  |  |  |
|                    |                                                                                                                                                                                                                                                                                                                                                                                                                         |                                                                                                                                                                                                                                                                                                                                                                                                                                                                                                                                                    |  |  |  |  |  |  |

|                                      |                                                                                                                                                                                                                                  |               |               |                                            |                               |  |
|--------------------------------------|----------------------------------------------------------------------------------------------------------------------------------------------------------------------------------------------------------------------------------|---------------|---------------|--------------------------------------------|-------------------------------|--|
| Any Adverse Effect                   | Study population                                                                                                                                                                                                                 |               | -             | 104<br>(1 RCT and 2 observational studies) | ⊕⊕○○<br>LOW <sup>b d</sup>    |  |
|                                      | 46/59<br>(78.0%)                                                                                                                                                                                                                 | 40/45 (88.9%) |               |                                            |                               |  |
| Serious Adverse Effect               | Study population                                                                                                                                                                                                                 |               | -             | 104<br>(1 RCT and 2 observational studies) | ⊕⊕○○<br>LOW <sup>b e</sup>    |  |
|                                      | 8/59 (13.6%)                                                                                                                                                                                                                     | 4/45 (8.9%)   |               |                                            |                               |  |
| Withdrawal owing to adverse effects  | Study population                                                                                                                                                                                                                 |               | -             | 124<br>(1 RCT and 3 observational studies) | ⊕⊕○○<br>LOW <sup>b f</sup>    |  |
|                                      | 15/79<br>(19.0%)                                                                                                                                                                                                                 | 0/45 (0.0%)   |               |                                            |                               |  |
| Quality of Life                      | Study used Quality of Life - Bronchiectasis - Nontuberculous Mycobacteria Module scores with no significant difference (p=0.204) between the inhaled antibiotic group (-7.9 [14.2], n=36) and placebo group (-2.8 [13.7], n=36). |               | -             | (1 RCT)                                    | ⊕⊕⊕○<br>MODERATE <sup>g</sup> |  |
| Development of Antibiotic Resistance | Study population                                                                                                                                                                                                                 |               | not estimable | 89<br>(1 RCT)                              | ⊕⊕⊕○<br>MODERATE <sup>g</sup> |  |
|                                      | 3/44 (6.8%)                                                                                                                                                                                                                      | 2/45 (4.4%)   |               |                                            |                               |  |

- a. Studies were case series without a control group
- b. Included 2 case series without a control group
- c. Conversion with inhaled antibiotics ranged from 30% to 80%
- d. Adverse effects ranged from 30% in case series to over 90% in RCT
- e. Ranged from 0% in case series to nearly 20% in RCT
- f. Ranged from 0% to 35% in inhaled group.
- g. Included both MAC and M abscessus

|                    |                                                                                                                                                                                                                                                                                                     |                                      |                                                                                                                                                                                                                                                                                                                                                                                                                                                                                                                                                                                   |
|--------------------|-----------------------------------------------------------------------------------------------------------------------------------------------------------------------------------------------------------------------------------------------------------------------------------------------------|--------------------------------------|-----------------------------------------------------------------------------------------------------------------------------------------------------------------------------------------------------------------------------------------------------------------------------------------------------------------------------------------------------------------------------------------------------------------------------------------------------------------------------------------------------------------------------------------------------------------------------------|
|                    |                                                                                                                                                                                                                                                                                                     |                                      |                                                                                                                                                                                                                                                                                                                                                                                                                                                                                                                                                                                   |
| RESOURCES REQUIRED | <p><b>How large are the resource requirements (costs)?</b></p> <ul style="list-style-type: none"> <li>○ Large costs</li> <li>● Moderate costs</li> <li>○ Negligible costs and savings</li> <li>○ Moderate savings</li> <li>○ Large savings</li> <br/> <li>○ Varies</li> <li>○ Don't know</li> </ul> | No research evidence was identified. | <p>The cost of parenteral amikacin (which would be used in the nebulizer) varies, but may cost the patient between \$150-400/ month depending on frequency and dosing.</p> <p>Some patients are able to obtain amikacin through insurance so for them out of pocket costs are low. For patients who must pay full price, it is an expensive intervention. The cost of amikacin liposomal inhaled suspension varies but in the United States is approximately \$300 a vial. As this is an FDA approved drug, insurance is likely to cover most of the costs for most patients.</p> |

|                    |                                                                                                                                                                                                                                                                                                                                                                                                                                 |                                                                                                                                                                                                                                                                                                                                                                                      |  |
|--------------------|---------------------------------------------------------------------------------------------------------------------------------------------------------------------------------------------------------------------------------------------------------------------------------------------------------------------------------------------------------------------------------------------------------------------------------|--------------------------------------------------------------------------------------------------------------------------------------------------------------------------------------------------------------------------------------------------------------------------------------------------------------------------------------------------------------------------------------|--|
| COST EFFECTIVENESS | <p><b>Does the cost-effectiveness of the intervention favor the intervention or the comparison?</b></p> <ul style="list-style-type: none"> <li>○ Favors the comparison</li> <li>○ Probably favors the comparison</li> <li>● Does not favor either the intervention or the comparison</li> <li>○ Probably favors the intervention</li> <li>○ Favors the intervention</li> <li>○ Varies</li> <li>○ No included studies</li> </ul> | No research evidence was identified.                                                                                                                                                                                                                                                                                                                                                 |  |
| EQUITY             | <p><b>What would be the impact on health equity?</b></p> <ul style="list-style-type: none"> <li>○ Reduced</li> <li>● Probably reduced</li> <li>○ Probably no impact</li> <li>○ Probably increased</li> <li>○ Increased</li> <li>○ Varies</li> <li>○ Don't know</li> </ul>                                                                                                                                                       | No research evidence was identified.                                                                                                                                                                                                                                                                                                                                                 |  |
| ACCEPTABILITY      | <p><b>Is the intervention acceptable to key stakeholders?</b></p> <ul style="list-style-type: none"> <li>○ No</li> <li>○ Probably no</li> <li>● Probably yes</li> <li>○ Yes</li> <li>○ Varies</li> <li>○ Don't know</li> </ul>                                                                                                                                                                                                  | No research evidence was identified.                                                                                                                                                                                                                                                                                                                                                 |  |
| FEASIBILITY        | <p><b>Is the intervention feasible to implement?</b></p> <ul style="list-style-type: none"> <li>○ No</li> <li>○ Probably no</li> <li>● Probably yes</li> <li>○ Yes</li> <li>○ Varies</li> <li>○ Don't know</li> </ul>                                                                                                                                                                                                           | A study by Adjemian, et al in 2014 evaluated treatment of <i>M. abscessus</i> and MAC, looking at compliance with the 2007 ATS/IDSA guidelines. This study found poor adherence with only 13% of antibiotic regimens compliant with guidelines. Of prescribed regimens for MAC, only 44% contained a macrolide, while 36% of regimens for <i>M. abscessus</i> contained a macrolide. |  |





## Summary of judgments

|                              | JUDGEMENT                            |                                                      |                                                                 |                                         |                         |        |                     | IMPLICATIONS |
|------------------------------|--------------------------------------|------------------------------------------------------|-----------------------------------------------------------------|-----------------------------------------|-------------------------|--------|---------------------|--------------|
| <b>DESIRABLE EFFECTS</b>     | Trivial                              | Small                                                | Moderate                                                        | Large                                   |                         | Varies | <b>Don't know</b>   |              |
| <b>UNDESIRABLE EFFECTS</b>   | Large                                | Moderate                                             | Small                                                           | Trivial                                 |                         | Varies | <b>Don't know</b>   |              |
| <b>CERTAINTY OF EVIDENCE</b> | <b>Very low</b>                      | Low                                                  | Moderate                                                        | High                                    |                         |        | No included studies |              |
| <b>VALUES</b>                | Important uncertainty or variability | <b>Possibly important uncertainty or variability</b> | Probably no important uncertainty or variability                | No important uncertainty or variability |                         |        |                     |              |
| <b>BALANCE OF EFFECTS</b>    | Favors the comparison                | Probably favors the comparison                       | <b>Does not favor either the intervention or the comparison</b> | Probably favors the intervention        | Favors the intervention | Varies | Don't know          |              |
| <b>RESOURCES REQUIRED</b>    | Large costs                          | <b>Moderate costs</b>                                | Negligible costs and savings                                    | Moderate savings                        | Large savings           | Varies | Don't know          |              |
| <b>COST EFFECTIVENESS</b>    | Favors the comparison                | Probably favors the comparison                       | <b>Does not favor either the intervention or the comparison</b> | Probably favors the intervention        | Favors the intervention | Varies | No included studies |              |
| <b>EQUITY</b>                | Reduced                              | <b>Probably reduced</b>                              | Probably no impact                                              | Probably increased                      | Increased               | Varies | Don't know          |              |
| <b>ACCEPTABILITY</b>         | No                                   | Probably no                                          | <b>Probably yes</b>                                             | Yes                                     |                         | Varies | Don't know          |              |

|             | JUDGEMENT |             |              |     |  |        |            | IMPLICATIONS |
|-------------|-----------|-------------|--------------|-----|--|--------|------------|--------------|
| FEASIBILITY | No        | Probably no | Probably yes | Yes |  | Varies | Don't know |              |

## Conclusions

**In patients with macrolide-susceptible MAC pulmonary disease, should a regimen with inhaled amikacin or a regimen without inhaled amikacin be used for treatment?**

| TYPE OF RECOMMENDATION | Strong recommendation against the intervention<br><br>○                                                                                                                                                                                                                                                                                                                                                                                                                                                                                                                                                                                                                                                                                                                                                                                              | Conditional recommendation against the intervention<br><br>○ | Conditional recommendation for either the intervention or the comparison<br><br>○ | Conditional recommendation for the intervention<br><br>● | Strong recommendation for the intervention<br><br>● |
|------------------------|------------------------------------------------------------------------------------------------------------------------------------------------------------------------------------------------------------------------------------------------------------------------------------------------------------------------------------------------------------------------------------------------------------------------------------------------------------------------------------------------------------------------------------------------------------------------------------------------------------------------------------------------------------------------------------------------------------------------------------------------------------------------------------------------------------------------------------------------------|--------------------------------------------------------------|-----------------------------------------------------------------------------------|----------------------------------------------------------|-----------------------------------------------------|
| RECOMMENDATION         | <p>In patients with MAC pulmonary disease, we suggest neither the use of commercially available parenteral amikacin nor amikacin liposomal inhaled suspension as part of the initial treatment regimen. (conditional recommendation, very low confidence in estimates of effect).</p> <p>The panel members voted for a conditional recommendation for the intervention.</p> <p>In patients with MAC pulmonary disease who have failed therapy after at least six months of guideline-based therapy, we recommend the use of amikacin liposomal inhaled suspension as part of the treatment regimen. (strong recommendation, moderate confidence in estimates of effect). (5 Strong, 4 Conditional, 9 Abstain)</p> <p>Expert panel members that had declared a conflict of interest with Insmad had to abstain from voting on whether a strong or</p> |                                                              |                                                                                   |                                                          |                                                     |

|                                      |                                                                                                                                                                                                                                                                                                                                                                                                                                                                                                                                                               |
|--------------------------------------|---------------------------------------------------------------------------------------------------------------------------------------------------------------------------------------------------------------------------------------------------------------------------------------------------------------------------------------------------------------------------------------------------------------------------------------------------------------------------------------------------------------------------------------------------------------|
|                                      | conditional recommendation was made. Among the voting members, 5 of 9 voted for a strong recommendation for the intervention.                                                                                                                                                                                                                                                                                                                                                                                                                                 |
| <b>JUSTIFICATION</b>                 | <p>There are no good data to support the use of inhaled antibiotics as an initial treatment option. There may be a risk of developing acquired mutational amikacin resistance with either inadequate companion medications or poor and irregular antibiotic deposition in the lung with areas of low amikacin concentration.</p> <p>Given the high morbidity and mortality in patients who fail treatment with an initial regimen, it is reasonable to consider inhaled therapy as part of a salvage regimen to aggressively treat MAC pulmonary disease.</p> |
| <b>SUBGROUP CONSIDERATIONS</b>       |                                                                                                                                                                                                                                                                                                                                                                                                                                                                                                                                                               |
| <b>IMPLEMENTATION CONSIDERATIONS</b> | Pretreatment with a bronchodilator.                                                                                                                                                                                                                                                                                                                                                                                                                                                                                                                           |
| <b>MONITORING AND EVALUATION</b>     |                                                                                                                                                                                                                                                                                                                                                                                                                                                                                                                                                               |
| <b>RESEARCH PRIORITIES</b>           | <p>Clinical trials evaluating safety and efficacy of inhaled amikacin (liposomal or non), comparing various dosing regimens to see which are most effective.</p> <p>Clinical trials to determine the optimal companion medications to inhaled amikacin in the treatment of MAC pulmonary infection.</p>                                                                                                                                                                                                                                                       |

# Table E4.7. Question VII

| In patients with macrolide susceptible MAC pulmonary disease, should a three-drug or a two-drug macrolide-containing regimen be used for treatment? |                                                                                                                                                                                           |
|-----------------------------------------------------------------------------------------------------------------------------------------------------|-------------------------------------------------------------------------------------------------------------------------------------------------------------------------------------------|
| POPULATION:                                                                                                                                         | treatment of MAC pulmonary infection                                                                                                                                                      |
| INTERVENTION:                                                                                                                                       | a three drug regimen                                                                                                                                                                      |
| COMPARISON:                                                                                                                                         | a two drug regimen                                                                                                                                                                        |
| MAIN OUTCOMES:                                                                                                                                      | Culture Conversion; Serious Adverse Effects; Withdrawal owing to adverse effect; Quality of Life; Cure of NTM Disease; Death; Development of antibiotic resistance; Recurrence (relapse); |

## Assessment

|                   | JUDGEMENT                                                                                                                                          | RESEARCH EVIDENCE                                                                                   |                                               |                 |                    |                         | ADDITIONAL CONSIDERATIONS |
|-------------------|----------------------------------------------------------------------------------------------------------------------------------------------------|-----------------------------------------------------------------------------------------------------|-----------------------------------------------|-----------------|--------------------|-------------------------|---------------------------|
| DESIRABLE EFFECTS | <b>How substantial are the desirable anticipated effects?</b><br><br>○ Trivial<br>● Small<br>○ Moderate<br>○ Large<br><br>○ Varies<br>○ Don't know |                                                                                                     |                                               |                 |                    |                         |                           |
|                   |                                                                                                                                                    | <b>A three drug regimen compared to a two drug regimen for treatment of MAC pulmonary infection</b> |                                               |                 |                    |                         |                           |
|                   |                                                                                                                                                    | Outcomes                                                                                            | <b>Anticipated absolute effects* (95% CI)</b> | Relative effect | Nº of participants | Quality of the evidence |                           |

|                                     |                                                                                                                                                                                                                           |                                                                                                                                                                                                  |                                     |                                       |                                  |                |                                                                                                                  |                               |                     |                                   |  |
|-------------------------------------|---------------------------------------------------------------------------------------------------------------------------------------------------------------------------------------------------------------------------|--------------------------------------------------------------------------------------------------------------------------------------------------------------------------------------------------|-------------------------------------|---------------------------------------|----------------------------------|----------------|------------------------------------------------------------------------------------------------------------------|-------------------------------|---------------------|-----------------------------------|--|
| UNDESIRABLE EFFECTS                 | <p><b>How substantial are the undesirable anticipated effects?</b></p> <ul style="list-style-type: none"><li>○ Large</li><li>○ Moderate</li><li>○ Small</li><li>● Trivial</li><li>○ Varies</li><li>○ Don't know</li></ul> |                                                                                                                                                                                                  |                                     |                                       |                                  |                | In non-pulmonary disease, there is known to be high rates of antibiotic resistance with 2 drug therapy regimens. |                               |                     |                                   |  |
|                                     |                                                                                                                                                                                                                           |                                                                                                                                                                                                  | <b>Risk with a two drug regimen</b> | <b>Risk with a three drug regimen</b> | (95% CI)                         | (studies)      |                                                                                                                  | (GRADE)                       |                     |                                   |  |
|                                     |                                                                                                                                                                                                                           | Culture Conversion                                                                                                                                                                               | 550 per 1000                        | <b>407 per 1000</b><br>(275 to 600)   | <b>RR 0.74</b><br>(0.50 to 1.09) | 119<br>(1 RCT) |                                                                                                                  | ⊕⊕○○<br>LOW <sup>1,2</sup>    |                     |                                   |  |
|                                     |                                                                                                                                                                                                                           | Serious Adverse Effects                                                                                                                                                                          | 0 per 1000                          | <b>0 per 1000</b><br>(0 to 0)         | not estimable                    | 119<br>(1 RCT) |                                                                                                                  | ⊕⊕⊕○<br>MODERATE <sup>1</sup> |                     |                                   |  |
|                                     |                                                                                                                                                                                                                           | Withdrawal owing to adverse effect                                                                                                                                                               | 267 per 1000                        | <b>373 per 1000</b><br>(213 to 565)   | <b>RR 1.40</b><br>(0.80 to 2.12) | 119<br>(1 RCT) |                                                                                                                  | - <sup>1,2</sup>              |                     |                                   |  |
|                                     |                                                                                                                                                                                                                           | Quality of Life - not measured                                                                                                                                                                   | -                                   | -                                     | -                                | -              |                                                                                                                  | -                             |                     |                                   |  |
|                                     |                                                                                                                                                                                                                           | Cure of NTM Disease - not measured                                                                                                                                                               | -                                   | -                                     | -                                | -              |                                                                                                                  | -                             |                     |                                   |  |
|                                     |                                                                                                                                                                                                                           | Death - not reported                                                                                                                                                                             | -                                   | -                                     | -                                | -              |                                                                                                                  | -                             |                     |                                   |  |
|                                     |                                                                                                                                                                                                                           | Development of antibiotic resistance - not reported                                                                                                                                              | -                                   | -                                     | -                                | -              |                                                                                                                  | -                             |                     |                                   |  |
| Recurrence (relapse) - not measured | -                                                                                                                                                                                                                         | -                                                                                                                                                                                                | -                                   | -                                     | -                                |                |                                                                                                                  |                               |                     |                                   |  |
| CERTAINTY OF EVIDENCE               | <p><b>What is the overall certainty of the evidence of effects?</b></p> <ul style="list-style-type: none"><li>○ Very low</li><li>● Low</li><li>○ Moderate</li><li>○ High</li><li>○ No included studies</li></ul>          | <p><b>The relative importance or values of the main outcomes of interest:</b></p> <table><tr><td>Outcome</td><td>Relative importance</td><td>Certainty of the evidence (GRADE)</td></tr></table> |                                     |                                       |                                  |                |                                                                                                                  | Outcome                       | Relative importance | Certainty of the evidence (GRADE) |  |
|                                     |                                                                                                                                                                                                                           | Outcome                                                                                                                                                                                          | Relative importance                 | Certainty of the evidence (GRADE)     |                                  |                |                                                                                                                  |                               |                     |                                   |  |

|        |                                                                                                                                                                                                                                                                                                                                                                                |                                                                                                                                                                                                                                                                                                                                                                                                                                                                                                                                                                                                                                                                                                                                                                                                                                                                                                                                                                                                                                                                                                                                                                                 |          |                  |  |
|--------|--------------------------------------------------------------------------------------------------------------------------------------------------------------------------------------------------------------------------------------------------------------------------------------------------------------------------------------------------------------------------------|---------------------------------------------------------------------------------------------------------------------------------------------------------------------------------------------------------------------------------------------------------------------------------------------------------------------------------------------------------------------------------------------------------------------------------------------------------------------------------------------------------------------------------------------------------------------------------------------------------------------------------------------------------------------------------------------------------------------------------------------------------------------------------------------------------------------------------------------------------------------------------------------------------------------------------------------------------------------------------------------------------------------------------------------------------------------------------------------------------------------------------------------------------------------------------|----------|------------------|--|
|        |                                                                                                                                                                                                                                                                                                                                                                                | Culture Conversion                                                                                                                                                                                                                                                                                                                                                                                                                                                                                                                                                                                                                                                                                                                                                                                                                                                                                                                                                                                                                                                                                                                                                              | CRITICAL | ⊕⊕○○<br>LOW      |  |
|        |                                                                                                                                                                                                                                                                                                                                                                                | Serious Adverse Effects                                                                                                                                                                                                                                                                                                                                                                                                                                                                                                                                                                                                                                                                                                                                                                                                                                                                                                                                                                                                                                                                                                                                                         | CRITICAL | ⊕⊕⊕○<br>MODERATE |  |
|        |                                                                                                                                                                                                                                                                                                                                                                                | Withdrawal owing to adverse effect                                                                                                                                                                                                                                                                                                                                                                                                                                                                                                                                                                                                                                                                                                                                                                                                                                                                                                                                                                                                                                                                                                                                              | CRITICAL | -                |  |
|        |                                                                                                                                                                                                                                                                                                                                                                                | Quality of Life                                                                                                                                                                                                                                                                                                                                                                                                                                                                                                                                                                                                                                                                                                                                                                                                                                                                                                                                                                                                                                                                                                                                                                 | CRITICAL | -                |  |
|        |                                                                                                                                                                                                                                                                                                                                                                                | Cure of NTM Disease                                                                                                                                                                                                                                                                                                                                                                                                                                                                                                                                                                                                                                                                                                                                                                                                                                                                                                                                                                                                                                                                                                                                                             | CRITICAL | -                |  |
|        |                                                                                                                                                                                                                                                                                                                                                                                | Death                                                                                                                                                                                                                                                                                                                                                                                                                                                                                                                                                                                                                                                                                                                                                                                                                                                                                                                                                                                                                                                                                                                                                                           | CRITICAL | -                |  |
|        |                                                                                                                                                                                                                                                                                                                                                                                | Development of antibiotic resistance                                                                                                                                                                                                                                                                                                                                                                                                                                                                                                                                                                                                                                                                                                                                                                                                                                                                                                                                                                                                                                                                                                                                            | CRITICAL | -                |  |
|        |                                                                                                                                                                                                                                                                                                                                                                                | Recurrence (relapse)                                                                                                                                                                                                                                                                                                                                                                                                                                                                                                                                                                                                                                                                                                                                                                                                                                                                                                                                                                                                                                                                                                                                                            | CRITICAL | -                |  |
| VALUES | <p><b>Is there important uncertainty about or variability in how much people value the main outcomes?</b></p> <ul style="list-style-type: none"> <li>○ Important uncertainty or variability</li> <li>● Possibly important uncertainty or variability</li> <li>○ Probably no important uncertainty or variability</li> <li>○ No important uncertainty or variability</li> </ul> | <p>Values and preferences:</p> <p>Three relevant studies were identified that provide data on patient values and preferences:</p> <p>Mehta and Marras, 2011 evaluated the impact of pulmonary NTM on health-related quality of life. In this study, patients with pulmonary NTM had significantly impaired health-related quality of life with two QOL measures significantly lower than historical normal controls. Multivariable analysis showed an association between QOL scores and lung function</p> <p>Hong, et al, 2014 also evaluated the impact of pulmonary NTM on health-related quality of life. This was a direct comparison between patients with NTM disease and healthy subjects and found patients with NTM reported more health status issues and anxiety/depression issues than healthy controls. Lung function was also independently associated with QOL scores.</p> <p>Czaja, et al 2015 evaluated change in quality of life in response to various treatment regimens for <i>M. abscessus</i> (many patients had coinfection with MAC or <i>Pseudomonas</i>). Mean QOL score was significantly improved after treatment at 3, 6, 12, and 24 months.</p> |          |                  |  |

**Does the balance between desirable and undesirable effects favor the intervention or the comparison?**

- Favors the comparison
- Probably favors the comparison
- Does not favor either the intervention or the comparison
- Probably favors the intervention
- Favors the intervention
  
- Varies
- Don't know

**A three drug regimen compared to a two drug regimen for treatment of MAC pulmonary infection**

| Outcomes                                            | Anticipated absolute effects* (95% CI) |                                     | Relative effect (95% CI)         | Nº of participants (studies) | Quality of the evidence (GRADE) |
|-----------------------------------------------------|----------------------------------------|-------------------------------------|----------------------------------|------------------------------|---------------------------------|
|                                                     | Risk with a two drug regimen           | Risk with a three drug regimen      |                                  |                              |                                 |
| Culture Conversion                                  | 550 per 1000                           | <b>407 per 1000</b><br>(275 to 600) | <b>RR 0.74</b><br>(0.50 to 1.09) | 119<br>(1 RCT)               | ⊕⊕○○<br>LOW <sup>1,2</sup>      |
| Serious Adverse Effects                             | 0 per 1000                             | <b>0 per 1000</b><br>(0 to 0)       | not estimable                    | 119<br>(1 RCT)               | ⊕⊕⊕○<br>MODERATE <sup>1</sup>   |
| Withdrawal owing to adverse effect                  | 267 per 1000                           | <b>373 per 1000</b><br>(213 to 565) | <b>RR 1.40</b><br>(0.80 to 2.12) | 119<br>(1 RCT)               | - <sup>1,2</sup>                |
| Quality of Life - not measured                      | -                                      | -                                   | -                                | -                            | -                               |
| Cure of NTM Disease - not measured                  | -                                      | -                                   | -                                | -                            | -                               |
| Death - not reported                                | -                                      | -                                   | -                                | -                            | -                               |
| Development of antibiotic resistance - not reported | -                                      | -                                   | -                                | -                            | -                               |
| Recurrence (relapse) - not measured                 | -                                      | -                                   | -                                | -                            | -                               |

|                    |                                                                                                                                                                                                                                                                                                                                                                                                                                 |                                      |  |
|--------------------|---------------------------------------------------------------------------------------------------------------------------------------------------------------------------------------------------------------------------------------------------------------------------------------------------------------------------------------------------------------------------------------------------------------------------------|--------------------------------------|--|
| RESOURCES REQUIRED | <p><b>How large are the resource requirements (costs)?</b></p> <ul style="list-style-type: none"> <li>○ Large costs</li> <li>○ Moderate costs</li> <li>● Negligible costs and savings</li> <li>○ Moderate savings</li> <li>○ Large savings</li> <li>○ Varies</li> <li>○ Don't know</li> </ul>                                                                                                                                   | No research evidence was identified. |  |
| COST EFFECTIVENESS | <p><b>Does the cost-effectiveness of the intervention favor the intervention or the comparison?</b></p> <ul style="list-style-type: none"> <li>○ Favors the comparison</li> <li>○ Probably favors the comparison</li> <li>● Does not favor either the intervention or the comparison</li> <li>○ Probably favors the intervention</li> <li>○ Favors the intervention</li> <li>○ Varies</li> <li>○ No included studies</li> </ul> | No research evidence was identified. |  |
| EQUITY             | <p><b>What would be the impact on health equity?</b></p> <ul style="list-style-type: none"> <li>○ Reduced</li> <li>○ Probably reduced</li> <li>● Probably no impact</li> <li>○ Probably increased</li> <li>○ Increased</li> <li>○ Varies</li> <li>○ Don't know</li> </ul>                                                                                                                                                       | No research evidence was identified. |  |



|               |                                                                                                                                                                                                                         |                                                                                                                                                                                                                                                                                                                                                                      |  |
|---------------|-------------------------------------------------------------------------------------------------------------------------------------------------------------------------------------------------------------------------|----------------------------------------------------------------------------------------------------------------------------------------------------------------------------------------------------------------------------------------------------------------------------------------------------------------------------------------------------------------------|--|
| ACCEPTABILITY | <b>Is the intervention acceptable to key stakeholders?</b> <ul style="list-style-type: none"> <li>○ No</li> <li>○ Probably no</li> <li>● Probably yes</li> <li>○ Yes</li> <li>○ Varies</li> <li>○ Don't know</li> </ul> | No research evidence was identified.                                                                                                                                                                                                                                                                                                                                 |  |
| FEASIBILITY   | <b>Is the intervention feasible to implement?</b> <ul style="list-style-type: none"> <li>○ No</li> <li>○ Probably no</li> <li>● Probably yes</li> <li>○ Yes</li> <li>○ Varies</li> <li>○ Don't know</li> </ul>          | A study by Adjemian, et al in 2014 evaluated treatment of M abscessus and MAC, looking at compliance with the 2007 ATS/IDSA guidelines. This study found poor adherence with only 13% of antibiotic regimens compliant with guidelines. Of prescribed regimens for MAC, only 44% contained a macrolide, while 36% of regimens for M abscessus contained a macrolide. |  |

## Summary of judgments

|                     | JUDGEMENT |          |          |         |  |        |            | IMPLICATIONS |
|---------------------|-----------|----------|----------|---------|--|--------|------------|--------------|
| DESIRABLE EFFECTS   | Trivial   | Small    | Moderate | Large   |  | Varies | Don't know |              |
| UNDESIRABLE EFFECTS | Large     | Moderate | Small    | Trivial |  | Varies | Don't know |              |

|                              | JUDGEMENT                            |                                                      |                                                                 |                                         |                         |        |                     | IMPLICATIONS |
|------------------------------|--------------------------------------|------------------------------------------------------|-----------------------------------------------------------------|-----------------------------------------|-------------------------|--------|---------------------|--------------|
| <b>CERTAINTY OF EVIDENCE</b> | Very low                             | <b>Low</b>                                           | Moderate                                                        | High                                    |                         |        | No included studies |              |
| <b>VALUES</b>                | Important uncertainty or variability | <b>Possibly important uncertainty or variability</b> | Probably no important uncertainty or variability                | No important uncertainty or variability |                         |        |                     |              |
| <b>BALANCE OF EFFECTS</b>    | Favors the comparison                | Probably favors the comparison                       | <b>Does not favor either the intervention or the comparison</b> | Probably favors the intervention        | Favors the intervention | Varies | Don't know          |              |
| <b>RESOURCES REQUIRED</b>    | Large costs                          | Moderate costs                                       | <b>Negligible costs and savings</b>                             | Moderate savings                        | Large savings           | Varies | Don't know          |              |
| <b>COST EFFECTIVENESS</b>    | Favors the comparison                | Probably favors the comparison                       | <b>Does not favor either the intervention or the comparison</b> | Probably favors the intervention        | Favors the intervention | Varies | No included studies |              |
| <b>EQUITY</b>                | Reduced                              | Probably reduced                                     | <b>Probably no impact</b>                                       | Probably increased                      | Increased               | Varies | Don't know          |              |
| <b>ACCEPTABILITY</b>         | No                                   | Probably no                                          | <b>Probably yes</b>                                             | Yes                                     |                         | Varies | Don't know          |              |
| <b>FEASIBILITY</b>           | No                                   | Probably no                                          | <b>Probably yes</b>                                             | Yes                                     |                         | Varies | Don't know          |              |

## Conclusions

**In patients with macrolide susceptible MAC pulmonary disease, should a three-drug or a two-drug macrolide-containing regimen be used for treatment?**

| TYPE OF RECOMMENDATION               | Strong recommendation against the intervention<br><br>○                                                                                                                                                                                                                                                                                                                                                            | Conditional recommendation against the intervention<br><br>○ | Conditional recommendation for either the intervention or the comparison<br><br>○ | Conditional recommendation for the intervention<br><br>● | Strong recommendation for the intervention<br><br>○ |
|--------------------------------------|--------------------------------------------------------------------------------------------------------------------------------------------------------------------------------------------------------------------------------------------------------------------------------------------------------------------------------------------------------------------------------------------------------------------|--------------------------------------------------------------|-----------------------------------------------------------------------------------|----------------------------------------------------------|-----------------------------------------------------|
| <b>RECOMMENDATION</b>                | <p>In patients with macrolide susceptible MAC pulmonary disease, we suggest a treatment regimen with at least three drugs (including a macrolide and ethambutol) over a regimen with two drugs (a macrolide and ethambutol alone). (conditional recommendation, very low confidence in estimates of effect).</p> <p>The panel members voted unanimously for a conditional recommendation for the intervention.</p> |                                                              |                                                                                   |                                                          |                                                     |
| <b>JUSTIFICATION</b>                 |                                                                                                                                                                                                                                                                                                                                                                                                                    |                                                              |                                                                                   |                                                          |                                                     |
| <b>SUBGROUP CONSIDERATIONS</b>       | In patients with severe, particularly fibrocavitary disease, addition of amikacin or streptomycin (possible with clofazimine) in the initial 3 months of treatment is worth serious consideration.                                                                                                                                                                                                                 |                                                              |                                                                                   |                                                          |                                                     |
| <b>IMPLEMENTATION CONSIDERATIONS</b> |                                                                                                                                                                                                                                                                                                                                                                                                                    |                                                              |                                                                                   |                                                          |                                                     |
| <b>MONITORING AND EVALUATION</b>     | Renal function, audiometry, EKG                                                                                                                                                                                                                                                                                                                                                                                    |                                                              |                                                                                   |                                                          |                                                     |
| <b>RESEARCH PRIORITIES</b>           |                                                                                                                                                                                                                                                                                                                                                                                                                    |                                                              |                                                                                   |                                                          |                                                     |

## Table E4.8. Question VIII

In patients with macrolide susceptible MAC pulmonary disease, should a daily or an intermittent macrolide-based regimen be used for treatment?

|                       |                                                                                                                                                                                                                               |
|-----------------------|-------------------------------------------------------------------------------------------------------------------------------------------------------------------------------------------------------------------------------|
| <b>POPULATION:</b>    | patients with pulmonary MAC                                                                                                                                                                                                   |
| <b>INTERVENTION:</b>  | a three times per week macrolide-based regimen                                                                                                                                                                                |
| <b>COMPARISON:</b>    | daily macrolide-based regimen                                                                                                                                                                                                 |
| <b>MAIN OUTCOMES:</b> | Death; Quality of life; Cure of NTM Disease; Culture Conversion; Recurrence; Development of Antibiotic Resistance; Serious adverse effects; Discontinuation of the initial treatment due to adverse effects; Adverse Effects; |

## Assessment

|                   | JUDGEMENT                                                                                                                                                                                                               | RESEARCH EVIDENCE                                                                                                              |                                         |                                                          |                          |                              | ADDITIONAL CONSIDERATIONS                                                                                                                                                                                                                                                                                                                              |
|-------------------|-------------------------------------------------------------------------------------------------------------------------------------------------------------------------------------------------------------------------|--------------------------------------------------------------------------------------------------------------------------------|-----------------------------------------|----------------------------------------------------------|--------------------------|------------------------------|--------------------------------------------------------------------------------------------------------------------------------------------------------------------------------------------------------------------------------------------------------------------------------------------------------------------------------------------------------|
| DESTRABLE EFFECTS | <b>How substantial are the desirable anticipated effects?</b> <ul style="list-style-type: none"> <li>○ Trivial</li> <li>● Small</li> <li>○ Moderate</li> <li>○ Large</li> <li>○ Varies</li> <li>○ Don't know</li> </ul> | <b>A three times per week macrolide-based regimen compared to daily macrolide-based regimen in patients with pulmonary MAC</b> |                                         |                                                          |                          |                              | <p>In one study 75% had to discontinue daily treatment owing to adverse events.</p> <p>Panel members have seen many more patients in their practice than there were in these combined studies.</p> <p>In the experience of some panel members the proportion of patients not tolerating daily treatment may be smaller than seen in these studies.</p> |
|                   |                                                                                                                                                                                                                         | Outcomes                                                                                                                       | Anticipated absolute effects* (95% CI)  |                                                          | Relative effect (95% CI) | Nº of participants (studies) | Quality of the evidence (GRADE)                                                                                                                                                                                                                                                                                                                        |
|                   |                                                                                                                                                                                                                         |                                                                                                                                | Risk with daily macrolide-based regimen | Risk with a three times per week macrolide-based regimen |                          |                              |                                                                                                                                                                                                                                                                                                                                                        |
|                   |                                                                                                                                                                                                                         | Death - not reported                                                                                                           | -                                       | -                                                        | -                        | -                            | -                                                                                                                                                                                                                                                                                                                                                      |
|                   |                                                                                                                                                                                                                         | Quality of life - not                                                                                                          | -                                       | -                                                        | -                        | -                            | -                                                                                                                                                                                                                                                                                                                                                      |

|                     |                                                                                                                                                      |                                                                                                                                                                                 |            |                                 |                                   |                                  |                                                                        |                                                                                                               |
|---------------------|------------------------------------------------------------------------------------------------------------------------------------------------------|---------------------------------------------------------------------------------------------------------------------------------------------------------------------------------|------------|---------------------------------|-----------------------------------|----------------------------------|------------------------------------------------------------------------|---------------------------------------------------------------------------------------------------------------|
|                     |                                                                                                                                                      | measured                                                                                                                                                                        |            |                                 |                                   |                                  | This applies to nodular or bronchiectatic disease and not to cavitory. |                                                                                                               |
|                     |                                                                                                                                                      | Cure of NTM Disease<br>follow up: 12 months                                                                                                                                     | 76 per 100 | <b>73 per 100</b><br>(55 to 86) | <b>RR 0.97</b><br>(0.72 to 1.14)  | 217<br>(1 observational study)   |                                                                        | ⊕○○○<br>VERY LOW <sup>1,2</sup>                                                                               |
| UNDESIRABLE EFFECTS | <b>How substantial are the undesirable anticipated effects?</b><br><br>○ Large<br>○ Moderate<br>○ Small<br>● Trivial<br><br>○ Varies<br>○ Don't know | Culture Conversion<br>follow up: range 6 to 12 months                                                                                                                           | 74 per 100 | <b>76 per 100</b><br>(69 to 84) | <b>RR 1.03</b><br>(0.93 to 1.14)  | 597<br>(5 observational studies) | ⊕○○○<br>VERY LOW <sup>1,4</sup>                                        | There is some concern about potentially increased recurrence, however, this has been based on 4 events total. |
|                     |                                                                                                                                                      | Recurrence assessed with:<br>microbiological recurrence of two or more positive cultures after an initial negative conversion during antibiotic therapy<br>follow up: 12 months | 1 per 100  | <b>4 per 100</b><br>(0 to 34)   | <b>RR 2.78</b><br>(0.30 to 26.16) | 158<br>(1 observational study)   | ⊕○○○<br>VERY LOW <sup>1,2,5</sup>                                      |                                                                                                               |
|                     |                                                                                                                                                      | Development of Antibiotic Resistance<br>follow up: range 6 to 12 months                                                                                                         | 12 per 100 | <b>3 per 100</b><br>(1 to 9)    | <b>RR 0.23</b><br>(0.07 to 0.74)  | 232<br>(4 observational studies) | ⊕○○○<br>VERY LOW <sup>1,4,6</sup>                                      |                                                                                                               |
|                     |                                                                                                                                                      | Serious adverse effects - not reported                                                                                                                                          | -          | -                               | -                                 | -                                | -                                                                      |                                                                                                               |
|                     |                                                                                                                                                      | Discontinuation of the initial treatment due to adverse effects<br>follow up: range 6 to 12 months                                                                              | 22 per 100 | <b>10 per 100</b><br>(2 to 48)  | <b>RR 0.44</b><br>(0.09 to 2.16)  | 564<br>(4 observational studies) | ⊕○○○<br>VERY LOW <sup>1,7,8</sup>                                      |                                                                                                               |
|                     |                                                                                                                                                      | Adverse Effects<br>follow up: range 6 to 12 months                                                                                                                              | 39 per 100 | <b>24 per 100</b><br>(10 to 60) | <b>RR 0.63</b><br>(0.25 to 1.55)  | 445<br>(4 observational studies) | ⊕○○○<br>VERY LOW <sup>1,8</sup>                                        |                                                                                                               |
|                     |                                                                                                                                                      |                                                                                                                                                                                 |            |                                 |                                   |                                  |                                                                        |                                                                                                               |

**What is the overall certainty of the evidence of effects?**

- Very low
- Low
- Moderate
- High
- No included studies

**The relative importance or values of the main outcomes of interest:**

| Outcome                              | Relative importance | Certainty of the evidence (GRADE) |
|--------------------------------------|---------------------|-----------------------------------|
| Death                                | CRITICAL            | -                                 |
| Quality of life                      | CRITICAL            | -                                 |
| Cure of NTM Disease                  | CRITICAL            | ⊕○○○<br>VERY LOW                  |
| Culture Conversion                   | CRITICAL            | ⊕○○○<br>VERY LOW                  |
| Recurrence                           | CRITICAL            | ⊕○○○<br>VERY LOW                  |
| Development of Antibiotic Resistance | CRITICAL            | ⊕○○○<br>VERY LOW                  |
| Serious adverse effects              | CRITICAL            | -                                 |

|        |                                                                                                                                                                                                                                                                                                                                                                                |                                                                                                                                                                                                                                                                                                                                                                                                                                                                                                                                                                                                                               |  |
|--------|--------------------------------------------------------------------------------------------------------------------------------------------------------------------------------------------------------------------------------------------------------------------------------------------------------------------------------------------------------------------------------|-------------------------------------------------------------------------------------------------------------------------------------------------------------------------------------------------------------------------------------------------------------------------------------------------------------------------------------------------------------------------------------------------------------------------------------------------------------------------------------------------------------------------------------------------------------------------------------------------------------------------------|--|
|        |                                                                                                                                                                                                                                                                                                                                                                                |                                                                                                                                                                                                                                                                                                                                                                                                                                                                                                                                                                                                                               |  |
| VALUES | <p><b>Is there important uncertainty about or variability in how much people value the main outcomes?</b></p> <ul style="list-style-type: none"> <li>○ Important uncertainty or variability</li> <li>○ Possibly important uncertainty or variability</li> <li>○ Probably no important uncertainty or variability</li> <li>● No important uncertainty or variability</li> </ul> | <p>We identified 1 study including 51 mainly middle-aged to older women in Canada (mean age 67y, MAC and M. abscessus) that measured QoL (Mehta and Marras. Respiratory Medicine 2011,105:1718-1725).</p> <p>Mean SF-36 scores (scale 0-100, higher scores indicate better QoL; MID~5-10 points) were consistently much lower compared to population normal:</p> <p>Physical Functioning (58 vs. 86; Δ28)</p> <p>Role Physical (54 vs. 82; Δ28)</p> <p>Bodily Pain (63 vs. 76; Δ13)</p> <p>General Health Perceptions (41 vs. 77; Δ36)</p> <p>Energy/Vitality (49 vs. 66; Δ17)</p> <p>Social Functioning (63 vs. 86; Δ23)</p> |  |

|                    |                                                                                                                                                                                                                                                                                                                                                                                                                                   |                                                                                                                                                                                                                                                                                                                                                                                                                                                                                                                                                       |                                                                                                                                                                                                                                                                                                                                                                                                                                                                                        |
|--------------------|-----------------------------------------------------------------------------------------------------------------------------------------------------------------------------------------------------------------------------------------------------------------------------------------------------------------------------------------------------------------------------------------------------------------------------------|-------------------------------------------------------------------------------------------------------------------------------------------------------------------------------------------------------------------------------------------------------------------------------------------------------------------------------------------------------------------------------------------------------------------------------------------------------------------------------------------------------------------------------------------------------|----------------------------------------------------------------------------------------------------------------------------------------------------------------------------------------------------------------------------------------------------------------------------------------------------------------------------------------------------------------------------------------------------------------------------------------------------------------------------------------|
|                    |                                                                                                                                                                                                                                                                                                                                                                                                                                   | <p>Role Emotional (75 vs. 84; Δ10)</p> <p>Mental Health (69 vs. 76; Δ9)</p> <p>Mean SGRQ scores (scale 0-100, lower scores indicate better QoL; MID ~4-5 points based on COPD population) were lower compared to population normal consistently across all domains. Mean difference in total SGRQ in NTM patients compared to normal population was 31 points lower (39 vs. 8 points lower).</p> <p>We found no other study in the population of interest that would evaluate patient attitudes towards other outcomes or treatments of interest.</p> |                                                                                                                                                                                                                                                                                                                                                                                                                                                                                        |
| BALANCE OF EFFECTS | <p><b>Does the balance between desirable and undesirable effects favor the intervention or the comparison?</b></p> <ul style="list-style-type: none"> <li>○ Favors the comparison</li> <li>○ Probably favors the comparison</li> <li>○ Does not favor either the intervention or the comparison</li> <li>● Probably favors the intervention</li> <li>○ Favors the intervention</li> <li>○ Varies</li> <li>○ Don't know</li> </ul> | No research evidence was identified.                                                                                                                                                                                                                                                                                                                                                                                                                                                                                                                  |                                                                                                                                                                                                                                                                                                                                                                                                                                                                                        |
| RESOURCES REQUIRED | <p><b>How large are the resource requirements (costs)?</b></p> <ul style="list-style-type: none"> <li>○ Large costs</li> <li>○ Moderate costs</li> <li>○ Negligible costs and savings</li> <li>● Moderate savings</li> <li>○ Large savings</li> <li>○ Varies</li> <li>○ Don't know</li> </ul>                                                                                                                                     | No research evidence was identified.                                                                                                                                                                                                                                                                                                                                                                                                                                                                                                                  | <p>Cost will depend on drug regimen but it will be lower with 3 times weekly compared to daily treatment because the total weekly dose of ethambutol and azithromycin will be higher. For example, for a 70 kg person, they will take 7 tablets of azithromycin a week versus 6 tablets with three times weekly dosing and 17.5 tables of ethambutol a week versus 13 given three times a week. The number of rifampin capsules will remain the same whether administered daily or</p> |



|                    |                                                                                                                                                                                                                                                                                                                                                                                                                          |                                      |                       |
|--------------------|--------------------------------------------------------------------------------------------------------------------------------------------------------------------------------------------------------------------------------------------------------------------------------------------------------------------------------------------------------------------------------------------------------------------------|--------------------------------------|-----------------------|
|                    |                                                                                                                                                                                                                                                                                                                                                                                                                          |                                      | three times a week.   |
| COST EFFECTIVENESS | <b>Does the cost-effectiveness of the intervention favor the intervention or the comparison?</b> <ul style="list-style-type: none"> <li>○ Favors the comparison</li> <li>○ Probably favors the comparison</li> <li>○ Does not favor either the intervention or the comparison</li> <li>○ Probably favors the intervention</li> <li>○ Favors the intervention</li> <li>○ Varies</li> <li>○ No included studies</li> </ul> | No research evidence was identified. |                       |
| EQUITY             | <b>What would be the impact on health equity?</b> <ul style="list-style-type: none"> <li>○ Reduced</li> <li>○ Probably reduced</li> <li>○ Probably no impact</li> <li>● Probably increased</li> <li>○ Increased</li> <li>○ Varies</li> <li>○ Don't know</li> </ul>                                                                                                                                                       | No research evidence was identified. | Except for cost - no. |

|               |                                                                                                                                                                                                                         |                                      |                                                                                                                                                             |
|---------------|-------------------------------------------------------------------------------------------------------------------------------------------------------------------------------------------------------------------------|--------------------------------------|-------------------------------------------------------------------------------------------------------------------------------------------------------------|
| ACCEPTABILITY | <b>Is the intervention acceptable to key stakeholders?</b> <ul style="list-style-type: none"> <li>○ No</li> <li>○ Probably no</li> <li>○ Probably yes</li> <li>○ Yes</li> <li>● Varies</li> <li>○ Don't know</li> </ul> | No research evidence was identified. | There may be lower or higher adherence with three times weekly regimen. Also clinicians may be less or more prone to prescribe three times weekly vs daily. |
| FEASIBILITY   | <b>Is the intervention feasible to implement?</b> <ul style="list-style-type: none"> <li>○ No</li> <li>○ Probably no</li> <li>○ Probably yes</li> <li>● Yes</li> <li>○ Varies</li> <li>○ Don't know</li> </ul>          | No research evidence was identified. |                                                                                                                                                             |

## Summary of judgments

|                       | JUDGEMENT                            |                                   |                                      |                                         |  |        |                     | IMPLICATIONS |
|-----------------------|--------------------------------------|-----------------------------------|--------------------------------------|-----------------------------------------|--|--------|---------------------|--------------|
| DESIRABLE EFFECTS     | Trivial                              | Small                             | Moderate                             | Large                                   |  | Varies | Don't know          |              |
| UNDESIRABLE EFFECTS   | Large                                | Moderate                          | Small                                | Trivial                                 |  | Varies | Don't know          |              |
| CERTAINTY OF EVIDENCE | Very low                             | Low                               | Moderate                             | High                                    |  |        | No included studies |              |
| VALUES                | Important uncertainty or variability | Possibly important uncertainty or | Probably no important uncertainty or | No important uncertainty or variability |  |        |                     |              |

|                           | JUDGEMENT             |                                |                                                          |                                         |                         |               |                     | IMPLICATIONS |
|---------------------------|-----------------------|--------------------------------|----------------------------------------------------------|-----------------------------------------|-------------------------|---------------|---------------------|--------------|
|                           |                       | variability                    | variability                                              |                                         |                         |               |                     |              |
| <b>BALANCE OF EFFECTS</b> | Favors the comparison | Probably favors the comparison | Does not favor either the intervention or the comparison | <b>Probably favors the intervention</b> | Favors the intervention | Varies        | Don't know          |              |
| <b>RESOURCES REQUIRED</b> | Large costs           | Moderate costs                 | Negligible costs and savings                             | <b>Moderate savings</b>                 | Large savings           | Varies        | Don't know          |              |
| <b>COST EFFECTIVENESS</b> | Favors the comparison | Probably favors the comparison | Does not favor either the intervention or the comparison | Probably favors the intervention        | Favors the intervention | Varies        | No included studies |              |
| <b>EQUITY</b>             | Reduced               | Probably reduced               | Probably no impact                                       | <b>Probably increased</b>               | Increased               | Varies        | Don't know          |              |
| <b>ACCEPTABILITY</b>      | No                    | Probably no                    | Probably yes                                             | Yes                                     |                         | <b>Varies</b> | Don't know          |              |
| <b>FEASIBILITY</b>        | No                    | Probably no                    | Probably yes                                             | <b>Yes</b>                              |                         | Varies        | Don't know          |              |

## Conclusions

**In patients with macrolide susceptible MAC pulmonary disease, should a daily or an intermittent macrolide-based regimen be used for treatment?**

| TYPE OF RECOMMENDATION | Strong recommendation | Conditional recommendation | Conditional recommendation | Conditional recommendation | Strong recommendation |
|------------------------|-----------------------|----------------------------|----------------------------|----------------------------|-----------------------|
|------------------------|-----------------------|----------------------------|----------------------------|----------------------------|-----------------------|

|                                      | against the<br>intervention                                                                                                                                                                                                                                                                                                                                                                                                                                                                                                                                                                                                                                                           | against the<br>intervention | for either the<br>intervention or<br>the comparison | for the<br>intervention | for the<br>intervention |
|--------------------------------------|---------------------------------------------------------------------------------------------------------------------------------------------------------------------------------------------------------------------------------------------------------------------------------------------------------------------------------------------------------------------------------------------------------------------------------------------------------------------------------------------------------------------------------------------------------------------------------------------------------------------------------------------------------------------------------------|-----------------------------|-----------------------------------------------------|-------------------------|-------------------------|
|                                      | ○                                                                                                                                                                                                                                                                                                                                                                                                                                                                                                                                                                                                                                                                                     | ○                           | ○                                                   | ●                       | ○                       |
| <b>RECOMMENDATION</b>                | <p>Recommendation 8a: In patients with nodular/bronchiectatic macrolide susceptible MAC pulmonary disease, we suggest a three times per week macrolide-based regimen rather than a daily macrolide-based regimen. (conditional recommendation, very low confidence in estimates of effect).</p> <p>Recommendation 8b. In patients with fibrocavitary macrolide susceptible MAC pulmonary disease we suggest a daily macrolide-based regimen rather than three times per week macrolide-based regimen. (conditional recommendation, very low confidence in estimates of effect).</p> <p>The panel members voted unanimously for a conditional recommendation for the intervention.</p> |                             |                                                     |                         |                         |
| <b>JUSTIFICATION</b>                 | <p>Recommendation to use three times weekly in non-cavitary is based on similar efficacy, fewer adverse reactions and lower costs.</p> <p>Recommendation to use daily administration in cavitary disease is based on a single study reporting very low culture conversion rates and the experience of the committee members given high risk of treatment failure and recurrence with cavitary disease.</p>                                                                                                                                                                                                                                                                            |                             |                                                     |                         |                         |
| <b>SUBGROUP CONSIDERATIONS</b>       |                                                                                                                                                                                                                                                                                                                                                                                                                                                                                                                                                                                                                                                                                       |                             |                                                     |                         |                         |
| <b>IMPLEMENTATION CONSIDERATIONS</b> |                                                                                                                                                                                                                                                                                                                                                                                                                                                                                                                                                                                                                                                                                       |                             |                                                     |                         |                         |
| <b>MONITORING AND EVALUATION</b>     |                                                                                                                                                                                                                                                                                                                                                                                                                                                                                                                                                                                                                                                                                       |                             |                                                     |                         |                         |
| <b>RESEARCH PRIORITIES</b>           | Is there a differences in response based on MAC species?                                                                                                                                                                                                                                                                                                                                                                                                                                                                                                                                                                                                                              |                             |                                                     |                         |                         |

# Table E4.9. Question IX

|                                                                                                                                                                                                                     |                                                                                                                                                    |
|---------------------------------------------------------------------------------------------------------------------------------------------------------------------------------------------------------------------|----------------------------------------------------------------------------------------------------------------------------------------------------|
| In patients with macrolide susceptible MAC pulmonary disease, should patients be treated with less than 12 months of treatment after culture negativity or 12 or more months of treatment after culture negativity? |                                                                                                                                                    |
| POPULATION:                                                                                                                                                                                                         | pulmonary MAC infection                                                                                                                            |
| INTERVENTION:                                                                                                                                                                                                       | <12 months of treatment after culture negativity                                                                                                   |
| COMPARISON:                                                                                                                                                                                                         | >/= 12 months of treatment after culture negativity                                                                                                |
| MAIN OUTCOMES:                                                                                                                                                                                                      | Culture conversion; Cure of NTM disease; Recurrence (relapse); Quality of Life; Development of antibiotic resistance; Death; Adverse drug effects; |

## Assessment

|                   | JUDGEMENT                                                                                                                                          | RESEARCH EVIDENCE                         |                                        |                 |                    |                         | ADDITIONAL CONSIDERATIONS                                                                                                                                                    |
|-------------------|----------------------------------------------------------------------------------------------------------------------------------------------------|-------------------------------------------|----------------------------------------|-----------------|--------------------|-------------------------|------------------------------------------------------------------------------------------------------------------------------------------------------------------------------|
| DESIRABLE EFFECTS | <b>How substantial are the desirable anticipated effects?</b><br><br>○ Trivial<br>○ Small<br>● Moderate<br>○ Large<br><br>○ Varies<br>○ Don't know |                                           |                                        |                 |                    |                         | Dautzenberg 1994 10 months from culture conversion?                                                                                                                          |
|                   |                                                                                                                                                    | <12 months compared to >12 months for MAC |                                        |                 |                    |                         | While not a controlled study, (Wallace, et al, 1996 Am J Respir Crit Care Med) showed high rates of relapse in patients who could only tolerate a shorter antibiotic course. |
|                   |                                                                                                                                                    | Outcomes                                  | Anticipated absolute effects* (95% CI) | Relative effect | Nº of participants | Quality of the evidence |                                                                                                                                                                              |

| UNDESIRABLE EFFECTS                 | <b>How substantial are the undesirable anticipated effects?</b> <ul style="list-style-type: none"><li>○ Large</li><li>○ Moderate</li><li>○ Small</li><li>○ Trivial</li><li>○ Varies</li><li>● Don't know</li></ul> | <table><tr><th></th><th>Risk with &gt;12 months</th><th>Risk with &lt;12 months</th><th>(95% CI)</th><th>(studies)</th><th>(GRADE)</th></tr><tr><td>Culture conversion</td><td>856 per 1000</td><td>222 per 1000 (111 to 453)</td><td>RR 0.26 (0.13 to 0.53)</td><td>207 (1 observational study)</td><td>⊕○○○ VERY LOW 1,2</td></tr><tr><td>Cure of NTM disease - not reported</td><td>-</td><td>-</td><td>-</td><td>-</td><td>-</td></tr><tr><td>Recurrence (relapse) - not reported</td><td>-</td><td>-</td><td>-</td><td>-</td><td>-</td></tr><tr><td>Quality of Life - not measured</td><td>-</td><td>-</td><td>-</td><td>-</td><td>-</td></tr><tr><td>Development of antibiotic resistance - not measured</td><td>-</td><td>-</td><td>-</td><td>-</td><td>-</td></tr><tr><td>Death - not reported</td><td>-</td><td>-</td><td>-</td><td>-</td><td>-</td></tr><tr><td>Adverse drug effects - not reported</td><td>-</td><td>-</td><td>-</td><td>-</td><td>-</td></tr></table> |                                   | Risk with >12 months   | Risk with <12 months              | (95% CI)           | (studies) | (GRADE)       | Culture conversion  | 856 per 1000 | 222 per 1000 (111 to 453) | RR 0.26 (0.13 to 0.53) | 207 (1 observational study) | ⊕○○○ VERY LOW 1,2 | Cure of NTM disease - not reported | - | - | - | - | - | Recurrence (relapse) - not reported | - | - | - | - | - | Quality of Life - not measured | - | - | - | - | - | Development of antibiotic resistance - not measured | - | - | - | - | - | Death - not reported | - | - | - | - | - | Adverse drug effects - not reported | - | - | - | - | - |  |
|-------------------------------------|--------------------------------------------------------------------------------------------------------------------------------------------------------------------------------------------------------------------|-----------------------------------------------------------------------------------------------------------------------------------------------------------------------------------------------------------------------------------------------------------------------------------------------------------------------------------------------------------------------------------------------------------------------------------------------------------------------------------------------------------------------------------------------------------------------------------------------------------------------------------------------------------------------------------------------------------------------------------------------------------------------------------------------------------------------------------------------------------------------------------------------------------------------------------------------------------------------------------|-----------------------------------|------------------------|-----------------------------------|--------------------|-----------|---------------|---------------------|--------------|---------------------------|------------------------|-----------------------------|-------------------|------------------------------------|---|---|---|---|---|-------------------------------------|---|---|---|---|---|--------------------------------|---|---|---|---|---|-----------------------------------------------------|---|---|---|---|---|----------------------|---|---|---|---|---|-------------------------------------|---|---|---|---|---|--|
|                                     |                                                                                                                                                                                                                    | Risk with >12 months                                                                                                                                                                                                                                                                                                                                                                                                                                                                                                                                                                                                                                                                                                                                                                                                                                                                                                                                                              | Risk with <12 months              | (95% CI)               | (studies)                         | (GRADE)            |           |               |                     |              |                           |                        |                             |                   |                                    |   |   |   |   |   |                                     |   |   |   |   |   |                                |   |   |   |   |   |                                                     |   |   |   |   |   |                      |   |   |   |   |   |                                     |   |   |   |   |   |  |
|                                     | Culture conversion                                                                                                                                                                                                 | 856 per 1000                                                                                                                                                                                                                                                                                                                                                                                                                                                                                                                                                                                                                                                                                                                                                                                                                                                                                                                                                                      | 222 per 1000 (111 to 453)         | RR 0.26 (0.13 to 0.53) | 207 (1 observational study)       | ⊕○○○ VERY LOW 1,2  |           |               |                     |              |                           |                        |                             |                   |                                    |   |   |   |   |   |                                     |   |   |   |   |   |                                |   |   |   |   |   |                                                     |   |   |   |   |   |                      |   |   |   |   |   |                                     |   |   |   |   |   |  |
|                                     | Cure of NTM disease - not reported                                                                                                                                                                                 | -                                                                                                                                                                                                                                                                                                                                                                                                                                                                                                                                                                                                                                                                                                                                                                                                                                                                                                                                                                                 | -                                 | -                      | -                                 | -                  |           |               |                     |              |                           |                        |                             |                   |                                    |   |   |   |   |   |                                     |   |   |   |   |   |                                |   |   |   |   |   |                                                     |   |   |   |   |   |                      |   |   |   |   |   |                                     |   |   |   |   |   |  |
|                                     | Recurrence (relapse) - not reported                                                                                                                                                                                | -                                                                                                                                                                                                                                                                                                                                                                                                                                                                                                                                                                                                                                                                                                                                                                                                                                                                                                                                                                                 | -                                 | -                      | -                                 | -                  |           |               |                     |              |                           |                        |                             |                   |                                    |   |   |   |   |   |                                     |   |   |   |   |   |                                |   |   |   |   |   |                                                     |   |   |   |   |   |                      |   |   |   |   |   |                                     |   |   |   |   |   |  |
|                                     | Quality of Life - not measured                                                                                                                                                                                     | -                                                                                                                                                                                                                                                                                                                                                                                                                                                                                                                                                                                                                                                                                                                                                                                                                                                                                                                                                                                 | -                                 | -                      | -                                 | -                  |           |               |                     |              |                           |                        |                             |                   |                                    |   |   |   |   |   |                                     |   |   |   |   |   |                                |   |   |   |   |   |                                                     |   |   |   |   |   |                      |   |   |   |   |   |                                     |   |   |   |   |   |  |
|                                     | Development of antibiotic resistance - not measured                                                                                                                                                                | -                                                                                                                                                                                                                                                                                                                                                                                                                                                                                                                                                                                                                                                                                                                                                                                                                                                                                                                                                                                 | -                                 | -                      | -                                 | -                  |           |               |                     |              |                           |                        |                             |                   |                                    |   |   |   |   |   |                                     |   |   |   |   |   |                                |   |   |   |   |   |                                                     |   |   |   |   |   |                      |   |   |   |   |   |                                     |   |   |   |   |   |  |
|                                     | Death - not reported                                                                                                                                                                                               | -                                                                                                                                                                                                                                                                                                                                                                                                                                                                                                                                                                                                                                                                                                                                                                                                                                                                                                                                                                                 | -                                 | -                      | -                                 | -                  |           |               |                     |              |                           |                        |                             |                   |                                    |   |   |   |   |   |                                     |   |   |   |   |   |                                |   |   |   |   |   |                                                     |   |   |   |   |   |                      |   |   |   |   |   |                                     |   |   |   |   |   |  |
| Adverse drug effects - not reported | -                                                                                                                                                                                                                  | -                                                                                                                                                                                                                                                                                                                                                                                                                                                                                                                                                                                                                                                                                                                                                                                                                                                                                                                                                                                 | -                                 | -                      | -                                 |                    |           |               |                     |              |                           |                        |                             |                   |                                    |   |   |   |   |   |                                     |   |   |   |   |   |                                |   |   |   |   |   |                                                     |   |   |   |   |   |                      |   |   |   |   |   |                                     |   |   |   |   |   |  |
| CERTAINTY OF EVIDENCE               | <b>What is the overall certainty of the evidence of effects?</b> <ul style="list-style-type: none"><li>● Very low</li><li>○ Low</li><li>○ Moderate</li><li>○ High</li><li>○ No included studies</li></ul>          | <b>The relative importance or values of the main outcomes of interest:</b> <table><tr><th>Outcome</th><th>Relative importance</th><th>Certainty of the evidence (GRADE)</th></tr><tr><td>Culture conversion</td><td>CRITICAL</td><td>⊕○○○ VERY LOW</td></tr><tr><td>Cure of NTM disease</td><td>CRITICAL</td><td></td></tr><tr><td>Recurrence (relapse)</td><td>CRITICAL</td><td></td></tr></table>                                                                                                                                                                                                                                                                                                                                                                                                                                                                                                                                                                               | Outcome                           | Relative importance    | Certainty of the evidence (GRADE) | Culture conversion | CRITICAL  | ⊕○○○ VERY LOW | Cure of NTM disease | CRITICAL     |                           | Recurrence (relapse)   | CRITICAL                    |                   |                                    |   |   |   |   |   |                                     |   |   |   |   |   |                                |   |   |   |   |   |                                                     |   |   |   |   |   |                      |   |   |   |   |   |                                     |   |   |   |   |   |  |
|                                     | Outcome                                                                                                                                                                                                            | Relative importance                                                                                                                                                                                                                                                                                                                                                                                                                                                                                                                                                                                                                                                                                                                                                                                                                                                                                                                                                               | Certainty of the evidence (GRADE) |                        |                                   |                    |           |               |                     |              |                           |                        |                             |                   |                                    |   |   |   |   |   |                                     |   |   |   |   |   |                                |   |   |   |   |   |                                                     |   |   |   |   |   |                      |   |   |   |   |   |                                     |   |   |   |   |   |  |
|                                     | Culture conversion                                                                                                                                                                                                 | CRITICAL                                                                                                                                                                                                                                                                                                                                                                                                                                                                                                                                                                                                                                                                                                                                                                                                                                                                                                                                                                          | ⊕○○○ VERY LOW                     |                        |                                   |                    |           |               |                     |              |                           |                        |                             |                   |                                    |   |   |   |   |   |                                     |   |   |   |   |   |                                |   |   |   |   |   |                                                     |   |   |   |   |   |                      |   |   |   |   |   |                                     |   |   |   |   |   |  |
|                                     | Cure of NTM disease                                                                                                                                                                                                | CRITICAL                                                                                                                                                                                                                                                                                                                                                                                                                                                                                                                                                                                                                                                                                                                                                                                                                                                                                                                                                                          |                                   |                        |                                   |                    |           |               |                     |              |                           |                        |                             |                   |                                    |   |   |   |   |   |                                     |   |   |   |   |   |                                |   |   |   |   |   |                                                     |   |   |   |   |   |                      |   |   |   |   |   |                                     |   |   |   |   |   |  |
| Recurrence (relapse)                | CRITICAL                                                                                                                                                                                                           |                                                                                                                                                                                                                                                                                                                                                                                                                                                                                                                                                                                                                                                                                                                                                                                                                                                                                                                                                                                   |                                   |                        |                                   |                    |           |               |                     |              |                           |                        |                             |                   |                                    |   |   |   |   |   |                                     |   |   |   |   |   |                                |   |   |   |   |   |                                                     |   |   |   |   |   |                      |   |   |   |   |   |                                     |   |   |   |   |   |  |

|        |                                                                                                                                                                                                                                                                                                                                                                                |                                                                                                                                                                                                                                                                                                                                                                                                                                                                                                                                                                                                                                                                                                                                                                                                                                                                                                                                                                                                                                                                                                                                                                                 |          |  |  |
|--------|--------------------------------------------------------------------------------------------------------------------------------------------------------------------------------------------------------------------------------------------------------------------------------------------------------------------------------------------------------------------------------|---------------------------------------------------------------------------------------------------------------------------------------------------------------------------------------------------------------------------------------------------------------------------------------------------------------------------------------------------------------------------------------------------------------------------------------------------------------------------------------------------------------------------------------------------------------------------------------------------------------------------------------------------------------------------------------------------------------------------------------------------------------------------------------------------------------------------------------------------------------------------------------------------------------------------------------------------------------------------------------------------------------------------------------------------------------------------------------------------------------------------------------------------------------------------------|----------|--|--|
|        |                                                                                                                                                                                                                                                                                                                                                                                | Quality of Life                                                                                                                                                                                                                                                                                                                                                                                                                                                                                                                                                                                                                                                                                                                                                                                                                                                                                                                                                                                                                                                                                                                                                                 | CRITICAL |  |  |
|        |                                                                                                                                                                                                                                                                                                                                                                                | Development of antibiotic resistance                                                                                                                                                                                                                                                                                                                                                                                                                                                                                                                                                                                                                                                                                                                                                                                                                                                                                                                                                                                                                                                                                                                                            | CRITICAL |  |  |
|        |                                                                                                                                                                                                                                                                                                                                                                                | Death                                                                                                                                                                                                                                                                                                                                                                                                                                                                                                                                                                                                                                                                                                                                                                                                                                                                                                                                                                                                                                                                                                                                                                           | CRITICAL |  |  |
|        |                                                                                                                                                                                                                                                                                                                                                                                | Adverse drug effects                                                                                                                                                                                                                                                                                                                                                                                                                                                                                                                                                                                                                                                                                                                                                                                                                                                                                                                                                                                                                                                                                                                                                            | CRITICAL |  |  |
|        |                                                                                                                                                                                                                                                                                                                                                                                |                                                                                                                                                                                                                                                                                                                                                                                                                                                                                                                                                                                                                                                                                                                                                                                                                                                                                                                                                                                                                                                                                                                                                                                 |          |  |  |
| VALUES | <p><b>Is there important uncertainty about or variability in how much people value the main outcomes?</b></p> <ul style="list-style-type: none"> <li>○ Important uncertainty or variability</li> <li>● Possibly important uncertainty or variability</li> <li>○ Probably no important uncertainty or variability</li> <li>○ No important uncertainty or variability</li> </ul> | <p>Values and preferences:</p> <p>Three relevant studies were identified that provide data on patient values and preferences:</p> <p>Mehta and Marras, 2011 evaluated the impact of pulmonary NTM on health-related quality of life. In this study, patients with pulmonary NTM had significantly impaired health-related quality of life with two QOL measures significantly lower than historical normal controls. Multivariable analysis showed an association between QOL scores and lung function</p> <p>Hong, et al, 2014 also evaluated the impact of pulmonary NTM on health-related quality of life. This was a direct comparison between patients with NTM disease and healthy subjects and found patients with NTM reported more health status issues and anxiety/depression issues than healthy controls. Lung function was also independently associated with QOL scores.</p> <p>Czaja, et al 2015 evaluated change in quality of life in response to various treatment regimens for <i>M. abscessus</i> (many patients had coinfection with MAC or <i>Pseudomonas</i>). Mean QOL score was significantly improved after treatment at 3, 6, 12, and 24 months.</p> |          |  |  |

**Does the balance between desirable and undesirable effects favor the intervention or the comparison?**

- Favors the comparison
- Probably favors the comparison
- Does not favor either the intervention or the comparison
- Probably favors the intervention
- Favors the intervention
- Varies
- Don't know

**<12 months compared to >12 months for MAC**

| Outcomes                                            | Anticipated absolute effects* (95% CI) |                                     | Relative effect (95% CI)         | Nº of participants (studies)   | Quality of the evidence (GRADE) |
|-----------------------------------------------------|----------------------------------------|-------------------------------------|----------------------------------|--------------------------------|---------------------------------|
|                                                     | Risk with >12 months                   | Risk with <12 months                |                                  |                                |                                 |
| Culture conversion                                  | 856 per 1000                           | <b>222 per 1000</b><br>(111 to 453) | <b>RR 0.26</b><br>(0.13 to 0.53) | 207<br>(1 observational study) | ⊕○○○<br>VERY LOW<br>1,2         |
| Cure of NTM disease - not reported                  | -                                      | -                                   | -                                | -                              | -                               |
| Recurrence (relapse) - not reported                 | -                                      | -                                   | -                                | -                              | -                               |
| Quality of Life - not measured                      | -                                      | -                                   | -                                | -                              | -                               |
| Development of antibiotic resistance - not measured | -                                      | -                                   | -                                | -                              | -                               |
| Death - not reported                                | -                                      | -                                   | -                                | -                              | -                               |
| Adverse drug effects - not reported                 | -                                      | -                                   | -                                | -                              | -                               |

Comparison is >12 months of treatment

The specter of early disease relapse merits a conservative approach in the absence of more convincing data for shorter course therapy.



|                    |                                                                                                                                                                                                                                                                                                                                                                                                                                 |                                      |  |
|--------------------|---------------------------------------------------------------------------------------------------------------------------------------------------------------------------------------------------------------------------------------------------------------------------------------------------------------------------------------------------------------------------------------------------------------------------------|--------------------------------------|--|
| RESOURCES REQUIRED | <p><b>How large are the resource requirements (costs)?</b></p> <ul style="list-style-type: none"> <li>○ Large costs</li> <li>○ Moderate costs</li> <li>● Negligible costs and savings</li> <li>○ Moderate savings</li> <li>○ Large savings</li> <li>○ Varies</li> <li>○ Don't know</li> </ul>                                                                                                                                   | No research evidence was identified. |  |
| COST EFFECTIVENESS | <p><b>Does the cost-effectiveness of the intervention favor the intervention or the comparison?</b></p> <ul style="list-style-type: none"> <li>○ Favors the comparison</li> <li>○ Probably favors the comparison</li> <li>● Does not favor either the intervention or the comparison</li> <li>○ Probably favors the intervention</li> <li>○ Favors the intervention</li> <li>○ Varies</li> <li>○ No included studies</li> </ul> | No research evidence was identified. |  |
| EQUITY             | <p><b>What would be the impact on health equity?</b></p> <ul style="list-style-type: none"> <li>○ Reduced</li> <li>○ Probably reduced</li> <li>● Probably no impact</li> <li>○ Probably increased</li> <li>○ Increased</li> <li>○ Varies</li> <li>○ Don't know</li> </ul>                                                                                                                                                       | No research evidence was identified. |  |
| ACCEPTABILITY      | <p><b>Is the intervention acceptable to key stakeholders?</b></p> <ul style="list-style-type: none"> <li>○ No</li> <li>○ Probably no</li> <li>● Probably yes</li> <li>○ Yes</li> </ul>                                                                                                                                                                                                                                          | No research evidence was identified. |  |

|             |                                                                                                                                                                                                                |                                      |  |
|-------------|----------------------------------------------------------------------------------------------------------------------------------------------------------------------------------------------------------------|--------------------------------------|--|
|             | <ul style="list-style-type: none"> <li>○ Varies</li> <li>○ Don't know</li> </ul>                                                                                                                               |                                      |  |
| FEASIBILITY | <b>Is the intervention feasible to implement?</b> <ul style="list-style-type: none"> <li>○ No</li> <li>○ Probably no</li> <li>● Probably yes</li> <li>○ Yes</li> <li>○ Varies</li> <li>○ Don't know</li> </ul> | No research evidence was identified. |  |

## Summary of judgments

|                       | JUDGEMENT                            |                                               |                                                  |                                         |                         |        |                     | IMPLICATIONS |
|-----------------------|--------------------------------------|-----------------------------------------------|--------------------------------------------------|-----------------------------------------|-------------------------|--------|---------------------|--------------|
| DESIRABLE EFFECTS     | Trivial                              | Small                                         | Moderate                                         | Large                                   |                         | Varies | Don't know          |              |
| UNDESIRABLE EFFECTS   | Large                                | Moderate                                      | Small                                            | Trivial                                 |                         | Varies | Don't know          |              |
| CERTAINTY OF EVIDENCE | Very low                             | Low                                           | Moderate                                         | High                                    |                         |        | No included studies |              |
| VALUES                | Important uncertainty or variability | Possibly important uncertainty or variability | Probably no important uncertainty or variability | No important uncertainty or variability |                         |        |                     |              |
| BALANCE OF EFFECTS    | Favors the comparison                | Probably favors the comparison                | Does not favor either the intervention or        | Probably favors the intervention        | Favors the intervention | Varies | Don't know          |              |

|                           | JUDGEMENT             |                                |                                                                 |                                  |                         |        |                     | IMPLICATIONS |
|---------------------------|-----------------------|--------------------------------|-----------------------------------------------------------------|----------------------------------|-------------------------|--------|---------------------|--------------|
|                           |                       |                                | the comparison                                                  |                                  |                         |        |                     |              |
| <b>RESOURCES REQUIRED</b> | Large costs           | Moderate costs                 | <b>Negligible costs and savings</b>                             | Moderate savings                 | Large savings           | Varies | Don't know          |              |
| <b>COST EFFECTIVENESS</b> | Favors the comparison | Probably favors the comparison | <b>Does not favor either the intervention or the comparison</b> | Probably favors the intervention | Favors the intervention | Varies | No included studies |              |
| <b>EQUITY</b>             | Reduced               | Probably reduced               | <b>Probably no impact</b>                                       | Probably increased               | Increased               | Varies | Don't know          |              |
| <b>ACCEPTABILITY</b>      | No                    | Probably no                    | <b>Probably yes</b>                                             | Yes                              |                         | Varies | Don't know          |              |
| <b>FEASIBILITY</b>        | No                    | Probably no                    | <b>Probably yes</b>                                             | Yes                              |                         | Varies | Don't know          |              |

## Conclusions

**In patients with macrolide susceptible MAC pulmonary disease, should patients be treated with less than 12 months of treatment after culture negativity or 12 or more months of treatment after culture negativity?**

| TYPE OF RECOMMENDATION | Strong recommendation against the intervention | Conditional recommendation against the intervention | Conditional recommendation for either the intervention or the comparison | Conditional recommendation for the intervention | Strong recommendation for the intervention |
|------------------------|------------------------------------------------|-----------------------------------------------------|--------------------------------------------------------------------------|-------------------------------------------------|--------------------------------------------|
|                        | ○                                              | ●                                                   | ○                                                                        | ○                                               | ○                                          |

|                                      |                                                                                                                                                                                                                                                                                                                 |
|--------------------------------------|-----------------------------------------------------------------------------------------------------------------------------------------------------------------------------------------------------------------------------------------------------------------------------------------------------------------|
| <b>RECOMMENDATION</b>                | <p>We suggest that patients with MAC pulmonary disease should receive treatment for at least 12 months after culture conversion (conditional recommendation, very low confidence in estimates of effect).</p> <p>The panel members voted unanimously for a conditional recommendation for the intervention.</p> |
| <b>JUSTIFICATION</b>                 | <p>Optimal treatment length is not known. Treatment for greater than 12 months after culture negativity is a conservative approach given risks of relapse.</p> <p>The microbiologic goal is 12 months of culture negativity while on treatment</p>                                                              |
| <b>SUBGROUP CONSIDERATIONS</b>       |                                                                                                                                                                                                                                                                                                                 |
| <b>IMPLEMENTATION CONSIDERATIONS</b> |                                                                                                                                                                                                                                                                                                                 |
| <b>MONITORING AND EVALUATION</b>     | 6 month cultures - sputum culture, but no need for bronchoscopy to obtain this                                                                                                                                                                                                                                  |
| <b>RESEARCH PRIORITIES</b>           | <p>Clinical trial with strict definitions looking at culture conversion time (patients who do not convert by 6 months)</p> <p>Treatment length, intermittent treatment for relapse/reinfection</p>                                                                                                              |

## Table E4.10. Question X

In patients with *M. kansasii* pulmonary disease, should an isoniazid-containing regimen or a macrolide-containing regimen be used for treatment?

|                       |                                                                                                                                            |
|-----------------------|--------------------------------------------------------------------------------------------------------------------------------------------|
| <b>POPULATION:</b>    | <i>Mycobacterium kansasii</i>                                                                                                              |
| <b>INTERVENTION:</b>  | a INH-containing regimen                                                                                                                   |
| <b>COMPARISON:</b>    | a macrolide-containing regimen                                                                                                             |
| <b>MAIN OUTCOMES:</b> | Cure of NTM; Death; Recurrence (relapse); Development of antibiotic resistance; Quality of life; Culture conversion; Adverse drug effects; |

## Assessment

|                   | JUDGEMENT                                                                                                                                          | RESEARCH EVIDENCE                                               |                                        |               |                          |                              | ADDITIONAL CONSIDERATIONS                                                                                                                                                                                                                                                                                                                                                                                                                                                                                                                                                                                           |                                 |
|-------------------|----------------------------------------------------------------------------------------------------------------------------------------------------|-----------------------------------------------------------------|----------------------------------------|---------------|--------------------------|------------------------------|---------------------------------------------------------------------------------------------------------------------------------------------------------------------------------------------------------------------------------------------------------------------------------------------------------------------------------------------------------------------------------------------------------------------------------------------------------------------------------------------------------------------------------------------------------------------------------------------------------------------|---------------------------------|
| DESIRABLE EFFECTS | <b>How substantial are the desirable anticipated effects?</b><br><br>○ Trivial<br>○ Small<br>○ Moderate<br>○ Large<br><br>○ Varies<br>● Don't know | <b>INH compared to no INH for <i>Mycobacterium kansasii</i></b> |                                        |               |                          |                              | One study from the Research Committee of the British Thoracic Society in 1994 was a prospective study of 9 months treatment with rifampin and ethambutol. They found: 9/149 deaths, 68% had negative sputum (32% had no sputum, 0% positive at 9 months). There was a 9.7% relapse rate - this study had a shorter duration of therapy and did not have INH.<br><br>Removing the potential for INH toxicity is a desirable anticipated effect. The importance of INH in the treatment regimen for <i>M. kansasii</i> is at best questionable, more so in an era when safer and more effective agents are available. |                                 |
|                   |                                                                                                                                                    | Outcomes                                                        | Anticipated absolute effects* (95% CI) |               | Relative effect (95% CI) | Nº of participants (studies) |                                                                                                                                                                                                                                                                                                                                                                                                                                                                                                                                                                                                                     | Quality of the evidence (GRADE) |
|                   |                                                                                                                                                    |                                                                 | Risk with no INH                       | Risk with INH |                          |                              |                                                                                                                                                                                                                                                                                                                                                                                                                                                                                                                                                                                                                     |                                 |
|                   |                                                                                                                                                    | Cure of NTM - not measured                                      | -                                      | -             | -                        | -                            |                                                                                                                                                                                                                                                                                                                                                                                                                                                                                                                                                                                                                     | -                               |
|                   |                                                                                                                                                    | Death - not measured                                            | -                                      | -             | -                        | -                            |                                                                                                                                                                                                                                                                                                                                                                                                                                                                                                                                                                                                                     | -                               |
|                   |                                                                                                                                                    | Recurrence (relapse)                                            | -                                      | -             | -                        | -                            |                                                                                                                                                                                                                                                                                                                                                                                                                                                                                                                                                                                                                     | -                               |

|                                                     |                                                                                                                                                                                                                                                                                                                                                                      |                                                                                                                                                                                                                                                                                                                                                                                                                                                      |                                                     |   |   |   |   |   |                                |   |   |   |   |   |                                   |   |   |   |   |   |                                     |   |   |   |   |   |  |
|-----------------------------------------------------|----------------------------------------------------------------------------------------------------------------------------------------------------------------------------------------------------------------------------------------------------------------------------------------------------------------------------------------------------------------------|------------------------------------------------------------------------------------------------------------------------------------------------------------------------------------------------------------------------------------------------------------------------------------------------------------------------------------------------------------------------------------------------------------------------------------------------------|-----------------------------------------------------|---|---|---|---|---|--------------------------------|---|---|---|---|---|-----------------------------------|---|---|---|---|---|-------------------------------------|---|---|---|---|---|--|
| UNDESIRABLE EFFECTS                                 | <p><b>How substantial are the undesirable anticipated effects?</b></p> <p>○ Large</p> <p>○ Moderate</p> <p>○ Small</p> <p>○ Trivial</p> <p>○ Varies</p> <p>● Don't know</p>                                                                                                                                                                                          | <table><tr><td>Development of antibiotic resistance - not measured</td><td>-</td><td>-</td><td>-</td><td>-</td><td>-</td></tr><tr><td>Quality of life - not measured</td><td>-</td><td>-</td><td>-</td><td>-</td><td>-</td></tr><tr><td>Culture conversion - not reported</td><td>-</td><td>-</td><td>-</td><td>-</td><td>-</td></tr><tr><td>Adverse drug effects - not reported</td><td>-</td><td>-</td><td>-</td><td>-</td><td>-</td></tr></table> | Development of antibiotic resistance - not measured | - | - | - | - | - | Quality of life - not measured | - | - | - | - | - | Culture conversion - not reported | - | - | - | - | - | Adverse drug effects - not reported | - | - | - | - | - |  |
| Development of antibiotic resistance - not measured | -                                                                                                                                                                                                                                                                                                                                                                    | -                                                                                                                                                                                                                                                                                                                                                                                                                                                    | -                                                   | - | - |   |   |   |                                |   |   |   |   |   |                                   |   |   |   |   |   |                                     |   |   |   |   |   |  |
| Quality of life - not measured                      | -                                                                                                                                                                                                                                                                                                                                                                    | -                                                                                                                                                                                                                                                                                                                                                                                                                                                    | -                                                   | - | - |   |   |   |                                |   |   |   |   |   |                                   |   |   |   |   |   |                                     |   |   |   |   |   |  |
| Culture conversion - not reported                   | -                                                                                                                                                                                                                                                                                                                                                                    | -                                                                                                                                                                                                                                                                                                                                                                                                                                                    | -                                                   | - | - |   |   |   |                                |   |   |   |   |   |                                   |   |   |   |   |   |                                     |   |   |   |   |   |  |
| Adverse drug effects - not reported                 | -                                                                                                                                                                                                                                                                                                                                                                    | -                                                                                                                                                                                                                                                                                                                                                                                                                                                    | -                                                   | - | - |   |   |   |                                |   |   |   |   |   |                                   |   |   |   |   |   |                                     |   |   |   |   |   |  |
| CERTAINTY OF EVIDENCE                               | <p><b>What is the overall certainty of the evidence of effects?</b></p> <p>○ Very low</p> <p>○ Low</p> <p>○ Moderate</p> <p>○ High</p> <p>● No included studies</p>                                                                                                                                                                                                  | No research evidence was identified.                                                                                                                                                                                                                                                                                                                                                                                                                 |                                                     |   |   |   |   |   |                                |   |   |   |   |   |                                   |   |   |   |   |   |                                     |   |   |   |   |   |  |
| VALUES                                              | <p><b>Is there important uncertainty about or variability in how much people value the main outcomes?</b></p> <p>○ Important uncertainty or variability</p> <p>○ Possibly important uncertainty or variability</p> <p>○ Probably no important uncertainty or variability</p> <p>○ No important uncertainty or variability</p> <p>● No known undesirable outcomes</p> | No research evidence was identified.                                                                                                                                                                                                                                                                                                                                                                                                                 |                                                     |   |   |   |   |   |                                |   |   |   |   |   |                                   |   |   |   |   |   |                                     |   |   |   |   |   |  |

|                    |                                                                                                                                                                                                                                                                                                                                                                                                                                   |                                      |  |
|--------------------|-----------------------------------------------------------------------------------------------------------------------------------------------------------------------------------------------------------------------------------------------------------------------------------------------------------------------------------------------------------------------------------------------------------------------------------|--------------------------------------|--|
| BALANCE OF EFFECTS | <p><b>Does the balance between desirable and undesirable effects favor the intervention or the comparison?</b></p> <ul style="list-style-type: none"> <li>○ Favors the comparison</li> <li>○ Probably favors the comparison</li> <li>● Does not favor either the intervention or the comparison</li> <li>○ Probably favors the intervention</li> <li>○ Favors the intervention</li> <li>○ Varies</li> <li>○ Don't know</li> </ul> | No research evidence was identified. |  |
| RESOURCES REQUIRED | <p><b>How large are the resource requirements (costs)?</b></p> <ul style="list-style-type: none"> <li>○ Large costs</li> <li>○ Moderate costs</li> <li>● Negligible costs and savings</li> <li>○ Moderate savings</li> <li>○ Large savings</li> <li>○ Varies</li> <li>○ Don't know</li> </ul>                                                                                                                                     | No research evidence was identified. |  |
| COST EFFECTIVENESS | <p><b>Does the cost-effectiveness of the intervention favor the intervention or the comparison?</b></p> <ul style="list-style-type: none"> <li>○ Favors the comparison</li> <li>○ Probably favors the comparison</li> <li>● Does not favor either the intervention or the comparison</li> <li>○ Probably favors the intervention</li> <li>○ Favors the intervention</li> <li>○ Varies</li> <li>○ No included studies</li> </ul>   | No research evidence was identified. |  |
| EQUITY             | <p><b>What would be the impact on health equity?</b></p> <ul style="list-style-type: none"> <li>○ Reduced</li> <li>○ Probably reduced</li> <li>● Probably no impact</li> </ul>                                                                                                                                                                                                                                                    | No research evidence was identified. |  |

|               |                                                                                                                                                                                                                         |                                      |  |
|---------------|-------------------------------------------------------------------------------------------------------------------------------------------------------------------------------------------------------------------------|--------------------------------------|--|
|               | <ul style="list-style-type: none"> <li>○ Probably increased</li> <li>○ Increased</li> <li>○ Varies</li> <li>○ Don't know</li> </ul>                                                                                     |                                      |  |
| ACCEPTABILITY | <b>Is the intervention acceptable to key stakeholders?</b> <ul style="list-style-type: none"> <li>○ No</li> <li>○ Probably no</li> <li>● Probably yes</li> <li>○ Yes</li> <li>○ Varies</li> <li>○ Don't know</li> </ul> | No research evidence was identified. |  |
| FEASIBILITY   | <b>Is the intervention feasible to implement?</b> <ul style="list-style-type: none"> <li>○ No</li> <li>○ Probably no</li> <li>● Probably yes</li> <li>○ Yes</li> <li>○ Varies</li> <li>○ Don't know</li> </ul>          | No research evidence was identified. |  |

## Summary of judgments

|                   | JUDGEMENT |          |          |         |  |        |            | IMPLICATIONS |
|-------------------|-----------|----------|----------|---------|--|--------|------------|--------------|
| DESIRABLE EFFECTS | Trivial   | Small    | Moderate | Large   |  | Varies | Don't know |              |
| UNDESIRABLE       | Large     | Moderate | Small    | Trivial |  | Varies | Don't know |              |



|                       | JUDGEMENT                            |                                               |                                                          |                                         |                         |        |                               | IMPLICATIONS |
|-----------------------|--------------------------------------|-----------------------------------------------|----------------------------------------------------------|-----------------------------------------|-------------------------|--------|-------------------------------|--------------|
| EFFECTS               |                                      |                                               |                                                          |                                         |                         |        |                               |              |
| CERTAINTY OF EVIDENCE | Very low                             | Low                                           | Moderate                                                 | High                                    |                         |        | No included studies           |              |
| VALUES                | Important uncertainty or variability | Possibly important uncertainty or variability | Probably no important uncertainty or variability         | No important uncertainty or variability |                         |        | No known undesirable outcomes |              |
| BALANCE OF EFFECTS    | Favors the comparison                | Probably favors the comparison                | Does not favor either the intervention or the comparison | Probably favors the intervention        | Favors the intervention | Varies | Don't know                    |              |
| RESOURCES REQUIRED    | Large costs                          | Moderate costs                                | Negligible costs and savings                             | Moderate savings                        | Large savings           | Varies | Don't know                    |              |
| COST EFFECTIVENESS    | Favors the comparison                | Probably favors the comparison                | Does not favor either the intervention or the comparison | Probably favors the intervention        | Favors the intervention | Varies | No included studies           |              |
| EQUITY                | Reduced                              | Probably reduced                              | Probably no impact                                       | Probably increased                      | Increased               | Varies | Don't know                    |              |
| ACCEPTABILITY         | No                                   | Probably no                                   | Probably yes                                             | Yes                                     |                         | Varies | Don't know                    |              |
| FEASIBILITY           | No                                   | Probably no                                   | Probably yes                                             | Yes                                     |                         | Varies | Don't know                    |              |

## Conclusions

**In patients with *M. kansasii* pulmonary disease, should an isoniazid-containing regimen or a macrolide-containing regimen be used for treatment?**

| TYPE OF RECOMMENDATION               | Strong recommendation against the intervention                                                                                                                                                                                                                                                                                                                                                                                                                                            | Conditional recommendation against the intervention | Conditional recommendation for either the intervention or the comparison | Conditional recommendation for the intervention | Strong recommendation for the intervention |
|--------------------------------------|-------------------------------------------------------------------------------------------------------------------------------------------------------------------------------------------------------------------------------------------------------------------------------------------------------------------------------------------------------------------------------------------------------------------------------------------------------------------------------------------|-----------------------------------------------------|--------------------------------------------------------------------------|-------------------------------------------------|--------------------------------------------|
|                                      | ○                                                                                                                                                                                                                                                                                                                                                                                                                                                                                         | ○                                                   | ●                                                                        | ○                                               | ○                                          |
| <b>RECOMMENDATION</b>                | <p>In patients with rifampicin susceptible <i>M. kansasii</i> pulmonary disease, we suggest a regimen of rifampicin, ethambutol, and either isoniazid or macrolide. (conditional recommendation, very low confidence in estimates of effect ).</p> <p>The panel members voted unanimously for a conditional recommendation for either the intervention or comparison.</p>                                                                                                                 |                                                     |                                                                          |                                                 |                                            |
| <b>JUSTIFICATION</b>                 | <p>Isoniazid is widely used at present for treatment of <i>M. kansasii</i> and in clinical studies and the experience of the committee members, there have been good outcomes when using this.</p> <p>There have been higher relapse rates in regimens without INH (or macrolides), albeit in non-comparative studies.</p> <p>Based on the results of two small retrospective cohort studies and the experience of the committee, a macrolide may be effectively substituted for INH.</p> |                                                     |                                                                          |                                                 |                                            |
| <b>SUBGROUP CONSIDERATIONS</b>       |                                                                                                                                                                                                                                                                                                                                                                                                                                                                                           |                                                     |                                                                          |                                                 |                                            |
| <b>IMPLEMENTATION CONSIDERATIONS</b> |                                                                                                                                                                                                                                                                                                                                                                                                                                                                                           |                                                     |                                                                          |                                                 |                                            |
| <b>MONITORING AND EVALUATION</b>     |                                                                                                                                                                                                                                                                                                                                                                                                                                                                                           |                                                     |                                                                          |                                                 |                                            |

**RESEARCH PRIORITIES**

# Table E4.11. Question XI

|                                                                                                                                                     |                                                                                                                                                                                                       |
|-----------------------------------------------------------------------------------------------------------------------------------------------------|-------------------------------------------------------------------------------------------------------------------------------------------------------------------------------------------------------|
| In patients with rifampicin-susceptible <i>M. kansasii</i> pulmonary disease, should amikacin or streptomycin be included in the treatment regimen? |                                                                                                                                                                                                       |
| POPULATION:                                                                                                                                         | M kansasii pulmonary infection                                                                                                                                                                        |
| INTERVENTION:                                                                                                                                       | a treatment regimen with a parenteral agent                                                                                                                                                           |
| COMPARISON:                                                                                                                                         | a treatment regimen without a parenteral agent                                                                                                                                                        |
| MAIN OUTCOMES:                                                                                                                                      | Cure of NTM; Death; Recurrence (relapse); Culture Conversion; Any adverse effect; Serious Adverse Effect; Withdrawal owing to adverse effects; Quality of Life; Development of Antibiotic Resistance; |

## Assessment

| JUDGEMENT         |                                                                                                                                                    | RESEARCH EVIDENCE                                         |                                        |                      |                          |                              | ADDITIONAL CONSIDERATIONS                                                                                                            |
|-------------------|----------------------------------------------------------------------------------------------------------------------------------------------------|-----------------------------------------------------------|----------------------------------------|----------------------|--------------------------|------------------------------|--------------------------------------------------------------------------------------------------------------------------------------|
| DESIRABLE EFFECTS | <b>How substantial are the desirable anticipated effects?</b><br><br>○ Trivial<br>● Small<br>○ Moderate<br>○ Large<br><br>○ Varies<br>○ Don't know | Parenteral compared to no parenteral agent for M kansasii |                                        |                      |                          |                              | Except for rifampin-resistant <i>M. kansasii</i> disease, parenteral agents are seldom needed to treat use with <i>M. kansasii</i> . |
|                   |                                                                                                                                                    | Outcomes                                                  | Anticipated absolute effects* (95% CI) |                      | Relative effect (95% CI) | Nº of participants (studies) | Quality of the evidence (GRADE)                                                                                                      |
|                   |                                                                                                                                                    |                                                           | Risk with no parenteral agent          | Risk with Parenteral |                          |                              |                                                                                                                                      |
|                   |                                                                                                                                                    |                                                           |                                        |                      |                          |                              |                                                                                                                                      |

**How substantial are the undesirable anticipated effects?**

- Large
- Moderate
- Small
- Trivial
  
- Varies
- Don't know

|                                                              |                   |            |               |                                        |                         |
|--------------------------------------------------------------|-------------------|------------|---------------|----------------------------------------|-------------------------|
| Cure of NTM                                                  | 8/10 (80.0%)      | -          | -             | 10<br>(1<br>observational<br>study)    | ⊕○○○<br>VERY LOW<br>1,2 |
| Death                                                        | 30/121<br>(24.8%) | not pooled | not<br>pooled | 121<br>(2<br>observational<br>studies) | ⊕○○○<br>VERY LOW<br>1,2 |
| Recurrence<br>(relapse)                                      | 6/115<br>(5.2%)   | not pooled | not<br>pooled | 115<br>(2<br>observational<br>studies) | ⊕○○○<br>VERY LOW<br>1,2 |
| Culture Conversion                                           | 42/44<br>(95.5%)  | not pooled | not<br>pooled | 44<br>(2<br>observational<br>studies)  | ⊕○○○<br>VERY LOW<br>1,2 |
| Any adverse effect                                           | 11/75 (14.7%)     | -          | -             | 75<br>(1<br>observational<br>study)    | ⊕○○○<br>VERY LOW<br>1,2 |
| Serious Adverse<br>Effect                                    | 0/75 (0.0%)       | -          | -             | 75<br>(1<br>observational<br>study)    | ⊕○○○<br>VERY LOW<br>1,2 |
| Withdrawal owing<br>to adverse effects                       | 7/75 (9.3%)       | -          | -             | 75<br>(1<br>observational<br>study)    | ⊕○○○<br>VERY LOW<br>1,2 |
| Quality of Life - not<br>measured                            | -                 | -          | -             | -                                      | -                       |
| Development of<br>Antibiotic<br>Resistance - not<br>measured | -                 | -          | -             | -                                      | -                       |

Success rate is so high with current regimens, parenteral agents are rarely being used - risk of toxicity and adverse effects may outweigh benefit

**What is the overall certainty of the evidence of effects?**

- Very low
- Low
- Moderate
- High
- No included studies

**The relative importance or values of the main outcomes of interest:**

| Outcome                              | Relative importance | Certainty of the evidence (GRADE) |
|--------------------------------------|---------------------|-----------------------------------|
| Cure of NTM                          | CRITICAL            | ⊕○○○<br>VERY LOW                  |
| Death                                | CRITICAL            | ⊕○○○<br>VERY LOW                  |
| Recurrence (relapse)                 | CRITICAL            | ⊕○○○<br>VERY LOW                  |
| Culture Conversion                   | CRITICAL            | ⊕○○○<br>VERY LOW                  |
| Any adverse effect                   | CRITICAL            | ⊕○○○<br>VERY LOW                  |
| Serious Adverse Effect               | CRITICAL            | ⊕○○○<br>VERY LOW                  |
| Withdrawal owing to adverse effects  | CRITICAL            | ⊕○○○<br>VERY LOW                  |
| Quality of Life                      | CRITICAL            | -                                 |
| Development of Antibiotic Resistance | CRITICAL            | -                                 |

|        |                                                                                                                                                                                                                                                                                                                                                                                |                                                                                                                                                                                                                                                                                                                                                                                                                                                                                                                                                                                                                                                                                                                                                                                                                                                                                                                                                                                                                                                                                                                                                                                 |  |
|--------|--------------------------------------------------------------------------------------------------------------------------------------------------------------------------------------------------------------------------------------------------------------------------------------------------------------------------------------------------------------------------------|---------------------------------------------------------------------------------------------------------------------------------------------------------------------------------------------------------------------------------------------------------------------------------------------------------------------------------------------------------------------------------------------------------------------------------------------------------------------------------------------------------------------------------------------------------------------------------------------------------------------------------------------------------------------------------------------------------------------------------------------------------------------------------------------------------------------------------------------------------------------------------------------------------------------------------------------------------------------------------------------------------------------------------------------------------------------------------------------------------------------------------------------------------------------------------|--|
|        |                                                                                                                                                                                                                                                                                                                                                                                |                                                                                                                                                                                                                                                                                                                                                                                                                                                                                                                                                                                                                                                                                                                                                                                                                                                                                                                                                                                                                                                                                                                                                                                 |  |
| VALUES | <p><b>Is there important uncertainty about or variability in how much people value the main outcomes?</b></p> <ul style="list-style-type: none"> <li>○ Important uncertainty or variability</li> <li>● Possibly important uncertainty or variability</li> <li>○ Probably no important uncertainty or variability</li> <li>○ No important uncertainty or variability</li> </ul> | <p>Values and preferences:</p> <p>Three relevant studies were identified that provide data on patient values and preferences:</p> <p>Mehta and Marras, 2011 evaluated the impact of pulmonary NTM on health-related quality of life. In this study, patients with pulmonary NTM had significantly impaired health-related quality of life with two QOL measures significantly lower than historical normal controls. Multivariable analysis showed an association between QOL scores and lung function</p> <p>Hong, et al, 2014 also evaluated the impact of pulmonary NTM on health-related quality of life. This was a direct comparison between patients with NTM disease and healthy subjects and found patients with NTM reported more health status issues and anxiety/depression issues than healthy controls. Lung function was also independently associated with QOL scores.</p> <p>Czaja, et al 2015 evaluated change in quality of life in response to various treatment regimens for <i>M. abscessus</i> (many patients had coinfection with MAC or <i>Pseudomonas</i>). Mean QOL score was significantly improved after treatment at 3, 6, 12, and 24 months.</p> |  |

| BALANCE OF EFFECTS                                        | <p><b>Does the balance between desirable and undesirable effects favor the intervention or the comparison?</b></p> <ul style="list-style-type: none"><li>○ Favors the comparison</li><li>● Probably favors the comparison</li><li>○ Does not favor either the intervention or the comparison</li><li>○ Probably favors the intervention</li><li>○ Favors the intervention</li><li>○ Varies</li><li>○ Don't know</li></ul> | <table><tr><th colspan="6">Parenteral compared to no parenteral agent for M kansasii</th></tr><tr><th rowspan="2">Outcomes</th><th colspan="2">Anticipated absolute effects* (95% CI)</th><th rowspan="2">Relative effect (95% CI)</th><th rowspan="2">Nº of participants (studies)</th><th rowspan="2">Quality of the evidence (GRADE)</th></tr><tr><th>Risk with no parenteral agent</th><th>Risk with Parenteral</th></tr><tr><td>Cure of NTM</td><td>8/10 (80.0%)</td><td>-</td><td>-</td><td>10 (1 observational study)</td><td>⊕○○○<br/>VERY LOW<br/>1,2</td></tr><tr><td>Death</td><td>30/121 (24.8%)</td><td>not pooled</td><td>not pooled</td><td>121 (2 observational studies)</td><td>⊕○○○<br/>VERY LOW<br/>1,2</td></tr></table> | Parenteral compared to no parenteral agent for M kansasii |                               |                                 |  |  |  | Outcomes | Anticipated absolute effects* (95% CI) |  | Relative effect (95% CI) | Nº of participants (studies) | Quality of the evidence (GRADE) | Risk with no parenteral agent | Risk with Parenteral | Cure of NTM | 8/10 (80.0%) | - | - | 10 (1 observational study) | ⊕○○○<br>VERY LOW<br>1,2 | Death | 30/121 (24.8%) | not pooled | not pooled | 121 (2 observational studies) | ⊕○○○<br>VERY LOW<br>1,2 |  |
|-----------------------------------------------------------|---------------------------------------------------------------------------------------------------------------------------------------------------------------------------------------------------------------------------------------------------------------------------------------------------------------------------------------------------------------------------------------------------------------------------|----------------------------------------------------------------------------------------------------------------------------------------------------------------------------------------------------------------------------------------------------------------------------------------------------------------------------------------------------------------------------------------------------------------------------------------------------------------------------------------------------------------------------------------------------------------------------------------------------------------------------------------------------------------------------------------------------------------------------------------------|-----------------------------------------------------------|-------------------------------|---------------------------------|--|--|--|----------|----------------------------------------|--|--------------------------|------------------------------|---------------------------------|-------------------------------|----------------------|-------------|--------------|---|---|----------------------------|-------------------------|-------|----------------|------------|------------|-------------------------------|-------------------------|--|
| Parenteral compared to no parenteral agent for M kansasii |                                                                                                                                                                                                                                                                                                                                                                                                                           |                                                                                                                                                                                                                                                                                                                                                                                                                                                                                                                                                                                                                                                                                                                                              |                                                           |                               |                                 |  |  |  |          |                                        |  |                          |                              |                                 |                               |                      |             |              |   |   |                            |                         |       |                |            |            |                               |                         |  |
| Outcomes                                                  | Anticipated absolute effects* (95% CI)                                                                                                                                                                                                                                                                                                                                                                                    |                                                                                                                                                                                                                                                                                                                                                                                                                                                                                                                                                                                                                                                                                                                                              | Relative effect (95% CI)                                  | Nº of participants (studies)  | Quality of the evidence (GRADE) |  |  |  |          |                                        |  |                          |                              |                                 |                               |                      |             |              |   |   |                            |                         |       |                |            |            |                               |                         |  |
|                                                           | Risk with no parenteral agent                                                                                                                                                                                                                                                                                                                                                                                             | Risk with Parenteral                                                                                                                                                                                                                                                                                                                                                                                                                                                                                                                                                                                                                                                                                                                         |                                                           |                               |                                 |  |  |  |          |                                        |  |                          |                              |                                 |                               |                      |             |              |   |   |                            |                         |       |                |            |            |                               |                         |  |
| Cure of NTM                                               | 8/10 (80.0%)                                                                                                                                                                                                                                                                                                                                                                                                              | -                                                                                                                                                                                                                                                                                                                                                                                                                                                                                                                                                                                                                                                                                                                                            | -                                                         | 10 (1 observational study)    | ⊕○○○<br>VERY LOW<br>1,2         |  |  |  |          |                                        |  |                          |                              |                                 |                               |                      |             |              |   |   |                            |                         |       |                |            |            |                               |                         |  |
| Death                                                     | 30/121 (24.8%)                                                                                                                                                                                                                                                                                                                                                                                                            | not pooled                                                                                                                                                                                                                                                                                                                                                                                                                                                                                                                                                                                                                                                                                                                                   | not pooled                                                | 121 (2 observational studies) | ⊕○○○<br>VERY LOW<br>1,2         |  |  |  |          |                                        |  |                          |                              |                                 |                               |                      |             |              |   |   |                            |                         |       |                |            |            |                               |                         |  |



|                                                     |               |            |            |                               |                         |
|-----------------------------------------------------|---------------|------------|------------|-------------------------------|-------------------------|
| Recurrence (relapse)                                | 6/115 (5.2%)  | not pooled | not pooled | 115 (2 observational studies) | ⊕○○○<br>VERY LOW<br>1,2 |
| Culture Conversion                                  | 42/44 (95.5%) | not pooled | not pooled | 44 (2 observational studies)  | ⊕○○○<br>VERY LOW<br>1,2 |
| Any adverse effect                                  | 11/75 (14.7%) | -          | -          | 75 (1 observational study)    | ⊕○○○<br>VERY LOW<br>1,2 |
| Serious Adverse Effect                              | 0/75 (0.0%)   | -          | -          | 75 (1 observational study)    | ⊕○○○<br>VERY LOW<br>1,2 |
| Withdrawal owing to adverse effects                 | 7/75 (9.3%)   | -          | -          | 75 (1 observational study)    | ⊕○○○<br>VERY LOW<br>1,2 |
| Quality of Life - not measured                      | -             | -          | -          | -                             | -                       |
| Development of Antibiotic Resistance - not measured | -             | -          | -          | -                             | -                       |

|                    |                                                                                                                                                                                                                                                                                                                                                                                                                                 |                                      |                                                                                                     |
|--------------------|---------------------------------------------------------------------------------------------------------------------------------------------------------------------------------------------------------------------------------------------------------------------------------------------------------------------------------------------------------------------------------------------------------------------------------|--------------------------------------|-----------------------------------------------------------------------------------------------------|
| RESOURCES REQUIRED | <p><b>How large are the resource requirements (costs)?</b></p> <ul style="list-style-type: none"> <li>○ Large costs</li> <li>● Moderate costs</li> <li>○ Negligible costs and savings</li> <li>○ Moderate savings</li> <li>○ Large savings</li> <li>○ Varies</li> <li>○ Don't know</li> </ul>                                                                                                                                   | No research evidence was identified. |                                                                                                     |
| COST EFFECTIVENESS | <p><b>Does the cost-effectiveness of the intervention favor the intervention or the comparison?</b></p> <ul style="list-style-type: none"> <li>○ Favors the comparison</li> <li>○ Probably favors the comparison</li> <li>● Does not favor either the intervention or the comparison</li> <li>○ Probably favors the intervention</li> <li>○ Favors the intervention</li> <li>○ Varies</li> <li>○ No included studies</li> </ul> | No research evidence was identified. |                                                                                                     |
| EQUITY             | <p><b>What would be the impact on health equity?</b></p> <ul style="list-style-type: none"> <li>○ Reduced</li> <li>● Probably reduced</li> <li>○ Probably no impact</li> <li>○ Probably increased</li> <li>○ Increased</li> <li>○ Varies</li> <li>○ Don't know</li> </ul>                                                                                                                                                       | No research evidence was identified. | In some settings, parenteral may only be available to select patients based on financial resources. |

|               |                                                                                                                                                                                                                         |                                      |  |
|---------------|-------------------------------------------------------------------------------------------------------------------------------------------------------------------------------------------------------------------------|--------------------------------------|--|
| ACCEPTABILITY | <b>Is the intervention acceptable to key stakeholders?</b> <ul style="list-style-type: none"> <li>○ No</li> <li>○ Probably no</li> <li>● Probably yes</li> <li>○ Yes</li> <li>○ Varies</li> <li>○ Don't know</li> </ul> | No research evidence was identified. |  |
| FEASIBILITY   | <b>Is the intervention feasible to implement?</b> <ul style="list-style-type: none"> <li>○ No</li> <li>○ Probably no</li> <li>● Probably yes</li> <li>○ Yes</li> <li>○ Varies</li> <li>○ Don't know</li> </ul>          | No research evidence was identified. |  |

## Summary of judgments

|                     | JUDGEMENT |          |          |         |  |        |                     | IMPLICATIONS |
|---------------------|-----------|----------|----------|---------|--|--------|---------------------|--------------|
| DESIRABLE EFFECTS   | Trivial   | Small    | Moderate | Large   |  | Varies | Don't know          |              |
| UNDESIRABLE EFFECTS | Large     | Moderate | Small    | Trivial |  | Varies | Don't know          |              |
| CERTAINTY OF        | Very low  | Low      | Moderate | High    |  |        | No included studies |              |

|                    | JUDGEMENT                            |                                                      |                                                                 |                                         |                         |        |                     | IMPLICATIONS |
|--------------------|--------------------------------------|------------------------------------------------------|-----------------------------------------------------------------|-----------------------------------------|-------------------------|--------|---------------------|--------------|
| EVIDENCE           |                                      |                                                      |                                                                 |                                         |                         |        |                     |              |
| VALUES             | Important uncertainty or variability | <b>Possibly important uncertainty or variability</b> | Probably no important uncertainty or variability                | No important uncertainty or variability |                         |        |                     |              |
| BALANCE OF EFFECTS | Favors the comparison                | <b>Probably favors the comparison</b>                | Does not favor either the intervention or the comparison        | Probably favors the intervention        | Favors the intervention | Varies | Don't know          |              |
| RESOURCES REQUIRED | Large costs                          | <b>Moderate costs</b>                                | Negligible costs and savings                                    | Moderate savings                        | Large savings           | Varies | Don't know          |              |
| COST EFFECTIVENESS | Favors the comparison                | Probably favors the comparison                       | <b>Does not favor either the intervention or the comparison</b> | Probably favors the intervention        | Favors the intervention | Varies | No included studies |              |
| EQUITY             | Reduced                              | <b>Probably reduced</b>                              | Probably no impact                                              | Probably increased                      | Increased               | Varies | Don't know          |              |
| ACCEPTABILITY      | No                                   | Probably no                                          | <b>Probably yes</b>                                             | Yes                                     |                         | Varies | Don't know          |              |
| FEASIBILITY        | No                                   | Probably no                                          | <b>Probably yes</b>                                             | Yes                                     |                         | Varies | Don't know          |              |

## Conclusions

**In patients with rifampicin-susceptible *M. kansasii* pulmonary disease, should amikacin or streptomycin be included in the treatment regimen?**

| TYPE OF RECOMMENDATION               | Strong recommendation against the intervention                                                                                                                                                                                                                                                                                                                                                                                                                                                                                                                                                                                                                                                                    | Conditional recommendation against the intervention | Conditional recommendation for either the intervention or the comparison | Conditional recommendation for the intervention | Strong recommendation for the intervention |
|--------------------------------------|-------------------------------------------------------------------------------------------------------------------------------------------------------------------------------------------------------------------------------------------------------------------------------------------------------------------------------------------------------------------------------------------------------------------------------------------------------------------------------------------------------------------------------------------------------------------------------------------------------------------------------------------------------------------------------------------------------------------|-----------------------------------------------------|--------------------------------------------------------------------------|-------------------------------------------------|--------------------------------------------|
|                                      | ●                                                                                                                                                                                                                                                                                                                                                                                                                                                                                                                                                                                                                                                                                                                 | ○                                                   | ○                                                                        | ○                                               | ○                                          |
| <b>RECOMMENDATION</b>                | <p>We suggest that neither amikacin nor streptomycin be used routinely for treating patients with <i>M. kansasii</i> pulmonary disease (Conditional recommendation, very low confidence in estimates of effect). (10 Strong, 5 Conditional, 3 Abstain)</p> <p>The panel members voted for a strong recommendation against the intervention despite a very low confidence in estimate of effect.</p>                                                                                                                                                                                                                                                                                                               |                                                     |                                                                          |                                                 |                                            |
| <b>JUSTIFICATION</b>                 | <p>Treatment outcomes in <i>M. kansasii</i> pulmonary disease are very good when using a rifamycin-based regimen with ethambutol and a second companion drug, either isoniazid or a macrolide.</p> <p>Unless the severity of the disease warrants intravenous therapy, <i>M. kansasii</i> can be treated with a rifamycin-based combination of 3 orally available drugs.</p> <p>Given generally high rates of culture conversion and treatment success observed with oral regimens for <i>M. kansasii</i> and the high risk of adverse effects associated with amikacin and streptomycin, the committee felt strongly that parenteral agents should not be used as first-line therapy for <i>M. kansasii</i>.</p> |                                                     |                                                                          |                                                 |                                            |
| <b>SUBGROUP CONSIDERATIONS</b>       |                                                                                                                                                                                                                                                                                                                                                                                                                                                                                                                                                                                                                                                                                                                   |                                                     |                                                                          |                                                 |                                            |
| <b>IMPLEMENTATION CONSIDERATIONS</b> |                                                                                                                                                                                                                                                                                                                                                                                                                                                                                                                                                                                                                                                                                                                   |                                                     |                                                                          |                                                 |                                            |
| <b>MONITORING AND EVALUATION</b>     |                                                                                                                                                                                                                                                                                                                                                                                                                                                                                                                                                                                                                                                                                                                   |                                                     |                                                                          |                                                 |                                            |
| <b>RESEARCH PRIORITIES</b>           |                                                                                                                                                                                                                                                                                                                                                                                                                                                                                                                                                                                                                                                                                                                   |                                                     |                                                                          |                                                 |                                            |

### Table E4.12. Question XII

|                                                                                                                                                                                          |                                                                                                                                                    |
|------------------------------------------------------------------------------------------------------------------------------------------------------------------------------------------|----------------------------------------------------------------------------------------------------------------------------------------------------|
| In patients with rifampicin susceptible <i>M. kansasii</i> pulmonary disease, should a treatment regimen that includes a fluoroquinolone or a regimen without a fluoroquinolone be used? |                                                                                                                                                    |
| POPULATION:                                                                                                                                                                              | M kansasii pulmonary infection                                                                                                                     |
| INTERVENTION:                                                                                                                                                                            | a regimen with a fluoroquinolone                                                                                                                   |
| COMPARISON:                                                                                                                                                                              | a regimen without a fluoroquinolone                                                                                                                |
| MAIN OUTCOMES:                                                                                                                                                                           | Cure of NTM Disease; Development of antibiotic resistance; Recurrence (relapse); Quality of Life; Culture Conversion; Death; Adverse drug effects; |

### Assessment

|                   | JUDGEMENT                                                                                                                                          | RESEARCH EVIDENCE                                                            |                                        |                          |                          |                              | ADDITIONAL CONSIDERATIONS                                                                                                              |
|-------------------|----------------------------------------------------------------------------------------------------------------------------------------------------|------------------------------------------------------------------------------|----------------------------------------|--------------------------|--------------------------|------------------------------|----------------------------------------------------------------------------------------------------------------------------------------|
| DESIRABLE EFFECTS | <b>How substantial are the desirable anticipated effects?</b><br><br>○ Trivial<br>○ Small<br>○ Moderate<br>○ Large<br><br>○ Varies<br>● Don't know | <b>Fluoroquinolone compared to no fluoroquinolone for <i>M. kansasii</i></b> |                                        |                          |                          |                              | The use of a fluoroquinolone (or a macrolide) means that INH can be dropped from the regimen with the attendant risk for INH toxicity. |
|                   |                                                                                                                                                    | Outcomes                                                                     | Anticipated absolute effects* (95% CI) |                          | Relative effect (95% CI) | Nº of participants (studies) | Quality of the evidence (GRADE)                                                                                                        |
|                   |                                                                                                                                                    |                                                                              | Risk with no Fluoroquinolone           | Risk with Fluorquinolone |                          |                              |                                                                                                                                        |

|                                                     |                                                                                                                                                                                                                                                                                                                                                                           |                                                                                                                                                                                                                                                                                                                                                                                                                                                                                                                                                                                                                                                                                                                                                           |                                    |   |   |   |   |   |                                                     |   |   |   |   |   |                                     |   |   |   |   |   |                                |   |   |   |   |   |                                   |   |   |   |   |   |                      |   |   |   |   |   |                                     |   |   |   |   |   |  |
|-----------------------------------------------------|---------------------------------------------------------------------------------------------------------------------------------------------------------------------------------------------------------------------------------------------------------------------------------------------------------------------------------------------------------------------------|-----------------------------------------------------------------------------------------------------------------------------------------------------------------------------------------------------------------------------------------------------------------------------------------------------------------------------------------------------------------------------------------------------------------------------------------------------------------------------------------------------------------------------------------------------------------------------------------------------------------------------------------------------------------------------------------------------------------------------------------------------------|------------------------------------|---|---|---|---|---|-----------------------------------------------------|---|---|---|---|---|-------------------------------------|---|---|---|---|---|--------------------------------|---|---|---|---|---|-----------------------------------|---|---|---|---|---|----------------------|---|---|---|---|---|-------------------------------------|---|---|---|---|---|--|
| UNDESIRABLE EFFECTS                                 | <p><b>How substantial are the undesirable anticipated effects?</b></p> <ul style="list-style-type: none"><li>○ Large</li><li>○ Moderate</li><li>○ Small</li><li>○ Trivial</li><li>○ Varies</li><li>● Don't know</li></ul>                                                                                                                                                 | <table><tr><td>Cure of NTM Disease - not measured</td><td>-</td><td>-</td><td>-</td><td>-</td><td>-</td></tr><tr><td>Development of antibiotic resistance - not measured</td><td>-</td><td>-</td><td>-</td><td>-</td><td>-</td></tr><tr><td>Recurrence (relapse) - not measured</td><td>-</td><td>-</td><td>-</td><td>-</td><td>-</td></tr><tr><td>Quality of Life - not measured</td><td>-</td><td>-</td><td>-</td><td>-</td><td>-</td></tr><tr><td>Culture Conversion - not measured</td><td>-</td><td>-</td><td>-</td><td>-</td><td>-</td></tr><tr><td>Death - not measured</td><td>-</td><td>-</td><td>-</td><td>-</td><td>-</td></tr><tr><td>Adverse drug effects - not measured</td><td>-</td><td>-</td><td>-</td><td>-</td><td>-</td></tr></table> | Cure of NTM Disease - not measured | - | - | - | - | - | Development of antibiotic resistance - not measured | - | - | - | - | - | Recurrence (relapse) - not measured | - | - | - | - | - | Quality of Life - not measured | - | - | - | - | - | Culture Conversion - not measured | - | - | - | - | - | Death - not measured | - | - | - | - | - | Adverse drug effects - not measured | - | - | - | - | - |  |
| Cure of NTM Disease - not measured                  | -                                                                                                                                                                                                                                                                                                                                                                         | -                                                                                                                                                                                                                                                                                                                                                                                                                                                                                                                                                                                                                                                                                                                                                         | -                                  | - | - |   |   |   |                                                     |   |   |   |   |   |                                     |   |   |   |   |   |                                |   |   |   |   |   |                                   |   |   |   |   |   |                      |   |   |   |   |   |                                     |   |   |   |   |   |  |
| Development of antibiotic resistance - not measured | -                                                                                                                                                                                                                                                                                                                                                                         | -                                                                                                                                                                                                                                                                                                                                                                                                                                                                                                                                                                                                                                                                                                                                                         | -                                  | - | - |   |   |   |                                                     |   |   |   |   |   |                                     |   |   |   |   |   |                                |   |   |   |   |   |                                   |   |   |   |   |   |                      |   |   |   |   |   |                                     |   |   |   |   |   |  |
| Recurrence (relapse) - not measured                 | -                                                                                                                                                                                                                                                                                                                                                                         | -                                                                                                                                                                                                                                                                                                                                                                                                                                                                                                                                                                                                                                                                                                                                                         | -                                  | - | - |   |   |   |                                                     |   |   |   |   |   |                                     |   |   |   |   |   |                                |   |   |   |   |   |                                   |   |   |   |   |   |                      |   |   |   |   |   |                                     |   |   |   |   |   |  |
| Quality of Life - not measured                      | -                                                                                                                                                                                                                                                                                                                                                                         | -                                                                                                                                                                                                                                                                                                                                                                                                                                                                                                                                                                                                                                                                                                                                                         | -                                  | - | - |   |   |   |                                                     |   |   |   |   |   |                                     |   |   |   |   |   |                                |   |   |   |   |   |                                   |   |   |   |   |   |                      |   |   |   |   |   |                                     |   |   |   |   |   |  |
| Culture Conversion - not measured                   | -                                                                                                                                                                                                                                                                                                                                                                         | -                                                                                                                                                                                                                                                                                                                                                                                                                                                                                                                                                                                                                                                                                                                                                         | -                                  | - | - |   |   |   |                                                     |   |   |   |   |   |                                     |   |   |   |   |   |                                |   |   |   |   |   |                                   |   |   |   |   |   |                      |   |   |   |   |   |                                     |   |   |   |   |   |  |
| Death - not measured                                | -                                                                                                                                                                                                                                                                                                                                                                         | -                                                                                                                                                                                                                                                                                                                                                                                                                                                                                                                                                                                                                                                                                                                                                         | -                                  | - | - |   |   |   |                                                     |   |   |   |   |   |                                     |   |   |   |   |   |                                |   |   |   |   |   |                                   |   |   |   |   |   |                      |   |   |   |   |   |                                     |   |   |   |   |   |  |
| Adverse drug effects - not measured                 | -                                                                                                                                                                                                                                                                                                                                                                         | -                                                                                                                                                                                                                                                                                                                                                                                                                                                                                                                                                                                                                                                                                                                                                         | -                                  | - | - |   |   |   |                                                     |   |   |   |   |   |                                     |   |   |   |   |   |                                |   |   |   |   |   |                                   |   |   |   |   |   |                      |   |   |   |   |   |                                     |   |   |   |   |   |  |
| CERTAINTY OF EVIDENCE                               | <p><b>What is the overall certainty of the evidence of effects?</b></p> <ul style="list-style-type: none"><li>○ Very low</li><li>○ Low</li><li>○ Moderate</li><li>○ High</li><li>● No included studies</li></ul>                                                                                                                                                          | No research evidence was identified.                                                                                                                                                                                                                                                                                                                                                                                                                                                                                                                                                                                                                                                                                                                      |                                    |   |   |   |   |   |                                                     |   |   |   |   |   |                                     |   |   |   |   |   |                                |   |   |   |   |   |                                   |   |   |   |   |   |                      |   |   |   |   |   |                                     |   |   |   |   |   |  |
| VALUES                                              | <p><b>Is there important uncertainty about or variability in how much people value the main outcomes?</b></p> <ul style="list-style-type: none"><li>○ Important uncertainty or variability</li><li>● Possibly important uncertainty or variability</li><li>○ Probably no important uncertainty or variability</li><li>○ No important uncertainty or variability</li></ul> | <p>Values and preferences:</p> <p>Three relevant studies were identified that provide data on patient values and preferences:</p> <p>Mehta and Marras, 2011 evaluated the impact of pulmonary NTM on health-related quality of life. In this study, patients with pulmonary NTM had significantly impaired health-related quality of life with two QOL measures significantly lower than historical normal controls. Multivariable analysis showed an association between QOL scores and lung function</p> <p>Hong, et al, 2014 also evaluated the impact of pulmonary NTM on health-related quality of</p>                                                                                                                                               |                                    |   |   |   |   |   |                                                     |   |   |   |   |   |                                     |   |   |   |   |   |                                |   |   |   |   |   |                                   |   |   |   |   |   |                      |   |   |   |   |   |                                     |   |   |   |   |   |  |

life. This was a direct comparison between patients with NTM disease and healthy subjects and found patients with NTM reported more health status issues and anxiety/depression issues than healthy controls. Lung function was also independently associated with QOL scores.

Czaja, et al 2015 evaluated change in quality of life in response to various treatment regimens for *M. abscessus* (many patients had coinfection with MAC or Pseudomonas). Mean QOL score was significantly improved after treatment at 3, 6, 12, and 24 months.

**Does the balance between desirable and undesirable effects favor the intervention or the comparison?**

- Favors the comparison
- Probably favors the comparison
- Does not favor either the intervention or the comparison
- Probably favors the intervention
- Favors the intervention
- Varies
- Don't know

**Fluorquinolone compared to no Fluoroquinolone for M kansasii**

| Outcomes                                            | Anticipated absolute effects* (95% CI) |                           | Relative effect (95% CI) | Nº of participants (studies) | Quality of the evidence (GRADE) |
|-----------------------------------------------------|----------------------------------------|---------------------------|--------------------------|------------------------------|---------------------------------|
|                                                     | Risk with no Fluoroquinolone           | Risk with Fluoroquinolone |                          |                              |                                 |
| Cure of NTM Disease - not measured                  | -                                      | -                         | -                        | -                            | -                               |
| Development of antibiotic resistance - not measured | -                                      | -                         | -                        | -                            | -                               |
| Recurrence (relapse) - not                          | -                                      | -                         | -                        | -                            | -                               |



|                                     |                                                                                                                                                                                                                                                                                                                                                                                                                         |                                                                                                                                                                                                                                                                                                                                                                                                                                         |          |   |  |  |  |                                |   |  |   |   |                                   |   |  |   |   |                      |   |  |   |   |                                     |   |  |   |   |  |
|-------------------------------------|-------------------------------------------------------------------------------------------------------------------------------------------------------------------------------------------------------------------------------------------------------------------------------------------------------------------------------------------------------------------------------------------------------------------------|-----------------------------------------------------------------------------------------------------------------------------------------------------------------------------------------------------------------------------------------------------------------------------------------------------------------------------------------------------------------------------------------------------------------------------------------|----------|---|--|--|--|--------------------------------|---|--|---|---|-----------------------------------|---|--|---|---|----------------------|---|--|---|---|-------------------------------------|---|--|---|---|--|
|                                     |                                                                                                                                                                                                                                                                                                                                                                                                                         | <table><tr><td>measured</td><td></td><td></td><td></td><td></td></tr><tr><td>Quality of Life - not measured</td><td>-</td><td></td><td>-</td><td>-</td></tr><tr><td>Culture Conversion - not measured</td><td>-</td><td></td><td>-</td><td>-</td></tr><tr><td>Death - not measured</td><td>-</td><td></td><td>-</td><td>-</td></tr><tr><td>Adverse drug effects - not measured</td><td>-</td><td></td><td>-</td><td>-</td></tr></table> | measured |   |  |  |  | Quality of Life - not measured | - |  | - | - | Culture Conversion - not measured | - |  | - | - | Death - not measured | - |  | - | - | Adverse drug effects - not measured | - |  | - | - |  |
| measured                            |                                                                                                                                                                                                                                                                                                                                                                                                                         |                                                                                                                                                                                                                                                                                                                                                                                                                                         |          |   |  |  |  |                                |   |  |   |   |                                   |   |  |   |   |                      |   |  |   |   |                                     |   |  |   |   |  |
| Quality of Life - not measured      | -                                                                                                                                                                                                                                                                                                                                                                                                                       |                                                                                                                                                                                                                                                                                                                                                                                                                                         | -        | - |  |  |  |                                |   |  |   |   |                                   |   |  |   |   |                      |   |  |   |   |                                     |   |  |   |   |  |
| Culture Conversion - not measured   | -                                                                                                                                                                                                                                                                                                                                                                                                                       |                                                                                                                                                                                                                                                                                                                                                                                                                                         | -        | - |  |  |  |                                |   |  |   |   |                                   |   |  |   |   |                      |   |  |   |   |                                     |   |  |   |   |  |
| Death - not measured                | -                                                                                                                                                                                                                                                                                                                                                                                                                       |                                                                                                                                                                                                                                                                                                                                                                                                                                         | -        | - |  |  |  |                                |   |  |   |   |                                   |   |  |   |   |                      |   |  |   |   |                                     |   |  |   |   |  |
| Adverse drug effects - not measured | -                                                                                                                                                                                                                                                                                                                                                                                                                       |                                                                                                                                                                                                                                                                                                                                                                                                                                         | -        | - |  |  |  |                                |   |  |   |   |                                   |   |  |   |   |                      |   |  |   |   |                                     |   |  |   |   |  |
| RESOURCES REQUIRED                  | <p><b>How large are the resource requirements (costs)?</b></p> <ul style="list-style-type: none"><li>○ Large costs</li><li>○ Moderate costs</li><li>○ Negligible costs and savings</li><li>○ Moderate savings</li><li>○ Large savings</li><li>● Varies</li><li>○ Don't know</li></ul>                                                                                                                                   | No research evidence was identified.                                                                                                                                                                                                                                                                                                                                                                                                    |          |   |  |  |  |                                |   |  |   |   |                                   |   |  |   |   |                      |   |  |   |   |                                     |   |  |   |   |  |
| COST EFFECTIVENESS                  | <p><b>Does the cost-effectiveness of the intervention favor the intervention or the comparison?</b></p> <ul style="list-style-type: none"><li>○ Favors the comparison</li><li>○ Probably favors the comparison</li><li>○ Does not favor either the intervention or the comparison</li><li>○ Probably favors the intervention</li><li>○ Favors the intervention</li><li>● Varies</li><li>○ No included studies</li></ul> | No research evidence was identified.                                                                                                                                                                                                                                                                                                                                                                                                    |          |   |  |  |  |                                |   |  |   |   |                                   |   |  |   |   |                      |   |  |   |   |                                     |   |  |   |   |  |
| EQUITY                              | <p><b>What would be the impact on health</b></p>                                                                                                                                                                                                                                                                                                                                                                        | No research evidence was identified.                                                                                                                                                                                                                                                                                                                                                                                                    |          |   |  |  |  |                                |   |  |   |   |                                   |   |  |   |   |                      |   |  |   |   |                                     |   |  |   |   |  |

|               |                                                                                                                                                                                                                                 |                                      |  |
|---------------|---------------------------------------------------------------------------------------------------------------------------------------------------------------------------------------------------------------------------------|--------------------------------------|--|
|               | <b>equity?</b> <ul style="list-style-type: none"> <li>○ Reduced</li> <li>○ Probably reduced</li> <li>● Probably no impact</li> <li>○ Probably increased</li> <li>○ Increased</li> <li>○ Varies</li> <li>○ Don't know</li> </ul> |                                      |  |
| ACCEPTABILITY | <b>Is the intervention acceptable to key stakeholders?</b> <ul style="list-style-type: none"> <li>○ No</li> <li>○ Probably no</li> <li>● Probably yes</li> <li>○ Yes</li> <li>○ Varies</li> <li>○ Don't know</li> </ul>         | No research evidence was identified. |  |
| FEASIBILITY   | <b>Is the intervention feasible to implement?</b> <ul style="list-style-type: none"> <li>○ No</li> <li>○ Probably no</li> <li>● Probably yes</li> <li>○ Yes</li> <li>○ Varies</li> <li>○ Don't know</li> </ul>                  | No research evidence was identified. |  |

## Summary of judgments

| JUDGEMENT | IMPLICATIONS |
|-----------|--------------|
|-----------|--------------|

|                              | JUDGEMENT                            |                                               |                                                          |                                         |                         |        |                     | IMPLICATIONS |
|------------------------------|--------------------------------------|-----------------------------------------------|----------------------------------------------------------|-----------------------------------------|-------------------------|--------|---------------------|--------------|
| <b>DESIRABLE EFFECTS</b>     | Trivial                              | Small                                         | Moderate                                                 | Large                                   |                         | Varies | Don't know          |              |
| <b>UNDESIRABLE EFFECTS</b>   | Large                                | Moderate                                      | Small                                                    | Trivial                                 |                         | Varies | Don't know          |              |
| <b>CERTAINTY OF EVIDENCE</b> | Very low                             | Low                                           | Moderate                                                 | High                                    |                         |        | No included studies |              |
| <b>VALUES</b>                | Important uncertainty or variability | Possibly important uncertainty or variability | Probably no important uncertainty or variability         | No important uncertainty or variability |                         |        |                     |              |
| <b>BALANCE OF EFFECTS</b>    | Favors the comparison                | Probably favors the comparison                | Does not favor either the intervention or the comparison | Probably favors the intervention        | Favors the intervention | Varies | Don't know          |              |
| <b>RESOURCES REQUIRED</b>    | Large costs                          | Moderate costs                                | Negligible costs and savings                             | Moderate savings                        | Large savings           | Varies | Don't know          |              |
| <b>COST EFFECTIVENESS</b>    | Favors the comparison                | Probably favors the comparison                | Does not favor either the intervention or the comparison | Probably favors the intervention        | Favors the intervention | Varies | No included studies |              |
| <b>EQUITY</b>                | Reduced                              | Probably reduced                              | Probably no impact                                       | Probably increased                      | Increased               | Varies | Don't know          |              |
| <b>ACCEPTABILITY</b>         | No                                   | Probably no                                   | Probably yes                                             | Yes                                     |                         | Varies | Don't know          |              |
| <b>FEASIBILITY</b>           | No                                   | Probably no                                   | Probably yes                                             | Yes                                     |                         | Varies | Don't know          |              |

## Conclusions

**Should a regimen with a fluoroquinolone vs. a regimen without a fluoroquinolone be used for *M. kansasii* pulmonary infection?**

| TYPE OF RECOMMENDATION  | Strong recommendation against the intervention                                                                                                                                                                                                                                                                                                                                                                                                                                                                                                                                                                                                                                                                                             | Conditional recommendation against the intervention | Conditional recommendation for either the intervention or the comparison | Conditional recommendation for the intervention | Strong recommendation for the intervention |
|-------------------------|--------------------------------------------------------------------------------------------------------------------------------------------------------------------------------------------------------------------------------------------------------------------------------------------------------------------------------------------------------------------------------------------------------------------------------------------------------------------------------------------------------------------------------------------------------------------------------------------------------------------------------------------------------------------------------------------------------------------------------------------|-----------------------------------------------------|--------------------------------------------------------------------------|-------------------------------------------------|--------------------------------------------|
|                         | ○                                                                                                                                                                                                                                                                                                                                                                                                                                                                                                                                                                                                                                                                                                                                          | ●                                                   | ○                                                                        | ○                                               | ○                                          |
| RECOMMENDATION          | <p>In patients with rifampicin susceptible <i>M. kansasii</i> pulmonary disease, we suggest using a regimen of rifampicin, ethambutol, and either isoniazid or macrolide instead of a fluoroquinolone (conditional recommendation, very low confidence in estimates of effect).</p> <p>In patients with rifampicin resistant <i>M. kansasii</i> or intolerance to one of the first line antibiotics we suggest a fluoroquinolone (e.g., moxifloxacin) be used as part of a second-line regimen (conditional recommendation, very low confidence in estimates of effect).</p> <p>The panel members voted unanimously for a conditional recommendation against the intervention.</p>                                                         |                                                     |                                                                          |                                                 |                                            |
| JUSTIFICATION           | <p>Treatment success of <i>M. kansasii</i> pulmonary disease with a rifamycin-based drug regimen is excellent. The optimal choice of companion drugs is not clear. While ethambutol is usually the preferred companion drug, the choice of the second companion drug may be isoniazid or a macrolide. Which of these drugs is superior for the treatment of <i>M. kansasii</i> is unclear at present. As there is more experience and better evidence for treatment regimens that include isoniazid or a macrolide as the second companion drug, these drugs should be the preferred choice. Fluoroquinolones have excellent in vitro activity but there are no treatment studies using these for the treatment of <i>M. kansasii</i>.</p> |                                                     |                                                                          |                                                 |                                            |
| SUBGROUP CONSIDERATIONS |                                                                                                                                                                                                                                                                                                                                                                                                                                                                                                                                                                                                                                                                                                                                            |                                                     |                                                                          |                                                 |                                            |

|                                      |                                                                                              |
|--------------------------------------|----------------------------------------------------------------------------------------------|
| <b>IMPLEMENTATION CONSIDERATIONS</b> |                                                                                              |
| <b>MONITORING AND EVALUATION</b>     |                                                                                              |
| <b>RESEARCH PRIORITIES</b>           | Randomized clinical trials comparing regimens with macrolides to regimens with moxifloxacin. |

# Table E4.13. Question XIII

|                                                                                                                                                 |                                                                                                                                                                                                        |
|-------------------------------------------------------------------------------------------------------------------------------------------------|--------------------------------------------------------------------------------------------------------------------------------------------------------------------------------------------------------|
| In patients with rifampicin susceptible <i>M. kansasii</i> pulmonary disease, should a three times per week or daily treatment regimen be used? |                                                                                                                                                                                                        |
| POPULATION:                                                                                                                                     | M kansasii pulmonary infection                                                                                                                                                                         |
| INTERVENTION:                                                                                                                                   | a three times per week treatment regimen                                                                                                                                                               |
| COMPARISON:                                                                                                                                     | a daily treatment regimen                                                                                                                                                                              |
| MAIN OUTCOMES:                                                                                                                                  | Cure of NTM; Death; Recurrence (relapse); Culture Conversion; Any Adverse Effect; Serious adverse effects; Withdrawal owing to adverse effects; Quality of Life; Development of antibiotic resistance; |

## Assessment

|                   | JUDGEMENT                                                                                                                                          | RESEARCH EVIDENCE                                      |                                        |                          |                          |                              | ADDITIONAL CONSIDERATIONS       |
|-------------------|----------------------------------------------------------------------------------------------------------------------------------------------------|--------------------------------------------------------|----------------------------------------|--------------------------|--------------------------|------------------------------|---------------------------------|
| DESIRABLE EFFECTS | <b>How substantial are the desirable anticipated effects?</b><br><br>○ Trivial<br>● Small<br>○ Moderate<br>○ Large<br><br>○ Varies<br>○ Don't know | <b>M kansasii TIW compared to daily for M kansasii</b> |                                        |                          |                          |                              |                                 |
|                   |                                                                                                                                                    | Outcomes                                               | Anticipated absolute effects* (95% CI) |                          | Relative effect (95% CI) | Nº of participants (studies) | Quality of the evidence (GRADE) |
|                   |                                                                                                                                                    |                                                        | Risk with daily                        | Risk with M kansasii TIW |                          |                              |                                 |

**How substantial are the undesirable anticipated effects?**

- Large
- Moderate
- Small
- Trivial
- Varies
- Don't know

|                                                           |                  |                    |                  |                                     |                           |
|-----------------------------------------------------------|------------------|--------------------|------------------|-------------------------------------|---------------------------|
| Cure of NTM                                               | 0/0              | 115/182<br>(63.2%) | not pooled       | 182<br>(2 observational<br>studies) | ⊕○○○<br>VERY LOW<br>1,2,3 |
| Death                                                     | 0/18 (0.0%)      | 39/229<br>(17.0%)  | not pooled       | 247<br>(3 observational<br>studies) | ⊕○○○<br>VERY LOW 2,3      |
| Recurrence (relapse)                                      | 0/14<br>(0.0%)   | 16/178<br>(9.0%)   | not pooled       | 192<br>(3 observational<br>studies) | ⊕○○○<br>VERY LOW 1,3      |
| Culture Conversion                                        | 17/18<br>(94.4%) | 238/257<br>(92.6%) | not pooled       | 275<br>(4 observational<br>studies) | ⊕○○○<br>VERY LOW 1,3      |
| Any Adverse Effect                                        | 0/18 (0.0%)      | 0/0                | not<br>estimable | 18<br>(1 observational<br>study)    | ⊕○○○<br>VERY LOW 1,3      |
| Serious adverse effects                                   | 0/18 (0.0%)      | 0/28 (0.0%)        | not pooled       | 46<br>(2 observational<br>studies)  | ⊕○○○<br>VERY LOW 1,3      |
| Withdrawal owing to<br>adverse effects                    | 0/18<br>(0.0%)   | 0/28 (0.0%)        | not pooled       | 46<br>(2 observational<br>studies)  | ⊕○○○<br>VERY LOW 1,3      |
| Quality of Life - not<br>measured                         | -                | -                  | -                | -                                   | -                         |
| Development of antibiotic<br>resistance - not<br>measured | -                | -                  | -                | -                                   | -                         |

**What is the overall certainty of the evidence of effects?**

- Very low
- Low
- Moderate
- High
- No included studies

**The relative importance or values of the main outcomes of interest:**

| Outcome                              | Relative importance | Certainty of the evidence (GRADE) |
|--------------------------------------|---------------------|-----------------------------------|
| Cure of NTM                          | CRITICAL            | ⊕○○○<br>VERY LOW                  |
| Death                                | CRITICAL            | ⊕○○○<br>VERY LOW                  |
| Recurrence (relapse)                 | CRITICAL            | ⊕○○○<br>VERY LOW                  |
| Culture Conversion                   | CRITICAL            | ⊕○○○<br>VERY LOW                  |
| Any Adverse Effect                   | CRITICAL            | ⊕○○○<br>VERY LOW                  |
| Serious adverse effects              | CRITICAL            | ⊕○○○<br>VERY LOW                  |
| Withdrawal owing to adverse effects  | CRITICAL            | ⊕○○○<br>VERY LOW                  |
| Quality of Life                      | CRITICAL            | -                                 |
| Development of antibiotic resistance | CRITICAL            | -                                 |



**Is there important uncertainty about or variability in how much people value the main outcomes?**

- Important uncertainty or variability
- Possibly important uncertainty or variability
- Probably no important uncertainty or variability
- No important uncertainty or variability

Values and preferences:

Three relevant studies were identified that provide data on patient values and preferences:

Mehta and Marras, 2011 evaluated the impact of pulmonary NTM on health-related quality of life. In this study, patients with pulmonary NTM had significantly impaired health-related quality of life with two QOL measures significantly lower than historical normal controls. Multivariable analysis showed an association between QOL scores and lung function

Hong, et al, 2014 also evaluated the impact of pulmonary NTM on health-related quality of life. This was a direct comparison between patients with NTM disease and healthy subjects and found patients with NTM reported more health status issues and anxiety/depression issues than healthy controls. Lung function was also independently associated with QOL scores.

Czaja, et al 2015 evaluated change in quality of life in response to various treatment regimens for *M. abscessus* (many patients had coinfection with MAC or *Pseudomonas*). Mean QOL score was significantly improved after treatment at 3, 6, 12, and 24 months.

| BALANCE OF EFFECTS | <div>Does the balance between desirable and undesirable effects favor the intervention or the comparison?</div> <div><div><div>○ Favors the comparison</div><div>○ Probably favors the comparison</div><div>● Does not favor either the intervention or the comparison</div><div>○ Probably favors the intervention</div><div>○ Favors the intervention</div></div><div><div>○ Varies</div><div>○ Don't know</div></div></div> | <div>M kansasii TIW compared to daily for M kansasii</div> <table><tr><th rowspan="2">Outcomes</th><th colspan="2">Anticipated absolute effects* (95% CI)</th><th rowspan="2">Relative effect (95% CI)</th><th rowspan="2">Nº of participants (studies)</th><th rowspan="2">Quality of the evidence (GRADE)</th></tr><tr><th>Risk with daily</th><th>Risk with M kansasii TIW</th></tr><tr><td>Cure of NTM</td><td>0/0</td><td>115/182 (63.2%)</td><td>not pooled</td><td>182 (2 observational studies)</td><td>⊕○○○<br/>VERY LOW<br/>1,2,3</td></tr></table> | Outcomes   | Anticipated absolute effects* (95% CI) |                              | Relative effect (95% CI) | Nº of participants (studies) | Quality of the evidence (GRADE) | Risk with daily                 | Risk with M kansasii TIW | Cure of NTM | 0/0 | 115/182 (63.2%) | not pooled | 182 (2 observational studies) | ⊕○○○<br>VERY LOW<br>1,2,3 |
|--------------------|--------------------------------------------------------------------------------------------------------------------------------------------------------------------------------------------------------------------------------------------------------------------------------------------------------------------------------------------------------------------------------------------------------------------------------|---------------------------------------------------------------------------------------------------------------------------------------------------------------------------------------------------------------------------------------------------------------------------------------------------------------------------------------------------------------------------------------------------------------------------------------------------------------------------------------------------------------------------------------------------------------|------------|----------------------------------------|------------------------------|--------------------------|------------------------------|---------------------------------|---------------------------------|--------------------------|-------------|-----|-----------------|------------|-------------------------------|---------------------------|
| Outcomes           | Anticipated absolute effects* (95% CI)                                                                                                                                                                                                                                                                                                                                                                                         |                                                                                                                                                                                                                                                                                                                                                                                                                                                                                                                                                               |            | Relative effect (95% CI)               | Nº of participants (studies) |                          |                              |                                 | Quality of the evidence (GRADE) |                          |             |     |                 |            |                               |                           |
|                    | Risk with daily                                                                                                                                                                                                                                                                                                                                                                                                                | Risk with M kansasii TIW                                                                                                                                                                                                                                                                                                                                                                                                                                                                                                                                      |            |                                        |                              |                          |                              |                                 |                                 |                          |             |     |                 |            |                               |                           |
| Cure of NTM        | 0/0                                                                                                                                                                                                                                                                                                                                                                                                                            | 115/182 (63.2%)                                                                                                                                                                                                                                                                                                                                                                                                                                                                                                                                               | not pooled | 182 (2 observational studies)          | ⊕○○○<br>VERY LOW<br>1,2,3    |                          |                              |                                 |                                 |                          |             |     |                 |            |                               |                           |

|  |                                                           |                |                    |                  |                                        |                         |
|--|-----------------------------------------------------------|----------------|--------------------|------------------|----------------------------------------|-------------------------|
|  | Death                                                     | 0/18 (0.0%)    | 39/229<br>(17.0%)  | not pooled       | 247<br>(3<br>observational<br>studies) | ⊕○○○<br>VERY LOW<br>2,3 |
|  | Recurrence (relapse)                                      | 0/14 (0.0%)    | 16/178<br>(9.0%)   | not pooled       | 192<br>(3<br>observational<br>studies) | ⊕○○○<br>VERY LOW<br>1,3 |
|  | Culture Conversion                                        | 17/18 (94.4%)  | 238/257<br>(92.6%) | not pooled       | 275<br>(4<br>observational<br>studies) | ⊕○○○<br>VERY LOW<br>1,3 |
|  | Any Adverse Effect                                        | 0/18<br>(0.0%) | 0/0                | not<br>estimable | 18<br>(1<br>observational<br>study)    | ⊕○○○<br>VERY LOW<br>1,3 |
|  | Serious adverse<br>effects                                | 0/18 (0.0%)    | 0/28<br>(0.0%)     | not pooled       | 46<br>(2<br>observational<br>studies)  | ⊕○○○<br>VERY LOW<br>1,3 |
|  | Withdrawal owing to<br>adverse effects                    | 0/18 (0.0%)    | 0/28<br>(0.0%)     | not pooled       | 46<br>(2<br>observational<br>studies)  | ⊕○○○<br>VERY LOW<br>1,3 |
|  | Quality of Life - not<br>measured                         | -              | -                  | -                | -                                      | -                       |
|  | Development of<br>antibiotic resistance -<br>not measured | -              | -                  | -                | -                                      | -                       |

|                    |                                                                                                                                                                                                                                                                                                                                                                                                                                 |                                      |  |
|--------------------|---------------------------------------------------------------------------------------------------------------------------------------------------------------------------------------------------------------------------------------------------------------------------------------------------------------------------------------------------------------------------------------------------------------------------------|--------------------------------------|--|
| RESOURCES REQUIRED | <p><b>How large are the resource requirements (costs)?</b></p> <ul style="list-style-type: none"> <li>○ Large costs</li> <li>○ Moderate costs</li> <li>○ Negligible costs and savings</li> <li>● Moderate savings</li> <li>○ Large savings</li> <li>○ Varies</li> <li>○ Don't know</li> </ul>                                                                                                                                   | No research evidence was identified. |  |
| COST EFFECTIVENESS | <p><b>Does the cost-effectiveness of the intervention favor the intervention or the comparison?</b></p> <ul style="list-style-type: none"> <li>○ Favors the comparison</li> <li>○ Probably favors the comparison</li> <li>● Does not favor either the intervention or the comparison</li> <li>○ Probably favors the intervention</li> <li>○ Favors the intervention</li> <li>○ Varies</li> <li>○ No included studies</li> </ul> | No research evidence was identified. |  |
| EQUITY             | <p><b>What would be the impact on health equity?</b></p> <ul style="list-style-type: none"> <li>○ Reduced</li> <li>○ Probably reduced</li> <li>● Probably no impact</li> <li>○ Probably increased</li> <li>○ Increased</li> <li>○ Varies</li> <li>○ Don't know</li> </ul>                                                                                                                                                       | No research evidence was identified. |  |

|               |                                                                                                                                                                                                                         |                                      |  |
|---------------|-------------------------------------------------------------------------------------------------------------------------------------------------------------------------------------------------------------------------|--------------------------------------|--|
| ACCEPTABILITY | <b>Is the intervention acceptable to key stakeholders?</b> <ul style="list-style-type: none"> <li>○ No</li> <li>○ Probably no</li> <li>○ Probably yes</li> <li>○ Yes</li> <li>● Varies</li> <li>○ Don't know</li> </ul> | No research evidence was identified. |  |
| FEASIBILITY   | <b>Is the intervention feasible to implement?</b> <ul style="list-style-type: none"> <li>○ No</li> <li>○ Probably no</li> <li>● Probably yes</li> <li>○ Yes</li> <li>○ Varies</li> <li>○ Don't know</li> </ul>          | No research evidence was identified. |  |

## Summary of judgments

|                       | JUDGEMENT                |                    |                       |                             |  |        |                     | IMPLICATIONS |
|-----------------------|--------------------------|--------------------|-----------------------|-----------------------------|--|--------|---------------------|--------------|
| DESIRABLE EFFECTS     | Trivial                  | Small              | Moderate              | Large                       |  | Varies | Don't know          |              |
| UNDESIRABLE EFFECTS   | Large                    | Moderate           | Small                 | Trivial                     |  | Varies | Don't know          |              |
| CERTAINTY OF EVIDENCE | Very low                 | Low                | Moderate              | High                        |  |        | No included studies |              |
| VALUES                | Important uncertainty or | Possibly important | Probably no important | No important uncertainty or |  |        |                     |              |

|                           | JUDGEMENT             |                                   |                                                                 |                                  |                         |               |                     | IMPLICATIONS |
|---------------------------|-----------------------|-----------------------------------|-----------------------------------------------------------------|----------------------------------|-------------------------|---------------|---------------------|--------------|
|                           | variability           | <b>uncertainty or variability</b> | uncertainty or variability                                      | variability                      |                         |               |                     |              |
| <b>BALANCE OF EFFECTS</b> | Favors the comparison | Probably favors the comparison    | <b>Does not favor either the intervention or the comparison</b> | Probably favors the intervention | Favors the intervention | Varies        | Don't know          |              |
| <b>RESOURCES REQUIRED</b> | Large costs           | Moderate costs                    | Negligible costs and savings                                    | <b>Moderate savings</b>          | Large savings           | Varies        | Don't know          |              |
| <b>COST EFFECTIVENESS</b> | Favors the comparison | Probably favors the comparison    | <b>Does not favor either the intervention or the comparison</b> | Probably favors the intervention | Favors the intervention | Varies        | No included studies |              |
| <b>EQUITY</b>             | Reduced               | Probably reduced                  | <b>Probably no impact</b>                                       | Probably increased               | Increased               | Varies        | Don't know          |              |
| <b>ACCEPTABILITY</b>      | No                    | Probably no                       | Probably yes                                                    | Yes                              |                         | <b>Varies</b> | Don't know          |              |
| <b>FEASIBILITY</b>        | No                    | Probably no                       | <b>Probably yes</b>                                             | Yes                              |                         | Varies        | Don't know          |              |

## Conclusions

**In patients with rifampicin susceptible *M. kansasii* pulmonary disease, should a three times per week or daily treatment regimen be used?**

| TYPE OF RECOMMENDATION | Strong recommendation | Conditional recommendation | Conditional recommendation | Conditional recommendation | Strong recommendation |
|------------------------|-----------------------|----------------------------|----------------------------|----------------------------|-----------------------|
|------------------------|-----------------------|----------------------------|----------------------------|----------------------------|-----------------------|

|                                | against the intervention<br><br>○                                                                                                                                                                                                                                                                                                                                                                                                                                                                                                                                                                                                                                                                                                                                                                                                                                                                                                                                                                                                                                                                                                                       | against the intervention<br><br>○ | for either the intervention or the comparison<br><br>● | for the intervention<br><br>○ | for the intervention<br><br>○ |
|--------------------------------|---------------------------------------------------------------------------------------------------------------------------------------------------------------------------------------------------------------------------------------------------------------------------------------------------------------------------------------------------------------------------------------------------------------------------------------------------------------------------------------------------------------------------------------------------------------------------------------------------------------------------------------------------------------------------------------------------------------------------------------------------------------------------------------------------------------------------------------------------------------------------------------------------------------------------------------------------------------------------------------------------------------------------------------------------------------------------------------------------------------------------------------------------------|-----------------------------------|--------------------------------------------------------|-------------------------------|-------------------------------|
| <b>RECOMMENDATION</b>          | <p>In patients with nodular/bronchiectatic <i>M. kansasii</i> pulmonary disease treated with a rifampicin, ethambutol and macrolide regimen, we suggest either daily or three times weekly treatment. (conditional recommendation, very low confidence in estimates of effect).</p> <p>The panel members voted unanimously for a conditional recommendation for either the intervention or comparison.</p> <p>In patients with fibrocavitary <i>M. kansasii</i> pulmonary disease treated with a rifampicin, ethambutol and macrolide-based regimen, we suggest daily treatment as opposed to three times weekly treatment. (conditional recommendation, very low confidence in estimates of effect).</p> <p>The panel members voted unanimously for a conditional recommendation for the comparison.</p> <p>In all patients with <i>M. kansasii</i> pulmonary disease treated with an isoniazid, ethambutol and rifampicin regimen, we suggest treatment be given daily. (conditional recommendation, very low confidence in estimates of effect).</p> <p>The panel members voted unanimously for a conditional recommendation for the comparison.</p> |                                   |                                                        |                               |                               |
| <b>JUSTIFICATION</b>           | Cavitary disease has higher morbidity and mortality and warrants a more aggressive treatment approach.                                                                                                                                                                                                                                                                                                                                                                                                                                                                                                                                                                                                                                                                                                                                                                                                                                                                                                                                                                                                                                                  |                                   |                                                        |                               |                               |
| <b>SUBGROUP CONSIDERATIONS</b> |                                                                                                                                                                                                                                                                                                                                                                                                                                                                                                                                                                                                                                                                                                                                                                                                                                                                                                                                                                                                                                                                                                                                                         |                                   |                                                        |                               |                               |

|                                      |                                                                                                                                                                                                                                                                                                   |
|--------------------------------------|---------------------------------------------------------------------------------------------------------------------------------------------------------------------------------------------------------------------------------------------------------------------------------------------------|
| <b>IMPLEMENTATION CONSIDERATIONS</b> |                                                                                                                                                                                                                                                                                                   |
| <b>MONITORING AND EVALUATION</b>     |                                                                                                                                                                                                                                                                                                   |
| <b>RESEARCH PRIORITIES</b>           | <p>Randomized trial comparing three times weekly vs daily regimens in cavitary and nodular/bronchiectatic <i>M. kansasii</i>.</p> <p>Role of higher doses of antimicrobial drugs and therapeutic drug monitoring should be explored to determine whether optimizing drug levels is beneficial</p> |



Table E4.14. Question XIV

|                                                                                                                                                           |                                                                                                                                  |
|-----------------------------------------------------------------------------------------------------------------------------------------------------------|----------------------------------------------------------------------------------------------------------------------------------|
| In patients with rifampicin-susceptible <i>M. kansasii</i> pulmonary disease, should treatment be continued for less than 12 months or 12 or more months? |                                                                                                                                  |
| POPULATION:                                                                                                                                               | M kansasii pulmonary infection                                                                                                   |
| INTERVENTION:                                                                                                                                             | <12 months of treatment after culture negativity                                                                                 |
| COMPARISON:                                                                                                                                               | >/= 12 months of treatment after culture negativity                                                                              |
| MAIN OUTCOMES:                                                                                                                                            | Cure of NTM; Recurrence; Culture Conversion; Quality of Life; Development of Antibiotic Resistance; Death; Adverse Drug Effects; |

Assessment

|                   | JUDGEMENT                                                                                                                                          | RESEARCH EVIDENCE                                |                                        |                 |                    |                         | ADDITIONAL CONSIDERATIONS                                                                                                                                                                                                                                                                                          |
|-------------------|----------------------------------------------------------------------------------------------------------------------------------------------------|--------------------------------------------------|----------------------------------------|-----------------|--------------------|-------------------------|--------------------------------------------------------------------------------------------------------------------------------------------------------------------------------------------------------------------------------------------------------------------------------------------------------------------|
| DESIRABLE EFFECTS | <b>How substantial are the desirable anticipated effects?</b><br><br>○ Trivial<br>● Small<br>○ Moderate<br>○ Large<br><br>○ Varies<br>○ Don't know | <12 months compared to >12 months for M kansasii |                                        |                 |                    |                         | There are a number of studies that describe outcomes of <i>M. kansasii</i> with "short" or "long" duration of treatment, but without direct comparison. For instance, Santin, et al., published results on a 12 month treatment approach (retrospective cohort - ERJ 2009;33:148-52), reporting 6.6% relapse rate. |
|                   |                                                                                                                                                    | Outcomes                                         | Anticipated absolute effects* (95% CI) | Relative effect | Nº of participants | Quality of the evidence |                                                                                                                                                                                                                                                                                                                    |
|                   |                                                                                                                                                    |                                                  |                                        |                 |                    |                         |                                                                                                                                                                                                                                                                                                                    |

| UNDESIRABLE EFFECTS                 | <b>How substantial are the undesirable anticipated effects?</b> <ul style="list-style-type: none"><li>○ Large</li><li>○ Moderate</li><li>● Small</li><li>○ Trivial</li><li>○ Varies</li><li>○ Don't know</li></ul> | <table><tr><th></th><th>Risk with<br/>&gt;12 months</th><th>Risk with<br/>&lt;12 months</th><th>(95% CI)</th><th>(studies)</th><th>(GRADE)</th></tr><tr><td>Cure of NTM</td><td>1000 per 1000</td><td><b>1000 per 1000</b><br/>(880 to 1000)</td><td><b>RR 1.00</b><br/>(0.88 to 1.14)</td><td>28<br/>(1 RCT)</td><td>⊕⊕○○<br/>LOW <sup>1,2</sup></td></tr><tr><td>Recurrence</td><td>0 per 1000</td><td><b>0 per 1000</b><br/>(0 to 0)</td><td><b>RR 3.00</b><br/>(0.13 to 67.91)</td><td>28<br/>(1 RCT)</td><td>⊕⊕○○<br/>LOW <sup>1,2</sup></td></tr><tr><td>Culture Conversion</td><td>1000 per 1000</td><td><b>1000 per 1000</b><br/>(880 to 1000)</td><td><b>RR 1.00</b><br/>(0.88 to 1.14)</td><td>28<br/>(1 RCT)</td><td>⊕⊕○○<br/>LOW <sup>1,2,3</sup></td></tr><tr><td>Quality of Life - not measured</td><td>-</td><td>-</td><td>-</td><td>-</td><td>-</td></tr><tr><td>Development of Antibiotic Resistance - not measured</td><td>-</td><td>-</td><td>-</td><td>-</td><td>-</td></tr><tr><td>Death - not reported</td><td>-</td><td>-</td><td>-</td><td>-</td><td>-</td></tr><tr><td>Adverse Drug Effects - not reported</td><td>-</td><td>-</td><td>-</td><td>-</td><td>-</td></tr></table> |                                       | Risk with<br>>12 months           | Risk with<br><12 months           | (95% CI)                     | (studies) | (GRADE)          | Cure of NTM | 1000 per 1000 | <b>1000 per 1000</b><br>(880 to 1000) | <b>RR 1.00</b><br>(0.88 to 1.14) | 28<br>(1 RCT) | ⊕⊕○○<br>LOW <sup>1,2</sup> | Recurrence | 0 per 1000 | <b>0 per 1000</b><br>(0 to 0) | <b>RR 3.00</b><br>(0.13 to 67.91) | 28<br>(1 RCT) | ⊕⊕○○<br>LOW <sup>1,2</sup> | Culture Conversion | 1000 per 1000 | <b>1000 per 1000</b><br>(880 to 1000) | <b>RR 1.00</b><br>(0.88 to 1.14) | 28<br>(1 RCT) | ⊕⊕○○<br>LOW <sup>1,2,3</sup> | Quality of Life - not measured | - | - | - | - | - | Development of Antibiotic Resistance - not measured | - | - | - | - | - | Death - not reported | - | - | - | - | - | Adverse Drug Effects - not reported | - | - | - | - | - | The undesirable anticipated effect might be inadequate treatment with progressive disease morbidity and prolonged exposure to antibiotic toxicity |
|-------------------------------------|--------------------------------------------------------------------------------------------------------------------------------------------------------------------------------------------------------------------|---------------------------------------------------------------------------------------------------------------------------------------------------------------------------------------------------------------------------------------------------------------------------------------------------------------------------------------------------------------------------------------------------------------------------------------------------------------------------------------------------------------------------------------------------------------------------------------------------------------------------------------------------------------------------------------------------------------------------------------------------------------------------------------------------------------------------------------------------------------------------------------------------------------------------------------------------------------------------------------------------------------------------------------------------------------------------------------------------------------------------------------------------------------------------------------------------------|---------------------------------------|-----------------------------------|-----------------------------------|------------------------------|-----------|------------------|-------------|---------------|---------------------------------------|----------------------------------|---------------|----------------------------|------------|------------|-------------------------------|-----------------------------------|---------------|----------------------------|--------------------|---------------|---------------------------------------|----------------------------------|---------------|------------------------------|--------------------------------|---|---|---|---|---|-----------------------------------------------------|---|---|---|---|---|----------------------|---|---|---|---|---|-------------------------------------|---|---|---|---|---|---------------------------------------------------------------------------------------------------------------------------------------------------|
|                                     |                                                                                                                                                                                                                    | Risk with<br>>12 months                                                                                                                                                                                                                                                                                                                                                                                                                                                                                                                                                                                                                                                                                                                                                                                                                                                                                                                                                                                                                                                                                                                                                                                 | Risk with<br><12 months               | (95% CI)                          | (studies)                         | (GRADE)                      |           |                  |             |               |                                       |                                  |               |                            |            |            |                               |                                   |               |                            |                    |               |                                       |                                  |               |                              |                                |   |   |   |   |   |                                                     |   |   |   |   |   |                      |   |   |   |   |   |                                     |   |   |   |   |   |                                                                                                                                                   |
|                                     | Cure of NTM                                                                                                                                                                                                        | 1000 per 1000                                                                                                                                                                                                                                                                                                                                                                                                                                                                                                                                                                                                                                                                                                                                                                                                                                                                                                                                                                                                                                                                                                                                                                                           | <b>1000 per 1000</b><br>(880 to 1000) | <b>RR 1.00</b><br>(0.88 to 1.14)  | 28<br>(1 RCT)                     | ⊕⊕○○<br>LOW <sup>1,2</sup>   |           |                  |             |               |                                       |                                  |               |                            |            |            |                               |                                   |               |                            |                    |               |                                       |                                  |               |                              |                                |   |   |   |   |   |                                                     |   |   |   |   |   |                      |   |   |   |   |   |                                     |   |   |   |   |   |                                                                                                                                                   |
|                                     | Recurrence                                                                                                                                                                                                         | 0 per 1000                                                                                                                                                                                                                                                                                                                                                                                                                                                                                                                                                                                                                                                                                                                                                                                                                                                                                                                                                                                                                                                                                                                                                                                              | <b>0 per 1000</b><br>(0 to 0)         | <b>RR 3.00</b><br>(0.13 to 67.91) | 28<br>(1 RCT)                     | ⊕⊕○○<br>LOW <sup>1,2</sup>   |           |                  |             |               |                                       |                                  |               |                            |            |            |                               |                                   |               |                            |                    |               |                                       |                                  |               |                              |                                |   |   |   |   |   |                                                     |   |   |   |   |   |                      |   |   |   |   |   |                                     |   |   |   |   |   |                                                                                                                                                   |
|                                     | Culture Conversion                                                                                                                                                                                                 | 1000 per 1000                                                                                                                                                                                                                                                                                                                                                                                                                                                                                                                                                                                                                                                                                                                                                                                                                                                                                                                                                                                                                                                                                                                                                                                           | <b>1000 per 1000</b><br>(880 to 1000) | <b>RR 1.00</b><br>(0.88 to 1.14)  | 28<br>(1 RCT)                     | ⊕⊕○○<br>LOW <sup>1,2,3</sup> |           |                  |             |               |                                       |                                  |               |                            |            |            |                               |                                   |               |                            |                    |               |                                       |                                  |               |                              |                                |   |   |   |   |   |                                                     |   |   |   |   |   |                      |   |   |   |   |   |                                     |   |   |   |   |   |                                                                                                                                                   |
|                                     | Quality of Life - not measured                                                                                                                                                                                     | -                                                                                                                                                                                                                                                                                                                                                                                                                                                                                                                                                                                                                                                                                                                                                                                                                                                                                                                                                                                                                                                                                                                                                                                                       | -                                     | -                                 | -                                 | -                            |           |                  |             |               |                                       |                                  |               |                            |            |            |                               |                                   |               |                            |                    |               |                                       |                                  |               |                              |                                |   |   |   |   |   |                                                     |   |   |   |   |   |                      |   |   |   |   |   |                                     |   |   |   |   |   |                                                                                                                                                   |
|                                     | Development of Antibiotic Resistance - not measured                                                                                                                                                                | -                                                                                                                                                                                                                                                                                                                                                                                                                                                                                                                                                                                                                                                                                                                                                                                                                                                                                                                                                                                                                                                                                                                                                                                                       | -                                     | -                                 | -                                 | -                            |           |                  |             |               |                                       |                                  |               |                            |            |            |                               |                                   |               |                            |                    |               |                                       |                                  |               |                              |                                |   |   |   |   |   |                                                     |   |   |   |   |   |                      |   |   |   |   |   |                                     |   |   |   |   |   |                                                                                                                                                   |
|                                     | Death - not reported                                                                                                                                                                                               | -                                                                                                                                                                                                                                                                                                                                                                                                                                                                                                                                                                                                                                                                                                                                                                                                                                                                                                                                                                                                                                                                                                                                                                                                       | -                                     | -                                 | -                                 | -                            |           |                  |             |               |                                       |                                  |               |                            |            |            |                               |                                   |               |                            |                    |               |                                       |                                  |               |                              |                                |   |   |   |   |   |                                                     |   |   |   |   |   |                      |   |   |   |   |   |                                     |   |   |   |   |   |                                                                                                                                                   |
| Adverse Drug Effects - not reported | -                                                                                                                                                                                                                  | -                                                                                                                                                                                                                                                                                                                                                                                                                                                                                                                                                                                                                                                                                                                                                                                                                                                                                                                                                                                                                                                                                                                                                                                                       | -                                     | -                                 | -                                 |                              |           |                  |             |               |                                       |                                  |               |                            |            |            |                               |                                   |               |                            |                    |               |                                       |                                  |               |                              |                                |   |   |   |   |   |                                                     |   |   |   |   |   |                      |   |   |   |   |   |                                     |   |   |   |   |   |                                                                                                                                                   |
| CERTAINTY OF EVIDENCE               | <b>What is the overall certainty of the evidence of effects?</b> <ul style="list-style-type: none"><li>● Very low</li><li>○ Low</li><li>○ Moderate</li><li>○ High</li><li>○ No included studies</li></ul>          | <b>The relative importance or values of the main outcomes of interest:</b> <table><tr><th>Outcome</th><th>Relative importance</th><th>Certainty of the evidence (GRADE)</th></tr><tr><td>Cure of NTM</td><td>CRITICAL</td><td>⊕○○○<br/>VERY LOW</td></tr><tr><td>Recurrence</td><td>CRITICAL</td><td>⊕○○○<br/>VERY LOW</td></tr></table>                                                                                                                                                                                                                                                                                                                                                                                                                                                                                                                                                                                                                                                                                                                                                                                                                                                                | Outcome                               | Relative importance               | Certainty of the evidence (GRADE) | Cure of NTM                  | CRITICAL  | ⊕○○○<br>VERY LOW | Recurrence  | CRITICAL      | ⊕○○○<br>VERY LOW                      |                                  |               |                            |            |            |                               |                                   |               |                            |                    |               |                                       |                                  |               |                              |                                |   |   |   |   |   |                                                     |   |   |   |   |   |                      |   |   |   |   |   |                                     |   |   |   |   |   |                                                                                                                                                   |
|                                     | Outcome                                                                                                                                                                                                            | Relative importance                                                                                                                                                                                                                                                                                                                                                                                                                                                                                                                                                                                                                                                                                                                                                                                                                                                                                                                                                                                                                                                                                                                                                                                     | Certainty of the evidence (GRADE)     |                                   |                                   |                              |           |                  |             |               |                                       |                                  |               |                            |            |            |                               |                                   |               |                            |                    |               |                                       |                                  |               |                              |                                |   |   |   |   |   |                                                     |   |   |   |   |   |                      |   |   |   |   |   |                                     |   |   |   |   |   |                                                                                                                                                   |
|                                     | Cure of NTM                                                                                                                                                                                                        | CRITICAL                                                                                                                                                                                                                                                                                                                                                                                                                                                                                                                                                                                                                                                                                                                                                                                                                                                                                                                                                                                                                                                                                                                                                                                                | ⊕○○○<br>VERY LOW                      |                                   |                                   |                              |           |                  |             |               |                                       |                                  |               |                            |            |            |                               |                                   |               |                            |                    |               |                                       |                                  |               |                              |                                |   |   |   |   |   |                                                     |   |   |   |   |   |                      |   |   |   |   |   |                                     |   |   |   |   |   |                                                                                                                                                   |
| Recurrence                          | CRITICAL                                                                                                                                                                                                           | ⊕○○○<br>VERY LOW                                                                                                                                                                                                                                                                                                                                                                                                                                                                                                                                                                                                                                                                                                                                                                                                                                                                                                                                                                                                                                                                                                                                                                                        |                                       |                                   |                                   |                              |           |                  |             |               |                                       |                                  |               |                            |            |            |                               |                                   |               |                            |                    |               |                                       |                                  |               |                              |                                |   |   |   |   |   |                                                     |   |   |   |   |   |                      |   |   |   |   |   |                                     |   |   |   |   |   |                                                                                                                                                   |

|        |                                                                                                                                                                                                                                                                                                                                                                                |                                                                                                                                                                                                                                                                                                                                                                                                                                                                                                                                                                                                                                                                                                                                                                                                                                                                                                                                                                                                                                                                                                                                                                          |          |                  |  |
|--------|--------------------------------------------------------------------------------------------------------------------------------------------------------------------------------------------------------------------------------------------------------------------------------------------------------------------------------------------------------------------------------|--------------------------------------------------------------------------------------------------------------------------------------------------------------------------------------------------------------------------------------------------------------------------------------------------------------------------------------------------------------------------------------------------------------------------------------------------------------------------------------------------------------------------------------------------------------------------------------------------------------------------------------------------------------------------------------------------------------------------------------------------------------------------------------------------------------------------------------------------------------------------------------------------------------------------------------------------------------------------------------------------------------------------------------------------------------------------------------------------------------------------------------------------------------------------|----------|------------------|--|
|        |                                                                                                                                                                                                                                                                                                                                                                                | Culture Conversion                                                                                                                                                                                                                                                                                                                                                                                                                                                                                                                                                                                                                                                                                                                                                                                                                                                                                                                                                                                                                                                                                                                                                       | CRITICAL | ⊕○○○<br>VERY LOW |  |
|        |                                                                                                                                                                                                                                                                                                                                                                                | Quality of Life                                                                                                                                                                                                                                                                                                                                                                                                                                                                                                                                                                                                                                                                                                                                                                                                                                                                                                                                                                                                                                                                                                                                                          | CRITICAL |                  |  |
|        |                                                                                                                                                                                                                                                                                                                                                                                | Development of Antibiotic Resistance                                                                                                                                                                                                                                                                                                                                                                                                                                                                                                                                                                                                                                                                                                                                                                                                                                                                                                                                                                                                                                                                                                                                     | CRITICAL |                  |  |
|        |                                                                                                                                                                                                                                                                                                                                                                                | Death                                                                                                                                                                                                                                                                                                                                                                                                                                                                                                                                                                                                                                                                                                                                                                                                                                                                                                                                                                                                                                                                                                                                                                    | CRITICAL |                  |  |
|        |                                                                                                                                                                                                                                                                                                                                                                                | Adverse Drug Effects                                                                                                                                                                                                                                                                                                                                                                                                                                                                                                                                                                                                                                                                                                                                                                                                                                                                                                                                                                                                                                                                                                                                                     | CRITICAL |                  |  |
|        |                                                                                                                                                                                                                                                                                                                                                                                |                                                                                                                                                                                                                                                                                                                                                                                                                                                                                                                                                                                                                                                                                                                                                                                                                                                                                                                                                                                                                                                                                                                                                                          |          |                  |  |
| VALUES | <p><b>Is there important uncertainty about or variability in how much people value the main outcomes?</b></p> <ul style="list-style-type: none"> <li>○ Important uncertainty or variability</li> <li>● Possibly important uncertainty or variability</li> <li>○ Probably no important uncertainty or variability</li> <li>○ No important uncertainty or variability</li> </ul> | <p>Values and preferences:</p> <p>Three relevant studies were identified that provide data on patient values and preferences:</p> <p>Mehta and Marras, 2011 evaluated the impact of pulmonary NTM on health-related quality of life. In this study, patients with pulmonary NTM had significantly impaired health-related quality of life with two QOL measures significantly lower than historical normal controls. Multivariable analysis showed an association between QOL scores and lung function</p> <p>Hong, et al, 2014 also evaluated the impact of pulmonary NTM on health-related quality of life. This was a direct comparison between patients with NTM disease and healthy subjects and found patients with NTM reported more health status issues and anxiety/depression issues than healthy controls. Lung function was also independently associated with QOL scores.</p> <p>Czaja, et al 2015 evaluated change in quality of life in response to various treatment regimens for <i>M. abscessus</i> (many patients had coinfection with MAC or Pseudomonas). Mean QOL score was significantly improved after treatment at 3, 6, 12, and 24 months.</p> |          |                  |  |

**Does the balance between desirable and undesirable effects favor the intervention or the comparison?**

- Favors the comparison
- Probably favors the comparison
- Does not favor either the intervention or the comparison
- Probably favors the intervention
- Favors the intervention
  
- Varies
- Don't know

**<12 months compared to >12 months for M kansasii**

| Outcomes                                            | Anticipated absolute effects* (95% CI) |                                       | Relative effect (95% CI)          | Nº of participants (studies) | Quality of the evidence (GRADE) |
|-----------------------------------------------------|----------------------------------------|---------------------------------------|-----------------------------------|------------------------------|---------------------------------|
|                                                     | Risk with >12 months                   | Risk with <12 months                  |                                   |                              |                                 |
| Cure of NTM                                         | 1000 per 1000                          | <b>1000 per 1000</b><br>(880 to 1000) | <b>RR 1.00</b><br>(0.88 to 1.14)  | 28<br>(1 RCT)                | ⊕⊕○○<br>LOW <sup>1,2</sup>      |
| Recurrence                                          | 0 per 1000                             | <b>0 per 1000</b><br>(0 to 0)         | <b>RR 3.00</b><br>(0.13 to 67.91) | 28<br>(1 RCT)                | ⊕⊕○○<br>LOW <sup>1,2</sup>      |
| Culture Conversion                                  | 1000 per 1000                          | <b>1000 per 1000</b><br>(880 to 1000) | <b>RR 1.00</b><br>(0.88 to 1.14)  | 28<br>(1 RCT)                | ⊕⊕○○<br>LOW <sup>1,2,3</sup>    |
| Quality of Life - not measured                      | -                                      | -                                     | -                                 | -                            | -                               |
| Development of Antibiotic Resistance - not measured | -                                      | -                                     | -                                 | -                            | -                               |
| Death - not reported                                | -                                      | -                                     | -                                 | -                            | -                               |
| Adverse Drug Effects - not reported                 | -                                      | -                                     | -                                 | -                            | -                               |

|                    |                                                                                                                                                                                                                                                                                                                                                                                                                                 |                                      |  |
|--------------------|---------------------------------------------------------------------------------------------------------------------------------------------------------------------------------------------------------------------------------------------------------------------------------------------------------------------------------------------------------------------------------------------------------------------------------|--------------------------------------|--|
| RESOURCES REQUIRED | <p><b>How large are the resource requirements (costs)?</b></p> <ul style="list-style-type: none"> <li>○ Large costs</li> <li>○ Moderate costs</li> <li>● Negligible costs and savings</li> <li>○ Moderate savings</li> <li>○ Large savings</li> <li>○ Varies</li> <li>○ Don't know</li> </ul>                                                                                                                                   | No research evidence was identified. |  |
| COST EFFECTIVENESS | <p><b>Does the cost-effectiveness of the intervention favor the intervention or the comparison?</b></p> <ul style="list-style-type: none"> <li>○ Favors the comparison</li> <li>○ Probably favors the comparison</li> <li>● Does not favor either the intervention or the comparison</li> <li>○ Probably favors the intervention</li> <li>○ Favors the intervention</li> <li>○ Varies</li> <li>○ No included studies</li> </ul> | No research evidence was identified. |  |
| EQUITY             | <p><b>What would be the impact on health equity?</b></p> <ul style="list-style-type: none"> <li>○ Reduced</li> <li>○ Probably reduced</li> <li>● Probably no impact</li> <li>○ Probably increased</li> <li>○ Increased</li> <li>○ Varies</li> <li>○ Don't know</li> </ul>                                                                                                                                                       | No research evidence was identified. |  |
| ACCEPTABILITY      | <p><b>Is the intervention acceptable to key stakeholders?</b></p> <ul style="list-style-type: none"> <li>○ No</li> <li>○ Probably no</li> <li>● Probably yes</li> <li>○ Yes</li> </ul>                                                                                                                                                                                                                                          | No research evidence was identified. |  |

|             |                                                                                                                                                                                                                                                                |                                      |  |
|-------------|----------------------------------------------------------------------------------------------------------------------------------------------------------------------------------------------------------------------------------------------------------------|--------------------------------------|--|
|             | <ul style="list-style-type: none"> <li>○ Varies</li> <li>○ Don't know</li> </ul>                                                                                                                                                                               |                                      |  |
| FEASIBILITY | <p><b>Is the intervention feasible to implement?</b></p> <ul style="list-style-type: none"> <li>○ No</li> <li>○ Probably no</li> <li>● Probably yes</li> <li>○ Yes</li> </ul> <ul style="list-style-type: none"> <li>○ Varies</li> <li>○ Don't know</li> </ul> | No research evidence was identified. |  |

## Summary of judgments

|                       | JUDGEMENT                |                    |                       |                             |  |        |                     | IMPLICATIONS |
|-----------------------|--------------------------|--------------------|-----------------------|-----------------------------|--|--------|---------------------|--------------|
| DESIRABLE EFFECTS     | Trivial                  | Small              | Moderate              | Large                       |  | Varies | Don't know          |              |
| UNDESIRABLE EFFECTS   | Large                    | Moderate           | Small                 | Trivial                     |  | Varies | Don't know          |              |
| CERTAINTY OF EVIDENCE | Very low                 | Low                | Moderate              | High                        |  |        | No included studies |              |
| VALUES                | Important uncertainty or | Possibly important | Probably no important | No important uncertainty or |  |        |                     |              |

|                           | JUDGEMENT             |                                       |                                                                 |                                  |                         |        |                     | IMPLICATIONS |
|---------------------------|-----------------------|---------------------------------------|-----------------------------------------------------------------|----------------------------------|-------------------------|--------|---------------------|--------------|
|                           | variability           | <b>uncertainty or variability</b>     | uncertainty or variability                                      | variability                      |                         |        |                     |              |
| <b>BALANCE OF EFFECTS</b> | Favors the comparison | <b>Probably favors the comparison</b> | Does not favor either the intervention or the comparison        | Probably favors the intervention | Favors the intervention | Varies | Don't know          |              |
| <b>RESOURCES REQUIRED</b> | Large costs           | Moderate costs                        | <b>Negligible costs and savings</b>                             | Moderate savings                 | Large savings           | Varies | Don't know          |              |
| <b>COST EFFECTIVENESS</b> | Favors the comparison | Probably favors the comparison        | <b>Does not favor either the intervention or the comparison</b> | Probably favors the intervention | Favors the intervention | Varies | No included studies |              |
| <b>EQUITY</b>             | Reduced               | Probably reduced                      | <b>Probably no impact</b>                                       | Probably increased               | Increased               | Varies | Don't know          |              |
| <b>ACCEPTABILITY</b>      | No                    | Probably no                           | <b>Probably yes</b>                                             | Yes                              |                         | Varies | Don't know          |              |
| <b>FEASIBILITY</b>        | No                    | Probably no                           | <b>Probably yes</b>                                             | Yes                              |                         | Varies | Don't know          |              |

## Conclusions

**In patients with rifampicin-susceptible *M. kansasii* pulmonary disease, should treatment be continued for less than**

## 12 months or 12 or more months?

| TYPE OF RECOMMENDATION               | Strong recommendation against the intervention<br><br>○                                                                                                                                                                                                                                                                                                  | Conditional recommendation against the intervention<br><br>● | Conditional recommendation for either the intervention or the comparison<br><br>○ | Conditional recommendation for the intervention<br><br>○ | Strong recommendation for the intervention<br><br>○ |
|--------------------------------------|----------------------------------------------------------------------------------------------------------------------------------------------------------------------------------------------------------------------------------------------------------------------------------------------------------------------------------------------------------|--------------------------------------------------------------|-----------------------------------------------------------------------------------|----------------------------------------------------------|-----------------------------------------------------|
| <b>RECOMMENDATION</b>                | <p>We suggest that patients with rifampicin susceptible <i>M. kansasii</i> pulmonary disease be treated for at least 12 months regardless of when culture conversion occurs (conditional recommendation, very low confidence in estimates of effect).</p> <p>The expert panel voted unanimously for a conditional recommendation for the comparison.</p> |                                                              |                                                                                   |                                                          |                                                     |
| <b>JUSTIFICATION</b>                 | <p><i>M. kansasii</i> can be associated with significant lung destruction if undertreated. However, if treated appropriately, treatment outcomes are excellent. Therefore, a conservative treatment approach is warranted, favoring a longer treatment course.</p>                                                                                       |                                                              |                                                                                   |                                                          |                                                     |
| <b>SUBGROUP CONSIDERATIONS</b>       |                                                                                                                                                                                                                                                                                                                                                          |                                                              |                                                                                   |                                                          |                                                     |
| <b>IMPLEMENTATION CONSIDERATIONS</b> |                                                                                                                                                                                                                                                                                                                                                          |                                                              |                                                                                   |                                                          |                                                     |
| <b>MONITORING AND EVALUATION</b>     |                                                                                                                                                                                                                                                                                                                                                          |                                                              |                                                                                   |                                                          |                                                     |
| <b>RESEARCH PRIORITIES</b>           | <p>Clinical trials to determine optimal duration of therapy.</p> <p>Clinical trial of shorter regimens: 9 months rifampin/ethambutol/macrolide vs. 12 months isoniazid/rifampin/ethambutol.</p> <p>Clinical trial of 6 vs 12 months - moxifloxacin/clarithromycin/rifampin.</p>                                                                          |                                                              |                                                                                   |                                                          |                                                     |



Table E4.15. Question XV

|                                                                                                                                                                 |                                                                                                                                                                           |
|-----------------------------------------------------------------------------------------------------------------------------------------------------------------|---------------------------------------------------------------------------------------------------------------------------------------------------------------------------|
| In patients with <i>M. xenopi</i> pulmonary disease, should a treatment regimen that includes a fluoroquinolone or a regimen without a fluoroquinolone be used? |                                                                                                                                                                           |
| POPULATION:                                                                                                                                                     | patients with newly diagnosed pulmonary <i>M. xenopii</i> infection                                                                                                       |
| INTERVENTION:                                                                                                                                                   | a quinolone containing regimen                                                                                                                                            |
| COMPARISON:                                                                                                                                                     | regimen without a fluoroquinolone                                                                                                                                         |
| MAIN OUTCOMES:                                                                                                                                                  | Death; Quality of life; Cure of NTM disease; Recurrence (relapse); Culture conversion; Development of antibiotic resistance; Severe adverse effects; Any adverse effects; |

Assessment

|                   | JUDGEMENT                                                                                                                                          | RESEARCH EVIDENCE                                                                                                                                   |                                               |          |       |            | ADDITIONAL CONSIDERATIONS                                                                                                                    |
|-------------------|----------------------------------------------------------------------------------------------------------------------------------------------------|-----------------------------------------------------------------------------------------------------------------------------------------------------|-----------------------------------------------|----------|-------|------------|----------------------------------------------------------------------------------------------------------------------------------------------|
| DESIRABLE EFFECTS | <b>How substantial are the desirable anticipated effects?</b><br><br>● Trivial<br>○ Small<br>○ Moderate<br>○ Large<br><br>○ Varies<br>○ Don't know |                                                                                                                                                     |                                               |          |       |            | An ongoing study by C. Andrejak, et al (CaMoMy study), has shown no difference between groups for 6 month sputum conversion, adverse events. |
|                   |                                                                                                                                                    | <b>A quinolone containing regimen compared to regimen without a fluoroquinolone in patients with newly diagnosed pulmonary M. xenopii infection</b> |                                               |          |       |            |                                                                                                                                              |
|                   |                                                                                                                                                    | Outcomes                                                                                                                                            | <b>Anticipated absolute effects* (95% CI)</b> | Relative | Nº of | Quality of |                                                                                                                                              |

**How substantial are the undesirable anticipated effects?**

- Large
- Moderate
- Small
- Trivial
- Varies
- Don't know

|                                                     |            | Risk with regimen without a fluoroquinolone | Risk with a quinolone containing regimen | effect (95% CI)                  | participants (studies) | the evidence (GRADE)              |
|-----------------------------------------------------|------------|---------------------------------------------|------------------------------------------|----------------------------------|------------------------|-----------------------------------|
| Death follow up: 5 years                            | 29 per 100 |                                             | <b>47 per 100</b><br>(19 to 100)         | <b>RR 1.60</b><br>(0.66 to 3.91) | 34<br>(1 RCT)          | ⊕⊕○○<br>LOW <sup>1,2</sup>        |
| Quality of life - not measured                      | -          | -                                           | -                                        | -                                | -                      | -                                 |
| Cure of NTM disease follow up: 5 years              | 35 per 100 |                                             | <b>35 per 100</b><br>(14 to 88)          | <b>RR 1.00</b><br>(0.40 to 2.48) | 34<br>(1 RCT)          | ⊕⊕○○<br>LOW <sup>1,2</sup>        |
| Recurrence (relapse) follow up: 5 years             | 12 per 100 |                                             | <b>2 per 100</b><br>(0 to 46)            | <b>RR 0.20</b><br>(0.01 to 3.88) | 34<br>(1 RCT)          | ⊕⊕○○<br>LOW <sup>1,3</sup>        |
| Culture conversion - not reported                   | -          | -                                           | -                                        | -                                | -                      | -                                 |
| Development of antibiotic resistance - not measured | -          | -                                           | -                                        | -                                | -                      | -                                 |
| Severe adverse effects - not reported               | -          | -                                           | -                                        | -                                | -                      | -                                 |
| Any adverse effects follow up: 2 years              | 20 per 100 |                                             | <b>20 per 100</b><br>(14 to 31)          | <b>RR 1.03</b><br>(0.69 to 1.55) | 371<br>(1 RCT)         | ⊕○○○<br>VERY LOW <sup>1,4,5</sup> |

**What is the overall certainty of the evidence of effects?**

- Very low
- Low
- Moderate
- High
- No included studies

**The relative importance or values of the main outcomes of interest:**

| Outcome                              | Relative importance | Certainty of the evidence (GRADE) |
|--------------------------------------|---------------------|-----------------------------------|
| Death                                | CRITICAL            | ⊕⊕○○<br>LOW                       |
| Quality of life                      | CRITICAL            | -                                 |
| Cure of NTM disease                  | CRITICAL            | ⊕⊕○○<br>LOW                       |
| Recurrence (relapse)                 | CRITICAL            | ⊕⊕○○<br>LOW                       |
| Culture conversion                   | CRITICAL            | -                                 |
| Development of antibiotic resistance | CRITICAL            | -                                 |
| Severe adverse effects               | CRITICAL            | -                                 |
| Any adverse effects                  | CRITICAL            | ⊕○○○<br>VERY LOW                  |

|        |                                                                                                                                                                                                                                                                                                                                                                                |                                                                                                                                                                                                                                                                                                                                                                                                                                                                                                                                                                                                                                                                                                                                                                                                                                                                                                                                                                                                                                                                                                                                     |  |
|--------|--------------------------------------------------------------------------------------------------------------------------------------------------------------------------------------------------------------------------------------------------------------------------------------------------------------------------------------------------------------------------------|-------------------------------------------------------------------------------------------------------------------------------------------------------------------------------------------------------------------------------------------------------------------------------------------------------------------------------------------------------------------------------------------------------------------------------------------------------------------------------------------------------------------------------------------------------------------------------------------------------------------------------------------------------------------------------------------------------------------------------------------------------------------------------------------------------------------------------------------------------------------------------------------------------------------------------------------------------------------------------------------------------------------------------------------------------------------------------------------------------------------------------------|--|
|        |                                                                                                                                                                                                                                                                                                                                                                                |                                                                                                                                                                                                                                                                                                                                                                                                                                                                                                                                                                                                                                                                                                                                                                                                                                                                                                                                                                                                                                                                                                                                     |  |
| VALUES | <p><b>Is there important uncertainty about or variability in how much people value the main outcomes?</b></p> <ul style="list-style-type: none"> <li>○ Important uncertainty or variability</li> <li>● Possibly important uncertainty or variability</li> <li>○ Probably no important uncertainty or variability</li> <li>○ No important uncertainty or variability</li> </ul> | <p>Three relevant studies were identified that provide data on patient values and preferences: Mehta and Marras, 2011 evaluated the impact of pulmonary NTM on health-related quality of life. In this study, patients with pulmonary NTM had significantly impaired health-related quality of life with two QOL measures significantly lower than historical normal controls. Multivariable analysis showed an association between QOL scores and lung function.</p> <p>Hong, et al, 2014 also evaluated the impact of pulmonary NTM on health-related quality of life. This was a direct comparison between patients with NTM disease and healthy subjects and found patients with NTM reported more health status issues and anxiety/depression issues than healthy controls. Lung function was also independently associated with QOL scores.</p> <p>Czaja, et al 2015 evaluated change in quality of life in response to various treatment regimens for <i>M. abscessus</i> (many patients had coinfection with MAC or Pseudomonas). Mean QOL score was significantly improved after treatment at 3, 6, 12, and 24 months.</p> |  |

**Does the balance between desirable and undesirable effects favor the intervention or the comparison?**

- Favors the comparison
- Probably favors the comparison
- Does not favor either the intervention or the comparison
- Probably favors the intervention
- Favors the intervention
  
- Varies
- Don't know

**A quinolone containing regimen compared to regimen without a fluoroquinolone in patients with newly diagnosed pulmonary *M. xenopii* infection**

| Outcomes                                            | Anticipated absolute effects* (95% CI)      |                                          | Relative effect (95% CI)         | Nº of participants (studies) | Quality of the evidence (GRADE)   |
|-----------------------------------------------------|---------------------------------------------|------------------------------------------|----------------------------------|------------------------------|-----------------------------------|
|                                                     | Risk with regimen without a fluoroquinolone | Risk with a quinolone containing regimen |                                  |                              |                                   |
| Death follow up: 5 years                            | 29 per 100                                  | <b>47 per 100</b><br>(19 to 100)         | <b>RR 1.60</b><br>(0.66 to 3.91) | 34<br>(1 RCT)                | ⊕⊕○○<br>LOW <sup>1,2</sup>        |
| Quality of life - not measured                      | -                                           | -                                        | -                                | -                            | -                                 |
| Cure of NTM disease follow up: 5 years              | 35 per 100                                  | <b>35 per 100</b><br>(14 to 88)          | <b>RR 1.00</b><br>(0.40 to 2.48) | 34<br>(1 RCT)                | ⊕⊕○○<br>LOW <sup>1,2</sup>        |
| Recurrence (relapse) follow up: 5 years             | 12 per 100                                  | <b>2 per 100</b><br>(0 to 46)            | <b>RR 0.20</b><br>(0.01 to 3.88) | 34<br>(1 RCT)                | ⊕⊕○○<br>LOW <sup>1,3</sup>        |
| Culture conversion - not reported                   | -                                           | -                                        | -                                | -                            | -                                 |
| Development of antibiotic resistance - not measured | -                                           | -                                        | -                                | -                            | -                                 |
| Severe adverse effects - not reported               | -                                           | -                                        | -                                | -                            | -                                 |
| Any adverse effects follow up: 2 years              | 20 per 100                                  | <b>20 per 100</b><br>(14 to 31)          | <b>RR 1.03</b><br>(0.69 to 1.55) | 371<br>(1 RCT)               | ⊕○○○<br>VERY LOW <sup>1,4,5</sup> |

Intervention is fluoroquinolone-containing regimen.

|                    |                                                                                                                                                                                                                                                                                                                                                                                                                                 |                                      |  |
|--------------------|---------------------------------------------------------------------------------------------------------------------------------------------------------------------------------------------------------------------------------------------------------------------------------------------------------------------------------------------------------------------------------------------------------------------------------|--------------------------------------|--|
| RESOURCES REQUIRED | <p><b>How large are the resource requirements (costs)?</b></p> <ul style="list-style-type: none"> <li>○ Large costs</li> <li>○ Moderate costs</li> <li>○ Negligible costs and savings</li> <li>○ Moderate savings</li> <li>○ Large savings</li> <li>● Varies</li> <li>○ Don't know</li> </ul>                                                                                                                                   | No research evidence was identified. |  |
| COST EFFECTIVENESS | <p><b>Does the cost-effectiveness of the intervention favor the intervention or the comparison?</b></p> <ul style="list-style-type: none"> <li>○ Favors the comparison</li> <li>○ Probably favors the comparison</li> <li>○ Does not favor either the intervention or the comparison</li> <li>○ Probably favors the intervention</li> <li>○ Favors the intervention</li> <li>● Varies</li> <li>○ No included studies</li> </ul> | No research evidence was identified. |  |
| EQUITY             | <p><b>What would be the impact on health equity?</b></p> <ul style="list-style-type: none"> <li>○ Reduced</li> <li>○ Probably reduced</li> <li>● Probably no impact</li> <li>○ Probably increased</li> <li>○ Increased</li> <li>○ Varies</li> <li>○ Don't know</li> </ul>                                                                                                                                                       | No research evidence was identified. |  |

|               |                                                                                                                                                                                                                         |                                      |  |
|---------------|-------------------------------------------------------------------------------------------------------------------------------------------------------------------------------------------------------------------------|--------------------------------------|--|
| ACCEPTABILITY | <b>Is the intervention acceptable to key stakeholders?</b> <ul style="list-style-type: none"> <li>○ No</li> <li>○ Probably no</li> <li>○ Probably yes</li> <li>● Yes</li> <li>○ Varies</li> <li>○ Don't know</li> </ul> | No research evidence was identified. |  |
| FEASIBILITY   | <b>Is the intervention feasible to implement?</b> <ul style="list-style-type: none"> <li>○ No</li> <li>○ Probably no</li> <li>○ Probably yes</li> <li>● Yes</li> <li>○ Varies</li> <li>○ Don't know</li> </ul>          | No research evidence was identified. |  |

## Summary of judgments

|                       | JUDGEMENT                            |                                   |                                      |                                         |  |        |                     | IMPLICATIONS |
|-----------------------|--------------------------------------|-----------------------------------|--------------------------------------|-----------------------------------------|--|--------|---------------------|--------------|
| DESIRABLE EFFECTS     | Trivial                              | Small                             | Moderate                             | Large                                   |  | Varies | Don't know          |              |
| UNDESIRABLE EFFECTS   | Large                                | Moderate                          | Small                                | Trivial                                 |  | Varies | Don't know          |              |
| CERTAINTY OF EVIDENCE | Very low                             | Low                               | Moderate                             | High                                    |  |        | No included studies |              |
| VALUES                | Important uncertainty or variability | Possibly important uncertainty or | Probably no important uncertainty or | No important uncertainty or variability |  |        |                     |              |

|                           | JUDGEMENT             |                                |                                                                 |                                  |                         |               |                     | IMPLICATIONS |
|---------------------------|-----------------------|--------------------------------|-----------------------------------------------------------------|----------------------------------|-------------------------|---------------|---------------------|--------------|
|                           |                       | variability                    | variability                                                     |                                  |                         |               |                     |              |
| <b>BALANCE OF EFFECTS</b> | Favors the comparison | Probably favors the comparison | <b>Does not favor either the intervention or the comparison</b> | Probably favors the intervention | Favors the intervention | Varies        | Don't know          |              |
| <b>RESOURCES REQUIRED</b> | Large costs           | Moderate costs                 | Negligible costs and savings                                    | Moderate savings                 | Large savings           | <b>Varies</b> | Don't know          |              |
| <b>COST EFFECTIVENESS</b> | Favors the comparison | Probably favors the comparison | Does not favor either the intervention or the comparison        | Probably favors the intervention | Favors the intervention | <b>Varies</b> | No included studies |              |
| <b>EQUITY</b>             | Reduced               | Probably reduced               | <b>Probably no impact</b>                                       | Probably increased               | Increased               | Varies        | Don't know          |              |
| <b>ACCEPTABILITY</b>      | No                    | Probably no                    | Probably yes                                                    | <b>Yes</b>                       |                         | Varies        | Don't know          |              |
| <b>FEASIBILITY</b>        | No                    | Probably no                    | Probably yes                                                    | <b>Yes</b>                       |                         | Varies        | Don't know          |              |

## Conclusions

**In patients with *M. xenopi* pulmonary disease, should a treatment regimen that includes a fluoroquinolone or a regimen without a fluoroquinolone be used?**

| TYPE OF RECOMMENDATION | Strong recommendation | Conditional recommendation | Conditional recommendation | Conditional recommendation | Strong recommendation |
|------------------------|-----------------------|----------------------------|----------------------------|----------------------------|-----------------------|
|------------------------|-----------------------|----------------------------|----------------------------|----------------------------|-----------------------|



|                                      | against the<br>intervention                                                                                                                                                                                                                                                                                                                                                                                                                                                                                                                                                                                                                                                                                                                                           | against the<br>intervention | for either the<br>intervention or<br>the comparison | for the<br>intervention | for the<br>intervention |
|--------------------------------------|-----------------------------------------------------------------------------------------------------------------------------------------------------------------------------------------------------------------------------------------------------------------------------------------------------------------------------------------------------------------------------------------------------------------------------------------------------------------------------------------------------------------------------------------------------------------------------------------------------------------------------------------------------------------------------------------------------------------------------------------------------------------------|-----------------------------|-----------------------------------------------------|-------------------------|-------------------------|
|                                      | ○                                                                                                                                                                                                                                                                                                                                                                                                                                                                                                                                                                                                                                                                                                                                                                     | ○                           | ●                                                   | ○                       | ○                       |
| <b>RECOMMENDATION</b>                | In patients with <i>M. xenopi</i> pulmonary disease, we suggest using a treatment regimen that includes moxifloxacin or a macrolide. (conditional recommendation, low confidence in estimates of effect).                                                                                                                                                                                                                                                                                                                                                                                                                                                                                                                                                             |                             |                                                     |                         |                         |
| <b>JUSTIFICATION</b>                 | <p>There is <i>in vitro</i> evidence that macrolides and fluoroquinolones are active against <i>M. xenopi</i>, while rifampin and ethambutol are inactive alone and in combinations. From this perspective, a regimen that utilizes a macrolide or fluoroquinolone is likely most active.</p> <p>There are preliminary data from a randomized trial in favor of a non inferiority of fluoroquinolones in comparison to macrolides in treatment of <i>M. xenopi</i> infections. These data should be confirmed with final results of CaMoMy study.</p> <p>Limited evidence for optimal choice of optimal fluoroquinolone or macrolide - ciprofloxacin, moxifloxacin, and clarithromycin have been studied, but unclear if effects represent entire class of drugs.</p> |                             |                                                     |                         |                         |
| <b>SUBGROUP CONSIDERATIONS</b>       |                                                                                                                                                                                                                                                                                                                                                                                                                                                                                                                                                                                                                                                                                                                                                                       |                             |                                                     |                         |                         |
| <b>IMPLEMENTATION CONSIDERATIONS</b> |                                                                                                                                                                                                                                                                                                                                                                                                                                                                                                                                                                                                                                                                                                                                                                       |                             |                                                     |                         |                         |
| <b>MONITORING AND EVALUATION</b>     | ECG monitoring for potential QTc interval prolongation with long term of use macrolides and/or fluoroquinolones                                                                                                                                                                                                                                                                                                                                                                                                                                                                                                                                                                                                                                                       |                             |                                                     |                         |                         |
| <b>RESEARCH PRIORITIES</b>           | Clinical trial of rifampin/ethambutol/moxifloxacin vs. rifampin/ethambutol/azithromycin vs. rifampin/ethambutol/moxifloxacin/azithromycin.                                                                                                                                                                                                                                                                                                                                                                                                                                                                                                                                                                                                                            |                             |                                                     |                         |                         |

## Table E4.16. Question XVI

In patients with *M. xenopi* pulmonary disease, should a two, three or four-drug regimen be used for treatment?

|                       |                                                                                                            |
|-----------------------|------------------------------------------------------------------------------------------------------------|
| <b>POPULATION:</b>    | treatment of <i>M. xenopi</i> pulmonary infection                                                          |
| <b>INTERVENTION:</b>  | a two drug regimen                                                                                         |
| <b>COMPARISON:</b>    | a three drug regimen                                                                                       |
| <b>MAIN OUTCOMES:</b> | Death; Cure of NTM; Recurrence; Quality of Life; Development of antibiotic resistance; Culture Conversion; |

## Assessment

|                   | JUDGEMENT                                                                                                                                                                                                               | RESEARCH EVIDENCE                                                                                                |                                                     |                                  |                              |                                 | ADDITIONAL CONSIDERATIONS                                                                                                                                                                                                                                                                                                                                                                                                                                                                                                                                                                                                                                                                                   |
|-------------------|-------------------------------------------------------------------------------------------------------------------------------------------------------------------------------------------------------------------------|------------------------------------------------------------------------------------------------------------------|-----------------------------------------------------|----------------------------------|------------------------------|---------------------------------|-------------------------------------------------------------------------------------------------------------------------------------------------------------------------------------------------------------------------------------------------------------------------------------------------------------------------------------------------------------------------------------------------------------------------------------------------------------------------------------------------------------------------------------------------------------------------------------------------------------------------------------------------------------------------------------------------------------|
| DESIRABLE EFFECTS | <b>How substantial are the desirable anticipated effects?</b> <ul style="list-style-type: none"> <li>● Trivial</li> <li>○ Small</li> <li>○ Moderate</li> <li>○ Large</li> <li>○ Varies</li> <li>○ Don't know</li> </ul> | <b>A two drug regimen compared to a three drug regimen for treatment of <i>M. xenopi</i> pulmonary infection</b> |                                                     |                                  |                              |                                 | <i>In vitro</i> , clarithromycin and moxifloxacin are of equal efficacy (Ferro BE et al, Antimicrob Agents Chemother 2015) against <i>M. xenopi</i> . In mouse models, adding either of the two to a rifampicin-ethambutol backbone leads to 3 drug regimens of equal efficacy (Andrejak C, et al., J Antimicrob Chemother. 2013 Mar;68(3):659-65.).<br><br>There is one more informative comparative treatment trial looking at two 3 drug regimens, RE with macrolide or fluoroquinolone (BTS Thorax 63, 627; 2008) but that doesn't address the 2 vs 3 drug regimen. The most recent <i>M. xenopi</i> treatment data comes from case series (Andrejak et al, Thorax 64, 291; van Ingen et al EID, 2008). |
|                   |                                                                                                                                                                                                                         | Outcomes                                                                                                         | Anticipated absolute effects* (95% CI)              | Relative effect (95% CI)         | Nº of participants (studies) | Quality of the evidence (GRADE) |                                                                                                                                                                                                                                                                                                                                                                                                                                                                                                                                                                                                                                                                                                             |
|                   |                                                                                                                                                                                                                         | Death follow up: 5 years                                                                                         | 650 per 1000<br><b>501 per 1000</b><br>(293 to 845) | <b>RR 0.77</b><br>(0.45 to 1.30) | 42<br>(1 RCT)                | ⊕⊕○○<br>LOW <sup>1,2</sup>      |                                                                                                                                                                                                                                                                                                                                                                                                                                                                                                                                                                                                                                                                                                             |

|                       |                                                                                                                                                      |                                                                            |              |                                     |                                   |                                   |                            |  |  |
|-----------------------|------------------------------------------------------------------------------------------------------------------------------------------------------|----------------------------------------------------------------------------|--------------|-------------------------------------|-----------------------------------|-----------------------------------|----------------------------|--|--|
| UNDESIRABLE EFFECTS   | <b>How substantial are the undesirable anticipated effects?</b><br><br>○ Large<br>○ Moderate<br>○ Small<br>● Trivial<br><br>○ Varies<br>○ Don't know | Cure of NTM                                                                | 100 per 1000 | <b>227 per 1000</b><br>(50 to 1000) | <b>RR 2.27</b><br>(0.50 to 10.43) | 42<br>(1 RCT)                     | ⊕⊕○○<br>LOW <sup>1,2</sup> |  |  |
|                       |                                                                                                                                                      | Recurrence                                                                 | 0 per 1000   | <b>0 per 1000</b><br>(0 to 0)       | <b>RR 4.57</b><br>(0.23 to 89.72) | 42<br>(1 RCT)                     | ⊕⊕○○<br>LOW <sup>1,2</sup> |  |  |
|                       |                                                                                                                                                      | Quality of Life - not measured                                             | -            | -                                   | -                                 | -                                 | -                          |  |  |
|                       |                                                                                                                                                      | Development of antibiotic resistance - not measured                        | -            | -                                   | -                                 | -                                 | -                          |  |  |
|                       |                                                                                                                                                      | Culture Conversion - not reported                                          | -            | -                                   | -                                 | -                                 | -                          |  |  |
|                       |                                                                                                                                                      |                                                                            |              |                                     |                                   |                                   |                            |  |  |
| CERTAINTY OF EVIDENCE | <b>What is the overall certainty of the evidence of effects?</b><br><br>○ Very low<br>● Low<br>○ Moderate<br>○ High<br><br>○ No included studies     | <b>The relative importance or values of the main outcomes of interest:</b> |              |                                     |                                   |                                   |                            |  |  |
|                       |                                                                                                                                                      | Outcome                                                                    |              | Relative importance                 |                                   | Certainty of the evidence (GRADE) |                            |  |  |
|                       |                                                                                                                                                      | Death                                                                      |              | CRITICAL                            |                                   | ⊕⊕○○<br>LOW                       |                            |  |  |
|                       |                                                                                                                                                      | Cure of NTM                                                                |              | CRITICAL                            |                                   | ⊕⊕○○<br>LOW                       |                            |  |  |
|                       |                                                                                                                                                      | Recurrence                                                                 |              | CRITICAL                            |                                   | ⊕⊕○○<br>LOW                       |                            |  |  |
|                       |                                                                                                                                                      | Quality of Life                                                            |              | CRITICAL                            |                                   | -                                 |                            |  |  |
|                       |                                                                                                                                                      | Development of antibiotic resistance                                       |              | CRITICAL                            |                                   | -                                 |                            |  |  |

|                    |                                                                                                                                                                                                                                                                                                                                                                           |                                                                                                                                                                                                                                                                                                                                                                                                                                                                                                                                                                                                                                                                                                                                                                                                                                                                                                                                                                                                                                                                                                                                                                          |                    |          |   |  |
|--------------------|---------------------------------------------------------------------------------------------------------------------------------------------------------------------------------------------------------------------------------------------------------------------------------------------------------------------------------------------------------------------------|--------------------------------------------------------------------------------------------------------------------------------------------------------------------------------------------------------------------------------------------------------------------------------------------------------------------------------------------------------------------------------------------------------------------------------------------------------------------------------------------------------------------------------------------------------------------------------------------------------------------------------------------------------------------------------------------------------------------------------------------------------------------------------------------------------------------------------------------------------------------------------------------------------------------------------------------------------------------------------------------------------------------------------------------------------------------------------------------------------------------------------------------------------------------------|--------------------|----------|---|--|
|                    |                                                                                                                                                                                                                                                                                                                                                                           | <table><tr><td>Culture Conversion</td><td>CRITICAL</td><td>-</td></tr></table>                                                                                                                                                                                                                                                                                                                                                                                                                                                                                                                                                                                                                                                                                                                                                                                                                                                                                                                                                                                                                                                                                           | Culture Conversion | CRITICAL | - |  |
| Culture Conversion | CRITICAL                                                                                                                                                                                                                                                                                                                                                                  | -                                                                                                                                                                                                                                                                                                                                                                                                                                                                                                                                                                                                                                                                                                                                                                                                                                                                                                                                                                                                                                                                                                                                                                        |                    |          |   |  |
| VALUES             | <p><b>Is there important uncertainty about or variability in how much people value the main outcomes?</b></p> <ul style="list-style-type: none"><li>○ Important uncertainty or variability</li><li>● Possibly important uncertainty or variability</li><li>○ Probably no important uncertainty or variability</li><li>○ No important uncertainty or variability</li></ul> | <p>Values and preferences:</p> <p>Three relevant studies were identified that provide data on patient values and preferences:</p> <p>Mehta and Marras, 2011 evaluated the impact of pulmonary NTM on health-related quality of life. In this study, patients with pulmonary NTM had significantly impaired health-related quality of life with two QOL measures significantly lower than historical normal controls. Multivariable analysis showed an association between QOL scores and lung function</p> <p>Hong, et al, 2014 also evaluated the impact of pulmonary NTM on health-related quality of life. This was a direct comparison between patients with NTM disease and healthy subjects and found patients with NTM reported more health status issues and anxiety/depression issues than healthy controls. Lung function was also independently associated with QOL scores.</p> <p>Czaja, et al 2015 evaluated change in quality of life in response to various treatment regimens for <i>M. abscessus</i> (many patients had coinfection with MAC or Pseudomonas). Mean QOL score was significantly improved after treatment at 3, 6, 12, and 24 months.</p> |                    |          |   |  |

**Does the balance between desirable and undesirable effects favor the intervention or the comparison?**

- Favors the comparison
- Probably favors the comparison
- Does not favor either the intervention or the comparison
- Probably favors the intervention
- Favors the intervention
  
- Varies
- Don't know

**A two drug regimen compared to a three drug regimen for treatment of M. xenopi pulmonary infection**

| Outcomes                                            | Anticipated absolute effects* (95% CI) |                                     | Relative effect (95% CI)          | Nº of participants (studies) | Quality of the evidence (GRADE) |
|-----------------------------------------------------|----------------------------------------|-------------------------------------|-----------------------------------|------------------------------|---------------------------------|
|                                                     | Risk with a three drug regimen         | Risk with a two drug regimen        |                                   |                              |                                 |
| Death follow up: 5 years                            | 650 per 1000                           | <b>501 per 1000</b><br>(293 to 845) | <b>RR 0.77</b><br>(0.45 to 1.30)  | 42<br>(1 RCT)                | ⊕⊕○○<br>LOW <sup>1,2</sup>      |
| Cure of NTM                                         | 100 per 1000                           | <b>227 per 1000</b><br>(50 to 1000) | <b>RR 2.27</b><br>(0.50 to 10.43) | 42<br>(1 RCT)                | ⊕⊕○○<br>LOW <sup>1,2</sup>      |
| Recurrence                                          | 0 per 1000                             | <b>0 per 1000</b><br>(0 to 0)       | <b>RR 4.57</b><br>(0.23 to 89.72) | 42<br>(1 RCT)                | ⊕⊕○○<br>LOW <sup>1,2</sup>      |
| Quality of Life - not measured                      | -                                      | -                                   | -                                 | -                            | -                               |
| Development of antibiotic resistance - not measured | -                                      | -                                   | -                                 | -                            | -                               |
| Culture Conversion - not reported                   | -                                      | -                                   | -                                 | -                            | -                               |

|                    |                                                                                                                                                                                                                                                                                                                                                                                                                                 |                                      |  |
|--------------------|---------------------------------------------------------------------------------------------------------------------------------------------------------------------------------------------------------------------------------------------------------------------------------------------------------------------------------------------------------------------------------------------------------------------------------|--------------------------------------|--|
| RESOURCES REQUIRED | <p><b>How large are the resource requirements (costs)?</b></p> <ul style="list-style-type: none"> <li>○ Large costs</li> <li>○ Moderate costs</li> <li>● Negligible costs and savings</li> <li>○ Moderate savings</li> <li>○ Large savings</li> <li>○ Varies</li> <li>○ Don't know</li> </ul>                                                                                                                                   | No research evidence was identified. |  |
| COST EFFECTIVENESS | <p><b>Does the cost-effectiveness of the intervention favor the intervention or the comparison?</b></p> <ul style="list-style-type: none"> <li>○ Favors the comparison</li> <li>○ Probably favors the comparison</li> <li>● Does not favor either the intervention or the comparison</li> <li>○ Probably favors the intervention</li> <li>○ Favors the intervention</li> <li>○ Varies</li> <li>○ No included studies</li> </ul> | No research evidence was identified. |  |
| EQUITY             | <p><b>What would be the impact on health equity?</b></p> <ul style="list-style-type: none"> <li>○ Reduced</li> <li>○ Probably reduced</li> <li>● Probably no impact</li> <li>○ Probably increased</li> <li>○ Increased</li> <li>○ Varies</li> <li>○ Don't know</li> </ul>                                                                                                                                                       | No research evidence was identified. |  |
| ACCEPTABILITY      | <p><b>Is the intervention acceptable to key stakeholders?</b></p> <ul style="list-style-type: none"> <li>○ No</li> <li>○ Probably no</li> <li>● Probably yes</li> <li>○ Yes</li> </ul>                                                                                                                                                                                                                                          | No research evidence was identified. |  |

|             |                                                                                                                                                                                                                                                                |                                      |  |
|-------------|----------------------------------------------------------------------------------------------------------------------------------------------------------------------------------------------------------------------------------------------------------------|--------------------------------------|--|
|             | <ul style="list-style-type: none"> <li>○ Varies</li> <li>○ Don't know</li> </ul>                                                                                                                                                                               |                                      |  |
| FEASIBILITY | <p><b>Is the intervention feasible to implement?</b></p> <ul style="list-style-type: none"> <li>○ No</li> <li>○ Probably no</li> <li>● Probably yes</li> <li>○ Yes</li> </ul> <ul style="list-style-type: none"> <li>○ Varies</li> <li>○ Don't know</li> </ul> | No research evidence was identified. |  |

## Summary of judgments

|                       | JUDGEMENT                |                    |                       |                             |  |        |                     | IMPLICATIONS |
|-----------------------|--------------------------|--------------------|-----------------------|-----------------------------|--|--------|---------------------|--------------|
| DESIRABLE EFFECTS     | Trivial                  | Small              | Moderate              | Large                       |  | Varies | Don't know          |              |
| UNDESIRABLE EFFECTS   | Large                    | Moderate           | Small                 | Trivial                     |  | Varies | Don't know          |              |
| CERTAINTY OF EVIDENCE | Very low                 | Low                | Moderate              | High                        |  |        | No included studies |              |
| VALUES                | Important uncertainty or | Possibly important | Probably no important | No important uncertainty or |  |        |                     |              |

|                           | JUDGEMENT             |                                   |                                                                 |                                  |                         |        |                     | IMPLICATIONS |
|---------------------------|-----------------------|-----------------------------------|-----------------------------------------------------------------|----------------------------------|-------------------------|--------|---------------------|--------------|
|                           | variability           | <b>uncertainty or variability</b> | uncertainty or variability                                      | variability                      |                         |        |                     |              |
| <b>BALANCE OF EFFECTS</b> | Favors the comparison | Probably favors the comparison    | <b>Does not favor either the intervention or the comparison</b> | Probably favors the intervention | Favors the intervention | Varies | Don't know          |              |
| <b>RESOURCES REQUIRED</b> | Large costs           | Moderate costs                    | <b>Negligible costs and savings</b>                             | Moderate savings                 | Large savings           | Varies | Don't know          |              |
| <b>COST EFFECTIVENESS</b> | Favors the comparison | Probably favors the comparison    | <b>Does not favor either the intervention or the comparison</b> | Probably favors the intervention | Favors the intervention | Varies | No included studies |              |
| <b>EQUITY</b>             | Reduced               | Probably reduced                  | <b>Probably no impact</b>                                       | Probably increased               | Increased               | Varies | Don't know          |              |
| <b>ACCEPTABILITY</b>      | No                    | Probably no                       | <b>Probably yes</b>                                             | Yes                              |                         | Varies | Don't know          |              |
| <b>FEASIBILITY</b>        | No                    | Probably no                       | <b>Probably yes</b>                                             | Yes                              |                         | Varies | Don't know          |              |



## Conclusions

### In patients with *M. xenopi* pulmonary disease, should a two, three or four-drug regimen be used for treatment?

| TYPE OF RECOMMENDATION               | Strong recommendation against the intervention                                                                                                                                                                                                                                                                                                                                                                                                                                   | Conditional recommendation against the intervention | Conditional recommendation for either the intervention or the comparison | Conditional recommendation for the intervention | Strong recommendation for the intervention |
|--------------------------------------|----------------------------------------------------------------------------------------------------------------------------------------------------------------------------------------------------------------------------------------------------------------------------------------------------------------------------------------------------------------------------------------------------------------------------------------------------------------------------------|-----------------------------------------------------|--------------------------------------------------------------------------|-------------------------------------------------|--------------------------------------------|
|                                      | ○                                                                                                                                                                                                                                                                                                                                                                                                                                                                                | ●                                                   | ○                                                                        | ○                                               | ○                                          |
| <b>RECOMMENDATION</b>                | <p>In patients with <i>M. xenopi</i> pulmonary disease, we recommend a daily regimen that includes at least three drugs: rifampicin, ethambutol, and either a macrolide and/or a fluoroquinolone (e.g. moxifloxacin) (conditional recommendation, very low confidence in estimates of effect). (3 Strong, 13 Conditional, 2 Abstain).</p> <p>The panel members voted for a conditional recommendation for the comparison.</p>                                                    |                                                     |                                                                          |                                                 |                                            |
| <b>JUSTIFICATION</b>                 | <p>In animal and <i>in vitro</i> models, regimens of rifampicin, ethambutol, and either clarithromycin or moxifloxacin are efficacious.</p> <p>Given the very high mortality with <i>M. xenopi</i>, some members of expert panel felt the large risk of treatment failure with a two drug regimen warranted a strong recommendation for a three drug treatment regimen. However, the majority of the members voted for a conditional recommendation for three or more drugs.</p> |                                                     |                                                                          |                                                 |                                            |
| <b>SUBGROUP CONSIDERATIONS</b>       |                                                                                                                                                                                                                                                                                                                                                                                                                                                                                  |                                                     |                                                                          |                                                 |                                            |
| <b>IMPLEMENTATION CONSIDERATIONS</b> | Moxifloxacin may not be available in all settings and activity of gemifloxacin or gatifloxacin has not been studied                                                                                                                                                                                                                                                                                                                                                              |                                                     |                                                                          |                                                 |                                            |
| <b>MONITORING AND EVALUATION</b>     | ECG for QTc prolongation, tendinopathy                                                                                                                                                                                                                                                                                                                                                                                                                                           |                                                     |                                                                          |                                                 |                                            |
| <b>RESEARCH PRIORITIES</b>           | Clinical trials of rifampin/ethambutol/azithromycin vs. rifampin/ethambutol/moxifloxacin vs. rifampin/ethambutol/azithromycin/moxifloxacin.                                                                                                                                                                                                                                                                                                                                      |                                                     |                                                                          |                                                 |                                            |

|  |                                                                   |
|--|-------------------------------------------------------------------|
|  | Clinical trials of a three times weekly regimen vs daily regimen. |
|--|-------------------------------------------------------------------|

## Table E4.17. Question XVII

In patients with *M. xenopi* pulmonary disease, should amikacin or streptomycin be included in the treatment regimen?

|                       |                                                                                                                                                    |
|-----------------------|----------------------------------------------------------------------------------------------------------------------------------------------------|
| <b>POPULATION:</b>    | M <i>xenopi</i> pulmonary infection                                                                                                                |
| <b>INTERVENTION:</b>  | a treatment regimen with a parenteral agent                                                                                                        |
| <b>COMPARISON:</b>    | a treatment regimen without a parenteral agent                                                                                                     |
| <b>MAIN OUTCOMES:</b> | Cure of NTM disease; Death; Recurrence (relapse); Quality of life; Culture conversion; Adverse drug effects; Development of antibiotic resistance; |

## Assessment

|                   | JUDGEMENT                                                                                                                                                                                                               | RESEARCH EVIDENCE                                                     |                                        |                      |                          |                              | ADDITIONAL CONSIDERATIONS                                                                                                                                                                                                                                                                                                                                                                                                                                                                                                                                                                                                                                                                    |
|-------------------|-------------------------------------------------------------------------------------------------------------------------------------------------------------------------------------------------------------------------|-----------------------------------------------------------------------|----------------------------------------|----------------------|--------------------------|------------------------------|----------------------------------------------------------------------------------------------------------------------------------------------------------------------------------------------------------------------------------------------------------------------------------------------------------------------------------------------------------------------------------------------------------------------------------------------------------------------------------------------------------------------------------------------------------------------------------------------------------------------------------------------------------------------------------------------|
| DESIRABLE EFFECTS | <b>How substantial are the desirable anticipated effects?</b> <ul style="list-style-type: none"> <li>○ Trivial</li> <li>○ Small</li> <li>○ Moderate</li> <li>○ Large</li> <li>○ Varies</li> <li>● Don't know</li> </ul> | <b>Parenteral compared to no parenteral agent for M <i>xenopi</i></b> |                                        |                      |                          |                              | <p>A systematic review on <i>M. xenopi</i> outcomes by treatment was published in 2009 (INT J TUBERC LUNG DIS 13(10):1210–1218). With the exception of one clinical trial, all were retrospective case series. The clinical trials did not study injectable agents. The small signal was against aminoglycosides, but the comparison was undoubtedly biased strongly by disease severity.</p> <p>Success rates lower in injectables, lots of confounding by selection bias (used injectables in sicker patients).</p> <p>Until there is better understanding of why mortality is so high with <i>M. xenopi</i> disease, an aggressive <i>M. xenopi</i> therapeutic regimen is warranted.</p> |
|                   |                                                                                                                                                                                                                         | Outcomes                                                              | Anticipated absolute effects* (95% CI) |                      | Relative effect (95% CI) | Nº of participants (studies) | Quality of the evidence (GRADE)                                                                                                                                                                                                                                                                                                                                                                                                                                                                                                                                                                                                                                                              |
|                   |                                                                                                                                                                                                                         |                                                                       | Risk with no parenteral agent          | Risk with Parenteral |                          |                              |                                                                                                                                                                                                                                                                                                                                                                                                                                                                                                                                                                                                                                                                                              |
|                   |                                                                                                                                                                                                                         | Cure of NTM disease - not measured                                    | -                                      | -                    | -                        | -                            | -                                                                                                                                                                                                                                                                                                                                                                                                                                                                                                                                                                                                                                                                                            |
|                   |                                                                                                                                                                                                                         | Death - not measured                                                  | -                                      | -                    | -                        | -                            | -                                                                                                                                                                                                                                                                                                                                                                                                                                                                                                                                                                                                                                                                                            |
|                   |                                                                                                                                                                                                                         | Recurrence (relapse) - not measured                                   | -                                      | -                    | -                        | -                            | -                                                                                                                                                                                                                                                                                                                                                                                                                                                                                                                                                                                                                                                                                            |

|                                                     |                                                                                                                                                                                                                                 | <table><tr><td>Quality of life - not measured</td><td>-</td><td>-</td><td>-</td><td>-</td><td>-</td></tr><tr><td>Culture conversion - not measured</td><td>-</td><td>-</td><td>-</td><td>-</td><td>-</td></tr><tr><td>Adverse drug effects - not measured</td><td>-</td><td>-</td><td>-</td><td>-</td><td>-</td></tr><tr><td>Development of antibiotic resistance - not measured</td><td>-</td><td>-</td><td>-</td><td>-</td><td>-</td></tr><tr><td colspan="6"></td></tr></table>                                                                                                                                                                        | Quality of life - not measured | -                   | -                                 | -                   | -        | - | Culture conversion - not measured | -        | - | -                    | -        | - | Adverse drug effects - not measured | -        | - | -                  | -        | - | Development of antibiotic resistance - not measured | -        | - | -                                    | -        | - |  |  |  |  |  |  | The only data we have are on murine models of M. xenopi infection. In this study, mice treated with parenteral agent (amikacin) have a lower CFU count after 2 months of treatment |
|-----------------------------------------------------|---------------------------------------------------------------------------------------------------------------------------------------------------------------------------------------------------------------------------------|-----------------------------------------------------------------------------------------------------------------------------------------------------------------------------------------------------------------------------------------------------------------------------------------------------------------------------------------------------------------------------------------------------------------------------------------------------------------------------------------------------------------------------------------------------------------------------------------------------------------------------------------------------------|--------------------------------|---------------------|-----------------------------------|---------------------|----------|---|-----------------------------------|----------|---|----------------------|----------|---|-------------------------------------|----------|---|--------------------|----------|---|-----------------------------------------------------|----------|---|--------------------------------------|----------|---|--|--|--|--|--|--|------------------------------------------------------------------------------------------------------------------------------------------------------------------------------------|
| Quality of life - not measured                      | -                                                                                                                                                                                                                               | -                                                                                                                                                                                                                                                                                                                                                                                                                                                                                                                                                                                                                                                         | -                              | -                   | -                                 |                     |          |   |                                   |          |   |                      |          |   |                                     |          |   |                    |          |   |                                                     |          |   |                                      |          |   |  |  |  |  |  |  |                                                                                                                                                                                    |
| Culture conversion - not measured                   | -                                                                                                                                                                                                                               | -                                                                                                                                                                                                                                                                                                                                                                                                                                                                                                                                                                                                                                                         | -                              | -                   | -                                 |                     |          |   |                                   |          |   |                      |          |   |                                     |          |   |                    |          |   |                                                     |          |   |                                      |          |   |  |  |  |  |  |  |                                                                                                                                                                                    |
| Adverse drug effects - not measured                 | -                                                                                                                                                                                                                               | -                                                                                                                                                                                                                                                                                                                                                                                                                                                                                                                                                                                                                                                         | -                              | -                   | -                                 |                     |          |   |                                   |          |   |                      |          |   |                                     |          |   |                    |          |   |                                                     |          |   |                                      |          |   |  |  |  |  |  |  |                                                                                                                                                                                    |
| Development of antibiotic resistance - not measured | -                                                                                                                                                                                                                               | -                                                                                                                                                                                                                                                                                                                                                                                                                                                                                                                                                                                                                                                         | -                              | -                   | -                                 |                     |          |   |                                   |          |   |                      |          |   |                                     |          |   |                    |          |   |                                                     |          |   |                                      |          |   |  |  |  |  |  |  |                                                                                                                                                                                    |
|                                                     |                                                                                                                                                                                                                                 |                                                                                                                                                                                                                                                                                                                                                                                                                                                                                                                                                                                                                                                           |                                |                     |                                   |                     |          |   |                                   |          |   |                      |          |   |                                     |          |   |                    |          |   |                                                     |          |   |                                      |          |   |  |  |  |  |  |  |                                                                                                                                                                                    |
| UNDESIRABLE EFFECTS                                 | <b>How substantial are the undesirable anticipated effects?</b><br><br><div><div><div>○ Large</div><div>○ Moderate</div><div>○ Small</div><div>○ Trivial</div></div><div><div>○ Varies</div><div>● Don't know</div></div></div> |                                                                                                                                                                                                                                                                                                                                                                                                                                                                                                                                                                                                                                                           |                                |                     |                                   |                     |          |   |                                   |          |   |                      |          |   |                                     |          |   |                    |          |   |                                                     |          |   |                                      |          |   |  |  |  |  |  |  |                                                                                                                                                                                    |
| CERTAINTY OF EVIDENCE                               | <b>What is the overall certainty of the evidence of effects?</b><br><br><div><div><div>○ Very low</div><div>○ Low</div><div>○ Moderate</div><div>○ High</div></div><div><div>● No included studies</div></div></div>            | <b>The relative importance or values of the main outcomes of interest:</b> <table><tr><th>Outcome</th><th>Relative importance</th><th>Certainty of the evidence (GRADE)</th></tr><tr><td>Cure of NTM disease</td><td>CRITICAL</td><td>-</td></tr><tr><td>Death</td><td>CRITICAL</td><td>-</td></tr><tr><td>Recurrence (relapse)</td><td>CRITICAL</td><td>-</td></tr><tr><td>Quality of life</td><td>CRITICAL</td><td>-</td></tr><tr><td>Culture conversion</td><td>CRITICAL</td><td>-</td></tr><tr><td>Adverse drug effects</td><td>CRITICAL</td><td>-</td></tr><tr><td>Development of antibiotic resistance</td><td>CRITICAL</td><td>-</td></tr></table> | Outcome                        | Relative importance | Certainty of the evidence (GRADE) | Cure of NTM disease | CRITICAL | - | Death                             | CRITICAL | - | Recurrence (relapse) | CRITICAL | - | Quality of life                     | CRITICAL | - | Culture conversion | CRITICAL | - | Adverse drug effects                                | CRITICAL | - | Development of antibiotic resistance | CRITICAL | - |  |  |  |  |  |  |                                                                                                                                                                                    |
| Outcome                                             | Relative importance                                                                                                                                                                                                             | Certainty of the evidence (GRADE)                                                                                                                                                                                                                                                                                                                                                                                                                                                                                                                                                                                                                         |                                |                     |                                   |                     |          |   |                                   |          |   |                      |          |   |                                     |          |   |                    |          |   |                                                     |          |   |                                      |          |   |  |  |  |  |  |  |                                                                                                                                                                                    |
| Cure of NTM disease                                 | CRITICAL                                                                                                                                                                                                                        | -                                                                                                                                                                                                                                                                                                                                                                                                                                                                                                                                                                                                                                                         |                                |                     |                                   |                     |          |   |                                   |          |   |                      |          |   |                                     |          |   |                    |          |   |                                                     |          |   |                                      |          |   |  |  |  |  |  |  |                                                                                                                                                                                    |
| Death                                               | CRITICAL                                                                                                                                                                                                                        | -                                                                                                                                                                                                                                                                                                                                                                                                                                                                                                                                                                                                                                                         |                                |                     |                                   |                     |          |   |                                   |          |   |                      |          |   |                                     |          |   |                    |          |   |                                                     |          |   |                                      |          |   |  |  |  |  |  |  |                                                                                                                                                                                    |
| Recurrence (relapse)                                | CRITICAL                                                                                                                                                                                                                        | -                                                                                                                                                                                                                                                                                                                                                                                                                                                                                                                                                                                                                                                         |                                |                     |                                   |                     |          |   |                                   |          |   |                      |          |   |                                     |          |   |                    |          |   |                                                     |          |   |                                      |          |   |  |  |  |  |  |  |                                                                                                                                                                                    |
| Quality of life                                     | CRITICAL                                                                                                                                                                                                                        | -                                                                                                                                                                                                                                                                                                                                                                                                                                                                                                                                                                                                                                                         |                                |                     |                                   |                     |          |   |                                   |          |   |                      |          |   |                                     |          |   |                    |          |   |                                                     |          |   |                                      |          |   |  |  |  |  |  |  |                                                                                                                                                                                    |
| Culture conversion                                  | CRITICAL                                                                                                                                                                                                                        | -                                                                                                                                                                                                                                                                                                                                                                                                                                                                                                                                                                                                                                                         |                                |                     |                                   |                     |          |   |                                   |          |   |                      |          |   |                                     |          |   |                    |          |   |                                                     |          |   |                                      |          |   |  |  |  |  |  |  |                                                                                                                                                                                    |
| Adverse drug effects                                | CRITICAL                                                                                                                                                                                                                        | -                                                                                                                                                                                                                                                                                                                                                                                                                                                                                                                                                                                                                                                         |                                |                     |                                   |                     |          |   |                                   |          |   |                      |          |   |                                     |          |   |                    |          |   |                                                     |          |   |                                      |          |   |  |  |  |  |  |  |                                                                                                                                                                                    |
| Development of antibiotic resistance                | CRITICAL                                                                                                                                                                                                                        | -                                                                                                                                                                                                                                                                                                                                                                                                                                                                                                                                                                                                                                                         |                                |                     |                                   |                     |          |   |                                   |          |   |                      |          |   |                                     |          |   |                    |          |   |                                                     |          |   |                                      |          |   |  |  |  |  |  |  |                                                                                                                                                                                    |
| VALUES                                              | <b>Is there important uncertainty about or variability in how much people value the main outcomes?</b><br><br><div><div><div>○ Important uncertainty or variability</div></div></div>                                           | Values and preferences:<br><br>Three relevant studies were identified that provide data on patient values and                                                                                                                                                                                                                                                                                                                                                                                                                                                                                                                                             |                                |                     |                                   |                     |          |   |                                   |          |   |                      |          |   |                                     |          |   |                    |          |   |                                                     |          |   |                                      |          |   |  |  |  |  |  |  |                                                                                                                                                                                    |

|                    |                                                                                                                                                                                                                                                                                                                                                                                                                                   |                                                                                                                                                                                                                                                                                                                                                                                                                                                                                                                                                                                                                                                                                                                                                                                                                                                                                                                                                                                                                                                            |  |
|--------------------|-----------------------------------------------------------------------------------------------------------------------------------------------------------------------------------------------------------------------------------------------------------------------------------------------------------------------------------------------------------------------------------------------------------------------------------|------------------------------------------------------------------------------------------------------------------------------------------------------------------------------------------------------------------------------------------------------------------------------------------------------------------------------------------------------------------------------------------------------------------------------------------------------------------------------------------------------------------------------------------------------------------------------------------------------------------------------------------------------------------------------------------------------------------------------------------------------------------------------------------------------------------------------------------------------------------------------------------------------------------------------------------------------------------------------------------------------------------------------------------------------------|--|
|                    | <ul style="list-style-type: none"> <li>● Possibly important uncertainty or variability</li> <li>○ Probably no important uncertainty or variability</li> <li>○ No important uncertainty or variability</li> </ul>                                                                                                                                                                                                                  | <p>preferences:</p> <p>Mehta and Marras, 2011 evaluated the impact of pulmonary NTM on health-related quality of life. In this study, patients with pulmonary NTM had significantly impaired health-related quality of life with two QOL measures significantly lower than historical normal controls. Multivariable analysis showed an association between QOL scores and lung function</p> <p>Hong, et al, 2014 also evaluated the impact of pulmonary NTM on health-related quality of life. This was a direct comparison between patients with NTM disease and healthy subjects and found patients with NTM reported more health status issues and anxiety/depression issues than healthy controls. Lung function was also independently associated with QOL scores.</p> <p>Czaja, et al 2015 evaluated change in quality of life in response to various treatment regimens for <i>M. abscessus</i> (many patients had coinfection with MAC or Pseudomonas). Mean QOL score was significantly improved after treatment at 3, 6, 12, and 24 months.</p> |  |
| BALANCE OF EFFECTS | <p><b>Does the balance between desirable and undesirable effects favor the intervention or the comparison?</b></p> <ul style="list-style-type: none"> <li>○ Favors the comparison</li> <li>○ Probably favors the comparison</li> <li>○ Does not favor either the intervention or the comparison</li> <li>○ Probably favors the intervention</li> <li>○ Favors the intervention</li> <li>○ Varies</li> <li>● Don't know</li> </ul> | No research evidence was identified.                                                                                                                                                                                                                                                                                                                                                                                                                                                                                                                                                                                                                                                                                                                                                                                                                                                                                                                                                                                                                       |  |
| RESOURCES REQUIRED | <p><b>How large are the resource requirements (costs)?</b></p> <ul style="list-style-type: none"> <li>○ Large costs</li> <li>● Moderate costs</li> <li>○ Negligible costs and savings</li> <li>○ Moderate savings</li> <li>○ Large savings</li> <li>○ Varies</li> <li>○ Don't know</li> </ul>                                                                                                                                     | No research evidence was identified.                                                                                                                                                                                                                                                                                                                                                                                                                                                                                                                                                                                                                                                                                                                                                                                                                                                                                                                                                                                                                       |  |

|                    |                                                                                                                                                                                                                                                                                                                                                                                                                                 |                                      |  |
|--------------------|---------------------------------------------------------------------------------------------------------------------------------------------------------------------------------------------------------------------------------------------------------------------------------------------------------------------------------------------------------------------------------------------------------------------------------|--------------------------------------|--|
| COST EFFECTIVENESS | <p><b>Does the cost-effectiveness of the intervention favor the intervention or the comparison?</b></p> <ul style="list-style-type: none"> <li>○ Favors the comparison</li> <li>○ Probably favors the comparison</li> <li>○ Does not favor either the intervention or the comparison</li> <li>○ Probably favors the intervention</li> <li>○ Favors the intervention</li> <li>○ Varies</li> <li>● No included studies</li> </ul> | No research evidence was identified. |  |
| EQUITY             | <p><b>What would be the impact on health equity?</b></p> <ul style="list-style-type: none"> <li>○ Reduced</li> <li>● Probably reduced</li> <li>○ Probably no impact</li> <li>○ Probably increased</li> <li>○ Increased</li> <li>○ Varies</li> <li>○ Don't know</li> </ul>                                                                                                                                                       | No research evidence was identified. |  |
| ACCEPTABILITY      | <p><b>Is the intervention acceptable to key stakeholders?</b></p> <ul style="list-style-type: none"> <li>○ No</li> <li>○ Probably no</li> <li>● Probably yes</li> <li>○ Yes</li> <li>○ Varies</li> <li>○ Don't know</li> </ul>                                                                                                                                                                                                  | No research evidence was identified. |  |
| FEASIBILITY        | <p><b>Is the intervention feasible to implement?</b></p> <ul style="list-style-type: none"> <li>○ No</li> <li>○ Probably no</li> <li>○ Probably yes</li> </ul>                                                                                                                                                                                                                                                                  | No research evidence was identified. |  |

|  |              |  |  |
|--|--------------|--|--|
|  | ○ Yes        |  |  |
|  | ● Varies     |  |  |
|  | ○ Don't know |  |  |

## Summary of judgments

|                              | JUDGEMENT                            |                                               |                                                          |                                         |                         |        |                     | IMPLICATIONS |
|------------------------------|--------------------------------------|-----------------------------------------------|----------------------------------------------------------|-----------------------------------------|-------------------------|--------|---------------------|--------------|
| <b>DESIRABLE EFFECTS</b>     | Trivial                              | Small                                         | Moderate                                                 | Large                                   |                         | Varies | Don't know          |              |
| <b>UNDESIRABLE EFFECTS</b>   | Large                                | Moderate                                      | Small                                                    | Trivial                                 |                         | Varies | Don't know          |              |
| <b>CERTAINTY OF EVIDENCE</b> | Very low                             | Low                                           | Moderate                                                 | High                                    |                         |        | No included studies |              |
| <b>VALUES</b>                | Important uncertainty or variability | Possibly important uncertainty or variability | Probably no important uncertainty or variability         | No important uncertainty or variability |                         |        |                     |              |
| <b>BALANCE OF EFFECTS</b>    | Favors the comparison                | Probably favors the comparison                | Does not favor either the intervention or the comparison | Probably favors the intervention        | Favors the intervention | Varies | Don't know          |              |
| <b>RESOURCES REQUIRED</b>    | Large costs                          | Moderate costs                                | Negligible costs and savings                             | Moderate savings                        | Large savings           | Varies | Don't know          |              |
| <b>COST EFFECTIVENESS</b>    | Favors the comparison                | Probably favors the comparison                | Does not favor either the intervention or the comparison | Probably favors the intervention        | Favors the intervention | Varies | No included studies |              |

|                      | JUDGEMENT |                         |                     |                    |           |               |            | IMPLICATIONS |
|----------------------|-----------|-------------------------|---------------------|--------------------|-----------|---------------|------------|--------------|
| <b>EQUITY</b>        | Reduced   | <b>Probably reduced</b> | Probably no impact  | Probably increased | Increased | Varies        | Don't know |              |
| <b>ACCEPTABILITY</b> | No        | Probably no             | <b>Probably yes</b> | Yes                |           | Varies        | Don't know |              |
| <b>FEASIBILITY</b>   | No        | Probably no             | Probably yes        | Yes                |           | <b>Varies</b> | Don't know |              |

## Conclusions

**In patients with *M. xenopi* pulmonary disease, should amikacin or streptomycin be included in the treatment regimen?**

|                               |                                                                                                                                                                                                                                                                                                                                                                                            |                                                              |                                                                                   |                                                          |                                                     |
|-------------------------------|--------------------------------------------------------------------------------------------------------------------------------------------------------------------------------------------------------------------------------------------------------------------------------------------------------------------------------------------------------------------------------------------|--------------------------------------------------------------|-----------------------------------------------------------------------------------|----------------------------------------------------------|-----------------------------------------------------|
| <b>TYPE OF RECOMMENDATION</b> | Strong recommendation against the intervention<br><br>○                                                                                                                                                                                                                                                                                                                                    | Conditional recommendation against the intervention<br><br>○ | Conditional recommendation for either the intervention or the comparison<br><br>○ | Conditional recommendation for the intervention<br><br>● | Strong recommendation for the intervention<br><br>○ |
| <b>RECOMMENDATION</b>         | <p>In patients with fibro-cavitary or advanced/severe bronchiectatic <i>M. xenopi</i> pulmonary disease, we suggest adding parenteral amikacin to the treatment regimen and obtaining expert consultation. (conditional recommendation, very low confidence in estimates of effect).</p> <p>The panel members voted unanimously for a conditional recommendation for the intervention.</p> |                                                              |                                                                                   |                                                          |                                                     |
| <b>JUSTIFICATION</b>          | <p>Barring compelling evidence to the contrary, <i>M. xenopi</i> patients should be treated aggressively given the high morbidity and mortality of the disease.</p> <p>In murine models of <i>M. xenopi</i> infection, mice treated with amikacin have a lower CFU count after 2 months of treatment.</p>                                                                                  |                                                              |                                                                                   |                                                          |                                                     |



|                                      |                                                                              |
|--------------------------------------|------------------------------------------------------------------------------|
| <b>SUBGROUP CONSIDERATIONS</b>       |                                                                              |
| <b>IMPLEMENTATION CONSIDERATIONS</b> |                                                                              |
| <b>MONITORING AND EVALUATION</b>     | renal function, audiometry (see monitoring section)                          |
| <b>RESEARCH PRIORITIES</b>           | Randomized study comparing 3 drug regimen with and without an aminoglycoside |

Table E4.18. Question XVIII

| In patients with <i>M. xenopi</i> pulmonary disease, should treatment be continued for less than 12 months or 12 or more months after culture conversion? |                                                                                                                                  |
|-----------------------------------------------------------------------------------------------------------------------------------------------------------|----------------------------------------------------------------------------------------------------------------------------------|
| POPULATION:                                                                                                                                               | Mycobacterium xenopi pulmonary disease                                                                                           |
| INTERVENTION:                                                                                                                                             | <12 months of treatment after culture negativity                                                                                 |
| COMPARISON:                                                                                                                                               | >/= 12 months of treatment after culture negativity                                                                              |
| MAIN OUTCOMES:                                                                                                                                            | Cure of NTM; Recurrence; Culture conversion; Quality of life; Development of antibiotic resistance; Death; Adverse drug effects; |

Assessment

|                   | JUDGEMENT                                                                                                                                                                                                                                               | RESEARCH EVIDENCE                                          |                                        |                 |                    |                | ADDITIONAL CONSIDERATIONS                                                                                                                                                                                                                                                   |
|-------------------|---------------------------------------------------------------------------------------------------------------------------------------------------------------------------------------------------------------------------------------------------------|------------------------------------------------------------|----------------------------------------|-----------------|--------------------|----------------|-----------------------------------------------------------------------------------------------------------------------------------------------------------------------------------------------------------------------------------------------------------------------------|
| DESIRABLE EFFECTS | <b>How substantial are the desirable anticipated effects?</b> <ul style="list-style-type: none"><li>● Trivial<ul style="list-style-type: none"><li>○ Small</li><li>○ Moderate</li><li>○ Large</li></ul></li><li>○ Varies</li><li>○ Don't know</li></ul> | <12 months compared to >12 months for Mycobacterium xenopi |                                        |                 |                    |                | Because of the apparent very high mortality with M xenopi disease, insuring adequate therapy is important. Without compelling evidence, and with the potential for significant morbidity and mortality with untreated disease, a conservative approach is likely warranted. |
|                   |                                                                                                                                                                                                                                                         | Outcomes                                                   | Anticipated absolute effects* (95% CI) | Relative effect | Nº of participants | Quality of the |                                                                                                                                                                                                                                                                             |
|                   |                                                                                                                                                                                                                                                         |                                                            |                                        |                 |                    |                |                                                                                                                                                                                                                                                                             |

| UNDESIRABLE EFFECTS                 | <b>How substantial are the undesirable anticipated effects?</b> <ul style="list-style-type: none"><li>○ Large</li><li>○ Moderate</li><li>○ Small</li><li>○ Trivial</li><li>○ Varies</li><li>● Don't know</li></ul> | <table><tr><td></td><td><b>Risk with &gt;12 months</b></td><td><b>Risk with &lt;12 months</b></td><td>(95% CI)</td><td>(studies)</td><td>evidence (GRADE)</td></tr><tr><td>Cure of NTM</td><td>481 per 1000</td><td><b>260 per 1000</b><br/>(125 to 544)</td><td><b>RR 0.54</b><br/>(0.26 to 1.13)</td><td>54<br/>(2 observational studies)</td><td>⊕○○○<br/>VERY LOW<br/>1,2,3</td></tr><tr><td>Recurrence</td><td>370 per 1000</td><td><b>215 per 1000</b><br/>(96 to 481)</td><td><b>RR 0.58</b><br/>(0.26 to 1.30)</td><td>54<br/>(2 observational studies)</td><td>⊕○○○<br/>VERY LOW<br/>1,2,3</td></tr><tr><td>Culture conversion</td><td>571 per 1000</td><td><b>503 per 1000</b><br/>(154 to 1000)</td><td><b>RR 0.88</b><br/>(0.27 to 2.82)</td><td>11<br/>(1 observational study)</td><td>⊕○○○<br/>VERY LOW<br/>1,2,3</td></tr><tr><td>Quality of life - not measured</td><td>-</td><td>-</td><td>-</td><td>-</td><td>-</td></tr><tr><td>Development of antibiotic resistance - not measured</td><td>-</td><td>-</td><td>-</td><td>-</td><td>-</td></tr><tr><td>Death - not reported</td><td>-</td><td>-</td><td>-</td><td>-</td><td>-</td></tr><tr><td>Adverse drug effects - not reported</td><td>-</td><td>-</td><td>-</td><td>-</td><td>-</td></tr></table> |                                      | <b>Risk with &gt;12 months</b>   | <b>Risk with &lt;12 months</b>    | (95% CI)                  | (studies) | evidence (GRADE) | Cure of NTM | 481 per 1000 | <b>260 per 1000</b><br>(125 to 544) | <b>RR 0.54</b><br>(0.26 to 1.13) | 54<br>(2 observational studies) | ⊕○○○<br>VERY LOW<br>1,2,3 | Recurrence | 370 per 1000 | <b>215 per 1000</b><br>(96 to 481) | <b>RR 0.58</b><br>(0.26 to 1.30) | 54<br>(2 observational studies) | ⊕○○○<br>VERY LOW<br>1,2,3 | Culture conversion | 571 per 1000 | <b>503 per 1000</b><br>(154 to 1000) | <b>RR 0.88</b><br>(0.27 to 2.82) | 11<br>(1 observational study) | ⊕○○○<br>VERY LOW<br>1,2,3 | Quality of life - not measured | - | - | - | - | - | Development of antibiotic resistance - not measured | - | - | - | - | - | Death - not reported | - | - | - | - | - | Adverse drug effects - not reported | - | - | - | - | - |  |
|-------------------------------------|--------------------------------------------------------------------------------------------------------------------------------------------------------------------------------------------------------------------|---------------------------------------------------------------------------------------------------------------------------------------------------------------------------------------------------------------------------------------------------------------------------------------------------------------------------------------------------------------------------------------------------------------------------------------------------------------------------------------------------------------------------------------------------------------------------------------------------------------------------------------------------------------------------------------------------------------------------------------------------------------------------------------------------------------------------------------------------------------------------------------------------------------------------------------------------------------------------------------------------------------------------------------------------------------------------------------------------------------------------------------------------------------------------------------------------------------------------------------------------------------------------|--------------------------------------|----------------------------------|-----------------------------------|---------------------------|-----------|------------------|-------------|--------------|-------------------------------------|----------------------------------|---------------------------------|---------------------------|------------|--------------|------------------------------------|----------------------------------|---------------------------------|---------------------------|--------------------|--------------|--------------------------------------|----------------------------------|-------------------------------|---------------------------|--------------------------------|---|---|---|---|---|-----------------------------------------------------|---|---|---|---|---|----------------------|---|---|---|---|---|-------------------------------------|---|---|---|---|---|--|
|                                     |                                                                                                                                                                                                                    | <b>Risk with &gt;12 months</b>                                                                                                                                                                                                                                                                                                                                                                                                                                                                                                                                                                                                                                                                                                                                                                                                                                                                                                                                                                                                                                                                                                                                                                                                                                            | <b>Risk with &lt;12 months</b>       | (95% CI)                         | (studies)                         | evidence (GRADE)          |           |                  |             |              |                                     |                                  |                                 |                           |            |              |                                    |                                  |                                 |                           |                    |              |                                      |                                  |                               |                           |                                |   |   |   |   |   |                                                     |   |   |   |   |   |                      |   |   |   |   |   |                                     |   |   |   |   |   |  |
|                                     | Cure of NTM                                                                                                                                                                                                        | 481 per 1000                                                                                                                                                                                                                                                                                                                                                                                                                                                                                                                                                                                                                                                                                                                                                                                                                                                                                                                                                                                                                                                                                                                                                                                                                                                              | <b>260 per 1000</b><br>(125 to 544)  | <b>RR 0.54</b><br>(0.26 to 1.13) | 54<br>(2 observational studies)   | ⊕○○○<br>VERY LOW<br>1,2,3 |           |                  |             |              |                                     |                                  |                                 |                           |            |              |                                    |                                  |                                 |                           |                    |              |                                      |                                  |                               |                           |                                |   |   |   |   |   |                                                     |   |   |   |   |   |                      |   |   |   |   |   |                                     |   |   |   |   |   |  |
|                                     | Recurrence                                                                                                                                                                                                         | 370 per 1000                                                                                                                                                                                                                                                                                                                                                                                                                                                                                                                                                                                                                                                                                                                                                                                                                                                                                                                                                                                                                                                                                                                                                                                                                                                              | <b>215 per 1000</b><br>(96 to 481)   | <b>RR 0.58</b><br>(0.26 to 1.30) | 54<br>(2 observational studies)   | ⊕○○○<br>VERY LOW<br>1,2,3 |           |                  |             |              |                                     |                                  |                                 |                           |            |              |                                    |                                  |                                 |                           |                    |              |                                      |                                  |                               |                           |                                |   |   |   |   |   |                                                     |   |   |   |   |   |                      |   |   |   |   |   |                                     |   |   |   |   |   |  |
|                                     | Culture conversion                                                                                                                                                                                                 | 571 per 1000                                                                                                                                                                                                                                                                                                                                                                                                                                                                                                                                                                                                                                                                                                                                                                                                                                                                                                                                                                                                                                                                                                                                                                                                                                                              | <b>503 per 1000</b><br>(154 to 1000) | <b>RR 0.88</b><br>(0.27 to 2.82) | 11<br>(1 observational study)     | ⊕○○○<br>VERY LOW<br>1,2,3 |           |                  |             |              |                                     |                                  |                                 |                           |            |              |                                    |                                  |                                 |                           |                    |              |                                      |                                  |                               |                           |                                |   |   |   |   |   |                                                     |   |   |   |   |   |                      |   |   |   |   |   |                                     |   |   |   |   |   |  |
|                                     | Quality of life - not measured                                                                                                                                                                                     | -                                                                                                                                                                                                                                                                                                                                                                                                                                                                                                                                                                                                                                                                                                                                                                                                                                                                                                                                                                                                                                                                                                                                                                                                                                                                         | -                                    | -                                | -                                 | -                         |           |                  |             |              |                                     |                                  |                                 |                           |            |              |                                    |                                  |                                 |                           |                    |              |                                      |                                  |                               |                           |                                |   |   |   |   |   |                                                     |   |   |   |   |   |                      |   |   |   |   |   |                                     |   |   |   |   |   |  |
|                                     | Development of antibiotic resistance - not measured                                                                                                                                                                | -                                                                                                                                                                                                                                                                                                                                                                                                                                                                                                                                                                                                                                                                                                                                                                                                                                                                                                                                                                                                                                                                                                                                                                                                                                                                         | -                                    | -                                | -                                 | -                         |           |                  |             |              |                                     |                                  |                                 |                           |            |              |                                    |                                  |                                 |                           |                    |              |                                      |                                  |                               |                           |                                |   |   |   |   |   |                                                     |   |   |   |   |   |                      |   |   |   |   |   |                                     |   |   |   |   |   |  |
|                                     | Death - not reported                                                                                                                                                                                               | -                                                                                                                                                                                                                                                                                                                                                                                                                                                                                                                                                                                                                                                                                                                                                                                                                                                                                                                                                                                                                                                                                                                                                                                                                                                                         | -                                    | -                                | -                                 | -                         |           |                  |             |              |                                     |                                  |                                 |                           |            |              |                                    |                                  |                                 |                           |                    |              |                                      |                                  |                               |                           |                                |   |   |   |   |   |                                                     |   |   |   |   |   |                      |   |   |   |   |   |                                     |   |   |   |   |   |  |
| Adverse drug effects - not reported | -                                                                                                                                                                                                                  | -                                                                                                                                                                                                                                                                                                                                                                                                                                                                                                                                                                                                                                                                                                                                                                                                                                                                                                                                                                                                                                                                                                                                                                                                                                                                         | -                                    | -                                | -                                 |                           |           |                  |             |              |                                     |                                  |                                 |                           |            |              |                                    |                                  |                                 |                           |                    |              |                                      |                                  |                               |                           |                                |   |   |   |   |   |                                                     |   |   |   |   |   |                      |   |   |   |   |   |                                     |   |   |   |   |   |  |
| CERTAINTY OF EVIDENCE               | <b>What is the overall certainty of the evidence of effects?</b> <ul style="list-style-type: none"><li>● Very low</li><li>○ Low</li><li>○ Moderate</li><li>○ High</li><li>○ No included studies</li></ul>          | <b>The relative importance or values of the main outcomes of interest:</b> <table><tr><th>Outcome</th><th>Relative importance</th><th>Certainty of the evidence (GRADE)</th></tr><tr><td>Cure of NTM</td><td>CRITICAL</td><td>⊕○○○<br/>VERY LOW</td></tr></table>                                                                                                                                                                                                                                                                                                                                                                                                                                                                                                                                                                                                                                                                                                                                                                                                                                                                                                                                                                                                         | Outcome                              | Relative importance              | Certainty of the evidence (GRADE) | Cure of NTM               | CRITICAL  | ⊕○○○<br>VERY LOW |             |              |                                     |                                  |                                 |                           |            |              |                                    |                                  |                                 |                           |                    |              |                                      |                                  |                               |                           |                                |   |   |   |   |   |                                                     |   |   |   |   |   |                      |   |   |   |   |   |                                     |   |   |   |   |   |  |
|                                     | Outcome                                                                                                                                                                                                            | Relative importance                                                                                                                                                                                                                                                                                                                                                                                                                                                                                                                                                                                                                                                                                                                                                                                                                                                                                                                                                                                                                                                                                                                                                                                                                                                       | Certainty of the evidence (GRADE)    |                                  |                                   |                           |           |                  |             |              |                                     |                                  |                                 |                           |            |              |                                    |                                  |                                 |                           |                    |              |                                      |                                  |                               |                           |                                |   |   |   |   |   |                                                     |   |   |   |   |   |                      |   |   |   |   |   |                                     |   |   |   |   |   |  |
| Cure of NTM                         | CRITICAL                                                                                                                                                                                                           | ⊕○○○<br>VERY LOW                                                                                                                                                                                                                                                                                                                                                                                                                                                                                                                                                                                                                                                                                                                                                                                                                                                                                                                                                                                                                                                                                                                                                                                                                                                          |                                      |                                  |                                   |                           |           |                  |             |              |                                     |                                  |                                 |                           |            |              |                                    |                                  |                                 |                           |                    |              |                                      |                                  |                               |                           |                                |   |   |   |   |   |                                                     |   |   |   |   |   |                      |   |   |   |   |   |                                     |   |   |   |   |   |  |

|        |                                                                                                                                                                                                                                                                                                                                                                                |                                                                                                                                                                                                                                                                                                                                                                                                                                                                                                                                                                                                                                                                                                                                                                                                                                                                                                                                                                                                                                                                                                                                                                                 |          |                  |  |
|--------|--------------------------------------------------------------------------------------------------------------------------------------------------------------------------------------------------------------------------------------------------------------------------------------------------------------------------------------------------------------------------------|---------------------------------------------------------------------------------------------------------------------------------------------------------------------------------------------------------------------------------------------------------------------------------------------------------------------------------------------------------------------------------------------------------------------------------------------------------------------------------------------------------------------------------------------------------------------------------------------------------------------------------------------------------------------------------------------------------------------------------------------------------------------------------------------------------------------------------------------------------------------------------------------------------------------------------------------------------------------------------------------------------------------------------------------------------------------------------------------------------------------------------------------------------------------------------|----------|------------------|--|
|        |                                                                                                                                                                                                                                                                                                                                                                                | Recurrence                                                                                                                                                                                                                                                                                                                                                                                                                                                                                                                                                                                                                                                                                                                                                                                                                                                                                                                                                                                                                                                                                                                                                                      | CRITICAL | ⊕○○○<br>VERY LOW |  |
|        |                                                                                                                                                                                                                                                                                                                                                                                | Culture conversion                                                                                                                                                                                                                                                                                                                                                                                                                                                                                                                                                                                                                                                                                                                                                                                                                                                                                                                                                                                                                                                                                                                                                              | CRITICAL | ⊕○○○<br>VERY LOW |  |
|        |                                                                                                                                                                                                                                                                                                                                                                                | Quality of life                                                                                                                                                                                                                                                                                                                                                                                                                                                                                                                                                                                                                                                                                                                                                                                                                                                                                                                                                                                                                                                                                                                                                                 | CRITICAL | -                |  |
|        |                                                                                                                                                                                                                                                                                                                                                                                | Development of antibiotic resistance                                                                                                                                                                                                                                                                                                                                                                                                                                                                                                                                                                                                                                                                                                                                                                                                                                                                                                                                                                                                                                                                                                                                            | CRITICAL | -                |  |
|        |                                                                                                                                                                                                                                                                                                                                                                                | Death                                                                                                                                                                                                                                                                                                                                                                                                                                                                                                                                                                                                                                                                                                                                                                                                                                                                                                                                                                                                                                                                                                                                                                           | CRITICAL | -                |  |
|        |                                                                                                                                                                                                                                                                                                                                                                                | Adverse drug effects                                                                                                                                                                                                                                                                                                                                                                                                                                                                                                                                                                                                                                                                                                                                                                                                                                                                                                                                                                                                                                                                                                                                                            | CRITICAL | -                |  |
|        |                                                                                                                                                                                                                                                                                                                                                                                |                                                                                                                                                                                                                                                                                                                                                                                                                                                                                                                                                                                                                                                                                                                                                                                                                                                                                                                                                                                                                                                                                                                                                                                 |          |                  |  |
| VALUES | <p><b>Is there important uncertainty about or variability in how much people value the main outcomes?</b></p> <ul style="list-style-type: none"> <li>○ Important uncertainty or variability</li> <li>● Possibly important uncertainty or variability</li> <li>○ Probably no important uncertainty or variability</li> <li>○ No important uncertainty or variability</li> </ul> | <p>Values and preferences:</p> <p>Three relevant studies were identified that provide data on patient values and preferences:</p> <p>Mehta and Marras, 2011 evaluated the impact of pulmonary NTM on health-related quality of life. In this study, patients with pulmonary NTM had significantly impaired health-related quality of life with two QOL measures significantly lower than historical normal controls. Multivariable analysis showed an association between QOL scores and lung function</p> <p>Hong, et al, 2014 also evaluated the impact of pulmonary NTM on health-related quality of life. This was a direct comparison between patients with NTM disease and healthy subjects and found patients with NTM reported more health status issues and anxiety/depression issues than healthy controls. Lung function was also independently associated with QOL scores.</p> <p>Czaja, et al 2015 evaluated change in quality of life in response to various treatment regimens for <i>M. abscessus</i> (many patients had coinfection with MAC or <i>Pseudomonas</i>). Mean QOL score was significantly improved after treatment at 3, 6, 12, and 24 months.</p> |          |                  |  |

**Does the balance between desirable and undesirable effects favor the intervention or the comparison?**

- Favors the comparison
- Probably favors the comparison
- Does not favor either the intervention or the comparison
- Probably favors the intervention
- Favors the intervention
  
- Varies
- Don't know

**<12 months compared to >12 months for Mycobacterium xenopi**

| Outcomes                                            | Anticipated absolute effects* (95% CI) |                                   | Relative effect (95% CI)      | Nº of participants (studies) | Quality of the evidence (GRADE) |
|-----------------------------------------------------|----------------------------------------|-----------------------------------|-------------------------------|------------------------------|---------------------------------|
|                                                     | Risk with >12 months                   | Risk with <12 months              |                               |                              |                                 |
| Cure of NTM                                         | 481 per 1000                           | <b>260 per 1000</b> (125 to 544)  | <b>RR 0.54</b> (0.26 to 1.13) | 54 (2 observational studies) | ⊕○○○<br>VERY LOW<br>1,2,3       |
| Recurrence                                          | 370 per 1000                           | <b>215 per 1000</b> (96 to 481)   | <b>RR 0.58</b> (0.26 to 1.30) | 54 (2 observational studies) | ⊕○○○<br>VERY LOW<br>1,2,3       |
| Culture conversion                                  | 571 per 1000                           | <b>503 per 1000</b> (154 to 1000) | <b>RR 0.88</b> (0.27 to 2.82) | 11 (1 observational study)   | ⊕○○○<br>VERY LOW<br>1,2,3       |
| Quality of life - not measured                      | -                                      | -                                 | -                             | -                            | -                               |
| Development of antibiotic resistance - not measured | -                                      | -                                 | -                             | -                            | -                               |
| Death - not reported                                | -                                      | -                                 | -                             | -                            | -                               |
| Adverse drug effects - not reported                 | -                                      | -                                 | -                             | -                            | -                               |

|                    |                                                                                                                                                                                                                                                                                                                                                                                                                                 |                                      |  |
|--------------------|---------------------------------------------------------------------------------------------------------------------------------------------------------------------------------------------------------------------------------------------------------------------------------------------------------------------------------------------------------------------------------------------------------------------------------|--------------------------------------|--|
| RESOURCES REQUIRED | <p><b>How large are the resource requirements (costs)?</b></p> <ul style="list-style-type: none"> <li>○ Large costs</li> <li>○ Moderate costs</li> <li>○ Negligible costs and savings</li> <li>○ Moderate savings</li> <li>○ Large savings</li> <li>● Varies</li> <li>○ Don't know</li> </ul>                                                                                                                                   | No research evidence was identified. |  |
| COST EFFECTIVENESS | <p><b>Does the cost-effectiveness of the intervention favor the intervention or the comparison?</b></p> <ul style="list-style-type: none"> <li>○ Favors the comparison</li> <li>○ Probably favors the comparison</li> <li>○ Does not favor either the intervention or the comparison</li> <li>○ Probably favors the intervention</li> <li>○ Favors the intervention</li> <li>● Varies</li> <li>○ No included studies</li> </ul> | No research evidence was identified. |  |
| EQUITY             | <p><b>What would be the impact on health equity?</b></p> <ul style="list-style-type: none"> <li>○ Reduced</li> <li>○ Probably reduced</li> <li>● Probably no impact</li> <li>○ Probably increased</li> <li>○ Increased</li> <li>○ Varies</li> <li>○ Don't know</li> </ul>                                                                                                                                                       | No research evidence was identified. |  |
| ACCEPTABILITY      | <p><b>Is the intervention acceptable to key stakeholders?</b></p> <ul style="list-style-type: none"> <li>○ No</li> <li>○ Probably no</li> <li>● Probably yes</li> <li>○ Yes</li> </ul>                                                                                                                                                                                                                                          | No research evidence was identified. |  |

|             |                                                                                                                                                                                                                |                                      |  |
|-------------|----------------------------------------------------------------------------------------------------------------------------------------------------------------------------------------------------------------|--------------------------------------|--|
|             | <ul style="list-style-type: none"> <li>○ Varies</li> <li>○ Don't know</li> </ul>                                                                                                                               |                                      |  |
| FEASIBILITY | <b>Is the intervention feasible to implement?</b> <ul style="list-style-type: none"> <li>○ No</li> <li>○ Probably no</li> <li>● Probably yes</li> <li>○ Yes</li> <li>○ Varies</li> <li>○ Don't know</li> </ul> | No research evidence was identified. |  |

## Summary of judgments

|                       | JUDGEMENT                            |                                               |                                                  |                                         |  |        |                     | IMPLICATIONS |
|-----------------------|--------------------------------------|-----------------------------------------------|--------------------------------------------------|-----------------------------------------|--|--------|---------------------|--------------|
| DESIRABLE EFFECTS     | Trivial                              | Small                                         | Moderate                                         | Large                                   |  | Varies | Don't know          |              |
| UNDESIRABLE EFFECTS   | Large                                | Moderate                                      | Small                                            | Trivial                                 |  | Varies | Don't know          |              |
| CERTAINTY OF EVIDENCE | Very low                             | Low                                           | Moderate                                         | High                                    |  |        | No included studies |              |
| VALUES                | Important uncertainty or variability | Possibly important uncertainty or variability | Probably no important uncertainty or variability | No important uncertainty or variability |  |        |                     |              |

|                           | JUDGEMENT             |                                |                                                                 |                                  |                         |               |                     | IMPLICATIONS |
|---------------------------|-----------------------|--------------------------------|-----------------------------------------------------------------|----------------------------------|-------------------------|---------------|---------------------|--------------|
| <b>BALANCE OF EFFECTS</b> | Favors the comparison | Probably favors the comparison | <b>Does not favor either the intervention or the comparison</b> | Probably favors the intervention | Favors the intervention | Varies        | Don't know          |              |
| <b>RESOURCES REQUIRED</b> | Large costs           | Moderate costs                 | Negligible costs and savings                                    | Moderate savings                 | Large savings           | <b>Varies</b> | Don't know          |              |
| <b>COST EFFECTIVENESS</b> | Favors the comparison | Probably favors the comparison | Does not favor either the intervention or the comparison        | Probably favors the intervention | Favors the intervention | <b>Varies</b> | No included studies |              |
| <b>EQUITY</b>             | Reduced               | Probably reduced               | <b>Probably no impact</b>                                       | Probably increased               | Increased               | Varies        | Don't know          |              |
| <b>ACCEPTABILITY</b>      | No                    | Probably no                    | <b>Probably yes</b>                                             | Yes                              |                         | Varies        | Don't know          |              |
| <b>FEASIBILITY</b>        | No                    | Probably no                    | <b>Probably yes</b>                                             | Yes                              |                         | Varies        | Don't know          |              |



## Conclusions

**In patients with *M. xenopi* pulmonary disease, should treatment be continued for less than 12 months or 12 or more months after culture conversion?**

| TYPE OF RECOMMENDATION        | Strong recommendation against the intervention<br><br>○                                                                                                                                                                                                                                                                       | Conditional recommendation against the intervention<br><br>● | Conditional recommendation for either the intervention or the comparison<br><br>○ | Conditional recommendation for the intervention<br><br>○ | Strong recommendation for the intervention<br><br>○ |
|-------------------------------|-------------------------------------------------------------------------------------------------------------------------------------------------------------------------------------------------------------------------------------------------------------------------------------------------------------------------------|--------------------------------------------------------------|-----------------------------------------------------------------------------------|----------------------------------------------------------|-----------------------------------------------------|
| RECOMMENDATION                | <p>In patients with <i>M. xenopi</i> pulmonary disease, we suggest that treatment be continued for at least 12 months beyond culture conversion (conditional recommendation, very low confidence in estimates of effect).</p> <p>The panel members voted unanimously for a conditional recommendation for the comparison.</p> |                                                              |                                                                                   |                                                          |                                                     |
| JUSTIFICATION                 | <p>Because of the significant morbidity and mortality of untreated <i>M. xenopi</i> disease and without compelling evidence to the contrary, a conservative approach should be undertaken with treatment of at least 12 months beyond culture conversion.</p>                                                                 |                                                              |                                                                                   |                                                          |                                                     |
| SUBGROUP CONSIDERATIONS       |                                                                                                                                                                                                                                                                                                                               |                                                              |                                                                                   |                                                          |                                                     |
| IMPLEMENTATION CONSIDERATIONS |                                                                                                                                                                                                                                                                                                                               |                                                              |                                                                                   |                                                          |                                                     |
| MONITORING AND EVALUATION     |                                                                                                                                                                                                                                                                                                                               |                                                              |                                                                                   |                                                          |                                                     |
| RESEARCH PRIORITIES           |                                                                                                                                                                                                                                                                                                                               |                                                              |                                                                                   |                                                          |                                                     |

## Table E4.19. Question XIX

In patients with *M. abscessus* pulmonary disease, should a macrolide-based regimen or a regimen without a macrolide be used for treatment?

|                       |                                                                                                                                                                              |
|-----------------------|------------------------------------------------------------------------------------------------------------------------------------------------------------------------------|
| <b>POPULATION:</b>    | Mycobacterium abscessus pulmonary infection                                                                                                                                  |
| <b>INTERVENTION:</b>  | a macrolide-containing regimen                                                                                                                                               |
| <b>COMPARISON:</b>    | a non-macrolide containing regimen                                                                                                                                           |
| <b>MAIN OUTCOMES:</b> | Cure of NTM; Death; Recurrence (Relapse); Culture Conversion; Any adverse effect; Withdrawal owing to adverse effect; Development of antibiotic resistance; Quality of life; |

## Assessment

|                   | JUDGEMENT                                                                                                                                          | RESEARCH EVIDENCE                                                                         |                                               |                 |                              |                         | ADDITIONAL CONSIDERATIONS                                                                                                                                                                                              |
|-------------------|----------------------------------------------------------------------------------------------------------------------------------------------------|-------------------------------------------------------------------------------------------|-----------------------------------------------|-----------------|------------------------------|-------------------------|------------------------------------------------------------------------------------------------------------------------------------------------------------------------------------------------------------------------|
| DESIRABLE EFFECTS | <b>How substantial are the desirable anticipated effects?</b><br><br>○ Trivial<br>○ Small<br>○ Moderate<br>○ Large<br><br>○ Varies<br>● Don't know |                                                                                           |                                               |                 |                              |                         | It is important to consider identification of the M abscessus subspecies because of the difference in response to macrolide therapy based on the presence or absence of the inducible macrolide resistance (erm) gene. |
|                   |                                                                                                                                                    | <b>Macrolide compared to No macrolide for Mycobacterium abscessus pulmonary infection</b> |                                               |                 |                              |                         |                                                                                                                                                                                                                        |
|                   |                                                                                                                                                    | Outcomes                                                                                  | <b>Anticipated absolute effects* (95% CI)</b> | Relative effect | Nº of participants (studies) | Quality of the evidence |                                                                                                                                                                                                                        |

**How substantial are the undesirable anticipated effects?**

- Large
- Moderate
- Small
- Trivial
  
- Varies
- Don't know

|                                                     | Risk with No macrolide | Risk with Macrolide        | (95% CI)                      |                              | (GRADE)                 |
|-----------------------------------------------------|------------------------|----------------------------|-------------------------------|------------------------------|-------------------------|
| Cure of NTM                                         | 429 per 1000           | 934 per 1000 (420 to 1000) | <b>RR 2.18</b> (0.98 to 4.84) | 82 (2 observational studies) | ⊕○○○<br>VERY LOW<br>1,2 |
| Death                                               | no data                | 2/65 (3.1%)                | -                             | 65 (1 observational study)   | ⊕○○○<br>VERY LOW<br>2,3 |
| Recurrence (Relapse)                                | no data                | 9/47 (19.1%)               | -                             | 47 (1 observational study)   | ⊕○○○<br>VERY LOW<br>2,3 |
| Culture Conversion                                  | no data                | 47/65 (72.3%)              | -                             | 65 (1 observational study)   | ⊕○○○<br>VERY LOW<br>2,3 |
| Any adverse effect                                  | no data                | 14/65 (21.5%)              | -                             | 65 (1 observational study)   | ⊕○○○<br>VERY LOW<br>2,3 |
| Withdrawal owing to adverse effect                  | no data                | 6/65 (9.2%)                | -                             | 65 (1 observational study)   | ⊕○○○<br>VERY LOW<br>2,3 |
| Development of antibiotic resistance - not measured | no data                | no data                    | -                             | -                            | -                       |
| Quality of life - not measured                      | no data                | no data                    | -                             | -                            | -                       |

| CERTAINTY OF EVIDENCE | <p><b>What is the overall certainty of the evidence of effects?</b></p> <ul style="list-style-type: none"><li>● Very low</li><li>○ Low</li><li>○ Moderate</li><li>○ High</li><li>○ No included studies</li></ul>                                                                                                                                                          | <p><b>The relative importance or values of the main outcomes of interest:</b></p> <table><tr><th>Outcome</th><th>Relative importance</th><th>Certainty of the evidence (GRADE)</th></tr><tr><td>Cure of NTM</td><td>CRITICAL</td><td>⊕○○○<br/>VERY LOW</td></tr><tr><td>Death</td><td>CRITICAL</td><td>⊕○○○<br/>VERY LOW</td></tr><tr><td>Recurrence (Relapse)</td><td>CRITICAL</td><td>⊕○○○<br/>VERY LOW</td></tr><tr><td>Culture Conversion</td><td>CRITICAL</td><td>⊕○○○<br/>VERY LOW</td></tr><tr><td>Any adverse effect</td><td>CRITICAL</td><td>⊕○○○<br/>VERY LOW</td></tr><tr><td>Withdrawal owing to adverse effect</td><td>CRITICAL</td><td>⊕○○○<br/>VERY LOW</td></tr><tr><td>Development of antibiotic resistance</td><td>CRITICAL</td><td>-</td></tr><tr><td>Quality of life</td><td>CRITICAL</td><td>-</td></tr></table>                                                       |                                   |  | Outcome | Relative importance | Certainty of the evidence (GRADE) | Cure of NTM | CRITICAL | ⊕○○○<br>VERY LOW | Death | CRITICAL | ⊕○○○<br>VERY LOW | Recurrence (Relapse) | CRITICAL | ⊕○○○<br>VERY LOW | Culture Conversion | CRITICAL | ⊕○○○<br>VERY LOW | Any adverse effect | CRITICAL | ⊕○○○<br>VERY LOW | Withdrawal owing to adverse effect | CRITICAL | ⊕○○○<br>VERY LOW | Development of antibiotic resistance | CRITICAL | - | Quality of life | CRITICAL | - |
|-----------------------|---------------------------------------------------------------------------------------------------------------------------------------------------------------------------------------------------------------------------------------------------------------------------------------------------------------------------------------------------------------------------|---------------------------------------------------------------------------------------------------------------------------------------------------------------------------------------------------------------------------------------------------------------------------------------------------------------------------------------------------------------------------------------------------------------------------------------------------------------------------------------------------------------------------------------------------------------------------------------------------------------------------------------------------------------------------------------------------------------------------------------------------------------------------------------------------------------------------------------------------------------------------------------------|-----------------------------------|--|---------|---------------------|-----------------------------------|-------------|----------|------------------|-------|----------|------------------|----------------------|----------|------------------|--------------------|----------|------------------|--------------------|----------|------------------|------------------------------------|----------|------------------|--------------------------------------|----------|---|-----------------|----------|---|
|                       | Outcome                                                                                                                                                                                                                                                                                                                                                                   | Relative importance                                                                                                                                                                                                                                                                                                                                                                                                                                                                                                                                                                                                                                                                                                                                                                                                                                                                         | Certainty of the evidence (GRADE) |  |         |                     |                                   |             |          |                  |       |          |                  |                      |          |                  |                    |          |                  |                    |          |                  |                                    |          |                  |                                      |          |   |                 |          |   |
|                       | Cure of NTM                                                                                                                                                                                                                                                                                                                                                               | CRITICAL                                                                                                                                                                                                                                                                                                                                                                                                                                                                                                                                                                                                                                                                                                                                                                                                                                                                                    | ⊕○○○<br>VERY LOW                  |  |         |                     |                                   |             |          |                  |       |          |                  |                      |          |                  |                    |          |                  |                    |          |                  |                                    |          |                  |                                      |          |   |                 |          |   |
|                       | Death                                                                                                                                                                                                                                                                                                                                                                     | CRITICAL                                                                                                                                                                                                                                                                                                                                                                                                                                                                                                                                                                                                                                                                                                                                                                                                                                                                                    | ⊕○○○<br>VERY LOW                  |  |         |                     |                                   |             |          |                  |       |          |                  |                      |          |                  |                    |          |                  |                    |          |                  |                                    |          |                  |                                      |          |   |                 |          |   |
|                       | Recurrence (Relapse)                                                                                                                                                                                                                                                                                                                                                      | CRITICAL                                                                                                                                                                                                                                                                                                                                                                                                                                                                                                                                                                                                                                                                                                                                                                                                                                                                                    | ⊕○○○<br>VERY LOW                  |  |         |                     |                                   |             |          |                  |       |          |                  |                      |          |                  |                    |          |                  |                    |          |                  |                                    |          |                  |                                      |          |   |                 |          |   |
|                       | Culture Conversion                                                                                                                                                                                                                                                                                                                                                        | CRITICAL                                                                                                                                                                                                                                                                                                                                                                                                                                                                                                                                                                                                                                                                                                                                                                                                                                                                                    | ⊕○○○<br>VERY LOW                  |  |         |                     |                                   |             |          |                  |       |          |                  |                      |          |                  |                    |          |                  |                    |          |                  |                                    |          |                  |                                      |          |   |                 |          |   |
|                       | Any adverse effect                                                                                                                                                                                                                                                                                                                                                        | CRITICAL                                                                                                                                                                                                                                                                                                                                                                                                                                                                                                                                                                                                                                                                                                                                                                                                                                                                                    | ⊕○○○<br>VERY LOW                  |  |         |                     |                                   |             |          |                  |       |          |                  |                      |          |                  |                    |          |                  |                    |          |                  |                                    |          |                  |                                      |          |   |                 |          |   |
|                       | Withdrawal owing to adverse effect                                                                                                                                                                                                                                                                                                                                        | CRITICAL                                                                                                                                                                                                                                                                                                                                                                                                                                                                                                                                                                                                                                                                                                                                                                                                                                                                                    | ⊕○○○<br>VERY LOW                  |  |         |                     |                                   |             |          |                  |       |          |                  |                      |          |                  |                    |          |                  |                    |          |                  |                                    |          |                  |                                      |          |   |                 |          |   |
|                       | Development of antibiotic resistance                                                                                                                                                                                                                                                                                                                                      | CRITICAL                                                                                                                                                                                                                                                                                                                                                                                                                                                                                                                                                                                                                                                                                                                                                                                                                                                                                    | -                                 |  |         |                     |                                   |             |          |                  |       |          |                  |                      |          |                  |                    |          |                  |                    |          |                  |                                    |          |                  |                                      |          |   |                 |          |   |
| Quality of life       | CRITICAL                                                                                                                                                                                                                                                                                                                                                                  | -                                                                                                                                                                                                                                                                                                                                                                                                                                                                                                                                                                                                                                                                                                                                                                                                                                                                                           |                                   |  |         |                     |                                   |             |          |                  |       |          |                  |                      |          |                  |                    |          |                  |                    |          |                  |                                    |          |                  |                                      |          |   |                 |          |   |
| VALUES                | <p><b>Is there important uncertainty about or variability in how much people value the main outcomes?</b></p> <ul style="list-style-type: none"><li>○ Important uncertainty or variability</li><li>● Possibly important uncertainty or variability</li><li>○ Probably no important uncertainty or variability</li><li>○ No important uncertainty or variability</li></ul> | <p>Values and preferences:</p> <p>Three relevant studies were identified that provide data on patient values and preferences:</p> <p>Mehta and Marras, 2011 evaluated the impact of pulmonary NTM on health-related quality of life. In this study, patients with pulmonary NTM had significantly impaired health-related quality of life with two QOL measures significantly lower than historical normal controls. Multivariable analysis showed an association between QOL scores and lung function.</p> <p>Hong, et al, 2014 also evaluated the impact of pulmonary NTM on health-related quality of life. This was a direct comparison between patients with NTM disease and healthy subjects and found patients with NTM reported more health status issues and anxiety/depression issues than healthy controls. Lung function was also independently associated with QOL scores.</p> |                                   |  |         |                     |                                   |             |          |                  |       |          |                  |                      |          |                  |                    |          |                  |                    |          |                  |                                    |          |                  |                                      |          |   |                 |          |   |

|                                                     |                                                                                                                                                                                                                                                                                                                                                 | Czaja, et al 2015 evaluated change in quality of life in response to various treatment regimens for <i>M. abscessus</i> (many patients had coinfection with MAC or Pseudomonas). Mean QOL score was significantly improved after treatment at 3, 6, 12, and 24 months.                                                                                                                                                                                                                                                                                                                                                                                                                                                                                                                                                                                                                                                                                                                                                                                                                                                                                                                                                                                                                                                                                                                                                                                                                                                                                                                                                |                                                                                    |                          |                              |                                 |  |  |          |                                        |  |                          |                              |                                 |                        |                     |             |              |                            |                        |                              |                                 |       |         |             |   |                            |                                 |                      |         |              |   |                            |                                 |                    |         |               |   |                            |                                 |                    |         |               |   |                            |                                 |                                    |         |             |   |                            |                                 |                                                     |         |         |   |   |   |                                                          |
|-----------------------------------------------------|-------------------------------------------------------------------------------------------------------------------------------------------------------------------------------------------------------------------------------------------------------------------------------------------------------------------------------------------------|-----------------------------------------------------------------------------------------------------------------------------------------------------------------------------------------------------------------------------------------------------------------------------------------------------------------------------------------------------------------------------------------------------------------------------------------------------------------------------------------------------------------------------------------------------------------------------------------------------------------------------------------------------------------------------------------------------------------------------------------------------------------------------------------------------------------------------------------------------------------------------------------------------------------------------------------------------------------------------------------------------------------------------------------------------------------------------------------------------------------------------------------------------------------------------------------------------------------------------------------------------------------------------------------------------------------------------------------------------------------------------------------------------------------------------------------------------------------------------------------------------------------------------------------------------------------------------------------------------------------------|------------------------------------------------------------------------------------|--------------------------|------------------------------|---------------------------------|--|--|----------|----------------------------------------|--|--------------------------|------------------------------|---------------------------------|------------------------|---------------------|-------------|--------------|----------------------------|------------------------|------------------------------|---------------------------------|-------|---------|-------------|---|----------------------------|---------------------------------|----------------------|---------|--------------|---|----------------------------|---------------------------------|--------------------|---------|---------------|---|----------------------------|---------------------------------|--------------------|---------|---------------|---|----------------------------|---------------------------------|------------------------------------|---------|-------------|---|----------------------------|---------------------------------|-----------------------------------------------------|---------|---------|---|---|---|----------------------------------------------------------|
| BALANCE OF EFFECTS                                  | <b>Does the balance between desirable and undesirable effects favor the intervention or the comparison?</b><br><br>○ Favors the comparison<br>○ Probably favors the comparison<br>○ Does not favor either the intervention or the comparison<br>● Probably favors the intervention<br>○ Favors the intervention<br><br>○ Varies<br>○ Don't know | <table><tr><th colspan="6">Macrolide compared to No macrolide for Mycobacterium abscessus pulmonary infection</th></tr><tr><th rowspan="2">Outcomes</th><th colspan="2">Anticipated absolute effects* (95% CI)</th><th rowspan="2">Relative effect (95% CI)</th><th rowspan="2">Nº of participants (studies)</th><th rowspan="2">Quality of the evidence (GRADE)</th></tr><tr><th>Risk with No macrolide</th><th>Risk with Macrolide</th></tr><tr><td>Cure of NTM</td><td>429 per 1000</td><td>934 per 1000 (420 to 1000)</td><td>RR 2.18 (0.98 to 4.84)</td><td>82 (2 observational studies)</td><td>⊕○○○<br/>VERY LOW<sup>1,2</sup></td></tr><tr><td>Death</td><td>no data</td><td>2/65 (3.1%)</td><td>-</td><td>65 (1 observational study)</td><td>⊕○○○<br/>VERY LOW<sup>2,3</sup></td></tr><tr><td>Recurrence (Relapse)</td><td>no data</td><td>9/47 (19.1%)</td><td>-</td><td>47 (1 observational study)</td><td>⊕○○○<br/>VERY LOW<sup>2,3</sup></td></tr><tr><td>Culture Conversion</td><td>no data</td><td>47/65 (72.3%)</td><td>-</td><td>65 (1 observational study)</td><td>⊕○○○<br/>VERY LOW<sup>2,3</sup></td></tr><tr><td>Any adverse effect</td><td>no data</td><td>14/65 (21.5%)</td><td>-</td><td>65 (1 observational study)</td><td>⊕○○○<br/>VERY LOW<sup>2,3</sup></td></tr><tr><td>Withdrawal owing to adverse effect</td><td>no data</td><td>6/65 (9.2%)</td><td>-</td><td>65 (1 observational study)</td><td>⊕○○○<br/>VERY LOW<sup>2,3</sup></td></tr><tr><td>Development of antibiotic resistance - not measured</td><td>no data</td><td>no data</td><td>-</td><td>-</td><td>-</td></tr></table> | Macrolide compared to No macrolide for Mycobacterium abscessus pulmonary infection |                          |                              |                                 |  |  | Outcomes | Anticipated absolute effects* (95% CI) |  | Relative effect (95% CI) | Nº of participants (studies) | Quality of the evidence (GRADE) | Risk with No macrolide | Risk with Macrolide | Cure of NTM | 429 per 1000 | 934 per 1000 (420 to 1000) | RR 2.18 (0.98 to 4.84) | 82 (2 observational studies) | ⊕○○○<br>VERY LOW <sup>1,2</sup> | Death | no data | 2/65 (3.1%) | - | 65 (1 observational study) | ⊕○○○<br>VERY LOW <sup>2,3</sup> | Recurrence (Relapse) | no data | 9/47 (19.1%) | - | 47 (1 observational study) | ⊕○○○<br>VERY LOW <sup>2,3</sup> | Culture Conversion | no data | 47/65 (72.3%) | - | 65 (1 observational study) | ⊕○○○<br>VERY LOW <sup>2,3</sup> | Any adverse effect | no data | 14/65 (21.5%) | - | 65 (1 observational study) | ⊕○○○<br>VERY LOW <sup>2,3</sup> | Withdrawal owing to adverse effect | no data | 6/65 (9.2%) | - | 65 (1 observational study) | ⊕○○○<br>VERY LOW <sup>2,3</sup> | Development of antibiotic resistance - not measured | no data | no data | - | - | - | Intervention is considered macrolide-containing regimens |
|                                                     | Macrolide compared to No macrolide for Mycobacterium abscessus pulmonary infection                                                                                                                                                                                                                                                              |                                                                                                                                                                                                                                                                                                                                                                                                                                                                                                                                                                                                                                                                                                                                                                                                                                                                                                                                                                                                                                                                                                                                                                                                                                                                                                                                                                                                                                                                                                                                                                                                                       |                                                                                    |                          |                              |                                 |  |  |          |                                        |  |                          |                              |                                 |                        |                     |             |              |                            |                        |                              |                                 |       |         |             |   |                            |                                 |                      |         |              |   |                            |                                 |                    |         |               |   |                            |                                 |                    |         |               |   |                            |                                 |                                    |         |             |   |                            |                                 |                                                     |         |         |   |   |   |                                                          |
|                                                     | Outcomes                                                                                                                                                                                                                                                                                                                                        | Anticipated absolute effects* (95% CI)                                                                                                                                                                                                                                                                                                                                                                                                                                                                                                                                                                                                                                                                                                                                                                                                                                                                                                                                                                                                                                                                                                                                                                                                                                                                                                                                                                                                                                                                                                                                                                                |                                                                                    | Relative effect (95% CI) | Nº of participants (studies) | Quality of the evidence (GRADE) |  |  |          |                                        |  |                          |                              |                                 |                        |                     |             |              |                            |                        |                              |                                 |       |         |             |   |                            |                                 |                      |         |              |   |                            |                                 |                    |         |               |   |                            |                                 |                    |         |               |   |                            |                                 |                                    |         |             |   |                            |                                 |                                                     |         |         |   |   |   |                                                          |
|                                                     |                                                                                                                                                                                                                                                                                                                                                 | Risk with No macrolide                                                                                                                                                                                                                                                                                                                                                                                                                                                                                                                                                                                                                                                                                                                                                                                                                                                                                                                                                                                                                                                                                                                                                                                                                                                                                                                                                                                                                                                                                                                                                                                                | Risk with Macrolide                                                                |                          |                              |                                 |  |  |          |                                        |  |                          |                              |                                 |                        |                     |             |              |                            |                        |                              |                                 |       |         |             |   |                            |                                 |                      |         |              |   |                            |                                 |                    |         |               |   |                            |                                 |                    |         |               |   |                            |                                 |                                    |         |             |   |                            |                                 |                                                     |         |         |   |   |   |                                                          |
|                                                     | Cure of NTM                                                                                                                                                                                                                                                                                                                                     | 429 per 1000                                                                                                                                                                                                                                                                                                                                                                                                                                                                                                                                                                                                                                                                                                                                                                                                                                                                                                                                                                                                                                                                                                                                                                                                                                                                                                                                                                                                                                                                                                                                                                                                          | 934 per 1000 (420 to 1000)                                                         | RR 2.18 (0.98 to 4.84)   | 82 (2 observational studies) | ⊕○○○<br>VERY LOW <sup>1,2</sup> |  |  |          |                                        |  |                          |                              |                                 |                        |                     |             |              |                            |                        |                              |                                 |       |         |             |   |                            |                                 |                      |         |              |   |                            |                                 |                    |         |               |   |                            |                                 |                    |         |               |   |                            |                                 |                                    |         |             |   |                            |                                 |                                                     |         |         |   |   |   |                                                          |
|                                                     | Death                                                                                                                                                                                                                                                                                                                                           | no data                                                                                                                                                                                                                                                                                                                                                                                                                                                                                                                                                                                                                                                                                                                                                                                                                                                                                                                                                                                                                                                                                                                                                                                                                                                                                                                                                                                                                                                                                                                                                                                                               | 2/65 (3.1%)                                                                        | -                        | 65 (1 observational study)   | ⊕○○○<br>VERY LOW <sup>2,3</sup> |  |  |          |                                        |  |                          |                              |                                 |                        |                     |             |              |                            |                        |                              |                                 |       |         |             |   |                            |                                 |                      |         |              |   |                            |                                 |                    |         |               |   |                            |                                 |                    |         |               |   |                            |                                 |                                    |         |             |   |                            |                                 |                                                     |         |         |   |   |   |                                                          |
|                                                     | Recurrence (Relapse)                                                                                                                                                                                                                                                                                                                            | no data                                                                                                                                                                                                                                                                                                                                                                                                                                                                                                                                                                                                                                                                                                                                                                                                                                                                                                                                                                                                                                                                                                                                                                                                                                                                                                                                                                                                                                                                                                                                                                                                               | 9/47 (19.1%)                                                                       | -                        | 47 (1 observational study)   | ⊕○○○<br>VERY LOW <sup>2,3</sup> |  |  |          |                                        |  |                          |                              |                                 |                        |                     |             |              |                            |                        |                              |                                 |       |         |             |   |                            |                                 |                      |         |              |   |                            |                                 |                    |         |               |   |                            |                                 |                    |         |               |   |                            |                                 |                                    |         |             |   |                            |                                 |                                                     |         |         |   |   |   |                                                          |
|                                                     | Culture Conversion                                                                                                                                                                                                                                                                                                                              | no data                                                                                                                                                                                                                                                                                                                                                                                                                                                                                                                                                                                                                                                                                                                                                                                                                                                                                                                                                                                                                                                                                                                                                                                                                                                                                                                                                                                                                                                                                                                                                                                                               | 47/65 (72.3%)                                                                      | -                        | 65 (1 observational study)   | ⊕○○○<br>VERY LOW <sup>2,3</sup> |  |  |          |                                        |  |                          |                              |                                 |                        |                     |             |              |                            |                        |                              |                                 |       |         |             |   |                            |                                 |                      |         |              |   |                            |                                 |                    |         |               |   |                            |                                 |                    |         |               |   |                            |                                 |                                    |         |             |   |                            |                                 |                                                     |         |         |   |   |   |                                                          |
|                                                     | Any adverse effect                                                                                                                                                                                                                                                                                                                              | no data                                                                                                                                                                                                                                                                                                                                                                                                                                                                                                                                                                                                                                                                                                                                                                                                                                                                                                                                                                                                                                                                                                                                                                                                                                                                                                                                                                                                                                                                                                                                                                                                               | 14/65 (21.5%)                                                                      | -                        | 65 (1 observational study)   | ⊕○○○<br>VERY LOW <sup>2,3</sup> |  |  |          |                                        |  |                          |                              |                                 |                        |                     |             |              |                            |                        |                              |                                 |       |         |             |   |                            |                                 |                      |         |              |   |                            |                                 |                    |         |               |   |                            |                                 |                    |         |               |   |                            |                                 |                                    |         |             |   |                            |                                 |                                                     |         |         |   |   |   |                                                          |
|                                                     | Withdrawal owing to adverse effect                                                                                                                                                                                                                                                                                                              | no data                                                                                                                                                                                                                                                                                                                                                                                                                                                                                                                                                                                                                                                                                                                                                                                                                                                                                                                                                                                                                                                                                                                                                                                                                                                                                                                                                                                                                                                                                                                                                                                                               | 6/65 (9.2%)                                                                        | -                        | 65 (1 observational study)   | ⊕○○○<br>VERY LOW <sup>2,3</sup> |  |  |          |                                        |  |                          |                              |                                 |                        |                     |             |              |                            |                        |                              |                                 |       |         |             |   |                            |                                 |                      |         |              |   |                            |                                 |                    |         |               |   |                            |                                 |                    |         |               |   |                            |                                 |                                    |         |             |   |                            |                                 |                                                     |         |         |   |   |   |                                                          |
| Development of antibiotic resistance - not measured | no data                                                                                                                                                                                                                                                                                                                                         | no data                                                                                                                                                                                                                                                                                                                                                                                                                                                                                                                                                                                                                                                                                                                                                                                                                                                                                                                                                                                                                                                                                                                                                                                                                                                                                                                                                                                                                                                                                                                                                                                                               | -                                                                                  | -                        | -                            |                                 |  |  |          |                                        |  |                          |                              |                                 |                        |                     |             |              |                            |                        |                              |                                 |       |         |             |   |                            |                                 |                      |         |              |   |                            |                                 |                    |         |               |   |                            |                                 |                    |         |               |   |                            |                                 |                                    |         |             |   |                            |                                 |                                                     |         |         |   |   |   |                                                          |

|                    |                                                                                                                                                                                                                                                                                                                                                                                                                          |                                                                                                                                     |  |
|--------------------|--------------------------------------------------------------------------------------------------------------------------------------------------------------------------------------------------------------------------------------------------------------------------------------------------------------------------------------------------------------------------------------------------------------------------|-------------------------------------------------------------------------------------------------------------------------------------|--|
|                    |                                                                                                                                                                                                                                                                                                                                                                                                                          | <div> <div>Quality of life - not measured</div> <div>no data</div> <div>no data</div> <div>-</div> <div>-</div> <div>-</div> </div> |  |
| RESOURCES REQUIRED | <b>How large are the resource requirements (costs)?</b> <ul style="list-style-type: none"> <li>○ Large costs</li> <li>○ Moderate costs</li> <li>● Negligible costs and savings</li> <li>○ Moderate savings</li> <li>○ Large savings</li> <li>○ Varies</li> <li>○ Don't know</li> </ul>                                                                                                                                   | No research evidence was identified.                                                                                                |  |
| COST EFFECTIVENESS | <b>Does the cost-effectiveness of the intervention favor the intervention or the comparison?</b> <ul style="list-style-type: none"> <li>○ Favors the comparison</li> <li>○ Probably favors the comparison</li> <li>○ Does not favor either the intervention or the comparison</li> <li>○ Probably favors the intervention</li> <li>○ Favors the intervention</li> <li>● Varies</li> <li>○ No included studies</li> </ul> | No research evidence was identified.                                                                                                |  |
| EQUITY             | <b>What would be the impact on health equity?</b> <ul style="list-style-type: none"> <li>○ Reduced</li> <li>○ Probably reduced</li> <li>● Probably no impact</li> <li>○ Probably increased</li> <li>○ Increased</li> </ul>                                                                                                                                                                                               | No research evidence was identified.                                                                                                |  |

|               |                                                                                                                                                                                                                                |                                                                                                                                                                                                                                                                                                                                                                      |  |
|---------------|--------------------------------------------------------------------------------------------------------------------------------------------------------------------------------------------------------------------------------|----------------------------------------------------------------------------------------------------------------------------------------------------------------------------------------------------------------------------------------------------------------------------------------------------------------------------------------------------------------------|--|
|               | <ul style="list-style-type: none"> <li>○ Varies</li> <li>○ Don't know</li> </ul>                                                                                                                                               |                                                                                                                                                                                                                                                                                                                                                                      |  |
| ACCEPTABILITY | <p><b>Is the intervention acceptable to key stakeholders?</b></p> <ul style="list-style-type: none"> <li>○ No</li> <li>○ Probably no</li> <li>● Probably yes</li> <li>○ Yes</li> <li>○ Varies</li> <li>○ Don't know</li> </ul> | No research evidence was identified.                                                                                                                                                                                                                                                                                                                                 |  |
| FEASIBILITY   | <p><b>Is the intervention feasible to implement?</b></p> <ul style="list-style-type: none"> <li>○ No</li> <li>○ Probably no</li> <li>● Probably yes</li> <li>○ Yes</li> <li>○ Varies</li> <li>○ Don't know</li> </ul>          | A study by Adjemian, et al in 2014 evaluated treatment of M abscessus and MAC, looking at compliance with the 2007 ATS/IDSA guidelines. This study found poor adherence with only 13% of antibiotic regimens compliant with guidelines. Of prescribed regimens for MAC, only 44% contained a macrolide, while 36% of regimens for M abscessus contained a macrolide. |  |

## Summary of judgments

|                     | JUDGEMENT |          |          |         |  |        |            | IMPLICATIONS |
|---------------------|-----------|----------|----------|---------|--|--------|------------|--------------|
| DESIRABLE EFFECTS   | Trivial   | Small    | Moderate | Large   |  | Varies | Don't know |              |
| UNDESIRABLE EFFECTS | Large     | Moderate | Small    | Trivial |  | Varies | Don't know |              |

|                              | JUDGEMENT                            |                                                      |                                                          |                                         |                         |               |                     | IMPLICATIONS |
|------------------------------|--------------------------------------|------------------------------------------------------|----------------------------------------------------------|-----------------------------------------|-------------------------|---------------|---------------------|--------------|
| <b>CERTAINTY OF EVIDENCE</b> | <b>Very low</b>                      | Low                                                  | Moderate                                                 | High                                    |                         |               | No included studies |              |
| <b>VALUES</b>                | Important uncertainty or variability | <b>Possibly important uncertainty or variability</b> | Probably no important uncertainty or variability         | No important uncertainty or variability |                         |               |                     |              |
| <b>BALANCE OF EFFECTS</b>    | Favors the comparison                | Probably favors the comparison                       | Does not favor either the intervention or the comparison | <b>Probably favors the intervention</b> | Favors the intervention | Varies        | Don't know          |              |
| <b>RESOURCES REQUIRED</b>    | Large costs                          | Moderate costs                                       | <b>Negligible costs and savings</b>                      | Moderate savings                        | Large savings           | Varies        | Don't know          |              |
| <b>COST EFFECTIVENESS</b>    | Favors the comparison                | Probably favors the comparison                       | Does not favor either the intervention or the comparison | Probably favors the intervention        | Favors the intervention | <b>Varies</b> | No included studies |              |
| <b>EQUITY</b>                | Reduced                              | Probably reduced                                     | <b>Probably no impact</b>                                | Probably increased                      | Increased               | Varies        | Don't know          |              |
| <b>ACCEPTABILITY</b>         | No                                   | Probably no                                          | <b>Probably yes</b>                                      | Yes                                     |                         | Varies        | Don't know          |              |
| <b>FEASIBILITY</b>           | No                                   | Probably no                                          | <b>Probably yes</b>                                      | Yes                                     |                         | Varies        | Don't know          |              |



## Conclusions

**In patients with *M. abscessus* pulmonary disease, should a macrolide-based regimen or a regimen without a macrolide be used for treatment?**

| TYPE OF RECOMMENDATION               | Strong recommendation against the intervention                                                                                                                                                                                                                                                                                                                                                                                                                                                                                                                                                                                                                                                                                                                                                                                                                                                                        | Conditional recommendation against the intervention | Conditional recommendation for either the intervention or the comparison | Conditional recommendation for the intervention | Strong recommendation for the intervention |
|--------------------------------------|-----------------------------------------------------------------------------------------------------------------------------------------------------------------------------------------------------------------------------------------------------------------------------------------------------------------------------------------------------------------------------------------------------------------------------------------------------------------------------------------------------------------------------------------------------------------------------------------------------------------------------------------------------------------------------------------------------------------------------------------------------------------------------------------------------------------------------------------------------------------------------------------------------------------------|-----------------------------------------------------|--------------------------------------------------------------------------|-------------------------------------------------|--------------------------------------------|
|                                      | ○                                                                                                                                                                                                                                                                                                                                                                                                                                                                                                                                                                                                                                                                                                                                                                                                                                                                                                                     | ○                                                   | ○                                                                        | ○                                               | ●                                          |
| <b>RECOMMENDATION</b>                | <p>In patients with <i>M. abscessus</i> pulmonary disease caused by strains <u>without</u> inducible or mutational resistance, we recommend a macrolide-containing multidrug treatment regimen. (strong recommendation, very low confidence in estimates of effect). (16 Strong, 0 Conditional, 2 Abstain).</p> <p>The expert panel voted for a strong recommendation for the intervention.</p> <p>In patients with <i>M. abscessus</i> pulmonary disease caused by strains <u>with</u> inducible or mutational macrolide resistance, we suggest a macrolide-containing regimen if the drug is being used for its immunomodulatory properties; however, the macrolide should not be counted as an active drug in the multidrug regimen (conditional recommendation, very low confidence in estimates of effect).</p> <p>The expert panel voted unanimously for a conditional recommendation for the intervention.</p> |                                                     |                                                                          |                                                 |                                            |
| <b>JUSTIFICATION</b>                 | <p>Macrolides are very active <i>in vitro</i> against <i>M. abscessus</i>.</p> <p>Indirect evidence supports use of macrolides in macrolide-susceptible cases.</p> <p><i>M. abscessus</i> can be life threatening and the use of macrolides is potentially of great benefit.</p>                                                                                                                                                                                                                                                                                                                                                                                                                                                                                                                                                                                                                                      |                                                     |                                                                          |                                                 |                                            |
| <b>SUBGROUP CONSIDERATIONS</b>       | Disease caused by strains with and without inducible macrolide resistance should be treated differently.                                                                                                                                                                                                                                                                                                                                                                                                                                                                                                                                                                                                                                                                                                                                                                                                              |                                                     |                                                                          |                                                 |                                            |
| <b>IMPLEMENTATION CONSIDERATIONS</b> |                                                                                                                                                                                                                                                                                                                                                                                                                                                                                                                                                                                                                                                                                                                                                                                                                                                                                                                       |                                                     |                                                                          |                                                 |                                            |

|                                  |                                                                                                                                                                                                                      |
|----------------------------------|----------------------------------------------------------------------------------------------------------------------------------------------------------------------------------------------------------------------|
| <b>MONITORING AND EVALUATION</b> | Audiograms, EKG                                                                                                                                                                                                      |
| <b>RESEARCH PRIORITIES</b>       | Need to provide precise speciation in future trials and perform randomized trial including macrolide vs no macrolide in <i>M. abscessus</i> subspecies with macrolide resistance (inducible and acquired subgroups). |

# Table E4.20. Question XX

|                                                                                                                            |                                                                                                                                                  |
|----------------------------------------------------------------------------------------------------------------------------|--------------------------------------------------------------------------------------------------------------------------------------------------|
| In patients with <i>M. abscessus</i> pulmonary disease, how many antibiotics should be included within multidrug regimens? |                                                                                                                                                  |
| POPULATION:                                                                                                                | treatment of Mycobacterium abscessus pulmonary infection                                                                                         |
| INTERVENTION:                                                                                                              | two drugs                                                                                                                                        |
| COMPARISON:                                                                                                                | three vs. four drugs                                                                                                                             |
| MAIN OUTCOMES:                                                                                                             | Cure of NTM disease; Recurrence (relapse); Any adverse effect; Culture conversion; Quality of Life; Development of antibiotic resistance; Death; |

## Assessment

|                   | JUDGEMENT                                                                                                                                                                                                                                               | RESEARCH EVIDENCE                                                                                              |                                           |                 |                    |                | ADDITIONAL CONSIDERATIONS                                                                                                                                                                                                        |
|-------------------|---------------------------------------------------------------------------------------------------------------------------------------------------------------------------------------------------------------------------------------------------------|----------------------------------------------------------------------------------------------------------------|-------------------------------------------|-----------------|--------------------|----------------|----------------------------------------------------------------------------------------------------------------------------------------------------------------------------------------------------------------------------------|
| DESIRABLE EFFECTS | <b>How substantial are the desirable anticipated effects?</b> <ul style="list-style-type: none"><li>● Trivial<ul style="list-style-type: none"><li>○ Small</li><li>○ Moderate</li><li>○ Large</li></ul></li><li>○ Varies</li><li>○ Don't know</li></ul> | <hr/> <b>Two drugs compared to three vs. four drugs for <i>Mycobacterium abscessus</i> pulmonary infection</b> |                                           |                 |                    |                | It is not possible to determine the outcomes for treatment of <i>M. abscessus</i> subspecies <i>abscessus</i> as the isolates were not speciated and not randomly distributed amongst the patients in this observational cohort. |
|                   |                                                                                                                                                                                                                                                         | Outcomes                                                                                                       | Anticipated absolute effects*<br>(95% CI) | Relative effect | Nº of participants | Quality of the |                                                                                                                                                                                                                                  |
|                   |                                                                                                                                                                                                                                                         |                                                                                                                |                                           |                 |                    |                |                                                                                                                                                                                                                                  |

**How substantial are the undesirable anticipated effects?**

- Large
- Moderate
- Small
- Trivial
  
- Varies
- Don't know

|                                                           |   | Risk with three<br>vs. four drugs                                                                                                           | Risk with two<br>drugs               | (95% CI)                          | (studies)                           | evidence<br>(GRADE)       |
|-----------------------------------------------------------|---|---------------------------------------------------------------------------------------------------------------------------------------------|--------------------------------------|-----------------------------------|-------------------------------------|---------------------------|
| Cure of NTM disease<br>follow up: median<br>445 days      |   | 833 per 1000                                                                                                                                | <b>767 per 1000</b><br>(558 to 1000) | <b>RR 0.92</b><br>(0.67 to 1.26)  | 41<br>(1<br>observational<br>study) | ⊕○○○<br>VERY LOW<br>1,2   |
| Recurrence<br>(relapse)<br>follow up: median<br>445 days  |   | 50 per 1000                                                                                                                                 | <b>231 per 1000</b><br>(27 to 1000)  | <b>RR 4.62</b><br>(0.54 to 39.73) | 33<br>(1<br>observational<br>study) | ⊕○○○<br>VERY LOW<br>1,2,3 |
| Any adverse effect<br>follow up: median<br>445 days       |   | 625 per 1000                                                                                                                                | <b>175 per 1000</b><br>(63 to 519)   | <b>RR 0.28</b><br>(0.10 to 0.83)  | 41<br>(1<br>observational<br>study) | ⊕○○○<br>VERY LOW<br>1,2,3 |
| Culture conversion                                        |   | The study reported no significant difference between the two groups, but only reported a p-value of 0.698 without specifying exact numbers. |                                      |                                   | (1<br>observational<br>study)       | ⊕○○○<br>VERY LOW<br>1,2,3 |
| Quality of Life - not<br>measured                         | - | -                                                                                                                                           | -                                    | -                                 | -                                   | -                         |
| Development of<br>antibiotic resistance<br>- not measured | - | -                                                                                                                                           | -                                    | -                                 | -                                   | -                         |
| Death - not<br>reported                                   | - | -                                                                                                                                           | -                                    | -                                 | -                                   | -                         |

| CERTAINTY OF EVIDENCE                | <p><b>What is the overall certainty of the evidence of effects?</b></p> <ul style="list-style-type: none"><li>● Very low</li><li>○ Low</li><li>○ Moderate</li><li>○ High</li><li>○ No included studies</li></ul>                                                                                                                                                          | <p><b>The relative importance or values of the main outcomes of interest:</b></p> <table><tr><th>Outcome</th><th>Relative importance</th><th>Certainty of the evidence (GRADE)</th></tr><tr><td>Cure of NTM disease</td><td>CRITICAL</td><td>⊕○○○<br/>VERY LOW</td></tr><tr><td>Recurrence (relapse)</td><td>CRITICAL</td><td>⊕○○○<br/>VERY LOW</td></tr><tr><td>Any adverse effect</td><td>CRITICAL</td><td>⊕○○○<br/>VERY LOW</td></tr><tr><td>Culture conversion</td><td>CRITICAL</td><td>⊕○○○<br/>VERY LOW</td></tr><tr><td>Quality of Life</td><td>CRITICAL</td><td></td></tr><tr><td>Development of antibiotic resistance</td><td>CRITICAL</td><td></td></tr><tr><td>Death</td><td>CRITICAL</td><td></td></tr><tr><td></td><td></td><td></td></tr></table> | Outcome | Relative importance | Certainty of the evidence (GRADE) | Cure of NTM disease | CRITICAL | ⊕○○○<br>VERY LOW | Recurrence (relapse) | CRITICAL | ⊕○○○<br>VERY LOW | Any adverse effect | CRITICAL | ⊕○○○<br>VERY LOW | Culture conversion | CRITICAL | ⊕○○○<br>VERY LOW | Quality of Life | CRITICAL |  | Development of antibiotic resistance | CRITICAL |  | Death | CRITICAL |  |  |  |  |  |
|--------------------------------------|---------------------------------------------------------------------------------------------------------------------------------------------------------------------------------------------------------------------------------------------------------------------------------------------------------------------------------------------------------------------------|-----------------------------------------------------------------------------------------------------------------------------------------------------------------------------------------------------------------------------------------------------------------------------------------------------------------------------------------------------------------------------------------------------------------------------------------------------------------------------------------------------------------------------------------------------------------------------------------------------------------------------------------------------------------------------------------------------------------------------------------------------------------|---------|---------------------|-----------------------------------|---------------------|----------|------------------|----------------------|----------|------------------|--------------------|----------|------------------|--------------------|----------|------------------|-----------------|----------|--|--------------------------------------|----------|--|-------|----------|--|--|--|--|--|
| Outcome                              | Relative importance                                                                                                                                                                                                                                                                                                                                                       | Certainty of the evidence (GRADE)                                                                                                                                                                                                                                                                                                                                                                                                                                                                                                                                                                                                                                                                                                                               |         |                     |                                   |                     |          |                  |                      |          |                  |                    |          |                  |                    |          |                  |                 |          |  |                                      |          |  |       |          |  |  |  |  |  |
| Cure of NTM disease                  | CRITICAL                                                                                                                                                                                                                                                                                                                                                                  | ⊕○○○<br>VERY LOW                                                                                                                                                                                                                                                                                                                                                                                                                                                                                                                                                                                                                                                                                                                                                |         |                     |                                   |                     |          |                  |                      |          |                  |                    |          |                  |                    |          |                  |                 |          |  |                                      |          |  |       |          |  |  |  |  |  |
| Recurrence (relapse)                 | CRITICAL                                                                                                                                                                                                                                                                                                                                                                  | ⊕○○○<br>VERY LOW                                                                                                                                                                                                                                                                                                                                                                                                                                                                                                                                                                                                                                                                                                                                                |         |                     |                                   |                     |          |                  |                      |          |                  |                    |          |                  |                    |          |                  |                 |          |  |                                      |          |  |       |          |  |  |  |  |  |
| Any adverse effect                   | CRITICAL                                                                                                                                                                                                                                                                                                                                                                  | ⊕○○○<br>VERY LOW                                                                                                                                                                                                                                                                                                                                                                                                                                                                                                                                                                                                                                                                                                                                                |         |                     |                                   |                     |          |                  |                      |          |                  |                    |          |                  |                    |          |                  |                 |          |  |                                      |          |  |       |          |  |  |  |  |  |
| Culture conversion                   | CRITICAL                                                                                                                                                                                                                                                                                                                                                                  | ⊕○○○<br>VERY LOW                                                                                                                                                                                                                                                                                                                                                                                                                                                                                                                                                                                                                                                                                                                                                |         |                     |                                   |                     |          |                  |                      |          |                  |                    |          |                  |                    |          |                  |                 |          |  |                                      |          |  |       |          |  |  |  |  |  |
| Quality of Life                      | CRITICAL                                                                                                                                                                                                                                                                                                                                                                  |                                                                                                                                                                                                                                                                                                                                                                                                                                                                                                                                                                                                                                                                                                                                                                 |         |                     |                                   |                     |          |                  |                      |          |                  |                    |          |                  |                    |          |                  |                 |          |  |                                      |          |  |       |          |  |  |  |  |  |
| Development of antibiotic resistance | CRITICAL                                                                                                                                                                                                                                                                                                                                                                  |                                                                                                                                                                                                                                                                                                                                                                                                                                                                                                                                                                                                                                                                                                                                                                 |         |                     |                                   |                     |          |                  |                      |          |                  |                    |          |                  |                    |          |                  |                 |          |  |                                      |          |  |       |          |  |  |  |  |  |
| Death                                | CRITICAL                                                                                                                                                                                                                                                                                                                                                                  |                                                                                                                                                                                                                                                                                                                                                                                                                                                                                                                                                                                                                                                                                                                                                                 |         |                     |                                   |                     |          |                  |                      |          |                  |                    |          |                  |                    |          |                  |                 |          |  |                                      |          |  |       |          |  |  |  |  |  |
|                                      |                                                                                                                                                                                                                                                                                                                                                                           |                                                                                                                                                                                                                                                                                                                                                                                                                                                                                                                                                                                                                                                                                                                                                                 |         |                     |                                   |                     |          |                  |                      |          |                  |                    |          |                  |                    |          |                  |                 |          |  |                                      |          |  |       |          |  |  |  |  |  |
| VALUES                               | <p><b>Is there important uncertainty about or variability in how much people value the main outcomes?</b></p> <ul style="list-style-type: none"><li>○ Important uncertainty or variability</li><li>● Possibly important uncertainty or variability</li><li>○ Probably no important uncertainty or variability</li><li>○ No important uncertainty or variability</li></ul> | <p>Czaja, et al 2015 evaluated change in quality of life in response to various treatment regimens for M abscessus (many patients had coinfection with MAC or Pseudomonas). Mean QOL score was significantly improved after treatment at 3, 6, 12, and 24 months.</p>                                                                                                                                                                                                                                                                                                                                                                                                                                                                                           |         |                     |                                   |                     |          |                  |                      |          |                  |                    |          |                  |                    |          |                  |                 |          |  |                                      |          |  |       |          |  |  |  |  |  |

**Does the balance between desirable and undesirable effects favor the intervention or the comparison?**

- Favors the comparison
- Probably favors the comparison
- Does not favor either the intervention or the comparison
- Probably favors the intervention
- Favors the intervention
  
- Varies
- Don't know

**Two drugs compared to three vs. four drugs for Mycobacterium abscessus pulmonary infection**

| Outcomes                                        | Anticipated absolute effects*<br>(95% CI)                                                                                                   |                                      | Relative effect<br>(95% CI)       | Nº of participants<br>(studies) | Quality of the evidence<br>(GRADE) |
|-------------------------------------------------|---------------------------------------------------------------------------------------------------------------------------------------------|--------------------------------------|-----------------------------------|---------------------------------|------------------------------------|
|                                                 | Risk with three vs. four drugs                                                                                                              | Risk with two drugs                  |                                   |                                 |                                    |
| Cure of NTM disease follow up: median 445 days  | 833 per 1000                                                                                                                                | <b>767 per 1000</b><br>(558 to 1000) | <b>RR 0.92</b><br>(0.67 to 1.26)  | 41<br>(1 observational study)   | ⊕○○○<br>VERY LOW<br>1,2            |
| Recurrence (relapse) follow up: median 445 days | 50 per 1000                                                                                                                                 | <b>231 per 1000</b><br>(27 to 1000)  | <b>RR 4.62</b><br>(0.54 to 39.73) | 33<br>(1 observational study)   | ⊕○○○<br>VERY LOW<br>1,2,3          |
| Any adverse effect follow up: median 445 days   | 625 per 1000                                                                                                                                | <b>175 per 1000</b><br>(63 to 519)   | <b>RR 0.28</b><br>(0.10 to 0.83)  | 41<br>(1 observational study)   | ⊕○○○<br>VERY LOW<br>1,2,3          |
| Culture conversion                              | The study reported no significant difference between the two groups, but only reported a p-value of 0.698 without specifying exact numbers. |                                      |                                   | (1 observational study)         | ⊕○○○<br>VERY LOW<br>1,2,3          |
| Quality of Life - not measured                  | -                                                                                                                                           | -                                    | -                                 | -                               | -                                  |

|                                                     |                                                                                                                                                                                                                                                                                                                                                                                                                                                                |                                                                                                                                                                                                                                                              |                                                         |   |   |   |   |   |                      |   |   |   |   |   |  |  |  |  |  |  |  |
|-----------------------------------------------------|----------------------------------------------------------------------------------------------------------------------------------------------------------------------------------------------------------------------------------------------------------------------------------------------------------------------------------------------------------------------------------------------------------------------------------------------------------------|--------------------------------------------------------------------------------------------------------------------------------------------------------------------------------------------------------------------------------------------------------------|---------------------------------------------------------|---|---|---|---|---|----------------------|---|---|---|---|---|--|--|--|--|--|--|--|
|                                                     |                                                                                                                                                                                                                                                                                                                                                                                                                                                                | <table><tr><td>Development of antibiotic resistance - not measured</td><td>-</td><td>-</td><td>-</td><td>-</td><td>-</td></tr><tr><td>Death - not reported</td><td>-</td><td>-</td><td>-</td><td>-</td><td>-</td></tr><tr><td colspan="6"></td></tr></table> | Development of antibiotic resistance - not measured     | - | - | - | - | - | Death - not reported | - | - | - | - | - |  |  |  |  |  |  |  |
| Development of antibiotic resistance - not measured | -                                                                                                                                                                                                                                                                                                                                                                                                                                                              | -                                                                                                                                                                                                                                                            | -                                                       | - | - |   |   |   |                      |   |   |   |   |   |  |  |  |  |  |  |  |
| Death - not reported                                | -                                                                                                                                                                                                                                                                                                                                                                                                                                                              | -                                                                                                                                                                                                                                                            | -                                                       | - | - |   |   |   |                      |   |   |   |   |   |  |  |  |  |  |  |  |
|                                                     |                                                                                                                                                                                                                                                                                                                                                                                                                                                                |                                                                                                                                                                                                                                                              |                                                         |   |   |   |   |   |                      |   |   |   |   |   |  |  |  |  |  |  |  |
| RESOURCES REQUIRED                                  | <p><b>How large are the resource requirements (costs)?</b></p> <ul style="list-style-type: none"><li>○ Large costs</li><li>○ Moderate costs</li><li>○ Negligible costs and savings</li><li>○ Moderate savings</li><li>○ Large savings</li></ul> <p>● Varies</p> <ul style="list-style-type: none"><li>○ Don't know</li></ul>                                                                                                                                   | No research data available.                                                                                                                                                                                                                                  |                                                         |   |   |   |   |   |                      |   |   |   |   |   |  |  |  |  |  |  |  |
| COST EFFECTIVENESS                                  | <p><b>Does the cost-effectiveness of the intervention favor the intervention or the comparison?</b></p> <ul style="list-style-type: none"><li>○ Favors the comparison</li><li>○ Probably favors the comparison</li><li>○ Does not favor either the intervention or the comparison</li><li>○ Probably favors the intervention</li><li>○ Favors the intervention</li></ul> <p>● Varies</p> <ul style="list-style-type: none"><li>○ No included studies</li></ul> | Comparison is considered three drugs in this case.                                                                                                                                                                                                           |                                                         |   |   |   |   |   |                      |   |   |   |   |   |  |  |  |  |  |  |  |
| EQUITY                                              | <p><b>What would be the impact on health equity?</b></p> <ul style="list-style-type: none"><li>○ Reduced</li><li>○ Probably reduced</li><li>○ Probably no impact</li><li>○ Probably increased</li><li>○ Increased</li></ul>                                                                                                                                                                                                                                    | No research data available.                                                                                                                                                                                                                                  | This is dependent on the respective health care system. |   |   |   |   |   |                      |   |   |   |   |   |  |  |  |  |  |  |  |

|               |                                                                                                                                                                                                                         |                             |  |
|---------------|-------------------------------------------------------------------------------------------------------------------------------------------------------------------------------------------------------------------------|-----------------------------|--|
|               | <ul style="list-style-type: none"> <li>• Varies</li> <li>○ Don't know</li> </ul>                                                                                                                                        |                             |  |
| ACCEPTABILITY | <b>Is the intervention acceptable to key stakeholders?</b> <ul style="list-style-type: none"> <li>○ No</li> <li>• Probably no</li> <li>○ Probably yes</li> <li>○ Yes</li> <li>○ Varies</li> <li>○ Don't know</li> </ul> | No research data available. |  |
| FEASIBILITY   | <b>Is the intervention feasible to implement?</b> <ul style="list-style-type: none"> <li>○ No</li> <li>○ Probably no</li> <li>○ Probably yes</li> <li>○ Yes</li> <li>• Varies</li> <li>○ Don't know</li> </ul>          | No research data available. |  |

## Summary of judgments

|                     | JUDGEMENT |          |          |         |  |        |            | IMPLICATIONS |
|---------------------|-----------|----------|----------|---------|--|--------|------------|--------------|
| DESIRABLE EFFECTS   | Trivial   | Small    | Moderate | Large   |  | Varies | Don't know |              |
| UNDESIRABLE EFFECTS | Large     | Moderate | Small    | Trivial |  | Varies | Don't know |              |



|                              | JUDGEMENT                            |                                                      |                                                          |                                         |                         |               |                     | IMPLICATIONS |
|------------------------------|--------------------------------------|------------------------------------------------------|----------------------------------------------------------|-----------------------------------------|-------------------------|---------------|---------------------|--------------|
| <b>CERTAINTY OF EVIDENCE</b> | <b>Very low</b>                      | Low                                                  | Moderate                                                 | High                                    |                         |               | No included studies |              |
| <b>VALUES</b>                | Important uncertainty or variability | <b>Possibly important uncertainty or variability</b> | Probably no important uncertainty or variability         | No important uncertainty or variability |                         |               |                     |              |
| <b>BALANCE OF EFFECTS</b>    | Favors the comparison                | <b>Probably favors the comparison</b>                | Does not favor either the intervention or the comparison | Probably favors the intervention        | Favors the intervention | Varies        | Don't know          |              |
| <b>RESOURCES REQUIRED</b>    | Large costs                          | Moderate costs                                       | Negligible costs and savings                             | Moderate savings                        | Large savings           | <b>Varies</b> | Don't know          |              |
| <b>COST EFFECTIVENESS</b>    | Favors the comparison                | Probably favors the comparison                       | Does not favor either the intervention or the comparison | Probably favors the intervention        | Favors the intervention | <b>Varies</b> | No included studies |              |
| <b>EQUITY</b>                | Reduced                              | Probably reduced                                     | Probably no impact                                       | Probably increased                      | Increased               | <b>Varies</b> | Don't know          |              |
| <b>ACCEPTABILITY</b>         | No                                   | <b>Probably no</b>                                   | Probably yes                                             | Yes                                     |                         | Varies        | Don't know          |              |
| <b>FEASIBILITY</b>           | No                                   | Probably no                                          | Probably yes                                             | Yes                                     |                         | <b>Varies</b> | Don't know          |              |

## Conclusions

**In patients with *M. abscessus* pulmonary disease, how many antibiotics should be included within multidrug regimens?**

| TYPE OF RECOMMENDATION               | Strong recommendation against the intervention                                                                                                                                                                                                                                                                                                               | Conditional recommendation against the intervention | Conditional recommendation for either the intervention or the comparison | Conditional recommendation for the intervention | Strong recommendation for the intervention |
|--------------------------------------|--------------------------------------------------------------------------------------------------------------------------------------------------------------------------------------------------------------------------------------------------------------------------------------------------------------------------------------------------------------|-----------------------------------------------------|--------------------------------------------------------------------------|-------------------------------------------------|--------------------------------------------|
|                                      | ○                                                                                                                                                                                                                                                                                                                                                            | ○                                                   | ○                                                                        | ●                                               | ○                                          |
| <b>RECOMMENDATION</b>                | <p>In patients with <i>M. abscessus</i> pulmonary disease, we suggest a multidrug regimen that includes at least three active drugs (guided by <i>in vitro</i> susceptibility). (conditional recommendation, very low confidence in estimates of effect).</p> <p>The expert panel voted unanimously for a conditional recommendation for the comparison.</p> |                                                     |                                                                          |                                                 |                                            |
| <b>JUSTIFICATION</b>                 | <p>The severity of disease associated with <i>M. abscessus</i>, poor treatment outcomes, and high recurrence rates, warrants consideration of three or four drugs even if associated with a higher risk of adverse effects and higher cost.</p>                                                                                                              |                                                     |                                                                          |                                                 |                                            |
| <b>SUBGROUP CONSIDERATIONS</b>       | <p>The choice of drugs may be different in patients with extensive exposure to key antimycobacterial drugs (macrolides, aminoglycosides) in whom resistance may be a serious risk.</p>                                                                                                                                                                       |                                                     |                                                                          |                                                 |                                            |
| <b>IMPLEMENTATION CONSIDERATIONS</b> | <p>Barriers/facilitators for limitation include infrastructure and financial support for intravenous therapy and for expensive oral agents.</p>                                                                                                                                                                                                              |                                                     |                                                                          |                                                 |                                            |
| <b>MONITORING AND EVALUATION</b>     |                                                                                                                                                                                                                                                                                                                                                              |                                                     |                                                                          |                                                 |                                            |

**RESEARCH PRIORITIES**

There is a need for an RCT evaluating the optimal number of drugs (3 vs. 4 or more) with and without parenteral agents in treatment for *M. abscessus*, separated by subspecies.

# Table E4.21. Question XXI

|                                                                                                                          |                                                                                                                                            |
|--------------------------------------------------------------------------------------------------------------------------|--------------------------------------------------------------------------------------------------------------------------------------------|
| In patients with <i>M. abscessus</i> pulmonary disease, should shorter or longer duration therapy be used for treatment? |                                                                                                                                            |
| POPULATION:                                                                                                              | Mycobacterium abscessus pulmonary infection                                                                                                |
| INTERVENTION:                                                                                                            | shorter therapy duration                                                                                                                   |
| COMPARISON:                                                                                                              | longer therapy duration                                                                                                                    |
| MAIN OUTCOMES:                                                                                                           | Cure of NTM; Recurrence (relapse); Culture conversion; Quality of life; Development of antibiotic resistance; Death; Adverse drug effects; |

## Assessment

|                   | JUDGEMENT                                                                                                                                          | RESEARCH EVIDENCE                                                                                                   |                                           |                 |                    |                         | ADDITIONAL CONSIDERATIONS |
|-------------------|----------------------------------------------------------------------------------------------------------------------------------------------------|---------------------------------------------------------------------------------------------------------------------|-------------------------------------------|-----------------|--------------------|-------------------------|---------------------------|
| DESIRABLE EFFECTS | <b>How substantial are the desirable anticipated effects?</b><br><br>○ Trivial<br>○ Small<br>○ Moderate<br>○ Large<br><br>○ Varies<br>● Don't know |                                                                                                                     |                                           |                 |                    |                         |                           |
|                   |                                                                                                                                                    | <b>Shorter therapy duration compared to longer therapy duration for Mycobacterium abscessus pulmonary infection</b> |                                           |                 |                    |                         |                           |
|                   |                                                                                                                                                    | Outcomes                                                                                                            | Anticipated absolute effects*<br>(95% CI) | Relative effect | Nº of participants | Quality of the evidence |                           |

| UNDESIRABLE EFFECTS                                                                                                                              | <b>How substantial are the undesirable anticipated effects?</b><br><br>○ Large<br>○ Moderate<br>○ Small<br>○ Trivial<br><br>○ Varies<br>● Don't know                                                                                                                                                                                                                                               | <table><tr><th></th><th>Risk with longer therapy duration</th><th>Risk with shorter therapy duration</th><th>(95% CI)</th><th>(studies)</th><th>(GRADE)</th></tr><tr><td>Cure of NTM</td><td>1000 per 1000</td><td><b>750 per 1000</b><br/>(470 to 1000)</td><td><b>RR 0.75</b><br/>(0.47 to 1.20)</td><td>17<br/>(1 observational study)</td><td>⊕○○○<br/>VERY LOW<br/>1,2,3</td></tr><tr><td>Recurrence (relapse) - not measured</td><td>-</td><td>-</td><td>-</td><td>-</td><td>-</td></tr><tr><td>Culture conversion - not reported</td><td>-</td><td>-</td><td>-</td><td>-</td><td>-</td></tr><tr><td>Quality of life - not measured</td><td>-</td><td>-</td><td>-</td><td>-</td><td>-</td></tr><tr><td>Development of antibiotic resistance - not measured</td><td>-</td><td>-</td><td>-</td><td>-</td><td>-</td></tr><tr><td>Death - not reported</td><td>-</td><td>-</td><td>-</td><td>-</td><td>-</td></tr><tr><td>Adverse drug effects - not reported</td><td>-</td><td>-</td><td>-</td><td>-</td><td>-</td></tr></table> |                                      | Risk with longer therapy duration | Risk with shorter therapy duration | (95% CI)                  | (studies)        | (GRADE)              | Cure of NTM | 1000 per 1000 | <b>750 per 1000</b><br>(470 to 1000) | <b>RR 0.75</b><br>(0.47 to 1.20) | 17<br>(1 observational study) | ⊕○○○<br>VERY LOW<br>1,2,3 | Recurrence (relapse) - not measured | - | - | - | - | - | Culture conversion - not reported | - | - | - | - | - | Quality of life - not measured | - | - | - | - | - | Development of antibiotic resistance - not measured | - | - | - | - | - | Death - not reported | - | - | - | - | - | Adverse drug effects - not reported | - | - | - | - | - |  |
|--------------------------------------------------------------------------------------------------------------------------------------------------|----------------------------------------------------------------------------------------------------------------------------------------------------------------------------------------------------------------------------------------------------------------------------------------------------------------------------------------------------------------------------------------------------|-------------------------------------------------------------------------------------------------------------------------------------------------------------------------------------------------------------------------------------------------------------------------------------------------------------------------------------------------------------------------------------------------------------------------------------------------------------------------------------------------------------------------------------------------------------------------------------------------------------------------------------------------------------------------------------------------------------------------------------------------------------------------------------------------------------------------------------------------------------------------------------------------------------------------------------------------------------------------------------------------------------------------------------|--------------------------------------|-----------------------------------|------------------------------------|---------------------------|------------------|----------------------|-------------|---------------|--------------------------------------|----------------------------------|-------------------------------|---------------------------|-------------------------------------|---|---|---|---|---|-----------------------------------|---|---|---|---|---|--------------------------------|---|---|---|---|---|-----------------------------------------------------|---|---|---|---|---|----------------------|---|---|---|---|---|-------------------------------------|---|---|---|---|---|--|
|                                                                                                                                                  |                                                                                                                                                                                                                                                                                                                                                                                                    | Risk with longer therapy duration                                                                                                                                                                                                                                                                                                                                                                                                                                                                                                                                                                                                                                                                                                                                                                                                                                                                                                                                                                                                   | Risk with shorter therapy duration   | (95% CI)                          | (studies)                          | (GRADE)                   |                  |                      |             |               |                                      |                                  |                               |                           |                                     |   |   |   |   |   |                                   |   |   |   |   |   |                                |   |   |   |   |   |                                                     |   |   |   |   |   |                      |   |   |   |   |   |                                     |   |   |   |   |   |  |
|                                                                                                                                                  | Cure of NTM                                                                                                                                                                                                                                                                                                                                                                                        | 1000 per 1000                                                                                                                                                                                                                                                                                                                                                                                                                                                                                                                                                                                                                                                                                                                                                                                                                                                                                                                                                                                                                       | <b>750 per 1000</b><br>(470 to 1000) | <b>RR 0.75</b><br>(0.47 to 1.20)  | 17<br>(1 observational study)      | ⊕○○○<br>VERY LOW<br>1,2,3 |                  |                      |             |               |                                      |                                  |                               |                           |                                     |   |   |   |   |   |                                   |   |   |   |   |   |                                |   |   |   |   |   |                                                     |   |   |   |   |   |                      |   |   |   |   |   |                                     |   |   |   |   |   |  |
|                                                                                                                                                  | Recurrence (relapse) - not measured                                                                                                                                                                                                                                                                                                                                                                | -                                                                                                                                                                                                                                                                                                                                                                                                                                                                                                                                                                                                                                                                                                                                                                                                                                                                                                                                                                                                                                   | -                                    | -                                 | -                                  | -                         |                  |                      |             |               |                                      |                                  |                               |                           |                                     |   |   |   |   |   |                                   |   |   |   |   |   |                                |   |   |   |   |   |                                                     |   |   |   |   |   |                      |   |   |   |   |   |                                     |   |   |   |   |   |  |
|                                                                                                                                                  | Culture conversion - not reported                                                                                                                                                                                                                                                                                                                                                                  | -                                                                                                                                                                                                                                                                                                                                                                                                                                                                                                                                                                                                                                                                                                                                                                                                                                                                                                                                                                                                                                   | -                                    | -                                 | -                                  | -                         |                  |                      |             |               |                                      |                                  |                               |                           |                                     |   |   |   |   |   |                                   |   |   |   |   |   |                                |   |   |   |   |   |                                                     |   |   |   |   |   |                      |   |   |   |   |   |                                     |   |   |   |   |   |  |
|                                                                                                                                                  | Quality of life - not measured                                                                                                                                                                                                                                                                                                                                                                     | -                                                                                                                                                                                                                                                                                                                                                                                                                                                                                                                                                                                                                                                                                                                                                                                                                                                                                                                                                                                                                                   | -                                    | -                                 | -                                  | -                         |                  |                      |             |               |                                      |                                  |                               |                           |                                     |   |   |   |   |   |                                   |   |   |   |   |   |                                |   |   |   |   |   |                                                     |   |   |   |   |   |                      |   |   |   |   |   |                                     |   |   |   |   |   |  |
|                                                                                                                                                  | Development of antibiotic resistance - not measured                                                                                                                                                                                                                                                                                                                                                | -                                                                                                                                                                                                                                                                                                                                                                                                                                                                                                                                                                                                                                                                                                                                                                                                                                                                                                                                                                                                                                   | -                                    | -                                 | -                                  | -                         |                  |                      |             |               |                                      |                                  |                               |                           |                                     |   |   |   |   |   |                                   |   |   |   |   |   |                                |   |   |   |   |   |                                                     |   |   |   |   |   |                      |   |   |   |   |   |                                     |   |   |   |   |   |  |
|                                                                                                                                                  | Death - not reported                                                                                                                                                                                                                                                                                                                                                                               | -                                                                                                                                                                                                                                                                                                                                                                                                                                                                                                                                                                                                                                                                                                                                                                                                                                                                                                                                                                                                                                   | -                                    | -                                 | -                                  | -                         |                  |                      |             |               |                                      |                                  |                               |                           |                                     |   |   |   |   |   |                                   |   |   |   |   |   |                                |   |   |   |   |   |                                                     |   |   |   |   |   |                      |   |   |   |   |   |                                     |   |   |   |   |   |  |
| Adverse drug effects - not reported                                                                                                              | -                                                                                                                                                                                                                                                                                                                                                                                                  | -                                                                                                                                                                                                                                                                                                                                                                                                                                                                                                                                                                                                                                                                                                                                                                                                                                                                                                                                                                                                                                   | -                                    | -                                 | -                                  |                           |                  |                      |             |               |                                      |                                  |                               |                           |                                     |   |   |   |   |   |                                   |   |   |   |   |   |                                |   |   |   |   |   |                                                     |   |   |   |   |   |                      |   |   |   |   |   |                                     |   |   |   |   |   |  |
| <b>What is the overall certainty of the evidence of effects?</b><br><br>● Very low<br>○ Low<br>○ Moderate<br>○ High<br><br>○ No included studies | <b>The relative importance or values of the main outcomes of interest:</b><br><table><tr><th>Outcome</th><th>Relative importance</th><th>Certainty of the evidence (GRADE)</th></tr><tr><td>Cure of NTM</td><td>CRITICAL</td><td>⊕○○○<br/>VERY LOW</td></tr><tr><td>Recurrence (relapse)</td><td>CRITICAL</td><td></td></tr><tr><td>Culture conversion</td><td>CRITICAL</td><td></td></tr></table> | Outcome                                                                                                                                                                                                                                                                                                                                                                                                                                                                                                                                                                                                                                                                                                                                                                                                                                                                                                                                                                                                                             | Relative importance                  | Certainty of the evidence (GRADE) | Cure of NTM                        | CRITICAL                  | ⊕○○○<br>VERY LOW | Recurrence (relapse) | CRITICAL    |               | Culture conversion                   | CRITICAL                         |                               |                           |                                     |   |   |   |   |   |                                   |   |   |   |   |   |                                |   |   |   |   |   |                                                     |   |   |   |   |   |                      |   |   |   |   |   |                                     |   |   |   |   |   |  |
| Outcome                                                                                                                                          | Relative importance                                                                                                                                                                                                                                                                                                                                                                                | Certainty of the evidence (GRADE)                                                                                                                                                                                                                                                                                                                                                                                                                                                                                                                                                                                                                                                                                                                                                                                                                                                                                                                                                                                                   |                                      |                                   |                                    |                           |                  |                      |             |               |                                      |                                  |                               |                           |                                     |   |   |   |   |   |                                   |   |   |   |   |   |                                |   |   |   |   |   |                                                     |   |   |   |   |   |                      |   |   |   |   |   |                                     |   |   |   |   |   |  |
| Cure of NTM                                                                                                                                      | CRITICAL                                                                                                                                                                                                                                                                                                                                                                                           | ⊕○○○<br>VERY LOW                                                                                                                                                                                                                                                                                                                                                                                                                                                                                                                                                                                                                                                                                                                                                                                                                                                                                                                                                                                                                    |                                      |                                   |                                    |                           |                  |                      |             |               |                                      |                                  |                               |                           |                                     |   |   |   |   |   |                                   |   |   |   |   |   |                                |   |   |   |   |   |                                                     |   |   |   |   |   |                      |   |   |   |   |   |                                     |   |   |   |   |   |  |
| Recurrence (relapse)                                                                                                                             | CRITICAL                                                                                                                                                                                                                                                                                                                                                                                           |                                                                                                                                                                                                                                                                                                                                                                                                                                                                                                                                                                                                                                                                                                                                                                                                                                                                                                                                                                                                                                     |                                      |                                   |                                    |                           |                  |                      |             |               |                                      |                                  |                               |                           |                                     |   |   |   |   |   |                                   |   |   |   |   |   |                                |   |   |   |   |   |                                                     |   |   |   |   |   |                      |   |   |   |   |   |                                     |   |   |   |   |   |  |
| Culture conversion                                                                                                                               | CRITICAL                                                                                                                                                                                                                                                                                                                                                                                           |                                                                                                                                                                                                                                                                                                                                                                                                                                                                                                                                                                                                                                                                                                                                                                                                                                                                                                                                                                                                                                     |                                      |                                   |                                    |                           |                  |                      |             |               |                                      |                                  |                               |                           |                                     |   |   |   |   |   |                                   |   |   |   |   |   |                                |   |   |   |   |   |                                                     |   |   |   |   |   |                      |   |   |   |   |   |                                     |   |   |   |   |   |  |

|        |                                                                                                                                                                                                                                                                                                                                                                           |                                                                                                                                                                                                                                                                                                                                                                                                                                                                                                                                                                                                                                                                                                                                                                                                                                                                                                                                                                                                                                                                                                                                                                 |                 |          |  |                                      |          |  |       |          |  |                      |          |  |  |
|--------|---------------------------------------------------------------------------------------------------------------------------------------------------------------------------------------------------------------------------------------------------------------------------------------------------------------------------------------------------------------------------|-----------------------------------------------------------------------------------------------------------------------------------------------------------------------------------------------------------------------------------------------------------------------------------------------------------------------------------------------------------------------------------------------------------------------------------------------------------------------------------------------------------------------------------------------------------------------------------------------------------------------------------------------------------------------------------------------------------------------------------------------------------------------------------------------------------------------------------------------------------------------------------------------------------------------------------------------------------------------------------------------------------------------------------------------------------------------------------------------------------------------------------------------------------------|-----------------|----------|--|--------------------------------------|----------|--|-------|----------|--|----------------------|----------|--|--|
|        |                                                                                                                                                                                                                                                                                                                                                                           | <table><tr><td>Quality of life</td><td>CRITICAL</td><td></td></tr><tr><td>Development of antibiotic resistance</td><td>CRITICAL</td><td></td></tr><tr><td>Death</td><td>CRITICAL</td><td></td></tr><tr><td>Adverse drug effects</td><td>CRITICAL</td><td></td></tr></table>                                                                                                                                                                                                                                                                                                                                                                                                                                                                                                                                                                                                                                                                                                                                                                                                                                                                                     | Quality of life | CRITICAL |  | Development of antibiotic resistance | CRITICAL |  | Death | CRITICAL |  | Adverse drug effects | CRITICAL |  |  |
|        | Quality of life                                                                                                                                                                                                                                                                                                                                                           | CRITICAL                                                                                                                                                                                                                                                                                                                                                                                                                                                                                                                                                                                                                                                                                                                                                                                                                                                                                                                                                                                                                                                                                                                                                        |                 |          |  |                                      |          |  |       |          |  |                      |          |  |  |
|        | Development of antibiotic resistance                                                                                                                                                                                                                                                                                                                                      | CRITICAL                                                                                                                                                                                                                                                                                                                                                                                                                                                                                                                                                                                                                                                                                                                                                                                                                                                                                                                                                                                                                                                                                                                                                        |                 |          |  |                                      |          |  |       |          |  |                      |          |  |  |
|        | Death                                                                                                                                                                                                                                                                                                                                                                     | CRITICAL                                                                                                                                                                                                                                                                                                                                                                                                                                                                                                                                                                                                                                                                                                                                                                                                                                                                                                                                                                                                                                                                                                                                                        |                 |          |  |                                      |          |  |       |          |  |                      |          |  |  |
|        | Adverse drug effects                                                                                                                                                                                                                                                                                                                                                      | CRITICAL                                                                                                                                                                                                                                                                                                                                                                                                                                                                                                                                                                                                                                                                                                                                                                                                                                                                                                                                                                                                                                                                                                                                                        |                 |          |  |                                      |          |  |       |          |  |                      |          |  |  |
| VALUES | <p><b>Is there important uncertainty about or variability in how much people value the main outcomes?</b></p> <ul style="list-style-type: none"><li>○ Important uncertainty or variability</li><li>● Possibly important uncertainty or variability</li><li>○ Probably no important uncertainty or variability</li><li>○ No important uncertainty or variability</li></ul> | <p>Values and preferences:</p> <p>Three relevant studies were identified that provide data on patient values and preferences:</p> <p>Mehta and Marras, 2011 evaluated the impact of pulmonary NTM on health-related quality of life. In this study, patients with pulmonary NTM had significantly impaired health-related quality of life with two QOL measures significantly lower than historical normal controls. Multivariable analysis showed an association between QOL scores and lung function</p> <p>Hong, et al, 2014 also evaluated the impact of pulmonary NTM on health-related quality of life. This was a direct comparison between patients with NTM disease and health subjects and found patients with NTM reported more health status issues and anxiety/depression issues than healthy controls. Lung function was also independently associated with QOL scores.</p> <p>Czaja, et al 2015 evaluated change in quality of life in response to various treatment regimens for M abscessus (many patients had coinfection with MAC or Pseudomonas). Mean QOL score was significantly improved after treatment at 3, 6, 12, and 24 months.</p> |                 |          |  |                                      |          |  |       |          |  |                      |          |  |  |

**Does the balance between desirable and undesirable effects favor the intervention or the comparison?**

- Favors the comparison
- Probably favors the comparison
- Does not favor either the intervention or the comparison
- Probably favors the intervention
- Favors the intervention
- Varies
- Don't know

**Shorter therapy duration compared to longer therapy duration for Mycobacterium abscessus pulmonary infection**

| Outcomes                                            | Anticipated absolute effects*<br>(95% CI) |                                      | Relative effect<br>(95% CI)      | Nº of participants<br>(studies) | Quality of the evidence<br>(GRADE) |
|-----------------------------------------------------|-------------------------------------------|--------------------------------------|----------------------------------|---------------------------------|------------------------------------|
|                                                     | Risk with longer therapy duration         | Risk with shorter therapy duration   |                                  |                                 |                                    |
| Cure of NTM                                         | 1000 per 1000                             | <b>750 per 1000</b><br>(470 to 1000) | <b>RR 0.75</b><br>(0.47 to 1.20) | 17<br>(1 observational study)   | ⊕○○○<br>VERY LOW<br>1,2,3          |
| Recurrence (relapse) - not measured                 | -                                         | -                                    | -                                | -                               | -                                  |
| Culture conversion - not reported                   | -                                         | -                                    | -                                | -                               | -                                  |
| Quality of life - not measured                      | -                                         | -                                    | -                                | -                               | -                                  |
| Development of antibiotic resistance - not measured | -                                         | -                                    | -                                | -                               | -                                  |
| Death - not reported                                | -                                         | -                                    | -                                | -                               | -                                  |
| Adverse drug effects - not reported                 | -                                         | -                                    | -                                | -                               | -                                  |

|                    |                                                                                                                                                                                                                                                                                                                                                                                                                                 |                                      |  |
|--------------------|---------------------------------------------------------------------------------------------------------------------------------------------------------------------------------------------------------------------------------------------------------------------------------------------------------------------------------------------------------------------------------------------------------------------------------|--------------------------------------|--|
| RESOURCES REQUIRED | <p><b>How large are the resource requirements (costs)?</b></p> <ul style="list-style-type: none"> <li>○ Large costs</li> <li>○ Moderate costs</li> <li>○ Negligible costs and savings</li> <li>○ Moderate savings</li> <li>○ Large savings</li> <li>● Varies</li> <li>○ Don't know</li> </ul>                                                                                                                                   | No research evidence was identified. |  |
| COST EFFECTIVENESS | <p><b>Does the cost-effectiveness of the intervention favor the intervention or the comparison?</b></p> <ul style="list-style-type: none"> <li>○ Favors the comparison</li> <li>○ Probably favors the comparison</li> <li>○ Does not favor either the intervention or the comparison</li> <li>○ Probably favors the intervention</li> <li>○ Favors the intervention</li> <li>● Varies</li> <li>○ No included studies</li> </ul> | No research evidence was identified. |  |
| EQUITY             | <p><b>What would be the impact on health equity?</b></p> <ul style="list-style-type: none"> <li>○ Reduced</li> <li>○ Probably reduced</li> <li>○ Probably no impact</li> <li>○ Probably increased</li> <li>○ Increased</li> <li>● Varies</li> <li>○ Don't know</li> </ul>                                                                                                                                                       | No research evidence was identified. |  |
| ACCEPTABILITY      | <p><b>Is the intervention acceptable to key stakeholders?</b></p> <ul style="list-style-type: none"> <li>○ No</li> <li>○ Probably no</li> <li>○ Probably yes</li> <li>○ Yes</li> </ul>                                                                                                                                                                                                                                          | No research evidence was identified. |  |



|             |                                                                                                                                                                                                                       |                                                                                                                                                                                                                                                                                                                                                                             |  |
|-------------|-----------------------------------------------------------------------------------------------------------------------------------------------------------------------------------------------------------------------|-----------------------------------------------------------------------------------------------------------------------------------------------------------------------------------------------------------------------------------------------------------------------------------------------------------------------------------------------------------------------------|--|
|             | <ul style="list-style-type: none"> <li>• Varies</li> <li>○ Don't know</li> </ul>                                                                                                                                      |                                                                                                                                                                                                                                                                                                                                                                             |  |
| FEASIBILITY | <p><b>Is the intervention feasible to implement?</b></p> <ul style="list-style-type: none"> <li>○ No</li> <li>○ Probably no</li> <li>• Probably yes</li> <li>○ Yes</li> <li>○ Varies</li> <li>○ Don't know</li> </ul> | <p>A study by Adjemian, et al in 2014 evaluated treatment of M abscessus and MAC, looking at compliance with the 2007 ATS/IDSA guidelines. This study found poor adherence with only 13% of antibiotic regimens compliant with guidelines. Of prescribed regimens for MAC, only 44% contained a macrolide, while 36% of regimens for M abscessus contained a macrolide.</p> |  |

## Summary of judgments

|                       | JUDGEMENT                            |                                               |                                                  |                                         |  |        |                     | IMPLICATIONS |
|-----------------------|--------------------------------------|-----------------------------------------------|--------------------------------------------------|-----------------------------------------|--|--------|---------------------|--------------|
| DESIRABLE EFFECTS     | Trivial                              | Small                                         | Moderate                                         | Large                                   |  | Varies | Don't know          |              |
| UNDESIRABLE EFFECTS   | Large                                | Moderate                                      | Small                                            | Trivial                                 |  | Varies | Don't know          |              |
| CERTAINTY OF EVIDENCE | Very low                             | Low                                           | Moderate                                         | High                                    |  |        | No included studies |              |
| VALUES                | Important uncertainty or variability | Possibly important uncertainty or variability | Probably no important uncertainty or variability | No important uncertainty or variability |  |        |                     |              |

|                           | JUDGEMENT             |                                |                                                          |                                  |                         |               |                     | IMPLICATIONS |
|---------------------------|-----------------------|--------------------------------|----------------------------------------------------------|----------------------------------|-------------------------|---------------|---------------------|--------------|
| <b>BALANCE OF EFFECTS</b> | Favors the comparison | Probably favors the comparison | Does not favor either the intervention or the comparison | Probably favors the intervention | Favors the intervention | <b>Varies</b> | Don't know          |              |
| <b>RESOURCES REQUIRED</b> | Large costs           | Moderate costs                 | Negligible costs and savings                             | Moderate savings                 | Large savings           | <b>Varies</b> | Don't know          |              |
| <b>COST EFFECTIVENESS</b> | Favors the comparison | Probably favors the comparison | Does not favor either the intervention or the comparison | Probably favors the intervention | Favors the intervention | <b>Varies</b> | No included studies |              |
| <b>EQUITY</b>             | Reduced               | Probably reduced               | Probably no impact                                       | Probably increased               | Increased               | <b>Varies</b> | Don't know          |              |
| <b>ACCEPTABILITY</b>      | No                    | Probably no                    | Probably yes                                             | Yes                              |                         | <b>Varies</b> | Don't know          |              |
| <b>FEASIBILITY</b>        | No                    | Probably no                    | <b>Probably yes</b>                                      | Yes                              |                         | Varies        | Don't know          |              |

## Conclusions

**In patients with *M. abscessus* pulmonary disease, should shorter or longer duration therapy be used for treatment?**

| TYPE OF RECOMMENDATION | Strong recommendation | Conditional recommendation | Conditional recommendation | Conditional recommendation | Strong recommendation |
|------------------------|-----------------------|----------------------------|----------------------------|----------------------------|-----------------------|
|------------------------|-----------------------|----------------------------|----------------------------|----------------------------|-----------------------|

|                                      | against the<br>intervention                                                                                                                                                                                                                                                                                                          | against the<br>intervention | for either the<br>intervention or<br>the comparison | for the<br>intervention | for the<br>intervention |
|--------------------------------------|--------------------------------------------------------------------------------------------------------------------------------------------------------------------------------------------------------------------------------------------------------------------------------------------------------------------------------------|-----------------------------|-----------------------------------------------------|-------------------------|-------------------------|
|                                      | ○                                                                                                                                                                                                                                                                                                                                    | ○                           | ●                                                   | ○                       | ○                       |
| <b>RECOMMENDATION</b>                | <p>In the absence of data to support a shorter or longer treatment course for <i>M. abscessus</i> pulmonary disease, the expert panel decided not to make a recommendation on the length of treatment.</p> <p>The expert panel voted unanimously for a conditional recommendation for either the intervention or the comparison.</p> |                             |                                                     |                         |                         |
| <b>JUSTIFICATION</b>                 | The one study identified was a very small study that indirectly addressed this question and was felt to be too low quality evidence upon which to base a recommendation.                                                                                                                                                             |                             |                                                     |                         |                         |
| <b>SUBGROUP CONSIDERATIONS</b>       | Nodular and cavitory disease need to be considered separately.                                                                                                                                                                                                                                                                       |                             |                                                     |                         |                         |
| <b>IMPLEMENTATION CONSIDERATIONS</b> |                                                                                                                                                                                                                                                                                                                                      |                             |                                                     |                         |                         |
| <b>MONITORING AND EVALUATION</b>     |                                                                                                                                                                                                                                                                                                                                      |                             |                                                     |                         |                         |
| <b>RESEARCH PRIORITIES</b>           | <p>Urgent need for biomarkers to individualize the duration of therapy.</p> <p>Randomized clinical trials of fixed regimens of different durations for both nodular and cavitory disease.</p>                                                                                                                                        |                             |                                                     |                         |                         |

## Table E4.22. Question XXII

Should surgery or medical therapy be used to treat NTM pulmonary disease?

|                       |                                                                                             |
|-----------------------|---------------------------------------------------------------------------------------------|
| <b>POPULATION:</b>    | NTM pulmonary infection                                                                     |
| <b>INTERVENTION:</b>  | surgery                                                                                     |
| <b>COMPARISON:</b>    | medical therapy                                                                             |
| <b>MAIN OUTCOMES:</b> | Cure of NTM; Death; Recurrence; Culture conversion; Surgical Complication; Quality of Life; |

## Assessment

|                   | JUDGEMENT                                                                                                                                                                                                                     | RESEARCH EVIDENCE                      |                 |                    |                |  | ADDITIONAL CONSIDERATIONS                                                                              |
|-------------------|-------------------------------------------------------------------------------------------------------------------------------------------------------------------------------------------------------------------------------|----------------------------------------|-----------------|--------------------|----------------|--|--------------------------------------------------------------------------------------------------------|
| DESIRABLE EFFECTS | <b>How substantial are the desirable anticipated effects?</b><br><br><div><div><div>○ Trivial</div><div>○ Small</div><div>● Moderate</div><div>○ Large</div></div><div><div>○ Varies</div><div>○ Don't know</div></div></div> |                                        |                 |                    |                |  | Data obtained from case series and outcomes with medical therapy not comparable with surgery outcomes. |
|                   | <b>Surgery compared to medical therapy for NTM pulmonary infection</b>                                                                                                                                                        |                                        |                 |                    |                |  |                                                                                                        |
|                   | Outcomes                                                                                                                                                                                                                      | Anticipated absolute effects* (95% CI) | Relative effect | Nº of participants | Quality of the |  |                                                                                                        |

UNDESIRABLE EFFECTS

How substantial are the undesirable anticipated effects?

○ Large

○ Moderate

● Small

○ Trivial

○ Varies

○ Don't know

|                                | Risk with medical therapy | Risk with surgery  | (95% CI)      | (studies)                         | evidence (GRADE)              |
|--------------------------------|---------------------------|--------------------|---------------|-----------------------------------|-------------------------------|
| Cure of NTM                    | 13/46<br>(28.2%)          | 13/23<br>(56.5%)   | not estimable | 69<br>(1 observational study)     | ⊕○○○<br>VERY LOW<br>1,2       |
| Death                          | 13/83<br>(15.7%)          | 20/486<br>(4.1%)   | not estimable | 569<br>(10 observational studies) | ⊕○○○<br>VERY LOW<br>2,3,4     |
| Recurrence                     | 12/102<br>(11.8%)         | 22/391<br>(5.6%)   | not estimable | 493<br>(9 observational studies)  | ⊕○○○<br>VERY LOW<br>1,2,3,4   |
| Culture conversion             | 18/46<br>(39.1%)          | 283/331<br>(85.5%) | not estimable | 377<br>(10 observational studies) | ⊕○○○<br>VERY LOW<br>1,2,3,4,5 |
| Surgical Complication          | not pooled                | 111/563<br>(19.7%) | not pooled    | 563<br>(9 observational studies)  | ⊕○○○<br>VERY LOW<br>1,3,4     |
| Quality of Life - not measured | -                         | -                  | -             | -                                 | -                             |

| CERTAINTY OF EVIDENCE | <p><b>What is the overall certainty of the evidence of effects?</b></p> <ul style="list-style-type: none"><li>• Very low</li><li>○ Low</li><li>○ Moderate</li><li>○ High</li><li>○ No included studies</li></ul>                                                                                                                                                          | <p><b>The relative importance or values of the main outcomes of interest:</b></p> <table><tr><th>Outcome</th><th>Relative importance</th><th>Certainty of the evidence (GRADE)</th></tr><tr><td>Cure of NTM</td><td>CRITICAL</td><td>⊕○○○<br/>VERY LOW</td></tr><tr><td>Death</td><td>CRITICAL</td><td>⊕○○○<br/>VERY LOW</td></tr><tr><td>Recurrence</td><td>CRITICAL</td><td>⊕○○○<br/>VERY LOW</td></tr><tr><td>Culture conversion</td><td>CRITICAL</td><td>⊕○○○<br/>VERY LOW</td></tr><tr><td>Surgical Complication</td><td>CRITICAL</td><td>⊕○○○<br/>VERY LOW</td></tr><tr><td>Quality of Life</td><td>CRITICAL</td><td>-</td></tr></table>                                                                                                                                                                                                  |                                   | Outcome | Relative importance | Certainty of the evidence (GRADE) | Cure of NTM | CRITICAL | ⊕○○○<br>VERY LOW | Death | CRITICAL | ⊕○○○<br>VERY LOW | Recurrence | CRITICAL | ⊕○○○<br>VERY LOW | Culture conversion | CRITICAL | ⊕○○○<br>VERY LOW | Surgical Complication | CRITICAL | ⊕○○○<br>VERY LOW | Quality of Life | CRITICAL | - |
|-----------------------|---------------------------------------------------------------------------------------------------------------------------------------------------------------------------------------------------------------------------------------------------------------------------------------------------------------------------------------------------------------------------|-------------------------------------------------------------------------------------------------------------------------------------------------------------------------------------------------------------------------------------------------------------------------------------------------------------------------------------------------------------------------------------------------------------------------------------------------------------------------------------------------------------------------------------------------------------------------------------------------------------------------------------------------------------------------------------------------------------------------------------------------------------------------------------------------------------------------------------------------|-----------------------------------|---------|---------------------|-----------------------------------|-------------|----------|------------------|-------|----------|------------------|------------|----------|------------------|--------------------|----------|------------------|-----------------------|----------|------------------|-----------------|----------|---|
|                       | Outcome                                                                                                                                                                                                                                                                                                                                                                   | Relative importance                                                                                                                                                                                                                                                                                                                                                                                                                                                                                                                                                                                                                                                                                                                                                                                                                             | Certainty of the evidence (GRADE) |         |                     |                                   |             |          |                  |       |          |                  |            |          |                  |                    |          |                  |                       |          |                  |                 |          |   |
|                       | Cure of NTM                                                                                                                                                                                                                                                                                                                                                               | CRITICAL                                                                                                                                                                                                                                                                                                                                                                                                                                                                                                                                                                                                                                                                                                                                                                                                                                        | ⊕○○○<br>VERY LOW                  |         |                     |                                   |             |          |                  |       |          |                  |            |          |                  |                    |          |                  |                       |          |                  |                 |          |   |
|                       | Death                                                                                                                                                                                                                                                                                                                                                                     | CRITICAL                                                                                                                                                                                                                                                                                                                                                                                                                                                                                                                                                                                                                                                                                                                                                                                                                                        | ⊕○○○<br>VERY LOW                  |         |                     |                                   |             |          |                  |       |          |                  |            |          |                  |                    |          |                  |                       |          |                  |                 |          |   |
|                       | Recurrence                                                                                                                                                                                                                                                                                                                                                                | CRITICAL                                                                                                                                                                                                                                                                                                                                                                                                                                                                                                                                                                                                                                                                                                                                                                                                                                        | ⊕○○○<br>VERY LOW                  |         |                     |                                   |             |          |                  |       |          |                  |            |          |                  |                    |          |                  |                       |          |                  |                 |          |   |
|                       | Culture conversion                                                                                                                                                                                                                                                                                                                                                        | CRITICAL                                                                                                                                                                                                                                                                                                                                                                                                                                                                                                                                                                                                                                                                                                                                                                                                                                        | ⊕○○○<br>VERY LOW                  |         |                     |                                   |             |          |                  |       |          |                  |            |          |                  |                    |          |                  |                       |          |                  |                 |          |   |
|                       | Surgical Complication                                                                                                                                                                                                                                                                                                                                                     | CRITICAL                                                                                                                                                                                                                                                                                                                                                                                                                                                                                                                                                                                                                                                                                                                                                                                                                                        | ⊕○○○<br>VERY LOW                  |         |                     |                                   |             |          |                  |       |          |                  |            |          |                  |                    |          |                  |                       |          |                  |                 |          |   |
| Quality of Life       | CRITICAL                                                                                                                                                                                                                                                                                                                                                                  | -                                                                                                                                                                                                                                                                                                                                                                                                                                                                                                                                                                                                                                                                                                                                                                                                                                               |                                   |         |                     |                                   |             |          |                  |       |          |                  |            |          |                  |                    |          |                  |                       |          |                  |                 |          |   |
| VALUES                | <p><b>Is there important uncertainty about or variability in how much people value the main outcomes?</b></p> <ul style="list-style-type: none"><li>○ Important uncertainty or variability</li><li>• Possibly important uncertainty or variability</li><li>○ Probably no important uncertainty or variability</li><li>○ No important uncertainty or variability</li></ul> | <p>Values and preferences:</p> <p>Three relevant studies were identified that provide data on patient values and preferences:</p> <p>Mehta and Marras, 2011 evaluated the impact of pulmonary NTM on health-related quality of life. In this study, patients with pulmonary NTM had significantly impaired health-related quality of life with two QOL measures significantly lower than historical normal controls. Multivariable analysis showed an association between QOL scores and lung function</p> <p>Hong, et al, 2014 also evaluated the impact of pulmonary NTM on health-related quality of life. This was a direct comparison between patients with NTM disease and health subjects and found patients with NTM reported more health status issues and anxiety/depression issues than healthy controls. Lung function was also</p> |                                   |         |                     |                                   |             |          |                  |       |          |                  |            |          |                  |                    |          |                  |                       |          |                  |                 |          |   |

|                    |                                                                                                                                                                                                                                                                                                                                                                            | <p>independently associated with QOL scores.</p> <p>Czaja, et al 2015 evaluated change in quality of life in response to various treatment regimens for M abscessus (many patients had coinfection with MAC or Pseudomonas). Mean QOL score was significantly improved after treatment at 3, 6, 12, and 24 months.</p>                                                                                                                                                                                                                                                                                                                                                                                                                                                                                                                                                                                                                                                                                                                                                                                                                                                                                                                                                                                                                |                                                                 |                          |                                |                                       |  |  |          |                                        |  |                          |                              |                                 |                           |                   |             |               |                      |               |                            |                                 |       |               |                      |               |                                |                                   |            |                |                      |               |                               |                                     |                    |               |                        |               |                                |                                       |          |            |                |     |                      |              |  |
|--------------------|----------------------------------------------------------------------------------------------------------------------------------------------------------------------------------------------------------------------------------------------------------------------------------------------------------------------------------------------------------------------------|---------------------------------------------------------------------------------------------------------------------------------------------------------------------------------------------------------------------------------------------------------------------------------------------------------------------------------------------------------------------------------------------------------------------------------------------------------------------------------------------------------------------------------------------------------------------------------------------------------------------------------------------------------------------------------------------------------------------------------------------------------------------------------------------------------------------------------------------------------------------------------------------------------------------------------------------------------------------------------------------------------------------------------------------------------------------------------------------------------------------------------------------------------------------------------------------------------------------------------------------------------------------------------------------------------------------------------------|-----------------------------------------------------------------|--------------------------|--------------------------------|---------------------------------------|--|--|----------|----------------------------------------|--|--------------------------|------------------------------|---------------------------------|---------------------------|-------------------|-------------|---------------|----------------------|---------------|----------------------------|---------------------------------|-------|---------------|----------------------|---------------|--------------------------------|-----------------------------------|------------|----------------|----------------------|---------------|-------------------------------|-------------------------------------|--------------------|---------------|------------------------|---------------|--------------------------------|---------------------------------------|----------|------------|----------------|-----|----------------------|--------------|--|
| BALANCE OF EFFECTS | <p><b>Does the balance between desirable and undesirable effects favor the intervention or the comparison?</b></p> <p>○ Favors the comparison</p> <p>○ Probably favors the comparison</p> <p>○ Does not favor either the intervention or the comparison</p> <p>● Probably favors the intervention</p> <p>○ Favors the intervention</p> <p>○ Varies</p> <p>○ Don't know</p> | <table><tr><th colspan="6">Surgery compared to medical therapy for NTM pulmonary infection</th></tr><tr><th rowspan="2">Outcomes</th><th colspan="2">Anticipated absolute effects* (95% CI)</th><th rowspan="2">Relative effect (95% CI)</th><th rowspan="2">Nº of participants (studies)</th><th rowspan="2">Quality of the evidence (GRADE)</th></tr><tr><th>Risk with medical therapy</th><th>Risk with surgery</th></tr><tr><td>Cure of NTM</td><td>13/46 (28.2%)</td><td><b>13/23 (56.5%)</b></td><td>not estimable</td><td>69 (1 observational study)</td><td>⊕○○○<br/>VERY LOW<sup>1,2</sup></td></tr><tr><td>Death</td><td>13/83 (15.7%)</td><td><b>20/486 (4.1%)</b></td><td>not estimable</td><td>569 (10 observational studies)</td><td>⊕○○○<br/>VERY LOW<sup>2,3,4</sup></td></tr><tr><td>Recurrence</td><td>12/102 (11.8%)</td><td><b>22/391 (5.6%)</b></td><td>not estimable</td><td>493 (9 observational studies)</td><td>⊕○○○<br/>VERY LOW<sup>1,2,3,4</sup></td></tr><tr><td>Culture conversion</td><td>18/46 (39.1%)</td><td><b>283/331 (85.5%)</b></td><td>not estimable</td><td>377 (10 observational studies)</td><td>⊕○○○<br/>VERY LOW<sup>1,2,3,4,5</sup></td></tr><tr><td>Surgical</td><td>not pooled</td><td><b>111/563</b></td><td>not</td><td>563 (9 observational</td><td>⊕○○○<br/>VERY</td></tr></table> | Surgery compared to medical therapy for NTM pulmonary infection |                          |                                |                                       |  |  | Outcomes | Anticipated absolute effects* (95% CI) |  | Relative effect (95% CI) | Nº of participants (studies) | Quality of the evidence (GRADE) | Risk with medical therapy | Risk with surgery | Cure of NTM | 13/46 (28.2%) | <b>13/23 (56.5%)</b> | not estimable | 69 (1 observational study) | ⊕○○○<br>VERY LOW <sup>1,2</sup> | Death | 13/83 (15.7%) | <b>20/486 (4.1%)</b> | not estimable | 569 (10 observational studies) | ⊕○○○<br>VERY LOW <sup>2,3,4</sup> | Recurrence | 12/102 (11.8%) | <b>22/391 (5.6%)</b> | not estimable | 493 (9 observational studies) | ⊕○○○<br>VERY LOW <sup>1,2,3,4</sup> | Culture conversion | 18/46 (39.1%) | <b>283/331 (85.5%)</b> | not estimable | 377 (10 observational studies) | ⊕○○○<br>VERY LOW <sup>1,2,3,4,5</sup> | Surgical | not pooled | <b>111/563</b> | not | 563 (9 observational | ⊕○○○<br>VERY |  |
|                    | Surgery compared to medical therapy for NTM pulmonary infection                                                                                                                                                                                                                                                                                                            |                                                                                                                                                                                                                                                                                                                                                                                                                                                                                                                                                                                                                                                                                                                                                                                                                                                                                                                                                                                                                                                                                                                                                                                                                                                                                                                                       |                                                                 |                          |                                |                                       |  |  |          |                                        |  |                          |                              |                                 |                           |                   |             |               |                      |               |                            |                                 |       |               |                      |               |                                |                                   |            |                |                      |               |                               |                                     |                    |               |                        |               |                                |                                       |          |            |                |     |                      |              |  |
|                    | Outcomes                                                                                                                                                                                                                                                                                                                                                                   | Anticipated absolute effects* (95% CI)                                                                                                                                                                                                                                                                                                                                                                                                                                                                                                                                                                                                                                                                                                                                                                                                                                                                                                                                                                                                                                                                                                                                                                                                                                                                                                |                                                                 | Relative effect (95% CI) | Nº of participants (studies)   | Quality of the evidence (GRADE)       |  |  |          |                                        |  |                          |                              |                                 |                           |                   |             |               |                      |               |                            |                                 |       |               |                      |               |                                |                                   |            |                |                      |               |                               |                                     |                    |               |                        |               |                                |                                       |          |            |                |     |                      |              |  |
|                    |                                                                                                                                                                                                                                                                                                                                                                            | Risk with medical therapy                                                                                                                                                                                                                                                                                                                                                                                                                                                                                                                                                                                                                                                                                                                                                                                                                                                                                                                                                                                                                                                                                                                                                                                                                                                                                                             | Risk with surgery                                               |                          |                                |                                       |  |  |          |                                        |  |                          |                              |                                 |                           |                   |             |               |                      |               |                            |                                 |       |               |                      |               |                                |                                   |            |                |                      |               |                               |                                     |                    |               |                        |               |                                |                                       |          |            |                |     |                      |              |  |
|                    | Cure of NTM                                                                                                                                                                                                                                                                                                                                                                | 13/46 (28.2%)                                                                                                                                                                                                                                                                                                                                                                                                                                                                                                                                                                                                                                                                                                                                                                                                                                                                                                                                                                                                                                                                                                                                                                                                                                                                                                                         | <b>13/23 (56.5%)</b>                                            | not estimable            | 69 (1 observational study)     | ⊕○○○<br>VERY LOW <sup>1,2</sup>       |  |  |          |                                        |  |                          |                              |                                 |                           |                   |             |               |                      |               |                            |                                 |       |               |                      |               |                                |                                   |            |                |                      |               |                               |                                     |                    |               |                        |               |                                |                                       |          |            |                |     |                      |              |  |
|                    | Death                                                                                                                                                                                                                                                                                                                                                                      | 13/83 (15.7%)                                                                                                                                                                                                                                                                                                                                                                                                                                                                                                                                                                                                                                                                                                                                                                                                                                                                                                                                                                                                                                                                                                                                                                                                                                                                                                                         | <b>20/486 (4.1%)</b>                                            | not estimable            | 569 (10 observational studies) | ⊕○○○<br>VERY LOW <sup>2,3,4</sup>     |  |  |          |                                        |  |                          |                              |                                 |                           |                   |             |               |                      |               |                            |                                 |       |               |                      |               |                                |                                   |            |                |                      |               |                               |                                     |                    |               |                        |               |                                |                                       |          |            |                |     |                      |              |  |
|                    | Recurrence                                                                                                                                                                                                                                                                                                                                                                 | 12/102 (11.8%)                                                                                                                                                                                                                                                                                                                                                                                                                                                                                                                                                                                                                                                                                                                                                                                                                                                                                                                                                                                                                                                                                                                                                                                                                                                                                                                        | <b>22/391 (5.6%)</b>                                            | not estimable            | 493 (9 observational studies)  | ⊕○○○<br>VERY LOW <sup>1,2,3,4</sup>   |  |  |          |                                        |  |                          |                              |                                 |                           |                   |             |               |                      |               |                            |                                 |       |               |                      |               |                                |                                   |            |                |                      |               |                               |                                     |                    |               |                        |               |                                |                                       |          |            |                |     |                      |              |  |
|                    | Culture conversion                                                                                                                                                                                                                                                                                                                                                         | 18/46 (39.1%)                                                                                                                                                                                                                                                                                                                                                                                                                                                                                                                                                                                                                                                                                                                                                                                                                                                                                                                                                                                                                                                                                                                                                                                                                                                                                                                         | <b>283/331 (85.5%)</b>                                          | not estimable            | 377 (10 observational studies) | ⊕○○○<br>VERY LOW <sup>1,2,3,4,5</sup> |  |  |          |                                        |  |                          |                              |                                 |                           |                   |             |               |                      |               |                            |                                 |       |               |                      |               |                                |                                   |            |                |                      |               |                               |                                     |                    |               |                        |               |                                |                                       |          |            |                |     |                      |              |  |
| Surgical           | not pooled                                                                                                                                                                                                                                                                                                                                                                 | <b>111/563</b>                                                                                                                                                                                                                                                                                                                                                                                                                                                                                                                                                                                                                                                                                                                                                                                                                                                                                                                                                                                                                                                                                                                                                                                                                                                                                                                        | not                                                             | 563 (9 observational     | ⊕○○○<br>VERY                   |                                       |  |  |          |                                        |  |                          |                              |                                 |                           |                   |             |               |                      |               |                            |                                 |       |               |                      |               |                                |                                   |            |                |                      |               |                               |                                     |                    |               |                        |               |                                |                                       |          |            |                |     |                      |              |  |

|                                |                                                                                                                                                                                                                                                                                                                                                                                                                  |                                                                                                                                                                                                                                                 |              |                      |        |          |                      |                                |   |   |   |   |  |  |  |  |  |  |
|--------------------------------|------------------------------------------------------------------------------------------------------------------------------------------------------------------------------------------------------------------------------------------------------------------------------------------------------------------------------------------------------------------------------------------------------------------|-------------------------------------------------------------------------------------------------------------------------------------------------------------------------------------------------------------------------------------------------|--------------|----------------------|--------|----------|----------------------|--------------------------------|---|---|---|---|--|--|--|--|--|--|
|                                |                                                                                                                                                                                                                                                                                                                                                                                                                  | <table><tr><td>Complication</td><td>(19.7%)</td><td>pooled</td><td>studies)</td><td>LOW<sup>1,3,4</sup></td></tr><tr><td>Quality of Life - not measured</td><td>-</td><td>-</td><td>-</td><td>-</td></tr><tr><td colspan="5"></td></tr></table> | Complication | (19.7%)              | pooled | studies) | LOW <sup>1,3,4</sup> | Quality of Life - not measured | - | - | - | - |  |  |  |  |  |  |
| Complication                   | (19.7%)                                                                                                                                                                                                                                                                                                                                                                                                          | pooled                                                                                                                                                                                                                                          | studies)     | LOW <sup>1,3,4</sup> |        |          |                      |                                |   |   |   |   |  |  |  |  |  |  |
| Quality of Life - not measured | -                                                                                                                                                                                                                                                                                                                                                                                                                | -                                                                                                                                                                                                                                               | -            | -                    |        |          |                      |                                |   |   |   |   |  |  |  |  |  |  |
|                                |                                                                                                                                                                                                                                                                                                                                                                                                                  |                                                                                                                                                                                                                                                 |              |                      |        |          |                      |                                |   |   |   |   |  |  |  |  |  |  |
| RESOURCES REQUIRED             | <b>How large are the resource requirements (costs)?</b> <ul style="list-style-type: none"><li>○ Large costs</li><li>● Moderate costs</li><li>○ Negligible costs and savings</li><li>○ Moderate savings</li><li>○ Large savings</li><li>○ Varies</li><li>○ Don't know</li></ul>                                                                                                                                   | No research evidence was identified.                                                                                                                                                                                                            |              |                      |        |          |                      |                                |   |   |   |   |  |  |  |  |  |  |
| COST EFFECTIVENESS             | <b>Does the cost-effectiveness of the intervention favor the intervention or the comparison?</b> <ul style="list-style-type: none"><li>○ Favors the comparison</li><li>○ Probably favors the comparison</li><li>○ Does not favor either the intervention or the comparison</li><li>○ Probably favors the intervention</li><li>○ Favors the intervention</li><li>● Varies</li><li>○ No included studies</li></ul> | No research evidence was identified.                                                                                                                                                                                                            |              |                      |        |          |                      |                                |   |   |   |   |  |  |  |  |  |  |
| EQUITY                         | <b>What would be the impact on health equity?</b>                                                                                                                                                                                                                                                                                                                                                                | No research evidence was identified.                                                                                                                                                                                                            |              |                      |        |          |                      |                                |   |   |   |   |  |  |  |  |  |  |



|               |                                                                                                                                                                                                                         |                                      |  |
|---------------|-------------------------------------------------------------------------------------------------------------------------------------------------------------------------------------------------------------------------|--------------------------------------|--|
|               | <ul style="list-style-type: none"> <li>○ Reduced</li> <li>● Probably reduced</li> <li>○ Probably no impact</li> <li>○ Probably increased</li> <li>○ Increased</li> <li>○ Varies</li> <li>○ Don't know</li> </ul>        |                                      |  |
| ACCEPTABILITY | <b>Is the intervention acceptable to key stakeholders?</b> <ul style="list-style-type: none"> <li>○ No</li> <li>○ Probably no</li> <li>● Probably yes</li> <li>○ Yes</li> <li>○ Varies</li> <li>○ Don't know</li> </ul> | No research evidence was identified. |  |
| FEASIBILITY   | <b>Is the intervention feasible to implement?</b> <ul style="list-style-type: none"> <li>○ No</li> <li>○ Probably no</li> <li>● Probably yes</li> <li>○ Yes</li> <li>○ Varies</li> <li>○ Don't know</li> </ul>          | No research evidence was identified. |  |

## Summary of judgments

|           | JUDGEMENT |       |          |       |  |        |            | IMPLICATIONS |
|-----------|-----------|-------|----------|-------|--|--------|------------|--------------|
| DESIRABLE | Trivial   | Small | Moderate | Large |  | Varies | Don't know |              |

|                       | JUDGEMENT                            |                                               |                                                          |                                         |                         |        |                     | IMPLICATIONS |
|-----------------------|--------------------------------------|-----------------------------------------------|----------------------------------------------------------|-----------------------------------------|-------------------------|--------|---------------------|--------------|
| EFFECTS               |                                      |                                               |                                                          |                                         |                         |        |                     |              |
| UNDESIRABLE EFFECTS   | Large                                | Moderate                                      | Small                                                    | Trivial                                 |                         | Varies | Don't know          |              |
| CERTAINTY OF EVIDENCE | Very low                             | Low                                           | Moderate                                                 | High                                    |                         |        | No included studies |              |
| VALUES                | Important uncertainty or variability | Possibly important uncertainty or variability | Probably no important uncertainty or variability         | No important uncertainty or variability |                         |        |                     |              |
| BALANCE OF EFFECTS    | Favors the comparison                | Probably favors the comparison                | Does not favor either the intervention or the comparison | Probably favors the intervention        | Favors the intervention | Varies | Don't know          |              |
| RESOURCES REQUIRED    | Large costs                          | Moderate costs                                | Negligible costs and savings                             | Moderate savings                        | Large savings           | Varies | Don't know          |              |
| COST EFFECTIVENESS    | Favors the comparison                | Probably favors the comparison                | Does not favor either the intervention or the comparison | Probably favors the intervention        | Favors the intervention | Varies | No included studies |              |
| EQUITY                | Reduced                              | Probably reduced                              | Probably no impact                                       | Probably increased                      | Increased               | Varies | Don't know          |              |

|               | JUDGEMENT |             |              |     |  |        |            | IMPLICATIONS |
|---------------|-----------|-------------|--------------|-----|--|--------|------------|--------------|
| ACCEPTABILITY | No        | Probably no | Probably yes | Yes |  | Varies | Don't know |              |
| FEASIBILITY   | No        | Probably no | Probably yes | Yes |  | Varies | Don't know |              |

## Conclusions

**Should surgery plus medical therapy or medical therapy alone be used to treat NTM pulmonary disease?**

| TYPE OF RECOMMENDATION | Strong recommendation against the intervention | Conditional recommendation against the intervention | Conditional recommendation for either the intervention or the comparison | Conditional recommendation for the intervention | Strong recommendation for the intervention |
|------------------------|------------------------------------------------|-----------------------------------------------------|--------------------------------------------------------------------------|-------------------------------------------------|--------------------------------------------|
|                        | ○                                              | ○                                                   | ○                                                                        | ●                                               | ○                                          |

|                                      |                                                                                                                                                                                                                                                                                                                              |
|--------------------------------------|------------------------------------------------------------------------------------------------------------------------------------------------------------------------------------------------------------------------------------------------------------------------------------------------------------------------------|
| <b>RECOMMENDATION</b>                | <p>In selected patients with NTM pulmonary disease, we suggest surgical resection as an adjuvant to medical therapy after expert consultation (conditional recommendation, very low confidence in estimates of effect).</p> <p>The expert panel voted unanimously for a conditional recommendation for the intervention.</p> |
| <b>JUSTIFICATION</b>                 | <p>Consider whether surgical resection can improve treatment outcomes or potential to be curative. Prognosis can be improved in select cases: hemoptysis, localized cavitary disease, macrolide resistance.</p>                                                                                                              |
| <b>SUBGROUP CONSIDERATIONS</b>       |                                                                                                                                                                                                                                                                                                                              |
| <b>IMPLEMENTATION CONSIDERATIONS</b> |                                                                                                                                                                                                                                                                                                                              |
| <b>MONITORING AND EVALUATION</b>     |                                                                                                                                                                                                                                                                                                                              |
| <b>RESEARCH PRIORITIES</b>           |                                                                                                                                                                                                                                                                                                                              |
